# Supplementary material for: Complex mutation profiles in mismatch repair and ribonucleotide reductase mutants reveal novel repair substrate specificity of MutS homolog (MSH) complexes
Source: Oxford University Press journal article supplement (doi:10.1093/genetics/iyac092), 2022-06-10
Supplement: iyac092_supplemental_figure_legends.pdf [file iyac092_supplemental_figure_legends.pdf]

## Supplementary Figure Legends

**Figure S1. Absolute variant frequency is consistent with selection at *CAN1*.** **(A)** The absolute variant frequency was calculated by taking the sum of variant frequencies in each genotype and averaging for all biological replicates sequenced in a genotype. Error bars represent the standard deviation between biological replicates within a genotype. The number of total biological replicates sequenced varied by genotype; numbers are displayed in Table S3. Samples grown under permissive conditions, from four genotypes, are graphed in peach. All other samples grown under selection are graphed in turquoise. **(B)** The average absolute variant frequency before (red) and after (turquoise) the permissive variant filter was applied.

**Figure S2. Hierarchical cluster analysis using cosine similarity score analysis on all individual samples in our study.** Boxed in black are notable clusters where biological replicates from the same genotypes cluster together. Throughout, biological replicates tended to cluster. Similarly, *rnr1Y285F pGAL-RNR1* and *rnr1Y285A pGAL-RNR1* strains clustered with *rnr1Y285F* and *rnr1Y285A* strain, respectively.

**Figure S3. Mutation spectra comparison between *rnr1* alleles and *rnr1-pGAL-RNR1* counterparts.** **(A)** The SNV spectra normalized out of total SNVs and **(B)** total variants. **(C)** The deletion spectra normalized out of total deletions and **(D)** total variants. **(E)** The insertion spectra normalized out of total insertions and **(F)** total variants. To compare the individual frequencies between genotypes, we took the average frequency and calculated the standard error of the mean (SEM) (**Fig. S4**). Error bars are not shown here for ease of viewing the data.

**Figure S4. Average variant frequency of each variant type as a function of genotype.** The average variant frequency for each genotype is shown. At least 4 independent biological replicates were sequenced for each genotype. The error bars represent the standard error of the mean (SEM). **(A)** G/C 1 bp deletions (top) and insertions (bottom), **(B)** A/T 1 bp deletions (top) and insertions (bottom), **(C)** >1 bp deletions (top) and insertions (bottom), **(D)** mononucleotide variant (top) and replacements (bottom), **(E)** single nucleotide variants: C/G>A/T, C/G>G/C, C/G>T/A (left) and T/A>AT, T/A>C/G and T/A>G/C (right).

**Figure S5. Hierarchical cluster analysis of mutation signatures from this study compared with COSMIC SBS signatures.** The single base substitutions (SBS) COSMIC signatures from GRCh38 (v3.2-March 2021, <https://cancer.sanger.ac.uk/signatures/downloads/>) were combined with the normalized SNVs in trinucleotide context (**Fig. 4**). Our samples formed a distinct cluster, which included COSMIC signature SBS32, a mutation profile associated with azathioprine treatment (**box I**). A second cluster (**box II**) correlated well with several of our samples (**Table S20**). Clustering was performed based on cosine similarity scores.
