# Supplementary material for: Complex mutation profiles in mismatch repair and ribonucleotide reductase mutants reveal novel repair substrate specificity of MutS homolog (MSH) complexes
Source: Oxford University Press journal article supplement (doi:10.1093/genetics/iyac092), 2022-06-10
Supplement: iyac092_tables_s3_s10_sga_data.xlsx [file iyac092_tables_s3_s10_sga_data.xlsx]

## Sheet: Table S3. Merged SGA data
Table S3. Merged SGA data
Array ORF	Array Name	Array Allele	rnr1D57N Score (epsilon)	rnr1D57N z-score	rnr1Y285A Score (epsilon)	rnr1Y285A z-score	rnr1Y285F Score (epsilon)	rnr1Y285F z-score
YOR239W	YOR240W	yor240w	0.00895	0.0590537	-0.03832	-0.645856	-0.96743	-12.3336
YOR288C	MPD1	mpd1	0.01749	0.182469	0.03418	0.321661	-0.83899	-10.7088
YPL183W-A	RTC6	rtc6	-0.07862	-1.20646	-0.03809	-0.642787	-0.72685	-9.29025
YDL126C	CDC48	cdc48-9	0.03971	0.503579	-0.07714	-1.16391	-0.59967	-7.68143
YPL140C	MKK2	mkk2	0.02402	0.276836	0.03959	0.393858	-0.55206	-7.07916
YOR253W	NAT5	nat5	-0.03842	-0.625509	-0.05985	-0.933175	-0.52396	-6.7237
YNR044W	AGA1	aga1	0.0297	0.35892	-0.02703	-0.49519	-0.46349	-5.95875
YIR011C	STS1	sts1-ph	0.01787	0.18796	-0.04897	-0.787981	-0.4589	-5.90069
YOR250C	CLP1	clp1-ph	-0.29563	-4.34256	-0.44137	-6.02458	-0.44151	-5.68071
YLR298C	YHC1	yhc1-7	-0.28248	-4.15252	-0.17314	-2.44504	-0.41928	-5.3995
YJR006W	HYS2	hys2-ts	-0.11431	-1.72223	-0.08005	-1.20275	-0.39336	-5.07161
YGL133W	ITC1	itc1	-0.04833	-0.768723	0.04915	0.521437	-0.39149	-5.04795
YMR296C	LCB1	lcb1-4	-0.01166	-0.23879	0.04906	0.520236	-0.37941	-4.89514
YPR051W	MAK3	mak3	-0.2993	-4.39559	0.01685	0.0903911	-0.33862	-4.37915
YBR294W	SUL1	sul1	0.02143	0.239407	-0.49495	-6.73961	-0.33379	-4.31805
YDR080W	VPS41	vps41	0.01577	0.157612	-0.29479	-4.06846	-0.29693	-3.85177
YJR057W	CDC8	cdc8-1	0.15122	2.11506	-0.09859	-1.45016	-0.27523	-3.57727
YJR077C	MIR1	mir1	-0.0554	-0.870894	-0.11835	-1.71386	-0.26964	-3.50655
YLR168C	UPS2	ups2	0.05068	0.662111	-0.0027	-0.170505	-0.25955	-3.37891
YGL196W	DSD1	dsd1	-0.01431	-0.277086	-0.10185	-1.49367	-0.25866	-3.36766
YOR294W	RRS1	rrs1-124	0.0374	0.470196	-0.05868	-0.917562	-0.25848	-3.36538
YJR076C	CDC11	cdc11-5	-0.07592	-1.16744	-0.26253	-3.63795	-0.247	-3.22016
YOR358W	HAP5	hap5	0.20423	2.88112	0.21627	2.75166	-0.23861	-3.11402
YDR150W	NUM1	num1	-0.01516	-0.28937	0.085195	1.00246	-0.23286	-3.04129
YKR022C	YKR022C	ykr022c-ph	-0.03978	-0.645163	0.00758	-0.0333176	-0.22204	-2.90441
YPL233W	NSL1	nsl1-6	0.39431	5.62805	0.3592	4.65907	-0.2129	-2.78879
YFL034C-B	MOB2	mob2-11	0.01641	0.166861	0.03157	0.28683	-0.21059	-2.75957
YNL121C	TOM70	tom70	-0.42225	-6.17239	-0.13157	-1.89028	-0.21052	-2.75868
YHR172W	YHR172W	yhr172w-ph	-0.25293	-3.72548	0.04686	0.490876	-0.20908	-2.74047
YDL082W	RPL13A	rpl13a	0.06026	0.800555	0.11609	1.41476	-0.20361	-2.67127
YDR057W	YOS9	yos9	-0.00274	-0.109883	0.07668	0.888826	-0.20287	-2.66191
YPR189W	SKI3	ski3	-0.01165	-0.238645	-0.00782	-0.238832	-0.20221	-2.65356
YDL105W	NSE4	nse4-ph	0.26359	3.73896	0.08527	1.00346	-0.20202	-2.65116
YOR366W	YOR366W	yor366w	-0.0394	-0.639672	-0.01574	-0.344525	-0.20174	-2.64762
YFL034C-B	MOB2	mob2-22	-0.04949	-0.785487	-0.12448	-1.79567	-0.19909	-2.6141
YOR204W	DED1	ded1-f144c	0.01191	0.10183	-0.09772	-1.43855	-0.19183	-2.52226
YBR055C	PRP6	prp6-ts	0.00513	0.00384933	-0.33515	-4.60707	-0.19076	-2.50872
YGR245C	SDA1	sda1-2	-0.03882	-0.63129	0.00884	-0.0165028	-0.18234	-2.40221
YML131W	YML131W	yml131w	-0.01967	-0.354546	-0.01497	-0.334249	-0.18178	-2.39512
YPL082C	MOT1	mot1-1033	-0.14252	-2.1299	-0.0701	-1.06996	-0.18115	-2.38715
YDL003W	YDL003W	ydl003w-ph	-0.0824	-1.26108	-0.11353	-1.64954	-0.17922	-2.36274
YDL070W	BDF2	bdf2	0.07344	0.991025	-0.18092	-2.54886	-0.17632	-2.32605
YJL081C	ARP4	arp4-g161d	-0.01565	-0.296451	-0.04568	-0.744076	-0.17426	-2.3
YJL034W	KAR2	kar2-159	0.02347	0.268888	-0.03399	-0.588072	-0.17112	-2.26027
YDL223C	HBT1	hbt1	0.02468	0.286374	-0.27122	-3.75392	-0.17031	-2.25003
YPL085W	SEC16	sec16-2	-0.02998	-0.50354	-0.02916	-0.523615	-0.16113	-2.1339
YHR008C	SOD2	sod2	-0.05723	-0.89734	-0.02274	-0.43794	-0.15937	-2.11164
YOR082C	YOR082C	yor082c	-0.07478	-1.15096	-0.18811	-2.64481	-0.15728	-2.0852
YMR201C	RAD14	rad14	-0.08922	-1.35964	-0.00504	-0.201732	-0.15595	-2.06837
YNL050C	YNL050C	ynl050c	-0.01753	-0.32362	-0.04488	-0.7334	-0.15587	-2.06736
YOR379C	YOR379C	yor379c	-0.01687	-0.314082	0.04746	0.498884	-0.15565	-2.06458
YDR219C	MFB1	mfb1	-0.05411	-0.852252	-0.12967	-1.86493	-0.15288	-2.02954
YDR269C	YDR269C	ydr269c	0.00147	-0.0490428	-0.01557	-0.342256	-0.15286	-2.02929
YGR007W	ECT1	ect1	-0.00429	-0.132283	0.00136	-0.116324	-0.15132	-2.0098
YPL190C	NAB3	nab3-11	-0.14796	-2.20852	-0.13765	-1.97142	-0.14817	-1.96996
YLR178C	TFS1	tfs1	-0.01211	-0.245293	-0.01784	-0.372549	-0.14754	-1.96199
YLR274W	CDC46	cdc46-1	-0.12556	-1.88481	-0.21079	-2.94748	-0.14746	-1.96098
YHR019C	DED81	ded81-ph	-0.03893	-0.63288	-0.0386	-0.649593	-0.1472	-1.95769
YCR002C	CDC10	cdc10-4	-0.02152	-0.381281	-0.1838	-2.5873	-0.14566	-1.93821
YPL171C	OYE3	oye3	0.00457	-0.00424346	-0.06749	-1.03513	-0.14351	-1.91101
YBR160W	CDC28	cdc28-td	-0.13208	-1.97903	-0.13357	-1.91697	-0.14302	-1.90481
YAL034C	FUN19	fun19	-0.03635	-0.595595	-0.0581	-0.909821	-0.14237	-1.89659
YJL090C	DPB11	dpb11-1	-0.06393	-0.994165	-0.12229	-1.76644	-0.14036	-1.87116
YMR291W	TDA1	tda1	0.02219	0.25039	0.02577	0.209429	-0.13869	-1.85004
YPR034W	ARP7	arp7-e411k	-0.02925	-0.49299	-0.12965	-1.86466	-0.13748	-1.83473
YKL094W	YJU3	yju3	0.17993	2.52996	0.08327	0.97677	-0.13675	-1.82549
YBR198C	TAF5	taf5-15	-0.16808	-2.49928	-0.23459	-3.26509	-0.13623	-1.81892
YPR181C	SEC23	sec23-1	-0.01504	-0.287636	-0.01531	-0.338786	-0.13546	-1.80918
YDL006W	PTC1	ptc1	-0.07115	-1.0985	-0.1487	-2.11888	-0.134	-1.79071
YML114C	TAF8	taf8-7	-0.05768	-0.903844	-0.2023	-2.83418	-0.13097	-1.75238
YJL039C	NUP192	nup192-15	0.00064	-0.0610375	0.02199	0.158985	-0.13017	-1.74226
YOR247W	SRL1	srl1	0.03756	0.472508	0.01923	0.122152	-0.13003	-1.74049
YPL247C	YPL247C	ypl247c	-0.05722	-0.897196	-0.02714	-0.496658	-0.12994	-1.73935
YFL020C	PAU5	pau5	-0.03816	-0.621752	-0.11245	-1.63513	-0.12696	-1.70165
YHR101C	BIG1	big1-ph	0.05729	0.757635	0.05603	0.613251	-0.12526	-1.68015
YLR278C	YLR278C	ylr278c	-0.02994	-0.502962	-0.03038	-0.539896	-0.12398	-1.66395
YOR359W	VTS1	vts1	0.00998	0.0739387	0.02502	0.19942	-0.12379	-1.66155
YLR407W	YLR407W	ylr407w	-0.00775	-0.182285	-0.05589	-0.880329	-0.12337	-1.65624
YIL126W	STH1	sth1-2	0.07367	0.994349	-0.14811	-2.11101	-0.1231	-1.65282
YFL034C-B	MOB2	mob2-8	-0.04527	-0.724502	0.1074	1.29879	-0.12304	-1.65206
YPR161C	SGV1	sgv1-23	-0.06695	-1.03781	0.07529	0.870277	-0.12234	-1.64321
YBR080C	SEC18	sec18-1	-0.03276	-0.543715	-0.04654	-0.755553	-0.122	-1.63891
YGL136C	MRM2	mrm2	0.381	5.4357	-0.05765	-0.903816	-0.12161	-1.63397
YJL097W	PHS1	phs1-ph	-0.07626	-1.17235	-0.00936	-0.259383	-0.12091	-1.62512
YJL120W	YJL120W	yjl120w	-0.0575	-0.901242	0.02129	0.149643	-0.12085	-1.62436
YGR179C	OKP1	okp1-5	-0.00601	-0.157139	-0.04394	-0.720855	-0.12043	-1.61905
YFR051C	RET2	ret2-1	-0.02704	-0.461052	-0.02322	-0.444346	-0.11966	-1.60931
YFR036W	CDC26	cdc26-1	8e-05	-0.0691303	-0.00351	-0.181314	-0.1185	-1.59463
YCR002C	CDC10	cdc10-5	0.09061	1.23916	-0.06127	-0.952125	-0.11616	-1.56503
YGL237C	HAP2	hap2	0.04085	0.520054	0.02671	0.221973	-0.11364	-1.53315
YML016C	PPZ1	ppz1	0.00475	-0.00164221	0.11044	1.33936	-0.11353	-1.53176
YJL194W	CDC6	cdc6-1	-0.08302	-1.27004	-0.15028	-2.13997	-0.11352	-1.53164
YIL144W	TID3	tid3-1	-0.00014	-0.0723096	-0.12335	-1.78059	-0.11111	-1.50115
YPL159C	PET20	pet20	-0.0342	-0.564525	0.02551	0.205959	-0.11087	-1.49811
YDR361C	BCP1	bcp1-ts	0.16889	2.37041	0.27268	3.50446	-0.11021	-1.48976
YMR012W	CLU1	clu1	-0.07213	-1.11267	-0.05382	-0.852705	-0.10851	-1.46826
YFR028C	CDC14	cdc14-2	-0.04823	-0.767278	-0.10642	-1.55465	-0.10818	-1.46408
YBR111C	YSA1	ysa1	-0.15947	-2.37485	0.16562	2.07574	-0.10814	-1.46358
YPL209C	IPL1	ipl1-1	0.0701	0.942757	0.01912	0.120684	-0.10758	-1.45649
YOR220W	RCN2	rcn2	0.00304	-0.0263541	-0.01971	-0.397504	-0.10745	-1.45485
YLR083C	EMP70	emp70	-0.05862	-0.917428	-0.04817	-0.777305	-0.10737	-1.45384
YLR428C	YLR428C	ylr428c	-0.0076	-0.180117	-0.00869	-0.250442	-0.10689	-1.44777
YGR037C	ACB1	acb1	-0.00559	-0.15107	0.02041	0.1379	-0.10651	-1.44296
YBL034C	STU1	stu1-6	-0.04686	-0.747479	0.01156	0.0197957	-0.10511	-1.42525
YLR418C	CDC73	cdc73	-0.24182	-3.56493	-0.31227	-4.30174	-0.10477	-1.42095
YCR002C	CDC10	cdc10-1	-0.10858	-1.63942	-0.24454	-3.39788	-0.1047	-1.42006
YNL010W	YNL010W	ynl010w	-0.02289	-0.401079	-0.12825	-1.84598	-0.10468	-1.41981
YHR036W	BRL1	brl1-3231	-0.09466	-1.43826	-0.07323	-1.11173	-0.10416	-1.41323
YNL004W	HRB1	hrb1	-0.10031	-1.51991	-0.12591	-1.81475	-0.10414	-1.41298
YPL263C	KEL3	kel3	-0.04878	-0.775226	-0.06858	-1.04968	-0.10397	-1.41083
YDR084C	TVP23	tvp23	-0.00924	-0.203817	0.03042	0.271484	-0.10391	-1.41007
YFL034C-B	MOB2	mob2-19	0.13457	1.87444	0.11297	1.37312	-0.10385	-1.40931
YMR266W	RSN1	rsn1	0.0062	0.0193123	0.00051	-0.127667	-0.10358	-1.40589
YDR107C	TMN2	tmn2	0.00416	-0.0101685	-0.00899	-0.254445	-0.10354	-1.40539
YHR024C	MAS2	mas2-10	-0.05454	-0.858466	-0.05212	-0.830018	-0.10342	-1.40387
YNL102W	POL1	pol1-17	-0.06259	-0.9748	-0.10999	-1.6023	-0.1031	-1.39982
YDR444W	YDR444W	ydr444w	-0.02963	-0.498482	-0.03267	-0.570456	-0.10266	-1.39426
YMR037C	MSN2	msn2	-0.07754	-1.19085	-0.08899	-1.32205	-0.10249	-1.39211
YBR176W	ECM31	ecm31	0.04907	0.638844	-0.0333	-0.578864	-0.10198	-1.38565
YLR314C	CDC3	cdc3-3	-0.10426	-1.57699	-0.05155	-0.822411	-0.10183	-1.38376
YKL023W	YKL023W	ykl023w	-0.03061	-0.512644	0.05089	0.544657	-0.10152	-1.37984
YNL034W	YNL034W	ynl034w	0.02082	0.230592	-0.03431	-0.592342	-0.10121	-1.37591
YDR121W	DPB4	dpb4	-0.0365	-0.597763	0.06258	0.700661	-0.10052	-1.36719
YJR065C	ARP3	arp3-g15c	-0.04985	-0.790689	0.20806	2.6421	-0.09974	-1.35732
YDR210W	YDR210W	ydr210w	-0.0015	-0.0919635	-0.0046	-0.195861	-0.09953	-1.35466
YIL104C	SHQ1	shq1-ph	-0.0357	-0.586202	-0.06372	-0.984821	-0.09921	-1.35061
YDL102W	CDC2	cdc2-1	-0.12441	-1.86819	-0.17912	-2.52484	-0.09842	-1.34062
YOR162C	YRR1	yrr1	-0.01596	-0.300931	-0.06924	-1.05849	-0.09771	-1.33164
YFL008W	SMC1	smc1-2	-0.1169	-1.75966	-0.02067	-0.410316	-0.09769	-1.33139
YOR262W	YOR262W	yor262w-ph	-0.25122	-3.70077	-0.04479	-0.732199	-0.09746	-1.32848
YGL120C	PRP43	prp43-ts2	-0.50969	-7.43602	-0.22377	-3.1207	-0.09672	-1.31912
YKR008W	RSC4	rsc4-2	-0.04585	-0.732883	-0.04204	-0.6955	-0.09646	-1.31583
YCL059C	KRR1	krr1-18	0.04815	0.625549	0.08706	1.02735	-0.09524	-1.30039
YLR036C	YLR036C	ylr036c	-0.04312	-0.693431	-0.02111	-0.416188	-0.0947	-1.29356
YKR086W	PRP16	prp16-2	0.02691	0.318601	0.00838	-0.0226416	-0.09455	-1.29166
YDL043C	PRP11	prp11-ts	-0.01401	-0.272751	0.05951	0.659692	-0.0945	-1.29103
YHR166C	CDC23	cdc23-1	-0.12812	-1.9218	-0.07022	-1.07156	-0.09374	-1.28142
YDL028C	MPS1	mps1-417	-0.00073	-0.0808359	-0.21168	-2.95936	-0.09335	-1.27648
YDR478W	SNM1	snm1-ph	-0.13763	-2.05923	-0.09947	-1.46191	-0.09329	-1.27573
YOR377W	ATF1	atf1	-0.03703	-0.605422	0.00733	-0.0366539	-0.09321	-1.27471
YJR076C	CDC11	cdc11-1	-0.06013	-0.93925	-0.10886	-1.58722	-0.09316	-1.27408
YDR151C	CTH1	cth1	-0.01173	-0.239801	-0.0372	-0.63091	-0.09315	-1.27395
YLR413W	YLR413W	ylr413w	-0.06676	-1.03506	-0.07787	-1.17365	-0.09238	-1.26421
YOL095C	HMI1	hmi1	-0.05817	-0.910925	-0.04782	-0.772634	-0.092	-1.25941
YNR074C	AIF1	aif1	0.00096	-0.056413	-0.04502	-0.735268	-0.0918	-1.25688
YHR118C	ORC6	orc6-ph	-0.12452	-1.86978	-0.09871	-1.45176	-0.09121	-1.24941
YLL020C	YLL020C	yll020c	0.01468	0.14186	0.04919	0.52197	-0.09116	-1.24878
YCL009C	ILV6	ilv6	-0.02561	-0.440387	-0.00533	-0.205602	-0.09106	-1.24752
YPL233W	NSL1	nsl1-5	0.01453	0.139693	-0.0306	-0.542832	-0.09002	-1.23436
YDR061W	YDR061W	ydr061w	-0.02245	-0.394721	0.05553	0.606578	-0.09002	-1.23436
YBR079C	RPG1	rpg1-1	-0.01547	-0.29385	-0.01042	-0.273529	-0.08992	-1.2331
YOR314W	YOR314W	yor314w	0.01997	0.218308	0.01036	0.00378165	-0.08979	-1.23145
YBL034C	STU1	stu1-8	-0.13991	-2.09218	-0.15385	-2.18761	-0.08925	-1.22462
YMR235C	RNA1	rna1-1	-0.07641	-1.17452	-0.23794	-3.3098	-0.08909	-1.2226
YMR060C	SAM37	sam37	-0.10783	-1.62858	-0.06538	-1.00697	-0.08894	-1.2207
YMR290C	HAS1	has1-ph	-0.01115	-0.23142	-0.01389	-0.319836	-0.08783	-1.20666
YDR285W	ZIP1	zip1	-0.02786	-0.472903	0.00947	-0.00809546	-0.08756	-1.20324
YCR089W	FIG2	fig2	0.0235	0.269322	-0.0216	-0.422727	-0.08601	-1.18363
YHR065C	YHR065C	yhr065c-ph	-0.03861	-0.628255	-0.14025	-2.00612	-0.08587	-1.18186
YPR161C	SGV1	sgv1-35	-0.08147	-1.24764	-0.10103	-1.48273	-0.08584	-1.18148
YOR024W	YOR024W	yor024w	-0.03273	-0.543281	-0.01809	-0.375885	-0.08584	-1.18148
YLR430W	SEN1	sen1-1	0.014	0.132033	-0.02879	-0.518678	-0.08579	-1.18085
YKL129C	MYO3	myo3	0.01628	0.164983	-0.00218	-0.163565	-0.08559	-1.17832
YFL034C-B	MOB2	mob2-24	0.00113	-0.0539563	0.11395	1.3862	-0.08525	-1.17402
YLR276C	DBP9	dbp9-ph	-0.01268	-0.25353	-0.07667	-1.15764	-0.08507	-1.17174
YJR110W	YMR1	ymr1	-0.06796	-1.0524	-0.09482	-1.39985	-0.08496	-1.17035
YML013W	UBX2	ubx2	-0.06253	-0.973933	0.03257	0.300176	-0.08471	-1.16719
YKR040C	YKR040C	ykr040c	0.04575	0.590866	0.01866	0.114546	-0.08456	-1.16529
YFL045C	SEC53	sec53-6	0.0087	0.0554409	0.01222	0.0286035	-0.08454	-1.16504
YBR060C	ORC2	orc2-2	-0.12555	-1.88466	-0.14582	-2.08045	-0.08437	-1.16289
YML069W	POB3	pob3-7	0.03003	0.363689	-0.05562	-0.876726	-0.08417	-1.16036
YMR245W	YMR245W	ymr245w	-0.04888	-0.776671	0.09999	1.1999	-0.08402	-1.15846
YMR044W	IOC4	ioc4	0.01314	0.119605	-0.02304	-0.441943	-0.08379	-1.15555
YGL155W	CDC43	cdc43-2	-0.02298	-0.40238	-0.08897	-1.32178	-0.0835	-1.15188
YLR303W	MET17	met17	0.02709	0.321202	-0.04279	-0.705509	-0.08341	-1.15074
YKL033W	YKL033W	ykl033w-a	-0.00677	-0.168122	0.01008	4.50338e-05	-0.08331	-1.14948
YLL041C	SDH2	sdh2	-0.44666	-6.52515	-0.07107	-1.08291	-0.08314	-1.14733
YGL045W	YGL046W	ygl046w	-0.06844	-1.05934	-0.19334	-2.71461	-0.0825	-1.13923
YGL021W	ALK1	alk1	0.01587	0.159057	-0.01327	-0.311562	-0.08248	-1.13898
YFR005C	SAD1	sad1-1	-0.06017	-0.939828	-0.04906	-0.789182	-0.08217	-1.13506
YLR194C	YLR194C	ylr194c	-0.06663	-1.03318	-0.08069	-1.21129	-0.08196	-1.1324
YJR154W	YJR154W	yjr154w	-0.03455	-0.569583	-0.0356	-0.609557	-0.08154	-1.12709
YBR231C	SWC5	swc5	0.07515	1.01574	-0.04512	-0.736603	-0.08146	-1.12608
YDR212W	TCP1	tcp1-1	-0.11806	-1.77642	-0.11165	-1.62445	-0.08145	-1.12595
YKL156W	RPS27A	rps27a	-0.05697	-0.893583	-0.07713	-1.16378	-0.08124	-1.12329
YFL034C-B	MOB2	mob2-40	0.05525	0.728154	0.07538	0.871478	-0.0812	-1.12279
YGR113W	DAM1	dam1-11	-0.03983	-0.645886	-0.09391	-1.38771	-0.08103	-1.12064
YIL106W	YIL106W	yil106w-ph	0.08185	1.11256	0.07315	0.841718	-0.08095	-1.11962
YNL143C	YNL143C	ynl143c	0.00556	0.0100634	0.0012	-0.118459	-0.08082	-1.11798
YBR153W	RIB7	rib7-ph	-0.0064	-0.162775	-0.04102	-0.681888	-0.08068	-1.11621
YIR031C	DAL7	dal7	-0.05954	-0.930723	-0.0623	-0.965871	-0.08054	-1.11444
YNL032W	SIW14	siw14	0.0011	-0.0543898	0.08513	1.00159	-0.08046	-1.11343
YCL059C	KRR1	krr1-17	-0.1304	-1.95475	-0.02862	-0.516409	-0.08031	-1.11153
YJR006W	POL31	pol31-ph	-0.25491	-3.75409	-0.25694	-3.56335	-0.08029	-1.11128
YPR168W	NUT2	nut2-ts	-0.01278	-0.254975	0.00874	-0.0178374	-0.08013	-1.10925
YGR047C	YGR047C	ygr047c-ph	-0.03832	-0.624064	-0.07727	-1.16565	-0.07989	-1.10622
YGL142C	GPI10	gpi10-ph	0.02225	0.251257	0.03812	0.374241	-0.07954	-1.10179
YMR168C	CEP3	cep3-2	0.01957	0.212528	-0.11636	-1.6873	-0.0792	-1.09749
YGR129W	SYF2	syf2	-0.00812	-0.187632	-0.03335	-0.579531	-0.07892	-1.09395
YDL008W	APC11	apc11-13	-0.09806	-1.48739	-0.05802	-0.908754	-0.07798	-1.08205
YNL120C	YNL120C	ynl120c	-0.13888	-2.0773	-0.00882	-0.252177	-0.07764	-1.07775
YHR110W	ERP5	erp5	0.00521	0.00500544	-0.0661	-1.01658	-0.07751	-1.07611
YHR154W	RTT107	rtt107	-0.02553	-0.439231	0.06415	0.721613	-0.07726	-1.07295
YKL043W	PHD1	phd1	-0.04252	-0.68476	-0.11127	-1.61938	-0.07702	-1.06991
YMR213W	CEF1	cef1-13	0.01919	0.207036	-0.00594	-0.213743	-0.07672	-1.06612
YCR052W	RSC6	rsc6-ph	-0.08442	-1.29027	-0.13637	-1.95434	-0.07655	-1.06397
YLR268W	SEC22	sec22-3	-0.00166	-0.0942757	0.0665	0.752974	-0.0759	-1.05574
YPL228W	CET1	cet1-2	-0.07187	-1.10891	-0.04183	-0.692697	-0.07558	-1.05169
YDR340W	YDR340W	ydr340w	-0.01651	-0.308879	-0.01531	-0.338786	-0.07557	-1.05157
YLR326W	YLR326W	ylr326w	-0.07018	-1.08449	-0.02801	-0.508268	-0.0754	-1.04942
YPL157W	TGS1	tgs1	-0.0286	-0.483597	-0.01297	-0.307559	-0.07516	-1.04638
YOL007C	CSI2	csi2	0.00662	0.0253819	-0.03159	-0.556044	-0.07515	-1.04626
YDR088C	SLU7	slu7-ts2	-0.04596	-0.734473	-0.00436	-0.192658	-0.07509	-1.0455
YKR024C	DBP7	dbp7	-0.08029	-1.23059	0.00046	-0.128334	-0.07494	-1.0436
YPL169C	MEX67	mex67-ts5	0.02824	0.337821	0.05582	0.610448	-0.07492	-1.04335
YOR078W	BUD21	bud21	0.03727	0.468318	0.11838	1.44532	-0.07474	-1.04107
YOL101C	IZH4	izh4	-0.01715	-0.318128	-0.01211	-0.296082	-0.07449	-1.03791
YOR301W	RAX1	rax1	-0.02043	-0.365529	0.03497	0.332204	-0.07433	-1.03588
YML041C	VPS71	vps71	-0.068155	-1.05522	-0.107475	-1.56873	-0.07431	-1.03563
YNR073C	YNR073C	ynr073c	-0.05009	-0.794157	-0.01734	-0.365877	-0.07431	-1.03563
YCR071C	IMG2	img2	-0.08333	-1.27452	0.01376	0.0491549	-0.07416	-1.03373
YDR394W	RPT3	rpt3-1	-0.01986	-0.357291	-0.1392	-1.99211	-0.07412	-1.03323
YPL228W	CET1	cet1-1	-0.1264	-1.89694	-0.06928	-1.05902	-0.0738	-1.02918
YOL021C	DIS3	dis3-1	-0.02269	-0.398189	-0.10329	-1.51288	-0.07378	-1.02892
YDL024C	DIA3	dia3	-0.05387	-0.848784	-0.06014	-0.937045	-0.07366	-1.02741
YAL018C	YAL018C	yal018c	-0.0435	-0.698923	-0.02846	-0.514274	-0.07363	-1.02703
YFR037C	RSC8	rsc8-ts21	0.02621	0.308485	-0.0572	-0.897811	-0.07361	-1.02677
YKR031C	SPO14	spo14	-0.00898	-0.20006	0.03545	0.338609	-0.07351	-1.02551
YNL046W	YNL046W	ynl046w	0.0204	0.224522	0.15597	1.94696	-0.0735	-1.02538
YNL008C	ASI3	asi3	-0.12559	-1.88524	-0.05715	-0.897144	-0.07312	-1.02058
YDL102W	CDC2	cdc2-7	0.00853	0.0529841	-0.01423	-0.324373	-0.07307	-1.01994
YPL092W	SSU1	ssu1	-0.01894	-0.343996	-0.01258	-0.302354	-0.07277	-1.01615
YNL003C	PET8	pet8	-0.06219	-0.969019	-0.03989	-0.666808	-0.07266	-1.01476
YKL218C	SRY1	sry1	-0.04783	-0.761497	-0.05634	-0.886334	-0.07244	-1.01197
YIL140W	AXL2	axl2	-0.00695	-0.170724	-0.03307	-0.575794	-0.0724	-1.01147
YLR315W	NKP2	nkp2	-0.03335	-0.552241	-0.10354	-1.51622	-0.07239	-1.01134
YJR112W	NNF1	nnf1-77	0.0339	0.419616	0.06387	0.717876	-0.07226	-1.0097
YDL103C	QRI1	qri1-ts1	-0.07043	-1.0881	0.06629	0.750171	-0.07207	-1.00729
YGL022W	STT3	stt3-7	-0.02147	-0.380558	-0.10523	-1.53877	-0.07178	-1.00362
YJL141C	YAK1	yak1	0.02054	0.226546	0.03777	0.36957	-0.07125	-0.99692
YPL219W	PCL8	pcl8	-0.04857	-0.772191	-0.05453	-0.86218	-0.07103	-0.994137
YDL098C	SNU23	snu23-ph	0.04859	0.631908	0.06879	0.783534	-0.07093	-0.992872
YDL222C	FMP45	fmp45	-0.00605	-0.157717	-0.0731	-1.11	-0.0708	-0.991228
YFL034C-B	MOB2	mob2-14	0.04907	0.638844	0.10887	1.3184	-0.07046	-0.986927
YIL057C	RGI2	rgi2	-0.01896	-0.344285	0.01501	0.0658362	-0.07037	-0.985788
YKR018C	YKR018C	ykr018c	-0.02012	-0.361049	0.01576	0.075845	-0.07031	-0.985029
YLR115W	CFT2	cft2-1	-0.06024	-0.940839	0.04345	0.44537	-0.07028	-0.98465
YGR182C	YGR182C	ygr182c	-0.07156	-1.10443	-0.00933	-0.258983	-0.07014	-0.982879
YOR265W	RBL2	rbl2	-0.06157	-0.96006	-0.01561	-0.34279	-0.07007	-0.981993
YDL102W	CDC2	cdc2-2	-0.10913	-1.64737	-0.05119	-0.817607	-0.07004	-0.981614
YFR028C	CDC14	cdc14-1	-0.04989	-0.791267	-0.14015	-2.00478	-0.06991	-0.979969
YJL203W	PRP21	prp21-ts	-0.04345	-0.6982	0.02735	0.230514	-0.06899	-0.968331
YDL028C	MPS1	mps1-3796	0.01944	0.210649	-0.08508	-1.26987	-0.06891	-0.967319
YLR163C	MAS1	mas1-1	0.00481	-0.000775121	-0.09204	-1.36275	-0.06873	-0.965042
YDR099W	BMH2	bmh2	0.00556	0.0100634	-0.01223	-0.297683	-0.06865	-0.96403
YML035C	YML035C	yml035c-a	-0.01907	-0.345875	0.01974	0.128958	-0.06804	-0.956314
YMR020W	FMS1	fms1	-0.02082	-0.371165	-0.00612	-0.216145	-0.06802	-0.956061
YML037C	YML037C	yml037c	-0.04184	-0.674933	-0.02022	-0.40431	-0.06799	-0.955681
YPL259C	APM1	apm1	-0.07148	-1.10327	-0.07182	-1.09292	-0.06797	-0.955428
YHR036W	BRL1	brl1-2221	-0.062	-0.966274	-0.04813	-0.776771	-0.06786	-0.954037
YKR102W	FLO10	flo10	-0.04583	-0.732594	-0.07409	-1.12321	-0.0677	-0.952013
YJR057W	CDC8	cdc8-2	0.08094	1.09941	0.03261	0.300709	-0.06749	-0.949356
YDL003W	MCD1	mcd1-73	-0.03657	-0.598774	-0.05182	-0.826014	-0.06722	-0.945941
YGR078C	PAC10	pac10	-0.0031	-0.115086	0.04737	0.497682	-0.06688	-0.94164
YDR045C	RPC11	rpc11-ph	-0.04348	-0.698634	0.01542	0.0713077	-0.0666	-0.938098
YLR197W	NOP56	nop56-ph	0.03412	0.422796	0.00864	-0.0191719	-0.06655	-0.937465
YBL084C	CDC27	cdc27-1	-0.01892	-0.343707	-0.04311	-0.709779	-0.06646	-0.936327
YGL137W	SEC27	sec27-1	-0.00661	-0.16581	-0.01851	-0.38149	-0.06642	-0.935821
YFL034C-B	MOB2	mob2-34	0.00052	-0.0627717	0.09591	1.14545	-0.06639	-0.935441
YKR055W	RHO4	rho4	-0.06096	-0.951244	-0.07375	-1.11867	-0.06638	-0.935315
YGR091W	PRP31	prp31-ts	0.1188	1.64654	0.1582	1.97672	-0.06625	-0.93367
YNL144C	YNL144C	ynl144c	0.0005	-0.0630607	0.02928	0.25627	-0.06623	-0.933417
YPL160W	CDC60	cdc60-ts	-0.06393	-0.994165	-0.01289	-0.306491	-0.06597	-0.930128
YGR268C	HUA1	hua1	-0.07253	-1.11845	-0.01032	-0.272194	-0.06593	-0.929622
YNL140C	YNL140C	ynl140c	-0.10268	-1.55416	0.0226	0.167125	-0.06588	-0.92899
YJL035C	TAD2	tad2-ph	-0.05452	-0.858177	-0.0465	-0.755019	-0.0658	-0.927978
YPL119C	DBP1	dbp1	-0.02317	-0.405126	-0.00027	-0.138076	-0.06575	-0.927345
YGL105W	ARC1	arc1	-0.00628	-0.161041	0.12334	1.51151	-0.06529	-0.921526
YOR223W	YOR223W	yor223w	-0.0151	-0.288503	-0.03872	-0.651194	-0.0651	-0.919123
YGR140W	CBF2	cbf2-2	-0.0233	-0.407004	-0.14508	-2.07058	-0.06502	-0.918111
YFL009W	CDC4	cdc4-3	-0.03816	-0.621752	-0.00151	-0.154624	-0.06497	-0.917478
YOR001W	RRP6	rrp6	3e-05	-0.0698529	0.00504	-0.0672141	-0.06487	-0.916213
YNL051W	COG5	cog5	0.00887	0.0578976	0.03401	0.319392	-0.06482	-0.915581
YML069W	POB3	pob3-l78r	0.00817	0.0477816	-0.00782	-0.238832	-0.06477	-0.914948
YLR099C	ICT1	ict1	-0.03646	-0.597185	-0.02129	-0.41859	-0.06454	-0.912039
YDR182W	CDC1	cdc1-1	-0.06428	-0.999223	-0.09037	-1.34047	-0.06436	-0.909762
YLR195C	NMT1	nmt1-181	0.13857	1.93225	-0.04646	-0.754485	-0.06427	-0.908623
YOR254C	SEC63	sec63-1	0.06594	0.882639	0.07056	0.807155	-0.06419	-0.907611
YDR015C	YDR015C	ydr015c	-0.05967	-0.932602	-0.04077	-0.678551	-0.06412	-0.906726
YLL026W	HSP104	hsp104	-0.09592	-1.45647	0.0019	-0.109118	-0.06375	-0.902045
YDR093W	DNF2	dnf2	-0.02985	-0.501661	-0.02368	-0.450484	-0.06324	-0.895594
YPL216W	YPL216W	ypl216w	-0.02451	-0.42449	-0.02223	-0.431134	-0.06309	-0.893696
YMR172C	YMR172C	ymr172c-a	-0.02595	-0.4453	-0.03588	-0.613294	-0.06296	-0.892052
YGR079W	YGR079W	ygr079w	-0.00701	-0.171591	-0.05658	-0.889537	-0.06262	-0.887751
YPL047W	SGF11	sgf11	-0.007895	-0.18438	-0.12103	-1.74963	-0.062605	-0.887561
YOR194C	TOA1	toa1-ph	-0.22489	-3.32026	-0.11222	-1.63206	-0.06236	-0.884462
YBL084C	CDC27	cdc27-2	0.03675	0.460803	-0.02325	-0.444746	-0.06233	-0.884082
YPL223C	GRE1	gre1	0.02244	0.254003	0.00285	-0.0964398	-0.06228	-0.88345
YJR112W	NNF1	nnf1-48	-0.06304	-0.981303	-0.07593	-1.14776	-0.06219	-0.882311
YJL091C	GWT1	gwt1-20	-0.04313	-0.693576	0.02011	0.133896	-0.06219	-0.882311
YMR258C	ROY1	roy1	0.00232	-0.0367591	0.01931	0.12322	-0.06217	-0.882058
YDR243C	PRP28	prp28-101	-0.10449	-1.58031	-0.06368	-0.984287	-0.06214	-0.881679
YLL012W	YEH1	yeh1	-0.02119	-0.376512	-0.04931	-0.792518	-0.0621	-0.881173
YDR536W	STL1	stl1	-0.01176	-0.240235	-0.01814	-0.376553	-0.06176	-0.876872
YOR276W	CAF20	caf20	-0.04841	-0.769879	6e-05	-0.133673	-0.06176	-0.876872
YGL101W	YGL101W	ygl101w	-0.03157	-0.526517	-0.16272	-2.30598	-0.06166	-0.875607
YOR246C	ENV9	env9	0.01948	0.211227	0.02801	0.239322	-0.06161	-0.874974
YDR284C	DPP1	dpp1	-0.00716	-0.173758	-0.04922	-0.791317	-0.06134	-0.871559
YLR097C	HRT3	hrt3	-0.05474	-0.861356	-0.04338	-0.713382	-0.06119	-0.869661
YJR129C	YJR129C	yjr129c	-0.02693	-0.459463	-0.06694	-1.02779	-0.06115	-0.869155
YDR067C	OCA6	oca6	-0.05575	-0.875952	-0.00068	-0.143548	-0.06114	-0.869029
YDR416W	YDR416W	ydr416w-ph	-0.00421	-0.131127	0.05938	0.657957	-0.06102	-0.867511
YLR440C	SEC39	sec39-1	-0.02619	-0.448769	0.03525	0.33594	-0.06096	-0.866752
YGL116W	CDC20	cdc20-3	0.07121	0.958798	-0.06804	-1.04247	-0.06091	-0.866119
YKL066W	YKL066W	ykl066w	-0.00282	-0.111039	0.00736	-0.0362535	-0.06065	-0.86283
YLL056C	YLL056C	yll056c	-0.04337	-0.697044	-0.08923	-1.32525	-0.0605	-0.860933
YAL041W	CDC24	cdc24-1	-0.02702	-0.460763	0.0044	-0.0757549	-0.06048	-0.86068
YOR383C	FIT3	fit3	-0.01351	-0.265525	-0.05191	-0.827215	-0.06036	-0.859162
YIL150C	MCM10	mcm10-1	-0.09457	-1.43696	0.05044	0.538652	-0.06032	-0.858656
YKL179C	COY1	coy1	-0.04809	-0.765255	-0.04527	-0.738604	-0.0603	-0.858403
YJL001W	PRE3	pre3-2	0.04233	0.541442	-0.01489	-0.333181	-0.06024	-0.857644
YIL165C	YIL165C	yil165c	-0.05908	-0.924076	-0.04589	-0.746878	-0.06023	-0.857517
YJR030C	YJR030C	yjr030c	-0.02068	-0.369142	-0.01218	-0.297016	-0.06021	-0.857264
YJR103W	URA8	ura8	0.01027	0.0781296	-0.00809	-0.242435	-0.06017	-0.856758
YDR163W	CWC15	cwc15	-0.04366	-0.701235	0.04576	0.476197	-0.06009	-0.855746
YHR097C	YHR097C	yhr097c	-0.02461	-0.425936	-0.02376	-0.451552	-0.05988	-0.85309
YPL172C	COX10	cox10	-0.0285	-0.482152	0.02037	0.137366	-0.05978	-0.851825
YKL150W	MCR1	mcr1	-0.03318	-0.549784	-0.03601	-0.615029	-0.05974	-0.851319
YBL039C	URA7	ura7	-0.02576	-0.442555	-0.05448	-0.861512	-0.0597	-0.850813
YPR138C	MEP3	mep3	0.0043	-0.00814534	0.00233	-0.103379	-0.05962	-0.849801
YAR031W	PRM9	prm9	0.06099	0.811105	0.07086	0.811158	-0.05958	-0.849295
YPL209C	IPL1	ipl1-2	-0.05113	-0.809187	-0.04763	-0.770099	-0.05943	-0.847397
YBR160W	CDC28	cdc28-13	0.00092	-0.0569911	0.14437	1.79215	-0.05933	-0.846132
YKR082W	NUP133	nup133	-0.025995	-0.445951	-0.011585	-0.289076	-0.0591	-0.843223
YOR275C	RIM20	rim20	-0.0571	-0.895462	-0.17604	-2.48374	-0.05904	-0.842464
YCR053W	THR4	thr4	-0.09052	-1.37843	-0.12354	-1.78312	-0.05896	-0.841452
YKL201C	YKL200C	ykl200c	-0.02425	-0.420733	-0.03364	-0.583401	-0.05884	-0.839934
YMR063W	RIM9	rim9	-0.02404	-0.417698	-0.13559	-1.94393	-0.05877	-0.839048
YPR011C	YPR011C	ypr011c	-0.00717	-0.173903	0.05028	0.536517	-0.0584	-0.834368
YGL219C	MDM34	mdm34	0.027415	0.325899	0.044545	0.459983	-0.05827	-0.832723
YOR251C	TUM1	tum1	-0.04008	-0.649499	0.00099	-0.121262	-0.05808	-0.83032
YOR269W	PAC1	pac1	-0.02861	-0.483741	0.02269	0.168326	-0.05791	-0.828169
YOR204W	DED1	ded1-95	0.00255	-0.0334353	0.03376	0.316056	-0.05788	-0.82779
YBR156C	SLI15	sli15-3	-0.03413	-0.563513	-0.05749	-0.901681	-0.05781	-0.826904
YKL021C	MAK11	mak11-2	0.01589	0.159346	-0.00475	-0.197862	-0.05774	-0.826019
YER183C	FAU1	fau1	-0.04867	-0.773636	-0.09281	-1.37303	-0.05754	-0.823489
YMR236W	TAF9	taf9-ts2	-0.09834	-1.49144	-0.0694	-1.06062	-0.05746	-0.822477
YFL039C	ACT1	act1-136	0.03612	0.451698	-0.02944	-0.527352	-0.05734	-0.820959
YOL085C	YOL085C	yol085c	-0.04857	-0.772191	-0.05877	-0.918763	-0.05699	-0.816531
YIL164C	NIT1	nit1	-0.0294	-0.495158	0.01785	0.103736	-0.05699	-0.816531
YDR013W	PSF1	psf1-1	-0.11835	-1.78061	-0.01656	-0.355467	-0.05696	-0.816152
YDR303C	RSC3	rsc3-1	-0.00948	-0.207286	-0.08198	-1.2285	-0.05686	-0.814887
YOR047C	STD1	std1	-0.00182	-0.096588	-0.09537	-1.40719	-0.05667	-0.812483
YMR240C	CUS1	cus1-3	-0.01258	-0.252085	-0.05959	-0.929706	-0.05658	-0.811345
YMR253C	YMR253C	ymr253c	-0.00525	-0.146156	-0.02411	-0.456223	-0.05651	-0.810459
YOR151C	RPB2	rpb2-6	-0.03695	-0.604266	0.09049	1.07312	-0.05651	-0.810459
YLL005C	SPO75	spo75	0.00766	0.0404114	-0.04355	-0.715651	-0.05643	-0.809447
YLR045C	STU2	stu2-13	0.00399	-0.0126253	0.07173	0.822768	-0.05639	-0.808941
YBR202W	CDC47	cdc47-ts	0.00296	-0.0275102	-0.02478	-0.465164	-0.05631	-0.807929
YJL193W	YJL193W	yjl193w	-0.01069	-0.224772	-0.00583	-0.212275	-0.05614	-0.805779
YGL116W	CDC20	cdc20-1	-0.0655	-1.01685	-0.09997	-1.46858	-0.05588	-0.80249
YFR040W	SAP155	sap155	0.01404	0.132611	0.00907	-0.0134335	-0.05558	-0.798695
YNL066W	SUN4	sun4	-0.01663	-0.310613	-0.08164	-1.22396	-0.05554	-0.798189
YDR117C	TMA64	tma64	-0.08083	-1.23839	-0.03621	-0.617698	-0.05553	-0.798062
YKL160W	ELF1	elf1	-0.06341	-0.98665	-0.01943	-0.393768	-0.05551	-0.797809
YOL069W	NUF2	nuf2-61	-0.03911	-0.635481	-0.09346	-1.3817	-0.05549	-0.797556
YMR110C	HFD1	hfd1	-0.00928	-0.204395	0.0112	0.0149915	-0.05529	-0.795026
YDR494W	RSM28	rsm28	-0.0269	-0.459029	-0.0406	-0.676283	-0.05507	-0.792243
YDL103C	QRI1	qri1-ph	0.28235	4.01007	0.31334	4.04707	-0.05501	-0.791484
YDR388W	RVS167	rvs167	-0.09736	-1.47728	-0.1062	-1.55172	-0.05493	-0.790472
YMR158C	YMR158C	ymr158c-a	0.02961	0.35762	0.07455	0.860401	-0.05489	-0.789966
YFR035C	YFR035C	yfr035c	0.02884	0.346492	0.05356	0.580288	-0.05476	-0.788322
YDR145W	TAF12	taf12-9	-0.02731	-0.464954	-0.07696	-1.16151	-0.05433	-0.782882
YKL022C	CDC16	cdc16-1	-0.03821	-0.622475	-0.10345	-1.51502	-0.05428	-0.78225
YDL148C	YDL148C	ydl148c-ph	0.0198	0.215851	0.03355	0.313254	-0.05425	-0.78187
YML125C	PGA3	pga3-ph	-0.01602	-0.301798	-0.00189	-0.159695	-0.05398	-0.778455
YKL128C	PMU1	pmu1	-0.02432	-0.421745	-0.06196	-0.961333	-0.05389	-0.777316
YHR069C	RRP4	rrp4-1	-0.10306	-1.55965	-0.07323	-1.11173	-0.05357	-0.773268
YHL039W	EFM1	efm1	-0.05016	-0.795169	-0.02621	-0.484247	-0.05354	-0.772889
YDL191W	RPL35A	rpl35a	-0.00131	-0.0892177	0.08579	1.0104	-0.05309	-0.767196
YLR171W	YLR171W	ylr171w	-0.02899	-0.489233	0.01367	0.0479538	-0.05308	-0.76707
YMR154C	RIM13	rim13	-0.06124	-0.955291	-0.152035	-2.16339	-0.05296	-0.765552
YLR345W	YLR345W	ylr345w	-0.05719	-0.896762	0.00073	-0.124731	-0.05287	-0.764413
YGR098C	ESP1	esp1-1	-0.02569	-0.441543	-0.01166	-0.290077	-0.05284	-0.764034
YLR033W	RSC58	rsc58-ph	-0.00906	-0.201216	-0.0953	-1.40626	-0.05282	-0.763781
YGR140W	CBF2	cbf2-42	-0.02601	-0.446168	-0.02966	-0.530288	-0.05278	-0.763275
YNL102W	POL1	pol1-ts	-0.17567	-2.60897	-0.04099	-0.681487	-0.05258	-0.760745
YLR251W	SYM1	sym1	-0.0438	-0.703258	-0.05166	-0.823879	-0.05255	-0.760365
YPL195W	APL5	apl5	-7e-05	-0.071298	0.01194	0.0248669	-0.05254	-0.760239
YJR153W	PGU1	pgu1	0.06503	0.869489	0.06991	0.79848	-0.05245	-0.7591
YKL020C	SPT23	spt23	0.02429	0.280738	-0.01314	-0.309827	-0.05242	-0.758721
YLR193C	UPS1	ups1	-0.163715	-2.4362	-0.16797	-2.37604	-0.052355	-0.757898
YPR024W	YME1	yme1	-0.14083	-2.10548	-0.13968	-1.99851	-0.05225	-0.75657
YDR254W	CHL4	chl4	-0.04184	-0.674933	-0.06644	-1.02112	-0.05223	-0.756317
YOL004W	SIN3	sin3	-0.12596	-1.89059	0.04516	0.46819	-0.05212	-0.754926
YDL161W	ENT1	ent1	0.00099	-0.0559795	-0.08976	-1.33233	-0.05211	-0.754799
YFL013W	YFL013W	yfl013w-a	-0.05798	-0.908179	-0.01432	-0.325575	-0.05208	-0.75442
YMR167W	MLH1	mlh1	-0.06907	-1.06845	-0.34334	-4.71637	-0.05189	-0.752016
YOL002C	IZH2	izh2	0.00418	-0.00987951	0.00039	-0.129269	-0.05184	-0.751384
YKL091C	YKL091C	ykl091c	-0.02655	-0.453971	-0.08713	-1.29723	-0.05173	-0.749992
YOR075W	UFE1	ufe1-1	0.01605	0.161659	0.00669	-0.0451947	-0.05166	-0.749107
YBL072C	RPS8A	rps8a	0.11629	1.61027	0.17895	2.25363	-0.05152	-0.747336
YLR246W	ERF2	erf2	-0.05744	-0.900375	-0.06497	-1.0015	-0.05149	-0.746956
YMR221C	YMR221C	ymr221c	-0.00105	-0.0854604	-0.04384	-0.719521	-0.05141	-0.745944
YDR131C	YDR131C	ydr131c	-0.06146	-0.95847	-0.0035	-0.181181	-0.05139	-0.745691
YCR020C-A	MAK31	mak31	0.07768	1.0523	0.02715	0.227845	-0.05138	-0.745565
YPL020C	ULP1	ulp1-333	-0.07222	-1.11397	-0.00548	-0.207604	-0.05121	-0.743414
YOR015W	YOR015W	yor015w	-0.03579	-0.587502	-0.02828	-0.511872	-0.05111	-0.742149
YDL234C	GYP7	gyp7	-0.04657	-0.743288	-0.05706	-0.895943	-0.05109	-0.741896
YGL160W	AIM14	aim14	-0.12337	-1.85316	-0.06561	-1.01004	-0.05103	-0.741137
YLR394W	CST9	cst9	-0.1359	-2.03423	0.14065	1.74251	-0.05101	-0.740884
YHR036W	BRL1	brl1-c371s	-0.09757	-1.48031	-0.12688	-1.82769	-0.05099	-0.740631
YDR193W	YDR193W	ydr193w	0.017	0.175388	-0.0043	-0.191857	-0.05086	-0.738987
YHR036W	BRL1	brl1-c371r	-0.1926	-2.85363	-0.19455	-2.73076	-0.05082	-0.738481
YDR052C	DBF4	dbf4-ts	-0.0872	-1.33045	0.06309	0.707467	-0.05067	-0.736583
YLR308W	CDA2	cda2	-0.02166	-0.383304	0.02139	0.150978	-0.05065	-0.73633
YPL062W	YPL062W	ypl062w	0.00373	-0.0163826	0.03494	0.331803	-0.05064	-0.736204
YGR274C	TAF1	taf1-1	-0.02879	-0.486342	-0.0729	-1.10733	-0.05048	-0.73418
YHL031C	GOS1	gos1	0.03575	0.446351	0.0539	0.584826	-0.05047	-0.734053
YMR022W	UBC7	ubc7	-0.0397	-0.644007	-0.01035	-0.272595	-0.05045	-0.7338
YLR314C	CDC3	cdc3-1	0.04734	0.613843	-0.13817	-1.97836	-0.0504	-0.733168
YPR057W	BRR1	brr1	0.01782	0.187238	0.01956	0.126556	-0.05035	-0.732535
YDR054C	CDC34	cdc34-1	-0.02781	-0.47218	0.11077	1.34376	-0.05027	-0.731523
YDR062W	LCB2	lcb2-2	-0.1001	-1.51687	0.00434	-0.0765556	-0.05002	-0.728361
YFR048W	RMD8	rmd8	0.02963	0.357909	0.07681	0.890561	-0.05	-0.728108
YPL249C	GYP5	gyp5	-0.04757	-0.75774	-0.02072	-0.410983	-0.04993	-0.727222
YDR145W	TAF12	taf12-ts23	0.00188	-0.0431177	-0.08919	-1.32472	-0.04989	-0.726716
YBR265W	TSC10	tsc10-1	-0.00355	-0.121589	-0.08462	-1.26373	-0.04987	-0.726463
YDL142C	CRD1	crd1	-0.037	-0.604988	-0.03407	-0.58914	-0.04964	-0.723554
YDR233C	RTN1	rtn1	-0.02404	-0.417698	-0.02703	-0.49519	-0.04956	-0.722542
YKR078W	YKR078W	ykr078w	-0.03536	-0.581288	-0.00752	-0.234828	-0.04955	-0.722415
YHL034C	SBP1	sbp1	-0.00546	-0.149191	0.05757	0.633802	-0.04953	-0.722162
YDR002W	YRB1	yrb1-51	-0.03001	-0.503973	-0.02324	-0.444613	-0.04951	-0.721909
YGR074W	SMD1	smd1-1	0.0894	1.22167	-0.12774	-1.83917	-0.04949	-0.721656
YGR121C	MEP1	mep1	-0.01879	-0.341828	-0.01988	-0.399773	-0.04942	-0.720771
YDL008W	APC11	apc11-22	-0.00125	-0.0883507	0.00803	-0.0273123	-0.0492	-0.717988
YPR084W	YPR084W	ypr084w	0.05276	0.69217	0.10143	1.21912	-0.04916	-0.717482
YOR357C	SNX3	snx3	0.00019	-0.0675406	-0.0077	-0.23723	-0.04913	-0.717102
YHR167W	THP2	thp2	-0.05289	-0.834621	-0.00229	-0.165033	-0.0491	-0.716723
YKL046C	DCW1	dcw1	-0.02189	-0.386628	-0.08929	-1.32605	-0.04904	-0.715964
YDR052C	DBF4	dbf4-2	-0.11495	-1.73148	0.04181	0.423484	-0.04901	-0.715584
YDL216C	RRI1	rri1	-0.05998	-0.937082	-0.09175	-1.35888	-0.04893	-0.714572
YJL019W	MPS3	mps3-7	0.23846	3.3758	-0.6406	-8.68332	-0.04881	-0.713054
YDL017W	CDC7	cdc7-1	-0.0679	-1.05154	0.08962	1.06151	-0.04876	-0.712422
YFR037C	RSC8	rsc8-ts16	-0.02642	-0.452093	-0.17372	-2.45278	-0.04867	-0.711283
YDL097C	RPN6	rpn6-ph	0.03973	0.503868	0.03747	0.365566	-0.04808	-0.70382
YOL053W	AIM39	aim39	-0.02448	-0.424057	-0.04062	-0.67655	-0.048	-0.702808
YBR147W	RTC2	rtc2	-0.05577	-0.876241	0.05515	0.601507	-0.04778	-0.700025
YGR263C	SAY1	say1	-0.02086	-0.371743	-0.01348	-0.314365	-0.04772	-0.699266
YDR492W	IZH1	izh1	-0.01033	-0.219569	-0.00454	-0.19506	-0.04765	-0.69838
YDR180W	SCC2	scc2-4	-0.08494	-1.29779	-0.02988	-0.533224	-0.04749	-0.696356
YJR119C	JHD2	jhd2	-0.03991	-0.647042	0.01891	0.117882	-0.04747	-0.696103
YGR256W	GND2	gnd2	-0.03124	-0.521748	0.00509	-0.0665468	-0.04746	-0.695977
YOR038C	HIR2	hir2	-0.01879	-0.341828	0.02377	0.182739	-0.04708	-0.69117
YJR061W	YJR061W	yjr061w	0.01071	0.0844882	-0.02564	-0.476641	-0.04699	-0.690031
YHR184W	SSP1	ssp1	-0.04992	-0.791701	-0.3122	-4.3008	-0.04694	-0.689399
YOL027C	MDM38	mdm38	-0.03934	-0.638805	-0.07456	-1.12948	-0.04693	-0.689272
YPL211W	NIP7	nip7-1	-0.05292	-0.835055	-0.04923	-0.791451	-0.04685	-0.68826
YOL092W	YPQ1	ypq1	0.01333	0.122351	0.0532	0.575484	-0.04682	-0.687881
YGR217W	CCH1	cch1	0.01234	0.108044	-0.01218	-0.297016	-0.04676	-0.687122
YMR033W	ARP9	arp9-1	-0.0559	-0.87812	-0.11898	-1.72227	-0.04662	-0.685351
YPL116W	HOS3	hos3	-0.03486	-0.574062	-0.0176	-0.369346	-0.04658	-0.684845
YOR175C	ALE1	ale1	-0.01362	-0.267115	-0.15953	-2.26341	-0.04656	-0.684592
YDR454C	GUK1	guk1-ph	0.02187	0.245766	-0.07212	-1.09692	-0.04656	-0.684592
YMR224C	MRE11	mre11	-0.04842	-0.770024	-0.035365	-0.606421	-0.04652	-0.684086
YKL052C	ASK1	ask1-2	-0.00047	-0.0770786	0.03921	0.388787	-0.04651	-0.683959
YKL130C	SHE2	she2	-0.02122	-0.376945	-0.03272	-0.571124	-0.04641	-0.682694
YHR132W-A	IGO2	igo2	-0.03922	-0.637071	-0.08641	-1.28762	-0.04637	-0.682188
YGR091W	PRP31	prp31-1	0.02808	0.335509	0.051	0.546125	-0.04636	-0.682062
YBR154C	RPB5	rpb5-ph	0.02785	0.332185	-0.04951	-0.795187	-0.04632	-0.681556
YDR513W	GRX2	grx2	-0.02973	-0.499927	-0.04608	-0.749414	-0.0463	-0.681303
YPR178W	PRP4	prp4-ts	-0.03936	-0.639094	0.01186	0.0237992	-0.0463	-0.681303
YDR052C	DBF4	dbf4-4	-0.17776	-2.63917	-0.04959	-0.796255	-0.04628	-0.68105
YGL207W	SPT16	spt16-ts	0.00642	0.0224916	0.0458	0.476731	-0.04618	-0.679785
YCR005C	CIT2	cit2	-0.01959	-0.353389	-0.06606	-1.01605	-0.04615	-0.679405
YLR006C	SSK1	ssk1	-0.03443	-0.567848	0.00708	-0.0399902	-0.04603	-0.677887
YOL053C	YOL053C	yol053c-a	-0.01565	-0.296451	-0.03824	-0.644788	-0.04598	-0.677255
YCL039W	GID7	gid7	-0.02017	-0.361771	-0.02698	-0.494523	-0.04596	-0.677002
YPR118W	MRI1	mri1	0.23001	3.25368	-0.05112	-0.816673	-0.04586	-0.675737
YDR502C	SAM2	sam2	-0.00432	-0.132716	0.02079	0.142971	-0.04571	-0.673839
YDR449C	YDR449C	ydr449c-ph	0.00707	0.0318851	-0.04058	-0.676016	-0.04567	-0.673333
YJL098W	SAP185	sap185	-0.05624	-0.883034	0.04125	0.416011	-0.04559	-0.672321
YDR420W	HKR1	hkr1	-0.01739	-0.321596	-0.07961	-1.19687	-0.04557	-0.672068
YML070W	DAK1	dak1	0.07594	1.02715	0.09504	1.13384	-0.04557	-0.672068
YDL219W	DTD1	dtd1	0.02507	0.29201	0.01817	0.108007	-0.04556	-0.671942
YNL009W	IDP3	idp3	-0.07744	-1.1894	-0.02194	-0.427264	-0.04555	-0.671815
YLR294C	YLR294C	ylr294c	-0.03286	-0.54516	-0.02739	-0.499995	-0.04525	-0.66802
YIL109C	SEC24	sec24-2	-0.00766	-0.180984	-0.09064	-1.34407	-0.04517	-0.667008
YLR063W	YLR063W	ylr063w	-0.05859	-0.916994	-0.04863	-0.783444	-0.04516	-0.666882
YDR467C	YDR467C	ydr467c	-0.06039	-0.943007	-0.03703	-0.628641	-0.04516	-0.666882
YMR106C	YKU80	yku80	-0.01405	-0.273329	-0.06216	-0.964002	-0.04505	-0.66549
YLR007W	NSE1	nse1-16	-0.02039	-0.364951	-0.0679	-1.0406	-0.04495	-0.664225
YOL150C	YOL150C	yol150c	0.01179	0.100096	-0.05317	-0.84403	-0.04493	-0.663972
YJR043C	POL32	pol32	-0.044745	-0.716915	0.019045	0.119684	-0.044885	-0.663403
YDL220C	CDC13	cdc13-1	-0.01515	-0.289225	-0.08104	-1.21596	-0.04485	-0.66296
YBL069W	AST1	ast1	-0.0076	-0.180117	-0.09219	-1.36475	-0.04483	-0.662707
YOL155C	HPF1	hpf1	0.00567	0.0116531	-0.0055	-0.207871	-0.04472	-0.661316
YLR088W	GAA1	gaa1-ts	0.0659	0.882061	0.16993	2.13325	-0.04462	-0.660051
YLR239C	LIP2	lip2	-0.05376	-0.847194	-0.04481	-0.732466	-0.04437	-0.656888
YOR336W	KRE5	kre5-ts2	-0.00793	-0.184886	0.11778	1.43731	-0.04432	-0.656256
YLR412W	BER1	ber1	-0.08017	-1.22886	-0.00034	-0.139011	-0.04421	-0.654864
YLR305C	STT4	stt4-4	0.00603	0.0168556	0.14183	1.75826	-0.04407	-0.653093
YDR332W	IRC3	irc3	0.0115	0.0959048	-0.01831	-0.378821	-0.04405	-0.65284
YGR261C	APL6	apl6	-0.03889	-0.632302	0.0255	0.205826	-0.04398	-0.651955
YBL023C	MCM2	mcm2-1	-0.01162	-0.238212	-0.22396	-3.12323	-0.04392	-0.651196
YDR425W	SNX41	snx41	0.00622	0.0196014	0.01051	0.00578341	-0.04385	-0.65031
YDR325W	YCG1	ycg1-2	-0.0299	-0.502383	0.04826	0.50956	-0.04379	-0.649551
YJR126C	VPS70	vps70	-0.01091	-0.227951	-0.05376	-0.851904	-0.04372	-0.648666
YLR183C	TOS4	tos4	-0.02198	-0.387928	-0.03638	-0.619967	-0.0436	-0.647148
YKL040C	NFU1	nfu1	-0.06819	-1.05573	-0.05913	-0.923567	-0.04344	-0.645124
YOR043W	WHI2	whi2	-0.11696	-1.76052	-0.06277	-0.972143	-0.0434	-0.644618
YMR219W	ESC1	esc1	-0.01067	-0.224483	0.05549	0.606044	-0.04337	-0.644238
YHL042W	YHL042W	yhl042w	-0.04665	-0.744445	-0.05002	-0.801993	-0.04334	-0.643859
YGR177C	ATF2	atf2	-0.04546	-0.727247	-0.03263	-0.569923	-0.04309	-0.640696
YDR453C	TSA2	tsa2	-0.03555	-0.584034	-0.00341	-0.17998	-0.04297	-0.639178
YLR215C	CDC123	cdc123-4	-0.04418	-0.70875	0.02213	0.160853	-0.04275	-0.636395
YPR201W	ARR3	arr3	0.02649	0.312531	-0.0338	-0.585536	-0.04274	-0.636269
YLL063C	AYT1	ayt1	-0.04769	-0.759474	-0.02653	-0.488518	-0.04272	-0.636016
YOR099W	KTR1	ktr1	-0.05103	-0.807742	-0.10301	-1.50915	-0.04258	-0.634245
YAL020C	ATS1	ats1	-0.01199	-0.243559	-0.01	-0.267924	-0.04251	-0.633359
YJR083C	ACF4	acf4	-0.01402	-0.272895	0.013	0.0390126	-0.04239	-0.631841
YKR070W	YKR070W	ykr070w	-0.02562	-0.440531	-0.03096	-0.547636	-0.04232	-0.630956
YBR050C	REG2	reg2	-0.04403	-0.706582	-0.03244	-0.567387	-0.04225	-0.63007
YOR237W	HES1	hes1	-0.01967	-0.354546	-0.01487	-0.332914	-0.04222	-0.629691
YLR317W	YLR317W	ylr317w-ph	-0.0241	-0.418565	-0.03817	-0.643854	-0.04217	-0.629058
YGR260W	TNA1	tna1	-0.03228	-0.536778	-0.14022	-2.00572	-0.04194	-0.626149
YDR385W	EFT2	eft2	0.0081	0.04677	-0.02833	-0.512539	-0.04187	-0.625263
YPL177C	CUP9	cup9	-0.0155	-0.294283	0.01508	0.0667704	-0.04187	-0.625263
YNL006W	LST8	lst8-15	-0.0693	-1.07177	0.05054	0.539986	-0.04183	-0.624757
YOR034C	AKR2	akr2	-0.01698	-0.315671	0.10018	1.20244	-0.04174	-0.623619
YMR048W	CSM3	csm3	-0.08244	-1.26166	-0.18304	-2.57715	-0.0417	-0.623113
YKL163W	PIR3	pir3	-0.02555	-0.43952	0.00112	-0.119527	-0.04167	-0.622733
YDR479C	PEX29	pex29	-0.03135	-0.523338	-0.0345	-0.594878	-0.04165	-0.62248
YLL042C	ATG10	atg10	-0.06095	-0.9511	-0.00384	-0.185718	-0.04163	-0.622227
YPL229W	YPL229W	ypl229w	-0.0054	-0.148324	-0.03826	-0.645055	-0.04155	-0.621215
YGR100W	MDR1	mdr1	-0.04269	-0.687217	-0.08072	-1.21169	-0.04148	-0.62033
YJR065C	ARP3	arp3-g302y	0.159	2.22749	0.1005	1.20671	-0.04142	-0.619571
YPR161C	YPR161C	ypr161c-ph	0.03299	0.406466	-0.05819	-0.911023	-0.04126	-0.617547
YBR087W	RFC5	rfc5-1	-0.04422	-0.709328	-0.06117	-0.950791	-0.04106	-0.615017
YMR015C	ERG5	erg5	0.00744	0.0372321	-0.04898	-0.788114	-0.04104	-0.614764
YIL034C	CAP2	cap2	-0.01702	-0.316249	0.03129	0.283094	-0.041	-0.614258
YIL053W	RHR2	rhr2	-0.01913	-0.346742	0.01664	0.0875887	-0.04092	-0.613246
YGR140W	CBF2	cbf2-1	0.00255	-0.0334353	-0.00831	-0.245371	-0.04087	-0.612613
YKR076W	ECM4	ecm4	-0.02612	-0.447757	-0.01247	-0.300886	-0.04086	-0.612487
YOR018W	ROD1	rod1	0.01275	0.113969	-0.03779	-0.638783	-0.04084	-0.612234
YOL042W	NGL1	ngl1	-0.02844	-0.481284	0.03506	0.333405	-0.04081	-0.611854
YDR380W	ARO10	aro10	-0.01488	-0.285323	-0.00147	-0.15409	-0.04078	-0.611475
YHR086W	NAM8	nam8	-0.02511	-0.433161	-0.10701	-1.56253	-0.04072	-0.610716
YNR007C	ATG3	atg3	-0.04331	-0.696177	0.00272	-0.0981746	-0.04064	-0.609704
YJL169W	YJL169W	yjl169w	0.00429	-0.00828985	0.04621	0.482202	-0.04061	-0.609324
YNR059W	MNT4	mnt4	0.04443	0.57179	0.02438	0.190879	-0.04058	-0.608945
YKL061W	BLI1	bli1	-0.03242	-0.538801	-0.04594	-0.747545	-0.04046	-0.607427
YGL080W	FMP37	fmp37	0.0465	0.601704	-0.00923	-0.257648	-0.04046	-0.607427
YCR033W	SNT1	snt1	-0.0418	-0.674355	-0.03692	-0.627173	-0.04011	-0.602999
YDR064W	RPS13	rps13-ph	-0.02152	-0.381281	-0.0826	-1.23678	-0.0401	-0.602873
YHR083W	SAM35	sam35-2	0.03354	0.414414	0.0796	0.927794	-0.04001	-0.601734
YLR127C	APC2	apc2-8	0.03486	0.43349	-0.04204	-0.6955	-0.03997	-0.601228
YOR341W	RPA190	rpa190-g728d	-0.03465	-0.571028	0.03029	0.269749	-0.0399	-0.600343
YLR035C	MLH2	mlh2	-0.01948	-0.3518	0.02083	0.143504	-0.03988	-0.60009
YLR020C	YEH2	yeh2	-0.03206	-0.533599	-0.02556	-0.475573	-0.03977	-0.598698
YLR059C	REX2	rex2	-0.00428	-0.132138	-0.11699	-1.69571	-0.03972	-0.598066
YKR017C	HEL1	hel1	-0.00029	-0.0744773	-0.0015	-0.154491	-0.03968	-0.59756
YMR027W	YMR027W	ymr027w	-0.03382	-0.559033	-0.0276	-0.502797	-0.03957	-0.596168
YDR239C	YDR239C	ydr239c	-0.02963	-0.498482	0.01335	0.0436834	-0.03954	-0.595789
YDR331W	GPI8	gpi8-ts	0.02796	0.333775	0.08673	1.02294	-0.03947	-0.594903
YOL129W	VPS68	vps68	-0.00192	-0.0980331	0.05014	0.534648	-0.03941	-0.594144
YOR115C	TRS33	trs33	0.00178	-0.0445629	-0.0404	-0.673614	-0.03939	-0.593891
YGL048C	RPT6	rpt6-25	0.03205	0.392881	0.0092	-0.0116986	-0.03935	-0.593385
YDR228C	PCF11	pcf11-ts2	-0.06641	-1.03	-0.05294	-0.840961	-0.03928	-0.5925
YDR279W	RNH202	rnh202	-0.01867	-0.340094	-0.01662	-0.356268	-0.03919	-0.591361
YMR259C	TRM732	trm732	-0.02051	-0.366685	-0.01977	-0.398305	-0.03914	-0.590729
YKL173W	SNU114	snu114-40	-0.00193	-0.0981776	0.00404	-0.0805592	-0.0391	-0.590223
YPR106W	ISR1	isr1	0.02249	0.254726	0.05194	0.558669	-0.03908	-0.58997
YLR431C	ATG23	atg23	-0.01468	-0.282433	-0.04434	-0.726193	-0.03902	-0.589211
YOR010C	TIR2	tir2	0.04643	0.600692	-0.02016	-0.40351	-0.039	-0.588958
YOL069W	NUF2	nuf2-ph	-0.01041	-0.220726	0.01753	0.0994658	-0.039	-0.588958
YGL044C	RNA15	rna15-58	-0.02477	-0.428248	0.01893	0.118149	-0.03897	-0.588578
YML069W	POB3	pob3-q308k	0.12387	1.71981	-0.05585	-0.879795	-0.03894	-0.588199
YPR162C	YPR162C	ypr162c-ph	-0.09155	-1.39331	-0.16755	-2.37044	-0.03893	-0.588072
YKL017C	HCS1	hcs1	-0.04165	-0.672188	-0.01472	-0.330913	-0.03884	-0.586934
YBR030W	RKM3	rkm3	-0.03058	-0.51221	0.03563	0.341011	-0.03883	-0.586807
YLR273C	PIG1	pig1	-0.01281	-0.255409	0.03926	0.389454	-0.03883	-0.586807
YBR109C	CMD1	cmd1-3	-0.04737	-0.75485	0.12239	1.49883	-0.0388	-0.586428
YOL062C	APM4	apm4	-0.03465	-0.571028	-0.00869	-0.250442	-0.03879	-0.586301
YGR207C	CIR1	cir1	-0.09081	-1.38262	-0.00232	-0.165434	-0.03871	-0.585289
YPL111W	CAR1	car1	-0.0601	-0.938816	0.00562	-0.059474	-0.03867	-0.584783
YMR028W	TAP42	tap42-11	-0.05424	-0.854131	-0.00116	-0.149953	-0.03861	-0.584024
YIL105C	SLM1	slm1	-0.01582	-0.298908	0.00891	-0.0155687	-0.03859	-0.583771
YGR113W	DAM1	dam1-5	-0.01546	-0.293705	0.01582	0.0766457	-0.03852	-0.582886
YCR017C	CWH43	cwh43	-0.0208	-0.370876	0.01888	0.117482	-0.03852	-0.582886
YOL030W	GAS5	gas5	-0.00465	-0.137485	-0.02493	-0.467166	-0.03842	-0.581621
YNL122C	YNL122C	ynl122c	-0.1317	-1.97354	-0.1014	-1.48766	-0.0384	-0.581368
YLR262C-A	TMA7	tma7	-0.06793	-1.05197	-0.01326	-0.311429	-0.03834	-0.580609
YGR132C	PHB1	phb1	-0.03206	-0.533599	0.0271	0.227178	-0.03831	-0.580229
YMR017W	SPO20	spo20	-0.05095	-0.806586	-0.17843	-2.51563	-0.03828	-0.57985
YBL105C	PKC1	pkc1-ts	0.04416	0.567888	0.06142	0.685181	-0.03828	-0.57985
YJR093C	FIP1	fip1-ph	-0.00726	-0.175204	0.06221	0.695723	-0.03826	-0.579597
YKL221W	MCH2	mch2	-0.06221	-0.969308	-0.07762	-1.17032	-0.03818	-0.578585
YHR032W	ERC1	erc1	-0.00632	-0.161619	0.04228	0.429756	-0.03812	-0.577826
YKL047W	ANR2	anr2	-0.00762	-0.180406	-0.02465	-0.463429	-0.03806	-0.577067
YFL048C	EMP47	emp47	-0.03169	-0.528252	0.02107	0.146707	-0.03802	-0.576561
YGL227W	VID30	vid30	-0.02874	-0.48562	-0.02977	-0.531756	-0.03795	-0.575675
YNR071C	YNR071C	ynr071c	0.21276	3.0044	0.15314	1.90919	-0.03795	-0.575675
YJL068C	YJL068C	yjl068c	0.01116	0.0909913	0.01735	0.0970637	-0.03787	-0.574663
YKR029C	SET3	set3	-0.04563	-0.729704	-0.05322	-0.844698	-0.03781	-0.573904
YDR406W	PDR15	pdr15	-0.04347	-0.698489	0.00135	-0.116457	-0.03777	-0.573398
YMR124W	YMR124W	ymr124w	-0.06606	-1.02495	-0.03483	-0.599282	-0.03762	-0.571501
YJL016W	YJL017W	yjl017w	-0.02977	-0.500505	-0.01457	-0.328911	-0.03761	-0.571374
YHR003C	YHR003C	yhr003c	-0.04211	-0.678835	0.04636	0.484204	-0.03744	-0.569224
YDR218C	SPR28	spr28	0.01522	0.149664	0.03573	0.342346	-0.03742	-0.568971
YER185W	PUG1	pug1	-0.02111	-0.375356	0.08984	1.06445	-0.03742	-0.568971
YPL003W	ULA1	ula1	0.03156	0.3858	-0.01896	-0.387496	-0.03734	-0.567959
YCR006C	YCR006C	ycr006c	-0.01058	-0.223182	0.01506	0.0665035	-0.03734	-0.567959
YDR398W	YDR398W	ydr398w-ph	-0.01757	-0.324198	-0.01298	-0.307692	-0.03728	-0.5672
YJL079C	PRY1	pry1	0.10707	1.47703	-0.06245	-0.967872	-0.03725	-0.56682
YLR281C	YLR281C	ylr281c	-0.01604	-0.302087	0.01026	0.00244715	-0.03722	-0.566441
YKL140W	TGL1	tgl1	0.0048	-0.000919635	0.02409	0.187009	-0.03721	-0.566314
YLR397C	AFG2	afg2-18	0.02188	0.24591	-0.00485	-0.199197	-0.03719	-0.566061
YPL240C	HSP82	hsp82	-0.00112	-0.086472	-0.03112	-0.549772	-0.03718	-0.565935
YKL116C	PRR1	prr1	0.00462	-0.00352089	0.01097	0.0119221	-0.03712	-0.565176
YGR144W	THI4	thi4	0.03368	0.416437	-0.01689	-0.359871	-0.0371	-0.564923
YAL042W	ERV46	erv46	-0.033	-0.547183	-0.09493	-1.40132	-0.03704	-0.564164
YGR244C	LSC2	lsc2	-0.05902	-0.923208	-0.02542	-0.473705	-0.03701	-0.563784
YMR075W	RCO1	rco1	-0.040765	-0.659398	-0.05642	-0.887402	-0.03694	-0.562899
YOR055W	YOR055W	yor055w	-0.03654	-0.598341	-0.04691	-0.76049	-0.03688	-0.56214
YJR009C	TDH2	tdh2	-0.02695	-0.459752	-0.04052	-0.675215	-0.03681	-0.561254
YHR195W	NVJ1	nvj1	-0.04363	-0.700801	-0.00629	-0.218414	-0.03681	-0.561254
YCR101C	YCR101C	ycr101c	0.02258	0.256026	0.05856	0.647014	-0.03675	-0.560495
YML099C	ARG81	arg81	0.04524	0.583495	-0.03577	-0.611826	-0.0367	-0.559863
YOR296W	YOR296W	yor296w	-0.08315	-1.27192	-0.06542	-1.00751	-0.03654	-0.557839
YLR368W	MDM30	mdm30	-0.00785	-0.18373	-0.00875	-0.251243	-0.03651	-0.557459
YHR109W	CTM1	ctm1	-0.00975	-0.211188	-0.01367	-0.3169	-0.03647	-0.556953
YDR257C	RKM4	rkm4	-0.01314	-0.260178	0.02628	0.216235	-0.03638	-0.555815
YHR163W	SOL3	sol3	0.00449	-0.00539957	-0.03211	-0.562983	-0.03635	-0.555435
YOL008W	COQ10	coq10	-0.06131	-0.956302	0.01814	0.107606	-0.03633	-0.555182
YLR073C	RFU1	rfu1	-0.01848	-0.337348	0.01355	0.0463524	-0.03627	-0.554423
YDL084W	SUB2	sub2-1	0.04327	0.555026	0.01532	0.0699732	-0.03626	-0.554297
YLR185W	RPL37A	rpl37a	0.04903	0.638266	0.01394	0.051557	-0.03624	-0.554044
YCL046W	YCL046W	ycl046w	-0.01905	-0.345586	-0.0442	-0.724325	-0.03623	-0.553917
YLR344W	RPL26A	rpl26a	-0.0336	-0.555854	0.01674	0.0889232	-0.03621	-0.553664
YPL194W	DDC1	ddc1	0.00561	0.010786	-0.03573	-0.611292	-0.0362	-0.553538
YMR302C	YME2	yme2	-0.04083	-0.660337	0.00036	-0.129669	-0.0362	-0.553538
YGL141W	HUL5	hul5	0.00789	0.0437352	0.00279	-0.0972405	-0.03618	-0.553285
YPL196W	OXR1	oxr1	0.02156	0.241286	0.0451	0.467389	-0.03618	-0.553285
YDR281C	PHM6	phm6	-0.00559	-0.15107	0.02079	0.142971	-0.03595	-0.550375
YDR236C	YDR236C	ydr236c-ph	0.00798	0.0450358	0.09331	1.11075	-0.03593	-0.550122
YDR085C	AFR1	afr1	-0.01365	-0.267548	0.0181	0.107072	-0.0359	-0.549743
YIL147C	SLN1	sln1-ts4	0.01724	0.178856	-0.03116	-0.550305	-0.03587	-0.549363
YBL074C	AAR2	aar2-ph	-0.06999	-1.08174	-0.02674	-0.49132	-0.03584	-0.548984
YOR028C	CIN5	cin5	-0.00963	-0.209453	-0.02246	-0.434203	-0.03579	-0.548351
YCR060W	TAH1	tah1	-0.01286	-0.256132	-0.03984	-0.666141	-0.03567	-0.546833
YLR312C	YLR312C	ylr312c	-0.04867	-0.773636	0.01023	0.00204679	-0.03567	-0.546833
YGL118C	YGL118C	ygl118c	0.0109	0.087234	-0.03035	-0.539496	-0.03554	-0.545189
YPR003C	YPR003C	ypr003c	0.00656	0.0245148	0.04565	0.474729	-0.0355	-0.544683
YIL071C	PCI8	pci8	-0.00944	-0.206708	-0.00868	-0.250308	-0.03548	-0.54443
YHR009C	TDA3	tda3	-0.01424	-0.276074	-0.0065	-0.221216	-0.03538	-0.543165
YOR072W	YOR072W	yor072w	-0.00618	-0.159596	-0.01072	-0.277532	-0.03535	-0.542785
YKL125W	RRN3	rrn3-s213p	0.00659	0.0249484	0.02022	0.135364	-0.03533	-0.542532
YLR298C	YHC1	yhc1-1	-0.03211	-0.534321	-0.02688	-0.493189	-0.03528	-0.5419
YPR133C	SPN1	spn1-k192n	-0.06686	-1.03651	-0.11278	-1.63953	-0.03526	-0.541647
YNR011C	PRP2	prp2-1	0.04727	0.612832	0.00917	-0.012099	-0.03523	-0.541267
YJR076C	CDC11	cdc11-3	-0.04562	-0.72956	-0.25186	-3.49556	-0.03514	-0.540129
YDR452W	PPN1	ppn1	-0.02258	-0.396599	-0.01982	-0.398972	-0.03513	-0.540002
YJL117W	PHO86	pho86	-0.00184	-0.096877	-0.04239	-0.70017	-0.03505	-0.53899
YMR061W	RNA14	rna14-ph	-0.04309	-0.692998	-0.11636	-1.6873	-0.03498	-0.538105
YCR086W	CSM1	csm1	-0.03189	-0.531142	-0.05588	-0.880195	-0.03492	-0.537346
YOL066C	RIB2	rib2-ph	0.03454	0.428865	0.13774	1.70368	-0.03488	-0.53684
YHR088W	RPF1	rpf1-ph	-0.01299	-0.25801	0.06402	0.719878	-0.03485	-0.53646
YFR038W	IRC5	irc5	0.00432	-0.00785631	0.01918	0.121485	-0.03484	-0.536334
YLL032C	YLL032C	yll032c	-0.01965	-0.354257	-0.03045	-0.54083	-0.03482	-0.536081
YGL059W	PKP2	pkp2	0.0176	0.184058	-0.02924	-0.524683	-0.03473	-0.534942
YHR137W	ARO9	aro9	-0.03502	-0.576375	-0.02175	-0.424728	-0.03466	-0.534057
YDL071C	YDL071C	ydl071c	-0.03911	-0.635481	-0.06747	-1.03486	-0.0346	-0.533298
YDR333C	YDR333C	ydr333c	-0.03721	-0.608023	0.01037	0.0039151	-0.0346	-0.533298
YOR042W	CUE5	cue5	-0.02063	-0.368419	-0.05597	-0.881396	-0.03447	-0.531653
YDL118W	YDL118W	ydl118w	-0.03113	-0.520159	-0.09145	-1.35488	-0.03445	-0.5314
YDR476C	YDR476C	ydr476c	-0.01666	-0.311047	0.00743	-0.0353194	-0.03438	-0.530515
YHR191C	CTF8	ctf8-162	-0.06022	-0.94055	-0.03411	-0.589673	-0.03426	-0.528997
YLR208W	SEC13	sec13-1	0.00804	0.0459029	0.06631	0.750438	-0.03425	-0.52887
YKR030W	GMH1	gmh1	0.0298	0.360366	0.01168	0.0213971	-0.03417	-0.527858
YER173W	RAD24	rad24	-0.01791	-0.329111	-0.08936	-1.32699	-0.03416	-0.527732
YNL070W	TOM7	tom7	-0.00411	-0.129682	-0.02602	-0.481712	-0.0341	-0.526973
YJL045W	YJL045W	yjl045w	0.00578	0.0132427	-0.06157	-0.956129	-0.03406	-0.526467
YGR111W	YGR111W	ygr111w	-0.00707	-0.172458	-0.0282	-0.510804	-0.03402	-0.525961
YPR134W	MSS18	mss18	-0.04883	-0.775949	-0.00063	-0.142881	-0.03394	-0.524949
YHR138C	YHR138C	yhr138c	-0.01881	-0.342117	-0.05428	-0.858843	-0.03389	-0.524316
YOR100C	CRC1	crc1	-0.00433	-0.132861	0.01473	0.0620996	-0.03368	-0.52166
YPL236C	ENV7	env7	-0.00738	-0.176938	-0.04666	-0.757154	-0.03359	-0.520521
YLR084C	RAX2	rax2	-0.02382	-0.414519	-0.0503	-0.80573	-0.03358	-0.520395
YDR251W	PAM1	pam1	-0.02953	-0.497036	-0.19263	-2.70513	-0.03355	-0.520015
YDL002C	NHP10	nhp10	-0.032305	-0.537139	-0.05853	-0.91556	-0.03351	-0.519509
YPL091W	GLR1	glr1	-0.01039	-0.220437	-0.01637	-0.352932	-0.03351	-0.519509
YBR109C	CMD1	cmd1-1	0.0372	0.467306	0.1095	1.32681	-0.03351	-0.519509
YLR103C	CDC45	cdc45-27	-0.04948	-0.785342	-0.06784	-1.0398	-0.03345	-0.51875
YBR162C	TOS1	tos1	-0.03951	-0.641262	-0.02663	-0.489852	-0.03345	-0.51875
YJR142W	YJR142W	yjr142w	0.0028	-0.0298225	0.00341	-0.0889665	-0.03345	-0.51875
YJL027C	YJL027C	yjl027c	-0.01665	-0.310902	-0.01522	-0.337585	-0.03342	-0.518371
YBL106C	SRO77	sro77	0.00457	-0.00424346	-0.03499	-0.601417	-0.03339	-0.517991
YBR177C	EHT1	eht1	-0.02478	-0.428392	0.03364	0.314455	-0.03335	-0.517485
YLR298C	YHC1	yhc1-8	-0.00516	-0.144856	0.05015	0.534782	-0.0333	-0.516853
YNL132W	YNL132W	ynl132w-ph	-0.01249	-0.250784	-0.03471	-0.59768	-0.0332	-0.515588
YGL244W	RTF1	rtf1	-0.02715	-0.462642	0.00081	-0.123664	-0.03318	-0.515335
YPL001W	HAT1	hat1	-0.11532	-1.73682	-0.00618	-0.216946	-0.03307	-0.513943
YPR016C	YPR016C	ypr016c-ph	-0.01335	-0.263213	0.05326	0.576285	-0.03303	-0.513437
YJL182C	YJL182C	yjl182c	-0.00515	-0.144711	0.00146	-0.114989	-0.03299	-0.512931
YOR382W	FIT2	fit2	0.01117	0.0911358	-0.02647	-0.487717	-0.03292	-0.512046
YGR010W	NMA2	nma2	-0.00648	-0.163932	-0.04255	-0.702306	-0.0329	-0.511793
YOR057W	SGT1	sgt1-3	-0.00528	-0.14659	0.0821	0.961157	-0.03276	-0.510022
YBR065C	ECM2	ecm2	-0.01699	-0.315816	-0.01582	-0.345592	-0.03271	-0.509389
YJR133W	XPT1	xpt1	-0.04335	-0.696755	-0.05495	-0.867784	-0.03268	-0.50901
YLR003C	CMS1	cms1	-0.03099	-0.518136	-0.05035	-0.806397	-0.03268	-0.50901
YDR036C	EHD3	ehd3	-0.06826	-1.05674	-0.04738	-0.766762	-0.03268	-0.50901
YIL163C	YIL163C	yil163c	0.02148	0.24013	-0.05129	-0.818942	-0.03262	-0.508251
YHR200W	RPN10	rpn10	-0.04415	-0.708316	-0.054505	-0.861846	-0.03261	-0.508124
YGL093W	SPC105	spc105-4	-0.01872	-0.340817	-0.05874	-0.918362	-0.03259	-0.507871
YML126C	ERG13	erg13-ph	0.04015	0.509938	0.06959	0.79421	-0.03259	-0.507871
YOR003W	YSP3	ysp3	-0.0181	-0.331857	-0.05889	-0.920364	-0.03257	-0.507618
YJL066C	MPM1	mpm1	-5e-05	-0.071009	0.06754	0.766852	-0.03254	-0.507239
YDL135C	RDI1	rdi1	-0.06627	-1.02798	0.03884	0.383849	-0.03249	-0.506606
YLL051C	FRE6	fre6	0.0346	0.429732	0.03318	0.308316	-0.03242	-0.505721
YHR139C	SPS100	sps100	-0.0462	-0.737941	-0.03368	-0.583935	-0.03237	-0.505088
YGR235C	MOS2	mos2	-0.03522	-0.579265	-0.03682	-0.625838	-0.0323	-0.504203
YGR026W	YGR026W	ygr026w	-0.00885	-0.198181	-0.04663	-0.756754	-0.03229	-0.504076
YBR296C	PHO89	pho89	0.02073	0.229291	0.02675	0.222507	-0.03229	-0.504076
YBR220C	YBR220C	ybr220c	0.01025	0.0778405	-0.02191	-0.426864	-0.03224	-0.503444
YGL146C	RRT6	rrt6	-0.0208	-0.370876	-0.03385	-0.586204	-0.03221	-0.503064
YPR190C	YPR190C	ypr190c-ph	-0.01444	-0.278965	-0.08338	-1.24718	-0.0322	-0.502938
YLR343W	GAS2	gas2	-0.01445	-0.279109	-0.0037	-0.18385	-0.03216	-0.502432
YAL028W	FRT2	frt2	-0.02285	-0.400501	-0.02025	-0.404711	-0.03213	-0.502052
YDL122W	UBP1	ubp1	-0.05119	-0.810054	-0.26733	-3.70201	-0.03212	-0.501926
YBR161W	CSH1	csh1	-0.03488	-0.574352	-0.01947	-0.394302	-0.0321	-0.501673
YML096W	YML096W	yml096w	-0.04237	-0.682593	-0.01386	-0.319436	-0.03209	-0.501546
YOR109W	INP53	inp53	-0.0272	-0.463365	-0.07938	-1.1938	-0.03206	-0.501167
YPL022W	RAD1	rad1	-0.04454	-0.713952	-0.02497	-0.467699	-0.03205	-0.50104
YLR229C	CDC42	cdc42-1	-0.11815	-1.77772	-0.12942	-1.86159	-0.03203	-0.500787
YOL124C	TRM11	trm11	-0.02724	-0.463943	0.03916	0.38812	-0.03194	-0.499649
YHL024W	RIM4	rim4	-0.00781	-0.183152	-0.04464	-0.730197	-0.03177	-0.497498
YOR137C	SIA1	sia1	0.0375	0.471641	0.119	1.45359	-0.03169	-0.496486
YIL047C	SYG1	syg1	-0.02192	-0.387061	0.02271	0.168593	-0.03165	-0.49598
YBR114W	RAD16	rad16	-0.02548	-0.438508	-0.04462	-0.72993	-0.03159	-0.495221
YLR002C	NOC3	noc3-ph	-0.01346	-0.264802	0.04968	0.52851	-0.03156	-0.494842
YKL159C	RCN1	rcn1	-0.08206	-1.25617	-0.05824	-0.91169	-0.03154	-0.494589
YDR537C	YDR537C	ydr537c	-0.02943	-0.495591	0.0123	0.0296711	-0.03147	-0.493703
YAR019C	CDC15	cdc15-2	-0.02026	-0.363072	0.12202	1.49389	-0.03146	-0.493577
YPL134C	ODC1	odc1	0.01284	0.11527	-0.04237	-0.699904	-0.03136	-0.492312
YJL070C	YJL070C	yjl070c	0.00422	-0.00930145	0.05398	0.585893	-0.03136	-0.492312
YMR138W	CIN4	cin4	0.03944	0.499677	-0.05145	-0.821077	-0.03133	-0.491932
YCR045C	RRT12	rrt12	-0.02073	-0.369864	-0.03226	-0.564985	-0.03132	-0.491806
YAL004W	YAL004W	yal004w	-0.04039	-0.653979	-0.00973	-0.264321	-0.03132	-0.491806
YDL130W	RPP1B	rpp1b	-0.03479	-0.573051	-0.04857	-0.782643	-0.03125	-0.49092
YBR180W	DTR1	dtr1	-0.03196	-0.532153	0.00379	-0.0838954	-0.03124	-0.490794
YOR374W	ALD4	ald4	-0.02565	-0.440965	0.05259	0.567344	-0.03124	-0.490794
YMR292W	GOT1	got1	-0.00256	-0.107282	-0.04924	-0.791584	-0.03121	-0.490414
YMR058W	FET3	fet3	-0.00671	-0.167255	-0.04076	-0.678418	-0.03121	-0.490414
YIR014W	YIR014W	yir014w	-0.03531	-0.580566	-0.01383	-0.319035	-0.03119	-0.490161
YGR080W	TWF1	twf1	-0.02562	-0.440531	-0.05405	-0.855774	-0.03112	-0.489276
YNL031C	HHT2	hht2	-0.00983	-0.212344	0.04916	0.52157	-0.0311	-0.489023
YPR098C	YPR098C	ypr098c	-0.00372	-0.124046	0.01978	0.129492	-0.03103	-0.488137
YPL155C	KIP2	kip2	0.28638	4.06831	-0.00883	-0.25231	-0.03097	-0.487378
YNR034W	SOL1	sol1	0.00866	0.0548628	-0.0047	-0.197195	-0.03095	-0.487125
YCR010C	ADY2	ady2	-0.01959	-0.353389	0.0471	0.494079	-0.03094	-0.486999
YGL109W	YGL109W	ygl109w	-0.01579	-0.298474	-0.02292	-0.440342	-0.03088	-0.48624
YIL162W	SUC2	suc2	0.00155	-0.0478867	0.00908	-0.0133	-0.03087	-0.486113
YML035C	AMD1	amd1	-0.03261	-0.541547	-0.22279	-3.10762	-0.03083	-0.485607
YKR089C	TGL4	tgl4	-0.02681	-0.457729	-0.01481	-0.332114	-0.0308	-0.485228
YCL027W	FUS1	fus1	-0.02914	-0.4914	0.00595	-0.0550701	-0.03079	-0.485101
YKL220C	FRE2	fre2	-0.03	-0.503829	-0.01761	-0.36948	-0.0307	-0.483963
YGL073W	HSF1	hsf1-848	0.04575	0.590866	-0.01106	-0.28207	-0.03068	-0.48371
YBR274W	CHK1	chk1	0.00054	-0.0624826	-0.00093	-0.146884	-0.03057	-0.482318
YNL086W	SNN1	snn1	-0.01931	-0.349343	-0.06052	-0.942116	-0.03055	-0.482065
YGL243W	TAD1	tad1	-0.0212	-0.376656	0.04382	0.450308	-0.03054	-0.481939
YLR456W	YLR456W	ylr456w	-0.00056	-0.0783792	-0.04681	-0.759156	-0.03052	-0.481686
YDL170W	UGA3	uga3	-0.00911	-0.201939	-0.04421	-0.724459	-0.03051	-0.481559
YNR061C	YNR061C	ynr061c	0.0347	0.431177	0.0172	0.0950619	-0.03048	-0.48118
YOR229W	WTM2	wtm2	0.03624	0.453433	-0.05658	-0.889537	-0.03047	-0.481053
YJR095W	SFC1	sfc1	-0.01224	-0.247172	-0.00701	-0.228022	-0.03042	-0.480421
YBR234C	ARC40	arc40-ph	0.03025	0.366869	0.0094	-0.00902961	-0.03035	-0.479535
YML104C	MDM1	mdm1	-0.0158	-0.298619	-0.00826	-0.244703	-0.03034	-0.479409
YKL098W	MTC2	mtc2	-0.03327	-0.551085	-0.03377	-0.585136	-0.03021	-0.477764
YDR271C	YDR271C	ydr271c	-0.03418	-0.564236	-0.03893	-0.653997	-0.03016	-0.477132
YOL059W	GPD2	gpd2	-0.00378	-0.124913	-0.03024	-0.538028	-0.03013	-0.476752
YDL019C	OSH2	osh2	0.00767	0.0405559	-0.01534	-0.339186	-0.03006	-0.475867
YLL035W	GRC3	grc3-ph	-0.02846	-0.481573	-0.02912	-0.523081	-0.03003	-0.475487
YLR023C	IZH3	izh3	-0.03801	-0.619584	-0.01576	-0.344791	-0.03	-0.475108
YDR354W	TRP4	trp4	-0.04566	-0.730138	-0.00984	-0.265789	-0.03	-0.475108
YBR121C	GRS1	grs1-ph	0.00089	-0.0574246	-0.07046	-1.07477	-0.02992	-0.474096
YGR038W	ORM1	orm1	-0.02888	-0.487643	-0.06831	-1.04607	-0.02986	-0.473337
YMR252C	YMR252C	ymr252c	0.01091	0.0873785	-0.02376	-0.451552	-0.02985	-0.47321
YOR074C	CDC21	cdc21-ts	-0.0419	-0.6758	-0.00459	-0.195727	-0.02982	-0.472831
YGR210C	YGR210C	ygr210c	-0.02681	-0.457729	0.03976	0.396127	-0.02982	-0.472831
YDR170C	SEC7	sec7-1	0.01932	0.208915	0.01919	0.121619	-0.02981	-0.472704
YCL044C	MGR1	mgr1	-0.04803	-0.764388	0.02841	0.24466	-0.02979	-0.472451
YKL171W	NNK1	nnk1	-0.00627	-0.160897	-0.04411	-0.723124	-0.02976	-0.472072
YOR044W	IRC23	irc23	0.03648	0.456901	0.04937	0.524373	-0.02971	-0.471439
YCR092C	MSH3	msh3	-0.01072	-0.225205	-0.12386	-1.78739	-0.02966	-0.470807
YPL130W	SPO19	spo19	0.00895	0.0590537	-0.01426	-0.324774	-0.02962	-0.470301
YLR438W	CAR2	car2	0.00635	0.02148	0.00584	-0.056538	-0.02961	-0.470174
YGR040W	KSS1	kss1	-0.03672	-0.600942	-0.06388	-0.986956	-0.02959	-0.469921
YHR031C	RRM3	rrm3	-0.13269	-1.98784	-0.00135	-0.152489	-0.02959	-0.469921
YHL017W	YHL017W	yhl017w	-0.01676	-0.312492	-0.03702	-0.628507	-0.02955	-0.469415
YGL104C	VPS73	vps73	-0.08559	-1.30718	-0.00271	-0.170638	-0.02954	-0.469289
YBR060C	ORC2	orc2-3	-0.06113	-0.953701	-0.19329	-2.71394	-0.02951	-0.468909
YOR040W	GLO4	glo4	-0.00075	-0.0811249	0.08734	1.03108	-0.02944	-0.468024
YDR531W	CAB1	cab1-ph	-0.06523	-1.01295	-0.05059	-0.8096	-0.02941	-0.467644
YGR238C	KEL2	kel2	-0.02369	-0.41264	-0.07456	-1.12948	-0.02939	-0.467391
YHR045W	YHR045W	yhr045w	-0.03469	-0.571606	-0.06631	-1.01938	-0.02938	-0.467265
YOR283W	YOR283W	yor283w	-0.08205	-1.25602	0.03433	0.323663	-0.02936	-0.467012
YKR050W	TRK2	trk2	-0.01901	-0.345008	-0.05402	-0.855374	-0.02927	-0.465873
YGL161C	YIP5	yip5	0.0179	0.188394	0.02903	0.252934	-0.02926	-0.465747
YMR255W	GFD1	gfd1	0.00059	-0.0617601	0.04917	0.521704	-0.0292	-0.464988
YGL087C	MMS2	mms2	-0.02506	-0.432439	-0.09502	-1.40252	-0.02919	-0.464861
YML100W	TSL1	tsl1	-0.03963	-0.642996	-0.00935	-0.25925	-0.02918	-0.464735
YPL086C	ELP3	elp3	-0.03246	-0.539379	0.02402	0.186075	-0.02914	-0.464229
YHR033W	YHR033W	yhr033w	-0.01154	-0.237056	0.00174	-0.111253	-0.02912	-0.463976
YPR021C	AGC1	agc1	0.02725	0.323514	0.00397	-0.0814933	-0.02911	-0.463849
YPL098C	MGR2	mgr2	-0.04989	-0.791267	0.00209	-0.106582	-0.02905	-0.46309
YKR045C	YKR045C	ykr045c	-0.02926	-0.493135	0.03159	0.287097	-0.02904	-0.462964
YFL034C-B	MOB2	mob2-26	-0.0165	-0.308735	-0.13742	-1.96835	-0.02899	-0.462331
YOR161C	PNS1	pns1	-0.02044	-0.365673	0.00533	-0.063344	-0.02898	-0.462205
YLR351C	NIT3	nit3	-0.02787	-0.473047	-0.06473	-0.998299	-0.02897	-0.462078
YLR137W	RKM5	rkm5	-0.02455	-0.425068	0.03859	0.380513	-0.02888	-0.46094
YLR211C	YLR211C	ylr211c	-0.03967	-0.643574	-0.04122	-0.684557	-0.02882	-0.460181
YOR280C	FSH3	fsh3	-0.02753	-0.468134	0.02503	0.199554	-0.0288	-0.459928
YPR086W	SUA7	sua7-c149r	-0.03308	-0.548339	0.09889	1.18522	-0.0288	-0.459928
YLR070C	XYL2	xyl2	-0.01773	-0.32651	-0.03754	-0.635447	-0.02879	-0.459801
YMR030W	RSF1	rsf1	0.01052	0.0817424	0.11629	1.41742	-0.02879	-0.459801
YNL053W	MSG5	msg5	-0.01923	-0.348187	0.01518	0.0681049	-0.02876	-0.459422
YDR473C	PRP3	prp3-1	-0.06843	-1.0592	0.07084	0.810891	-0.02871	-0.458789
YGL022W	STT3	stt3-2	0.04254	0.544477	-0.01509	-0.33585	-0.02869	-0.458536
YBR018C	GAL7	gal7	-0.01807	-0.331423	-0.03136	-0.552974	-0.02867	-0.458283
YOR050C	YOR050C	yor050c	0.01884	0.201978	0.04748	0.49915	-0.02867	-0.458283
YOR224C	RPB8	rpb8-ph	-0.03129	-0.522471	0.03799	0.372506	-0.02865	-0.45803
YOL090W	MSH2	msh2	-0.03585	-0.588369	-0.47896	-6.52623	-0.02849	-0.456006
YHL040C	ARN1	arn1	0.01408	0.133189	-0.0305	-0.541498	-0.02844	-0.455374
YBL067C	UBP13	ubp13	-0.00663	-0.166099	0.01973	0.128825	-0.02842	-0.455121
YBR198C	TAF5	taf5-20	0.06885	0.924693	0.059	0.652886	-0.0284	-0.454868
YDR445C	YDR445C	ydr445c	-0.00989	-0.213211	-0.04449	-0.728195	-0.02836	-0.454362
YPR079W	MRL1	mrl1	0.10143	1.39552	0.03218	0.294971	-0.02836	-0.454362
YBR150C	TBS1	tbs1	-0.01455	-0.280554	-0.04077	-0.678551	-0.02828	-0.45335
YBR240C	THI2	thi2	-0.03572	-0.586491	-0.04169	-0.690829	-0.02822	-0.452591
YBR145W	ADH5	adh5	-0.00128	-0.0887842	-0.01961	-0.39617	-0.02822	-0.452591
YPL103C	FMP30	fmp30	-0.04617	-0.737508	-0.02848	-0.514541	-0.02818	-0.452085
YLR049C	YLR049C	ylr049c	-0.06923	-1.07076	-0.21522	-3.0066	-0.02816	-0.451832
YKL090W	CUE2	cue2	-0.02511	-0.433161	0.02658	0.220239	-0.02809	-0.450946
YIL032C	YIL032C	yil032c	-0.02043	-0.365529	-0.04862	-0.78331	-0.02805	-0.45044
YKL063C	YKL063C	ykl063c	-0.01198	-0.243414	0.00847	-0.0214405	-0.02793	-0.448922
YDR368W	YPR1	ypr1	0.00183	-0.0438403	-0.00942	-0.260184	-0.02792	-0.448796
YJR005W	APL1	apl1	0.00375	-0.0160936	0.02569	0.208361	-0.02788	-0.44829
YER163C	GCG1	gcg1	-0.03232	-0.537356	0.05145	0.55213	-0.02778	-0.447025
YKL167C	MRP49	mrp49	-0.09967	-1.51066	-0.03441	-0.593677	-0.02774	-0.446519
YLR459W	GAB1	gab1-1	-0.04821	-0.766989	0.06292	0.705198	-0.02772	-0.446266
YIL155C	GUT2	gut2	0.03314	0.408633	0.04267	0.434961	-0.02769	-0.445886
YIL096C	YIL096C	yil096c	-0.06834	-1.0579	-0.02574	-0.477975	-0.02766	-0.445507
YDR157W	YDR157W	ydr157w	-0.01297	-0.257721	-0.0365	-0.621568	-0.02764	-0.445254
YGR094W	YGR094W	ygr094w-ph	-0.03058	-0.51221	-0.12502	-1.80287	-0.0276	-0.444748
YNR014W	YNR014W	ynr014w	-0.00622	-0.160174	-0.02243	-0.433803	-0.02756	-0.444242
YDR242W	AMD2	amd2	0.0743	1.00345	-0.00298	-0.174242	-0.02755	-0.444115
YLR013W	GAT3	gat3	-0.01106	-0.230119	0.02051	0.139234	-0.02749	-0.443356
YDR060W	MAK21	mak21-3	-0.05194	-0.820893	-0.00432	-0.192124	-0.02743	-0.442597
YIL166C	YIL166C	yil166c	-0.06058	-0.945753	0.00496	-0.0682817	-0.02735	-0.441585
YKR021W	ALY1	aly1	-0.00975	-0.211188	-0.00193	-0.160229	-0.02734	-0.441459
YMR162C	DNF3	dnf3	-0.04807	-0.764966	0.02082	0.143371	-0.02729	-0.440826
YDL188C	PPH22	pph22	-0.01365	-0.267548	-0.06702	-1.02886	-0.02726	-0.440447
YGR033C	TIM21	tim21	-0.03158	-0.526662	0.0119	0.0243331	-0.02723	-0.440067
YGR233C	PHO81	pho81	-0.01703	-0.316394	0.0318	0.2899	-0.02715	-0.439055
YBL070C	YBL070C	ybl070c	-0.01135	-0.23431	-0.02693	-0.493856	-0.02713	-0.438802
YBR253W	SRB6	srb6-ph	0.034	0.421061	0.00829	-0.0238426	-0.02713	-0.438802
YKL092C	BUD2	bud2	-0.00625	-0.160608	0.05098	0.545858	-0.02712	-0.438676
YLR233C	EST1	est1	-0.02535	-0.43663	0.02785	0.237187	-0.02709	-0.438296
YKL145W	RPT1	rpt1-1	-0.02067	-0.368997	0.03073	0.275621	-0.02709	-0.438296
YOL063C	CRT10	crt10	-0.0307	-0.513945	-0.01818	-0.377086	-0.02692	-0.436146
YDR317W	HIM1	him1	-0.03166	-0.527818	-0.00981	-0.265388	-0.02689	-0.435766
YMR153W	NUP53	nup53	-0.02858	-0.483308	-0.00324	-0.177711	-0.02687	-0.435513
YOR051C	ETT1	ett1	-0.05226	-0.825517	0.00684	-0.043193	-0.02681	-0.434754
YOR167C	RPS28A	rps28a	-0.0386	-0.628111	-0.03239	-0.56672	-0.0268	-0.434628
YPL026C	SKS1	sks1	0.7168	10.2885	-0.06102	-0.948789	-0.02675	-0.433995
YIL025C	YIL025C	yil025c	-0.0021	-0.100634	-0.01222	-0.29755	-0.02675	-0.433995
YKR011C	YKR011C	ykr011c	-0.02158	-0.382148	-0.01929	-0.3919	-0.02673	-0.433742
YDL238C	GUD1	gud1	-0.01711	-0.31755	-0.02386	-0.452886	-0.02672	-0.433616
YKL051W	SFK1	sfk1	-0.09688	-1.47034	-0.11424	-1.65901	-0.02669	-0.433236
YIL010W	DOT5	dot5	0.0009	-0.0572801	-0.01421	-0.324107	-0.02666	-0.432857
YBR178W	YBR178W	ybr178w	-0.0347	-0.57175	-0.01402	-0.321571	-0.0266	-0.432098
YHR107C	CDC12	cdc12-1	0.02127	0.237095	-0.14257	-2.03708	-0.02658	-0.431845
YOL003C	PFA4	pfa4	0.01837	0.195186	-0.00273	-0.170905	-0.02658	-0.431845
YOL046C	YOL046C	yol046c	-0.00146	-0.0913854	-0.04993	-0.800792	-0.02656	-0.431592
YMR105C	PGM2	pgm2	-0.02349	-0.40975	-0.00853	-0.248307	-0.02656	-0.431592
YKR096W	ESL2	esl2	-0.02067	-0.368997	-0.01677	-0.35827	-0.02655	-0.431465
YPL041C	YPL041C	ypl041c	-0.17147	-2.54827	0.1409	1.74585	-0.02655	-0.431465
YDR428C	BNA7	bna7	-0.03278	-0.544004	0.04015	0.401331	-0.0265	-0.430833
YGR209C	TRX2	trx2	-0.00392	-0.126936	-0.02582	-0.479043	-0.02649	-0.430706
YJL037W	IRC18	irc18	-0.00672	-0.1674	-0.01929	-0.3919	-0.02649	-0.430706
YLR292C	SEC72	sec72	-0.02067	-0.368997	0.05966	0.661693	-0.02649	-0.430706
YPL207W	TYW1	tyw1	0.01011	0.0758173	0.03429	0.323129	-0.02647	-0.430453
YKR054C	DYN1	dyn1	-0.07375	-1.13608	0.00974	-0.00449229	-0.02646	-0.430327
YGR279C	SCW4	scw4	0.00472	-0.00207575	0.07472	0.86267	-0.02644	-0.430074
YGL054C	ERV14	erv14	-0.02342	-0.408738	-0.05368	-0.850836	-0.02642	-0.429821
YIL042C	PKP1	pkp1	-0.00674	-0.167689	-0.04378	-0.71872	-0.02635	-0.428935
YFR032C	RRT5	rrt5	-0.12323	-1.85113	-0.05096	-0.814538	-0.02629	-0.428176
YOR266W	PNT1	pnt1	0.01553	0.154144	0.06373	0.716008	-0.02629	-0.428176
YLR124W	YLR124W	ylr124w	-0.0094	-0.20613	-0.0284	-0.513473	-0.02628	-0.42805
YDR201W	SPC19	spc19-ph	0.0262	0.30834	0.02315	0.174465	-0.02625	-0.42767
YLR453C	RIF2	rif2	-0.00526	-0.146301	-0.05047	-0.807999	-0.02617	-0.426658
YAL015C	NTG1	ntg1	-0.02026	-0.363072	-0.00402	-0.18812	-0.02609	-0.425646
YNR033W	ABZ1	abz1	-0.02195	-0.387495	0.0036	-0.086431	-0.02609	-0.425646
YMR303C	ADH2	adh2	-0.01605	-0.302231	0.00493	-0.068682	-0.02601	-0.424634
YMR277W	FCP1	fcp1-1	-0.01769	-0.325932	-0.03276	-0.571658	-0.02584	-0.422484
YHR021W-A	ECM12	ecm12	-0.01337	-0.263502	0.0012	-0.118459	-0.02584	-0.422484
YOR170W	YOR170W	yor170w	-0.00636	-0.162197	-0.02155	-0.422059	-0.02582	-0.422231
YFL044C	OTU1	otu1	-0.02887	-0.487499	-0.02903	-0.52188	-0.02577	-0.421598
YDL146W	LDB17	ldb17	0.01137	0.0940261	0.01678	0.089457	-0.02573	-0.421092
YML059C	NTE1	nte1	-0.01532	-0.291682	0.02867	0.24813	-0.02572	-0.420966
YBR247C	ENP1	enp1-1	0.00728	0.0349199	0.07448	0.859467	-0.02572	-0.420966
YOR083W	WHI5	whi5	-0.02479	-0.428537	-0.1	-1.46898	-0.0257	-0.420713
YGR277C	CAB4	cab4-ph	-0.01848	-0.337348	0.01035	0.0036482	-0.02564	-0.419954
YBR193C	MED8	med8-51	-0.03806	-0.620307	0.02148	0.152179	-0.02554	-0.418689
YNL062C	GCD10	gcd10-506	-0.06452	-1.00269	0.04295	0.438697	-0.02554	-0.418689
YOR177C	MPC54	mpc54	-0.0339	-0.560189	-0.04247	-0.701238	-0.0255	-0.418183
YPL139C	UME1	ume1	-0.89844	-13.054	0.03606	0.34675	-0.02549	-0.418056
YLR460C	YLR460C	ylr460c	0.03001	0.3634	-0.04319	-0.710847	-0.02546	-0.417677
YFL034C-B	MOB2	mob2-38	-0.03393	-0.560623	-0.00826	-0.244703	-0.02544	-0.417424
YBR123C	TFC1	tfc1-e447k	0.0041	-0.0110356	-0.02863	-0.516542	-0.02539	-0.416791
YLR231C	BNA5	bna5	-0.05887	-0.921041	-0.09529	-1.40612	-0.02533	-0.416032
YMR191W	SPG5	spg5	0.00627	0.0203239	-0.01049	-0.274463	-0.0253	-0.415653
YMR031W	YMR031W	ymr031w-a	0.03308	0.407766	-0.1142	-1.65848	-0.02528	-0.4154
YJL100W	LSB6	lsb6	-0.01909	-0.346164	0.02752	0.232783	-0.02526	-0.415147
YIL023C	YKE4	yke4	-0.03099	-0.518136	-0.02645	-0.48745	-0.02525	-0.41502
YNL020C	ARK1	ark1	0.00925	0.0633891	-0.01144	-0.287141	-0.02525	-0.41502
YHR049C	YHR049C	yhr049c-a	-0.01215	-0.245871	-0.04376	-0.718453	-0.02518	-0.414135
YNL035C	YNL035C	ynl035c	0.01218	0.105732	-0.05329	-0.845632	-0.0251	-0.413123
YKR034W	DAL80	dal80	-0.01932	-0.349488	0.01837	0.110676	-0.02506	-0.412617
YFL034C-B	MOB2	mob2-20	0.12275	1.70362	0.14321	1.77667	-0.02501	-0.411984
YDR362C	TFC6	tfc6-m1	-0.00307	-0.114652	-0.08993	-1.33459	-0.02491	-0.410719
YKL189W	HYM1	hym1-15	-0.06222	-0.969453	-0.0329	-0.573526	-0.02491	-0.410719
YNR020C	ATP23	atp23	0.00994	0.0733606	-0.00276	-0.171306	-0.02488	-0.41034
YPL184C	MRN1	mrn1	0.001	-0.055835	-0.00151	-0.154624	-0.02484	-0.409834
YMR153C	YMR153C	ymr153c-a	-0.01026	-0.218558	0.04964	0.527976	-0.02479	-0.409201
YLR347C	KAP95	kap95-e126k	-0.02902	-0.489666	-0.05104	-0.815605	-0.02478	-0.409075
YMR107W	SPG4	spg4	-0.00942	-0.206419	-0.02303	-0.44181	-0.02476	-0.408822
YMR234W	RNH1	rnh1	0.01265	0.112524	-0.02607	-0.482379	-0.02469	-0.407936
YGR003W	CUL3	cul3	0.04529	0.584218	0.05919	0.655421	-0.02468	-0.40781
YHR171W	ATG7	atg7	-0.00794	-0.185031	-0.03447	-0.594478	-0.02465	-0.40743
YLR045C	STU2	stu2-12	-0.02915	-0.491545	-0.18707	-2.63093	-0.02464	-0.407304
YOR370C	MRS6	mrs6-2	-0.03597	-0.590104	-0.04472	-0.731264	-0.02462	-0.407051
YLR319C	BUD6	bud6	0.001465	-0.0491151	0.038485	0.379112	-0.024615	-0.406988
YBR125C	PTC4	ptc4	-0.01684	-0.313648	0.01534	0.0702401	-0.02457	-0.406418
YLR188W	MDL1	mdl1	-0.02473	-0.42767	-0.01956	-0.395503	-0.02455	-0.406165
YMR007W	YMR007W	ymr007w	-0.01447	-0.279398	0.03999	0.399196	-0.02452	-0.405786
YKR097W	PCK1	pck1	0.11129	1.53801	0.1583	1.97805	-0.02448	-0.40528
YOL091W	SPO21	spo21	-0.00586	-0.154972	0.0092	-0.0116986	-0.02447	-0.405153
YMR101C	SRT1	srt1	0.00905	0.0604988	-0.00317	-0.176777	-0.02446	-0.405027
YPR071W	YPR071W	ypr071w	-0.03072	-0.514234	-0.04882	-0.785979	-0.02442	-0.404521
YGR154C	GTO1	gto1	-0.04212	-0.67898	-0.03956	-0.662404	-0.02437	-0.403888
YOL114C	YOL114C	yol114c	-0.02916	-0.491689	0.03692	0.358227	-0.02437	-0.403888
YOR166C	SWT1	swt1	-0.01928	-0.34891	-0.04768	-0.770766	-0.02435	-0.403635
YLR173W	YLR173W	ylr173w	-0.00972	-0.210754	0.05119	0.548661	-0.02433	-0.403382
YLL015W	BPT1	bpt1	-0.00391	-0.126791	0.02285	0.170462	-0.02432	-0.403256
YGL229C	SAP4	sap4	-0.01486	-0.285034	0.00035	-0.129802	-0.02431	-0.403129
YGR223C	HSV2	hsv2	-0.03137	-0.523627	-0.02778	-0.505199	-0.02427	-0.402623
YCL026C-A	FRM2	frm2	-0.00183	-0.0967325	0.04752	0.499684	-0.02427	-0.402623
YIR036C	IRC24	irc24	-0.03632	-0.595162	-0.03399	-0.588072	-0.02417	-0.401358
YPL112C	PEX25	pex25	0.0071	0.0323186	0.02542	0.204758	-0.02411	-0.400599
YER176W	ECM32	ecm32	-0.01346	-0.264802	-0.05656	-0.88927	-0.02408	-0.40022
YFR012W	DCV1	dcv1	-0.04843	-0.770168	-0.03404	-0.588739	-0.02408	-0.40022
YNR013C	PHO91	pho91	0.00545	0.00847378	-0.02587	-0.47971	-0.02407	-0.400093
YML090W	YML090W	yml090w	0.00922	0.0629556	-0.01907	-0.388964	-0.02396	-0.398702
YAL027W	SAW1	saw1	-0.01061	-0.223616	0.02523	0.202223	-0.02396	-0.398702
YLR015W	BRE2	bre2	-0.02888	-0.487643	-0.01846	-0.380823	-0.02394	-0.398449
YOR334W	MRS2	mrs2	0.02269	0.257616	0.00606	-0.0536021	-0.02393	-0.398322
YFR030W	MET10	met10	-0.06816	-1.05529	-0.11627	-1.6861	-0.02389	-0.397816
YBR245C	ISW1	isw1	-0.00808	-0.187054	-0.01433	-0.325708	-0.02388	-0.39769
YDR486C	VPS60	vps60	0.01846	0.196487	0.09727	1.1636	-0.02386	-0.397437
YAL062W	GDH3	gdh3	-0.0452	-0.72349	-0.02592	-0.480377	-0.02385	-0.39731
YCL074W	YCL074W	ycl074w	0.00634	0.0213355	0.01158	0.0200626	-0.02384	-0.397184
YMR166C	YMR166C	ymr166c	-0.04143	-0.669008	-0.29419	-4.06046	-0.02382	-0.396931
YBR138C	YBR138C	ybr138c	-0.02017	-0.361771	-0.03586	-0.613027	-0.02382	-0.396931
YLR116W	MSL5	msl5-ph	0.04316	0.553436	0.00894	-0.0151683	-0.02378	-0.396425
YGL077C	HNM1	hnm1	-0.04771	-0.759763	0.01377	0.0492883	-0.02374	-0.395919
YKL121W	DGR2	dgr2	-0.0323	-0.537067	-0.01414	-0.323172	-0.02373	-0.395792
YGL179C	TOS3	tos3	0.0162	0.163826	0.02931	0.256671	-0.02371	-0.395539
YHR188C	GPI16	gpi16-ph	0.05552	0.732056	0.01941	0.124554	-0.0237	-0.395413
YDL091C	UBX3	ubx3	-0.00787	-0.184019	-0.02064	-0.409915	-0.02369	-0.395286
YFR024C-A	YFR024C	yfr024c	0.00162	-0.0468751	0.01859	0.113612	-0.02369	-0.395286
YMR294W	JNM1	jnm1	-0.00236	-0.104392	0.09663	1.15506	-0.02365	-0.39478
YKL214C	YRA2	yra2	-0.03024	-0.507297	-0.04632	-0.752617	-0.02364	-0.394654
YGR288W	MAL13	mal13	-0.00911	-0.201939	0.04563	0.474462	-0.02355	-0.393515
YJR128W	YJR128W	yjr128w	-0.0343	-0.56597	-0.03509	-0.602752	-0.02353	-0.393262
YJR146W	YJR146W	yjr146w	0.00512	0.00370482	0.03149	0.285763	-0.02352	-0.393136
YMR182C	RGM1	rgm1	-0.00189	-0.0975996	-0.0296	-0.529487	-0.02348	-0.39263
YBR255W	MTC4	mtc4	-0.04366	-0.701235	-0.02793	-0.507201	-0.02348	-0.39263
YBR137W	YBR137W	ybr137w	-0.01649	-0.30859	0.0286	0.247196	-0.02341	-0.391744
YGR206W	MVB12	mvb12	0.03604	0.450542	0.02153	0.152846	-0.0234	-0.391618
YDL103C	QRI1	qri1-ts6	0.02385	0.27438	0.15326	1.91079	-0.02339	-0.391491
YDL155W	CLB3	clb3	0.04863	0.632486	0.04009	0.40053	-0.02338	-0.391365
YCL063W	VAC17	vac17	0.00603	0.0168556	0.0424	0.431358	-0.0233	-0.390353
YKR066C	CCP1	ccp1	-0.01433	-0.277375	0.04229	0.42989	-0.02329	-0.390226
YDL066W	IDP1	idp1	0.00427	-0.00857888	-0.03277	-0.571791	-0.02325	-0.38972
YKL045W	PRI2	pri2-1	-0.30656	-4.50051	0.08949	1.05978	-0.02321	-0.389214
YGR242W	YGR242W	ygr242w	-0.02375	-0.413507	-0.03953	-0.662004	-0.0232	-0.389088
YCR024C-A	PMP1	pmp1	-0.01875	-0.34125	-0.20706	-2.8977	-0.02318	-0.388835
YFR055W	IRC7	irc7	-0.02224	-0.391686	-0.02111	-0.416188	-0.02314	-0.388329
YDR491C	YDR491C	ydr491c	-0.00125	-0.0883507	-0.10398	-1.52209	-0.02313	-0.388202
YML049C	RSE1	rse1-1	-0.03199	-0.532587	0.05752	0.633135	-0.02312	-0.388076
YGR118W	RPS23A	rps23a	-0.01403	-0.27304	0.06357	0.713873	-0.02312	-0.388076
YJL059W	YHC3	yhc3	-0.03709	-0.606289	0.0038	-0.083762	-0.02306	-0.387317
YJL168C	SET2	set2	-0.029435	-0.495664	-0.06787	-1.0402	-0.022995	-0.386495
YOR114W	YOR114W	yor114w	-0.02101	-0.37391	0.04407	0.453644	-0.02299	-0.386431
YCR014C	POL4	pol4	-0.05637	-0.884912	-0.04589	-0.746878	-0.02296	-0.386052
YAR023C	YAR023C	yar023c	0.00091	-0.0571356	-0.02471	-0.46423	-0.02296	-0.386052
YKL064W	MNR2	mnr2	-0.01627	-0.305411	0.03144	0.285096	-0.02292	-0.385546
YLR455W	YLR455W	ylr455w	0.02197	0.247211	-0.015965	-0.347527	-0.022915	-0.385483
YGL224C	SDT1	sdt1	0.06285	0.837985	0.03443	0.324997	-0.02291	-0.385419
YDR001C	NTH1	nth1	-0.04124	-0.666262	-0.04722	-0.764627	-0.02284	-0.384534
YGL163C	RAD54	rad54	-0.01235	-0.248761	-0.015965	-0.347527	-0.022825	-0.384344
YDR424C	DYN2	dyn2	-0.01248	-0.25064	0.02737	0.230781	-0.02273	-0.383142
YMR036C	MIH1	mih1	0.01025	0.0778405	0.04368	0.448439	-0.0227	-0.382763
YOR071C	NRT1	nrt1	-0.02728	-0.464521	-0.05186	-0.826548	-0.02269	-0.382636
YBR222C	PCS60	pcs60	-0.03266	-0.542269	0.02154	0.152979	-0.02268	-0.38251
YJR021C	REC107	rec107	-0.01623	-0.304833	-0.02296	-0.440876	-0.02266	-0.382257
YJL197W	UBP12	ubp12	0.00286	-0.0289554	0.03166	0.288032	-0.02266	-0.382257
YBR095C	RXT2	rxt2	-0.039945	-0.647548	0.035055	0.333338	-0.02263	-0.381877
YOL025W	LAG2	lag2	-0.04194	-0.676378	-0.07766	-1.17085	-0.02258	-0.381245
YGR031W	IMO32	imo32	-0.01338	-0.263646	0.06977	0.796612	-0.02257	-0.381118
YBR238C	YBR238C	ybr238c	-0.02233	-0.392986	-0.08131	-1.21956	-0.02256	-0.380992
YCR082W	AHC2	ahc2	0.01393	0.131022	-0.00217	-0.163432	-0.02253	-0.380612
YLL048C	YBT1	ybt1	-0.00874	-0.196592	-0.00085	-0.145817	-0.02252	-0.380486
YJL159W	HSP150	hsp150	-0.03129	-0.522471	-0.01105	-0.281936	-0.02251	-0.380359
YLR450W	HMG2	hmg2	0.00705	0.031596	-0.00283	-0.17224	-0.02251	-0.380359
YLL024C	SSA2	ssa2	-0.00903	-0.200783	-0.03532	-0.605821	-0.02249	-0.380106
YHR078W	YHR078W	yhr078w	-0.01749	-0.323042	-0.09722	-1.43188	-0.02247	-0.379853
YFR057W	YFR057W	yfr057w	0.01159	0.0972054	-0.012	-0.294614	-0.02244	-0.379474
YDL033C	SLM3	slm3	0.01985	0.216574	0.03464	0.3278	-0.02241	-0.379094
YOL098C	YOL098C	yol098c	-0.02759	-0.469001	-0.03116	-0.550305	-0.02239	-0.378841
YCL064C	CHA1	cha1	0.00761	0.0396888	-0.00145	-0.153824	-0.02237	-0.378588
YDR489W	SLD5	sld5-ph	-0.08627	-1.31701	0.00798	-0.0279796	-0.02234	-0.378209
YKR103W	NFT1	nft1	-0.01404	-0.273184	-0.01425	-0.32464	-0.02232	-0.377956
YBR103W	SIF2	sif2	-0.02814	-0.476949	0.01825	0.109074	-0.02228	-0.37745
YMR117C	SPC24	spc24-9	0.01811	0.191429	0.02172	0.155382	-0.02225	-0.37707
YJL002C	OST1	ost1-6	-0.04098	-0.662505	-0.01559	-0.342523	-0.02224	-0.376944
YDL114W	YDL114W	ydl114w	-0.01601	-0.301653	0.02776	0.235986	-0.02222	-0.376691
YKL085W	MDH1	mdh1	0.01719	0.178133	-0.03088	-0.546569	-0.0222	-0.376438
YLR252W	YLR252W	ylr252w	-0.02121	-0.376801	0.032	0.292569	-0.02217	-0.376058
YLR216C	CPR6	cpr6	-0.052	-0.82176	-0.02156	-0.422193	-0.02212	-0.375426
YKL114C	APN1	apn1	-0.04363	-0.700801	-0.0685	-1.04861	-0.0221	-0.375173
YHR039C	MSC7	msc7	-0.03827	-0.623342	0.02522	0.202089	-0.02209	-0.375046
YHR121W	LSM12	lsm12	-0.02383	-0.414663	-0.0247	-0.464096	-0.02208	-0.37492
YOL117W	RRI2	rri2	-0.01416	-0.274918	-0.00568	-0.210273	-0.02206	-0.374667
YKR027W	BCH2	bch2	0.01436	0.137236	0.02418	0.18821	-0.02205	-0.37454
YBR227C	MCX1	mcx1	-0.01459	-0.281132	-0.06401	-0.988691	-0.02201	-0.374034
YGR028W	MSP1	msp1	-0.00433	-0.132861	-0.03932	-0.659201	-0.02197	-0.373528
YLR142W	PUT1	put1	-0.021	-0.373766	0.07567	0.875348	-0.02195	-0.373275
YKR052C	MRS4	mrs4	0.01062	0.0831876	-0.01973	-0.397771	-0.02194	-0.373149
YHR132C	ECM14	ecm14	-0.02931	-0.493857	0.01482	0.0633006	-0.02194	-0.373149
YCL033C	MXR2	mxr2	-0.01566	-0.296595	-0.0116	-0.289276	-0.02193	-0.373022
YGL211W	NCS6	ncs6	-0.01371	-0.268415	0.0936	1.11462	-0.02191	-0.372769
YOR080W	DIA2	dia2	-0.12557	-1.88495	0.04655	0.48674	-0.02187	-0.372263
YDR516C	EMI2	emi2	-0.02127	-0.377668	-0.0288	-0.518811	-0.02178	-0.371125
YHR140W	YHR140W	yhr140w	-0.01484	-0.284745	-0.02128	-0.418456	-0.02168	-0.36986
YCR088W	ABP1	abp1	-0.02788	-0.473192	-0.03112	-0.549772	-0.02161	-0.368974
YLR005W	SSL1	ssl1-ph	0.0039	-0.0139259	-0.04302	-0.708578	-0.02158	-0.368595
YDL105W	NSE4	nse4-ts1	-0.00309	-0.114941	0.02557	0.20676	-0.02158	-0.368595
YLR257W	YLR257W	ylr257w	-0.0092	-0.203239	-0.05375	-0.85177	-0.02157	-0.368468
YER167W	BCK2	bck2	-0.00437	-0.133439	0.0827	0.969164	-0.02157	-0.368468
YLR135W	SLX4	slx4	-0.02124	-0.377234	-0.01206	-0.295415	-0.02153	-0.367962
YBL061C	SKT5	skt5	-0.01963	-0.353968	0.00738	-0.0359866	-0.02153	-0.367962
YKL050C	YKL050C	ykl050c	-0.09271	-1.41008	-0.05491	-0.867251	-0.02152	-0.367836
YIL117C	PRM5	prm5	-0.02601	-0.446168	0.02319	0.174999	-0.02151	-0.367709
YDR235W	PRP42	prp42-ph	0.07088	0.954029	0.05035	0.537451	-0.02151	-0.367709
YHR036W	BRL1	brl1-k405i	-0.02535	-0.43663	0.01485	0.063701	-0.02149	-0.367456
YGR205W	TDA10	tda10	0.00194	-0.0422507	0.00786	-0.029581	-0.02147	-0.367203
YPL067C	YPL067C	ypl067c	0.00475	-0.00164221	0.03493	0.33167	-0.02143	-0.366697
YGL079W	KXD1	kxd1	0.07138	0.961255	-0.01653	-0.355067	-0.02139	-0.366191
YDR016C	DAD1	dad1-ph	-0.00501	-0.142688	-0.06762	-1.03687	-0.02135	-0.365685
YJL187C	SWE1	swe1	-0.12791	-1.91877	-0.02352	-0.448349	-0.02132	-0.365306
YJL112W	MDV1	mdv1	-0.00163	-0.0938422	0.00023	-0.131404	-0.02132	-0.365306
YOL080C	REX4	rex4	-0.00044	-0.076645	-0.00874	-0.251109	-0.02131	-0.365179
YML048W	YML048W	yml048w-a	-0.01565	-0.296451	0.05873	0.649282	-0.0213	-0.365053
YJL058C	BIT61	bit61	-0.0018	-0.0962989	0.01019	0.00151299	-0.02129	-0.364926
YNL126W	SPC98	spc98-ph	-0.03139	-0.523916	-0.12381	-1.78673	-0.02128	-0.3648
YPL136W	YPL136W	ypl136w	-0.07941	-1.21787	0.01935	0.123754	-0.02128	-0.3648
YHR007C	ERG11	erg11-td	-0.04083	-0.660337	-0.08518	-1.27121	-0.02127	-0.364673
YIL099W	SGA1	sga1	0.00373	-0.0163826	-0.00197	-0.160763	-0.02126	-0.364547
YJL016W	YJL016W	yjl016w	-0.00845	-0.192401	-0.05301	-0.841895	-0.02125	-0.36442
YDR109C	YDR109C	ydr109c	0.00031	-0.0658065	-0.06394	-0.987757	-0.02121	-0.363914
YKL157W	YKL158W	ykl158w	0.03128	0.381754	-0.00538	-0.20627	-0.02111	-0.362649
YGR286C	BIO2	bio2	0.02116	0.235505	0.00089	-0.122596	-0.0211	-0.362523
YDR382W	RPP2B	rpp2b	-0.05789	-0.906878	-0.06696	-1.02806	-0.02109	-0.362396
YMR002W	MIC17	mic17	-0.00044	-0.076645	-0.06153	-0.955595	-0.02109	-0.362396
YKR013W	PRY2	pry2	-0.03874	-0.630134	-0.06933	-1.05969	-0.02108	-0.36227
YKL027W	YKL027W	ykl027w	-0.00642	-0.163064	0.07186	0.824503	-0.02105	-0.36189
YAL064C-A	TDA8	tda8	-0.01074	-0.225495	-0.06246	-0.968006	-0.021	-0.361258
YLR265C	NEJ1	nej1	-0.02417	-0.419577	-0.00173	-0.15756	-0.02099	-0.361131
YDL140C	RPO21	rpo21-1	0.0035	-0.0197065	0.07346	0.845855	-0.02099	-0.361131
YDR052C	DBF4	dbf4-1	-0.06894	-1.06657	-0.01512	-0.336251	-0.02098	-0.361005
YKL202W	YKL202W	ykl202w	-0.01559	-0.295584	-0.02441	-0.460226	-0.02094	-0.360499
YCL061C	YCL060C	ycl060c	-0.10264	-1.55358	-0.24171	-3.36011	-0.0209	-0.359993
YOL032W	OPI10	opi10	0.01068	0.0840546	-0.05213	-0.830151	-0.02085	-0.35936
YLR133W	CKI1	cki1	-0.02401	-0.417265	0.02222	0.162054	-0.02074	-0.357969
YMR053C	STB2	stb2	-0.01921	-0.347898	-0.06049	-0.941716	-0.02073	-0.357842
YOL083W	ATG34	atg34	0.00353	-0.0192729	-0.0362	-0.617565	-0.02073	-0.357842
YLR408C	BLS1	bls1	0.0233	0.266431	-0.05438	-0.860178	-0.02069	-0.357336
YNR042W	YNR042W	ynr042w	-0.01274	-0.254397	-0.01906	-0.38883	-0.02069	-0.357336
YLR324W	PEX30	pex30	0.01209	0.104431	0.01401	0.0524911	-0.02069	-0.357336
YHR103W	SBE22	sbe22	0.00221	-0.0383488	0.00701	-0.0409243	-0.02068	-0.35721
YBR269C	FMP21	fmp21	0.02518	0.2936	0.05973	0.662627	-0.02065	-0.35683
YLL006W	MMM1	mmm1	0.05046	0.658932	0.09818	1.17575	-0.02064	-0.356704
YIL141W	YIL141W	yil141w	-0.02882	-0.486776	0.00797	-0.0281131	-0.02062	-0.356451
YGL132W	YGL132W	ygl132w	-0.04172	-0.673199	-0.05764	-0.903683	-0.02058	-0.355945
YCR076C	FUB1	fub1	-0.06118	-0.954424	0.05056	0.540253	-0.02058	-0.355945
YBL057C	PTH2	pth2	-0.0078	-0.183007	-0.02729	-0.49866	-0.02051	-0.355059
YIL161W	YIL161W	yil161w	-0.00158	-0.0931196	-0.04193	-0.694032	-0.02048	-0.35468
YBL048W	YBL048W	ybl048w	-0.01811	-0.332001	-0.03148	-0.554576	-0.02048	-0.35468
YDR314C	RAD34	rad34	-0.00613	-0.158874	-0.06131	-0.952659	-0.02047	-0.354553
YOR252W	TMA16	tma16	0.21643	3.05743	0.01702	0.0926598	-0.02045	-0.3543
YOR141C	ARP8	arp8	-0.04578	-0.731872	0.0013	-0.117125	-0.02044	-0.354174
YBL037W	APL3	apl3	0.01097	0.0882456	-0.01127	-0.284872	-0.02043	-0.354047
YJR011C	YJR011C	yjr011c	-0.06311	-0.982315	0.0057	-0.0584063	-0.02041	-0.353794
YLR370C	ARC18	arc18	-0.04731	-0.753983	0.03924	0.389187	-0.02041	-0.353794
YKL110C	KTI12	kti12	-0.00225	-0.102802	0.07712	0.894698	-0.02038	-0.353415
YDL210W	UGA4	uga4	-0.01557	-0.295295	0.01824	0.108941	-0.02033	-0.352782
YIL009C-A	EST3	est3	-0.01762	-0.32492	0.03473	0.329001	-0.02033	-0.352782
YHL012W	YHL012W	yhl012w	0.03618	0.452566	-0.00935	-0.25925	-0.02028	-0.35215
YLR112W	YLR112W	ylr112w	-0.01034	-0.219714	0.02548	0.205559	-0.02023	-0.351517
YLR392C	ART10	art10	-0.01504	-0.287636	-0.05985	-0.933175	-0.02012	-0.350126
YBL009W	ALK2	alk2	-0.01573	-0.297607	0.02765	0.234518	-0.02012	-0.350126
YAR042W	YAR044W	yar044w	-0.00569	-0.152515	-0.02614	-0.483313	-0.02008	-0.34962
YDR522C	SPS2	sps2	-0.00505	-0.143266	-0.03731	-0.632378	-0.02004	-0.349114
YJL152W	YJL152W	yjl152w	0.03518	0.438114	0.03607	0.346883	-0.02002	-0.348861
YJL043W	YJL043W	yjl043w	-0.02446	-0.423768	-0.08239	-1.23397	-0.01995	-0.347975
YMR119W	YMR119W	ymr119w-a	-0.01391	-0.271305	0.00231	-0.103646	-0.01989	-0.347216
YOL029C	YOL029C	yol029c	0.09842	1.35202	-0.07367	-1.1176	-0.01986	-0.346837
YLR284C	ECI1	eci1	-0.0151	-0.288503	-0.0161	-0.349329	-0.01985	-0.34671
YNL119W	NCS2	ncs2	-0.08972	-1.36687	0.03924	0.389187	-0.01984	-0.346584
YCR085W	YCR085W	ycr085w	-0.03	-0.503829	-0.0087	-0.250575	-0.01983	-0.346457
YIL079C	AIR1	air1	-0.01328	-0.262201	0.00166	-0.11232	-0.01983	-0.346457
YGR113W	DAM1	dam1-9	-0.02387	-0.415242	0.06075	0.676239	-0.01972	-0.345066
YDR055W	PST1	pst1	-0.00885	-0.198181	-0.03411	-0.589673	-0.01969	-0.344686
YIL119C	RPI1	rpi1	-0.00073	-0.0808359	-0.00152	-0.154758	-0.01968	-0.34456
YGR018C	YGR018C	ygr018c	0.03138	0.383199	0.02049	0.138967	-0.01966	-0.344307
YDR330W	UBX5	ubx5	-0.00502	-0.142832	0.01649	0.0855869	-0.0196	-0.343548
YAL058W	CNE1	cne1	-0.00997	-0.214367	-0.00012	-0.136075	-0.01957	-0.343168
YAL017W	PSK1	psk1	0.00706	0.0317405	0.01712	0.0939943	-0.01957	-0.343168
YKL176C	LST4	lst4	-0.022535	-0.395949	0.03273	0.302311	-0.01956	-0.343042
YDR411C	DFM1	dfm1	0.01401	0.132178	-0.01045	-0.273929	-0.01952	-0.342536
YIL052C	RPL34B	rpl34b	-0.01762	-0.32492	-0.01293	-0.307025	-0.0195	-0.342283
YDR508C	GNP1	gnp1	-0.07087	-1.09446	0.06595	0.745634	-0.0194	-0.341018
YDL134C	PPH21	pph21	-0.00959	-0.208875	-0.07429	-1.12588	-0.01932	-0.340006
YLR446W	YLR446W	ylr446w	-0.00428	-0.132138	-0.03257	-0.569122	-0.01929	-0.339626
YJR052W	RAD7	rad7	0.02477	0.287675	-0.0234	-0.446748	-0.01926	-0.339247
YIR029W	DAL2	dal2	-0.01698	-0.315671	-0.02437	-0.459692	-0.01922	-0.338741
YHR185C	PFS1	pfs1	-0.00167	-0.0944202	-0.01286	-0.306091	-0.01922	-0.338741
YLR330W	CHS5	chs5	-0.03745	-0.611492	0.02693	0.224909	-0.01922	-0.338741
YOL122C	SMF1	smf1	-0.04255	-0.685194	0.00868	-0.0186381	-0.01919	-0.338361
YLR102C	APC9	apc9	-0.02093	-0.372754	-0.0498	-0.799057	-0.01913	-0.337602
YMR095C	SNO1	sno1	-0.02069	-0.369286	-0.04424	-0.724859	-0.01912	-0.337476
YGR173W	RBG2	rbg2	-0.16804	-2.4987	-0.128	-1.84264	-0.01909	-0.337096
YML095C	RAD10	rad10	-0.04082	-0.660193	0.02504	0.199687	-0.01909	-0.337096
YAL043C	YAL043C	yal043c-a	-0.00249	-0.10627	-0.0303	-0.538829	-0.01906	-0.336717
YML005W	TRM12	trm12	0.00161	-0.0470196	0.00356	-0.0869648	-0.01906	-0.336717
YCR051W	YCR051W	ycr051w	0.00776	0.0418565	0.00148	-0.114723	-0.01903	-0.336337
YKL053C-A	MDM35	mdm35		-0.0702864	-0.11689	-1.69438	-0.01897	-0.335578
YDR309C	GIC2	gic2	-0.01173	-0.239801	-0.03368	-0.583935	-0.01897	-0.335578
YBR162W-A	YSY6	ysy6	-0.00428	-0.132138	-0.0438	-0.718987	-0.01895	-0.335325
YCR028C-A	RIM1	rim1	-0.0003	-0.0746218	0.04429	0.45658	-0.01894	-0.335199
YBR291C	CTP1	ctp1	-0.00304	-0.114219	-0.02849	-0.514674	-0.01893	-0.335072
YDR288W	NSE3	nse3-ts3	0.02168	0.24302	-0.10889	-1.58762	-0.01892	-0.334946
YCR073W-A	SOL2	sol2	-0.01805	-0.331134	-0.00104	-0.148352	-0.01892	-0.334946
YLR118C	YLR118C	ylr118c	-0.03888	-0.632157	0.032	0.292569	-0.01892	-0.334946
YBR108W	AIM3	aim3	0.00388	-0.0142149	-0.01974	-0.397905	-0.0189	-0.334693
YGL061C	DUO1	duo1-2	-0.01766	-0.325498	-0.14663	-2.09126	-0.01889	-0.334566
YBR105C	VID24	vid24	-0.04271	-0.687506	0.01187	0.0239327	-0.01886	-0.334187
YNL098C	RAS2	ras2	-0.02715	-0.462642	0.00123	-0.118059	-0.01881	-0.333554
YJL051W	IRC8	irc8	-0.03164	-0.527529	-0.02339	-0.446614	-0.0188	-0.333428
YBL107C	MIC23	mic23	0.00174	-0.0451409	-0.00191	-0.159962	-0.01877	-0.333048
YFR007W	YFH7	yfh7	-0.00849	-0.192979	-0.11667	-1.69144	-0.01874	-0.332669
YMR254C	YMR254C	ymr254c	0.04041	0.513695	-0.05517	-0.87072	-0.01867	-0.331783
YDR102C	YDR102C	ydr102c	-0.01298	-0.257866	-0.06389	-0.987089	-0.01866	-0.331657
YOR230W	WTM1	wtm1	0.02769	0.329873	-0.03764	-0.636781	-0.01861	-0.331024
YOR189W	IES4	ies4	0.01942	0.21036	-0.01176	-0.291411	-0.01859	-0.330771
YLR348C	DIC1	dic1	0.02158	0.241575	-0.0173	-0.365343	-0.01858	-0.330645
YOR204W	DED1	ded1-199	0.00778	0.0421456	0.10635	1.28477	-0.01858	-0.330645
YGL198W	YIP4	yip4	-0.03338	-0.552674	0.0085	-0.0210402	-0.01856	-0.330392
YOR104W	PIN2	pin2	0.01671	0.171197	-0.08063	-1.21049	-0.01854	-0.330139
YPR126C	YPR126C	ypr126c	-0.03834	-0.624353	-0.0181	-0.376019	-0.01854	-0.330139
YOR008C	YOR008C	yor008c-a	0.00908	0.0609324	-0.0315	-0.554843	-0.01853	-0.330012
YER182W	FMP10	fmp10	0.01445	0.138536	-0.05145	-0.821077	-0.01846	-0.329127
YJR064W	YJR064W	yjr064w-ph	-0.03486	-0.574062	-0.06141	-0.953994	-0.01841	-0.328494
YGR276C	RNH70	rnh70	0.02078	0.230014	-0.03476	-0.598348	-0.01839	-0.328241
YDR475C	JIP4	jip4	0.01912	0.206025	0.01363	0.04742	-0.01835	-0.327735
YPL035C	YPL035C	ypl035c	0.00918	0.0623775	0.02415	0.18781	-0.01831	-0.327229
YDR134C	YDR134C	ydr134c	-0.02734	-0.465388	-0.09599	-1.41547	-0.01823	-0.326217
YJL065C	DLS1	dls1	0.0039	-0.0139259	0.01138	0.0173936	-0.0182	-0.325838
YAL049C	AIM2	aim2	-0.01296	-0.257577	-0.02374	-0.451285	-0.01817	-0.325458
YJR091C	JSN1	jsn1	-0.09449	-1.4358	-0.02889	-0.520012	-0.01815	-0.325205
YOR019W	YOR019W	yor019w	-0.00441	-0.134017	-0.03247	-0.567787	-0.01813	-0.324952
YBR006W	UGA2	uga2	-0.01258	-0.252085	-0.01941	-0.393501	-0.01813	-0.324952
YGR197C	SNG1	sng1	-0.0244	-0.422901	0.0239	0.184474	-0.01811	-0.324699
YJR053W	BFA1	bfa1	-0.03057	-0.512066	0.03034	0.270416	-0.01806	-0.324067
YMR133W	REC114	rec114	0.00203	-0.04095	0.04851	0.512896	-0.01804	-0.323814
YIL092W	YIL092W	yil092w	-0.02143	-0.37998	-0.01565	-0.343323	-0.01799	-0.323181
YPL245W	YPL245W	ypl245w	0.6849	9.82748	0.03683	0.357026	-0.01799	-0.323181
YDR070C	FMP16	fmp16	-0.00251	-0.106559	0.06453	0.726684	-0.01798	-0.323055
YLR090W	XDJ1	xdj1	-0.02771	-0.470735	0.00258	-0.100043	-0.01794	-0.322549
YFL047W	RGD2	rgd2	-0.01477	-0.283734	-0.05161	-0.823212	-0.01793	-0.322422
YGR249W	MGA1	mga1	-0.06285	-0.978557	0.03112	0.280825	-0.01793	-0.322422
YJR137C	MET5	met5	-0.04045	-0.654846	-0.06341	-0.980684	-0.01792	-0.322296
YKR051W	YKR051W	ykr051w	0.00658	0.0248039	0.00029	-0.130603	-0.01791	-0.322169
YPL144W	POC4	poc4	-0.05865	-0.917861	-0.10849	-1.58228	-0.01789	-0.321916
YMR306W	FKS3	fks3	-0.01924	-0.348331	0.07761	0.901237	-0.01788	-0.32179
YJL007C	YJL007C	yjl007c	-0.05344	-0.84257	-0.0464	-0.753684	-0.01787	-0.321663
YOL048C	RRT8	rrt8	-0.01077	-0.225928	-0.04966	-0.797189	-0.01784	-0.321284
YBL094C	YBL094C	ybl094c	0.02793	0.333341	0.03945	0.39199	-0.01781	-0.320904
YKR064W	OAF3	oaf3	-0.00708	-0.172602	-0.04464	-0.730197	-0.0178	-0.320778
YHR130C	YHR130C	yhr130c	-0.02524	-0.43504	-0.03067	-0.543766	-0.0178	-0.320778
YMR086W	SEG1	seg1	-0.02317	-0.405126	0.01115	0.0143243	-0.01775	-0.320145
YGL251C	HFM1	hfm1	0.00618	0.0190233	0.00677	-0.0441271	-0.01773	-0.319892
YIL139C	REV7	rev7	-0.01431	-0.277086	-0.03849	-0.648125	-0.01769	-0.319386
YJL134W	LCB3	lcb3	-0.00886	-0.198326	0.00917	-0.012099	-0.01767	-0.319133
YGL259W	YPS5	yps5	-0.02885	-0.48721	-0.01582	-0.345592	-0.01765	-0.31888
YER179W	DMC1	dmc1	-0.0025	-0.106415	0.00791	-0.0289138	-0.01765	-0.31888
YMR013C	SEC59	sec59-ts	-0.01961	-0.353679	0.02185	0.157116	-0.01763	-0.318627
YDR395W	SXM1	sxm1	0.01589	0.159346	0.03634	0.350486	-0.01761	-0.318374
YJL089W	SIP4	sip4	-0.01728	-0.320007	-0.05757	-0.902749	-0.01754	-0.317489
YOL049W	GSH2	gsh2	-0.01371	-0.268415	0.05701	0.626329	-0.01745	-0.31635
YIL074C	SER33	ser33	0.03485	0.433345	0.00492	-0.0688155	-0.01743	-0.316097
YLR018C	POM34	pom34	-0.02883	-0.48692	-0.01755	-0.368679	-0.01742	-0.315971
YDR179C	CSN9	csn9	0.00774	0.0415675	0.00874	-0.0178374	-0.0174	-0.315718
YMR094W	CTF13	ctf13-30	-0.10181	-1.54158	-0.02584	-0.47931	-0.01738	-0.315465
YHR113W	APE4	ape4	-0.02008	-0.360471	-0.0611	-0.949857	-0.01735	-0.315085
YOL106W	YOL106W	yol106w	-0.01635	-0.306567	0.02133	0.150177	-0.01734	-0.314959
YLR019W	PSR2	psr2	-0.0471	-0.750948	-0.05037	-0.806664	-0.0173	-0.314453
YGL035C	MIG1	mig1	0.02768	0.329729	-0.00271	-0.170638	-0.0173	-0.314453
YAR014C	BUD14	bud14	-0.02472	-0.427525	0.03866	0.381447	-0.01727	-0.314073
YPR093C	ASR1	asr1	-0.04498	-0.720311	-0.03762	-0.636515	-0.01725	-0.31382
YBR230C	OM14	om14	-0.01188	-0.241969	0.04907	0.520369	-0.01725	-0.31382
YPL149W	ATG5	atg5	-0.01688	-0.314226	-0.0039	-0.186519	-0.01722	-0.313441
YDL211C	YDL211C	ydl211c	0.04506	0.580894	0.03518	0.335006	-0.0172	-0.313188
YOR195W	SLK19	slk19	-0.01779	-0.327377	0.0612	0.682245	-0.0172	-0.313188
YOR116C	RPO31	rpo31-698	0.00264	-0.0321347	0.0224	0.164456	-0.01719	-0.313061
YJL067W	YJL067W	yjl067w	0.03944	0.499677	0.02119	0.148309	-0.01713	-0.312302
YGR275W	RTT102	rtt102	-0.03839	-0.625076	-0.02735	-0.499461	-0.01712	-0.312176
YJL192C	SOP4	sop4	-0.01109	-0.230553	0.00806	-0.026912	-0.01711	-0.312049
YDL077C	VAM6	vam6	-0.05615	-0.881733	0.003205	-0.0917023	-0.017105	-0.311986
YPR012W	YPR012W	ypr012w	-0.02997	-0.503395	0.01314	0.0408809	-0.0171	-0.311923
YPL072W	UBP16	ubp16	0.00617	0.0188788	-0.03844	-0.647457	-0.01708	-0.31167
YOR048C	RAT1	rat1-1	0.02508	0.292155	0.11983	1.46467	-0.01708	-0.31167
YGL202W	ARO8	aro8	-0.03148	-0.525217	-0.01786	-0.372816	-0.01703	-0.311037
YAL055W	PEX22	pex22	-0.02551	-0.438942	0.00164	-0.112587	-0.017	-0.310658
YGL028C	SCW11	scw11	-0.01212	-0.245437	-0.04559	-0.742875	-0.01698	-0.310405
YHR181W	SVP26	svp26	0.00105	-0.0551124	0.03876	0.382781	-0.01694	-0.309899
YOL070C	NBA1	nba1	-0.03172	-0.528685	0.00863	-0.0193053	-0.0169	-0.309393
YJL181W	YJL181W	yjl181w	-0.01935	-0.349921	0.01268	0.0347422	-0.0169	-0.309393
YIL086C	YIL086C	yil086c	-0.0133	-0.26249	-0.04543	-0.740739	-0.01686	-0.308887
YIL005W	EPS1	eps1	-0.00672	-0.1674	-0.01474	-0.331179	-0.01685	-0.30876
YGR108W	CLB1	clb1	0.04874	0.634075	-0.00705	-0.228556	-0.01684	-0.308634
YOL089C	HAL9	hal9	-0.02108	-0.374922	-0.00251	-0.167969	-0.01682	-0.308381
YDL173W	PAR32	par32	0.03036	0.368458	-0.27126	-3.75446	-0.0168	-0.308128
YDR305C	HNT2	hnt2	0.02186	0.245621	-0.02271	-0.43754	-0.01679	-0.308001
YLR227C	ADY4	ady4	-0.01775	-0.326799	-0.00179	-0.158361	-0.01679	-0.308001
YKL005C	BYE1	bye1	0.00913	0.061655	0.01926	0.122553	-0.01677	-0.307748
YCL001W	YCL001W	ycl001w-a	-0.00951	-0.207719	0.03696	0.35876	-0.01677	-0.307748
YLR199C	PBA1	pba1	0.03505	0.436235	0.05122	0.549061	-0.01674	-0.307369
YDL149W	ATG9	atg9	0.00267	-0.0317011	-0.09591	-1.4144	-0.01673	-0.307242
YJR042W	YJR042W	yjr042w-ph	0.04384	0.563263	0.05909	0.654087	-0.01671	-0.306989
YLR395C	COX8	cox8	-0.05386	-0.848639	-0.12742	-1.8349	-0.01669	-0.306736
YDL172C	YDL172C	ydl172c	0.01636	0.166139	-0.13688	-1.96115	-0.01668	-0.30661
YGR087C	PDC6	pdc6	-0.14182	-2.11979	-0.01133	-0.285673	-0.01665	-0.30623
YDR275W	BSC2	bsc2	-0.02652	-0.453538	-0.0087	-0.250575	-0.01662	-0.305851
YLR043C	TRX1	trx1	-0.02943	-0.495591	-0.01879	-0.385227	-0.01657	-0.305218
YGL145W	TIP20	tip20-5	-0.05062	-0.801817	-0.01216	-0.296749	-0.01652	-0.304586
YJL178C	ATG27	atg27	-0.00851	-0.193268	-0.01	-0.267924	-0.01652	-0.304586
YOR061W	CKA2	cka2	-0.00122	-0.0879171	0.10428	1.25715	-0.01652	-0.304586
YLR247C	IRC20	irc20	-0.03796	-0.618862	0.01953	0.126156	-0.01649	-0.304206
YOL152W	FRE7	fre7	-0.06629	-1.02827	0.03031	0.270016	-0.01644	-0.303574
YBR284W	YBR284W	ybr284w	-0.0187	-0.340528	-0.04313	-0.710046	-0.01636	-0.302562
YIR027C	DAL1	dal1	-0.00623	-0.160319	-0.0451	-0.736336	-0.01635	-0.302435
YLR364W	GRX8	grx8	-0.02969	-0.499349	-0.01071	-0.277399	-0.01633	-0.302182
YBR064W	YBR064W	ybr064w	-0.02649	-0.453104	-0.07069	-1.07784	-0.01631	-0.301929
YLR064W	PER33	per33	0.00647	0.0232142	0.02884	0.250398	-0.01619	-0.300411
YJL022W	YJL022W	yjl022w	-0.03082	-0.515679	0.0146	0.0603647	-0.01615	-0.299905
YIL130W	ASG1	asg1	0.0305	0.370482	0.05727	0.629799	-0.01614	-0.299779
YCR001W	YCR001W	ycr001w	-0.01614	-0.303532	-0.01493	-0.333715	-0.01613	-0.299652
YBR194W	AIM4	aim4	-0.0297	-0.499493	0.01989	0.13096	-0.01608	-0.29902
YGL245W	GUS1	gus1-ph	-0.01951	-0.352233	-0.04885	-0.78638	-0.01606	-0.298767
YMR055C	BUB2	bub2	0.00277	-0.030256	-0.01591	-0.346793	-0.01604	-0.298514
YOR255W	OSW1	osw1	-0.0073	-0.175782	0.01113	0.0140574	-0.01599	-0.297881
YLR008C	PAM18	pam18-1	0.01536	0.151687	0.08201	0.959956	-0.01595	-0.297375
YGR058W	PEF1	pef1	0.0128	0.114692	0.04524	0.469257	-0.01592	-0.296996
YML056C	IMD4	imd4	-0.03143	-0.524494	-0.09503	-1.40265	-0.01591	-0.296869
YMR313C	TGL3	tgl3	-0.00884	-0.198037	-0.0649	-1.00057	-0.0159	-0.296743
YER164W	CHD1	chd1	0.01275	0.113969	0.01281	0.0364771	-0.01584	-0.295984
YFR041C	ERJ5	erj5	-0.02718	-0.463076	-0.01258	-0.302354	-0.01583	-0.295857
YNL063W	MTQ1	mtq1	-0.00512	-0.144278	0.05691	0.624994	-0.01581	-0.295604
YBL036C	YBL036C	ybl036c	-0.00262	-0.108149	-0.01698	-0.361072	-0.0158	-0.295478
YCR075C	ERS1	ers1	0.00825	0.0489377	0.06893	0.785402	-0.01577	-0.295098
YDR403W	DIT1	dit1	-0.0159	-0.300064	0.01096	0.0117887	-0.01576	-0.294972
YLR121C	YPS3	yps3	-0.00708	-0.172602	0.00966	-0.00555989	-0.01574	-0.294719
YNL138W	SRV2	srv2-ts	0.01254	0.110934	0.04634	0.483937	-0.01573	-0.294592
YBL005W	PDR3	pdr3	0.0003	-0.065951	0.02498	0.198886	-0.01571	-0.294339
YDR402C	DIT2	dit2	-0.0381	-0.620885	0.02478	0.196217	-0.0157	-0.294213
YDL119C	YDL119C	ydl119c	-0.03864	-0.628689	-0.03696	-0.627707	-0.01568	-0.29396
YAR050W	FLO1	flo1	-0.0314	-0.524061	0.01982	0.130026	-0.01559	-0.292821
YDL183C	YDL183C	ydl183c	-0.03518	-0.578687	0.08192	0.958754	-0.01558	-0.292695
YLL047W	YLL047W	yll047w	-0.00965	-0.209742	-0.0809	-1.21409	-0.01557	-0.292568
YGL209W	MIG2	mig2	-0.01523	-0.290381	-0.0289	-0.520146	-0.01556	-0.292442
YDL125C	HNT1	hnt1	-0.01342	-0.264224	-0.02775	-0.504799	-0.01555	-0.292315
YML101C	CUE4	cue4	-0.00553	-0.150203	-0.01117	-0.283538	-0.01554	-0.292189
YLR266C	PDR8	pdr8	-0.0321	-0.534177	0.01056	0.00645066	-0.01552	-0.291936
YIR016W	YIR016W	yir016w	0.02633	0.310219	0.0333	0.309917	-0.0155	-0.291683
YKL067W	YNK1	ynk1	0.00278	-0.0301115	0.05222	0.562406	-0.01545	-0.29105
YFR008W	FAR7	far7	-0.02588	-0.444289	0.02502	0.19942	-0.01543	-0.290797
YML057W	CMP2	cmp2	-0.01549	-0.294139	-0.01435	-0.325975	-0.01541	-0.290544
YKL070W	YKL070W	ykl070w	0.02182	0.245043	0.04584	0.477265	-0.0154	-0.290418
YJR008W	MHO1	mho1	-0.01062	-0.22376	-0.02512	-0.469701	-0.01539	-0.290291
YOL126C	MDH2	mdh2	0.00881	0.0570305	0.05268	0.568545	-0.01538	-0.290165
YLL059C	YLL059C	yll059c	-0.00795	-0.185175	0.03664	0.35449	-0.01537	-0.290038
YCR015C	YCR015C	ycr015c	-0.00639	-0.162631	-0.01355	-0.315299	-0.01536	-0.289912
YKR028W	SAP190	sap190	-0.03035	-0.508887	-0.06591	-1.01405	-0.01534	-0.289659
YKL217W	JEN1	jen1	-0.00324	-0.117109	0.00222	-0.104847	-0.01534	-0.289659
YOR049C	RSB1	rsb1	-0.03931	-0.638371	0.01303	0.039413	-0.01534	-0.289659
YDL171C	GLT1	glt1	-0.01253	-0.251363	-0.00677	-0.224819	-0.01533	-0.289532
YJR090C	GRR1	grr1	-0.04082	-0.660193	0.02386	0.18394	-0.01531	-0.289279
YLR108C	YLR108C	ylr108c	-0.01346	-0.264802	-0.07327	-1.11227	-0.01527	-0.288773
YNL116W	DMA2	dma2	-0.04389	-0.704559	-0.04769	-0.770899	-0.01526	-0.288647
YHR105W	YPT35	ypt35	0.00552	0.00948538	-0.02987	-0.53309	-0.01519	-0.287761
YPL081W	RPS9A	rps9a	-0.01851	-0.337782	0.02371	0.181938	-0.01517	-0.287508
YDR051C	DET1	det1	-0.00299	-0.113496	-0.03177	-0.558446	-0.01516	-0.287382
YOR105W	YOR105W	yor105w	0.01578	0.157757	-0.04993	-0.800792	-0.01515	-0.287255
YOL153C	YOL153C	yol153c	-0.06583	-1.02162	-0.01772	-0.370948	-0.01514	-0.287129
YJR096W	YJR096W	yjr096w	-0.02768	-0.470301	0.03854	0.379846	-0.01513	-0.287002
YPL225W	YPL225W	ypl225w	0.40335	5.75869	0.04797	0.50569	-0.01513	-0.287002
YPR103W	PRE2	pre2-2	0.03101	0.377852	0.09077	1.07686	-0.01511	-0.286749
YDR179W	YDR179W	ydr179w-a	0.0234	0.267877	0.01665	0.0877221	-0.01509	-0.286496
YGR016W	YGR016W	ygr016w	-0.00965	-0.209742	0.00285	-0.0964398	-0.01506	-0.286117
YGL006W	PMC1	pmc1	-0.0221	-0.389663	-0.01748	-0.367745	-0.01503	-0.285737
YBR066C	NRG2	nrg2	0.00022	-0.0671071	0.00606	-0.0536021	-0.01501	-0.285484
YMR304C	YMR304C	ymr304c-a	0.02139	0.238829	-0.02347	-0.447682	-0.01496	-0.284852
YJR094C	IME1	ime1	-0.01824	-0.33388	-0.00624	-0.217746	-0.01496	-0.284852
YOR344C	TYE7	tye7	0.04403	0.566009	-0.09531	-1.40639	-0.0149	-0.284093
YFL023W	BUD27	bud27	-0.06577	-1.02076	0.07845	0.912447	-0.01489	-0.283966
YOL108C	INO4	ino4	0.03481	0.432767	0.03633	0.350353	-0.01488	-0.28384
YOL093W	TRM10	trm10	0.00397	-0.0129143	0.05023	0.535849	-0.01486	-0.283587
YDR004W	RAD57	rad57	-0.02182	-0.385616	-0.084295	-1.2594	-0.014855	-0.283524
YFL039C	ACT1	act1-121	0.00586	0.0143989	-0.12527	-1.80621	-0.01477	-0.282448
YBR281C	DUG2	dug2	-0.0333	-0.551518	0.01458	0.0600978	-0.01477	-0.282448
YLL060C	GTT2	gtt2	-0.02063	-0.368419	-0.02036	-0.406179	-0.01471	-0.281689
YBL088C	TEL1	tel1	0.00826	0.0490822	-0.00242	-0.166768	-0.01469	-0.281436
YDR498C	SEC20	sec20-1	0.0648	0.866165	0.05044	0.538652	-0.01468	-0.28131
YPL161C	BEM4	bem4	-0.02461	-0.425936	0.08451	0.993318	-0.01468	-0.28131
YLR149C	YLR149C	ylr149c	-0.00703	-0.17188	0.0472	0.495414	-0.01461	-0.280424
YPR160W	GPH1	gph1	-0.00406	-0.128959	-0.08404	-1.25599	-0.0146	-0.280298
YNL078W	NIS1	nis1	-0.03996	-0.647765	-0.01458	-0.329044	-0.01459	-0.280171
YBR208C	DUR1	dur1	0.00316	-0.0246199	-0.01989	-0.399907	-0.01458	-0.280045
YMR187C	YMR187C	ymr187c	-0.06831	-1.05746	-0.02071	-0.410849	-0.01456	-0.279792
YKL196C	YKT6	ykt6-ph	0.03696	0.463838	-0.00586	-0.212675	-0.01453	-0.279412
YLR380W	CSR1	csr1	-0.02464	-0.426369	-0.0228	-0.438741	-0.01448	-0.27878
YIL102C	YIL102C	yil102c	0.01463	0.141138	-0.00139	-0.153023	-0.01448	-0.27878
YKR014C	YPT52	ypt52	-0.03266	-0.542269	-0.04106	-0.682422	-0.01446	-0.278527
YJR120W	YJR120W	yjr120w	0.04824	0.62685	-0.05066	-0.810534	-0.01443	-0.278147
YBR258C	SHG1	shg1	0.01038	0.0797192	-0.0418	-0.692297	-0.0144	-0.277768
YOR225W	YOR225W	yor225w	-0.01405	-0.273329	-0.02804	-0.508669	-0.0144	-0.277768
YCR061W	YCR061W	ycr061w	0.01779	0.186804	0.05746	0.632334	-0.01437	-0.277388
YML117W	YML117W	yml117w-a	-0.00191	-0.0978886	-0.01924	-0.391232	-0.01436	-0.277262
YDL174C	DLD1	dld1	-0.04873	-0.774504	0.01123	0.0153919	-0.01433	-0.276882
YLR054C	OSW2	osw2	-0.00724	-0.174915	-0.01064	-0.276465	-0.01432	-0.276756
YFR004W	RPN11	rpn11-14	0.00986	0.0722045	0.0389	0.38465	-0.01429	-0.276376
YDR288W	NSE3	nse3-ts4	0.06266	0.835239	0.00067	-0.125532	-0.01425	-0.27587
YDR145W	TAF12	taf12-w486stop	-0.03817	-0.621897	-0.04334	-0.712848	-0.01421	-0.275364
YOR360C	PDE2	pde2	0.04779	0.620346	0.02242	0.164723	-0.01421	-0.275364
YFR017C	IGD1	igd1	0.06606	0.884374	0.00098	-0.121395	-0.01414	-0.274479
YMR195W	ICY1	icy1	-0.02362	-0.411629	0.00442	-0.075488	-0.01413	-0.274352
YBL011W	SCT1	sct1	0.01151	0.0960493	-0.04229	-0.698836	-0.01411	-0.274099
YHR116W	COX23	cox23	-0.00639	-0.162631	0.07717	0.895365	-0.01411	-0.274099
YOL017W	ESC8	esc8	-0.01436	-0.277809	0.0358	0.34328	-0.01408	-0.27372
YOR067C	ALG8	alg8	0.01534	0.151398	0.11052	1.34042	-0.01407	-0.273593
YFL041W	FET5	fet5	0.00143	-0.0496209	0.00223	-0.104714	-0.01406	-0.273467
YIL087C	AIM19	aim19	0.00674	0.0271161	-0.01783	-0.372416	-0.01401	-0.272834
YKL211C	TRP3	trp3	0.00188	-0.0431177	-0.03733	-0.632644	-0.014	-0.272708
YJL164C	TPK1	tpk1	0.02638	0.310942	-0.01924	-0.391232	-0.01399	-0.272581
YNR038W	DBP6	dbp6-ph	0.05332	0.700263	-0.01537	-0.339587	-0.01399	-0.272581
YGR247W	CPD1	cpd1	0.0095	0.067002	-0.0134	-0.313297	-0.01396	-0.272202
YJL105W	SET4	set4	0.01336	0.122784	-0.00732	-0.232159	-0.01394	-0.271949
YLR341W	SPO77	spo77	0.00786	0.0433017	0.02001	0.132562	-0.01394	-0.271949
YML076C	WAR1	war1	-0.01514	-0.289081	-0.01887	-0.386295	-0.0139	-0.271443
YMR238W	DFG5	dfg5	0.02279	0.259061	0.02994	0.265078	-0.01387	-0.271063
YKR081C	RPF2	rpf2-ph	-0.02618	-0.448624	0.01369	0.0482207	-0.01385	-0.27081
YLR214W	FRE1	fre1	-0.01017	-0.217257	-0.03611	-0.616363	-0.01383	-0.270557
YJR058C	APS2	aps2	-0.00591	-0.155694	0.02628	0.216235	-0.01383	-0.270557
YPL267W	ACM1	acm1	0.0091	0.0612214	-0.0138	-0.318635	-0.01381	-0.270304
YLR298C	YHC1	yhc1-3	0.01211	0.10472	-0.02018	-0.403777	-0.01374	-0.269419
YHL046C	PAU13	pau13	-0.0032	-0.116531	-0.02701	-0.494923	-0.01373	-0.269292
YGR014W	MSB2	msb2	-0.02061	-0.36813	-0.00044	-0.140345	-0.0137	-0.268913
YDR011W	SNQ2	snq2	-0.05306	-0.837078	-0.07744	-1.16791	-0.01364	-0.268154
YDL011C	YDL011C	ydl011c	0.01121	0.0917139	0.0274	0.231182	-0.01361	-0.267774
YLR005W	SSL1	ssl1-t242i	0.00448	-0.00554409	0.09201	1.09341	-0.01358	-0.267395
YOR113W	AZF1	azf1	-0.02956	-0.49747	0.00683	-0.0433264	-0.01356	-0.267142
YDR469W	SDC1	sdc1	-0.00603	-0.157428	-0.02163	-0.423127	-0.0135	-0.266383
YCL006C	YCL006C	ycl006c	-0.01528	-0.291104	-0.04038	-0.673347	-0.01348	-0.26613
YOR086C	TCB1	tcb1	0.02291	0.260795	-0.02009	-0.402576	-0.01348	-0.26613
YIL041W	GVP36	gvp36	-0.01385	-0.270438	-0.04446	-0.727795	-0.01346	-0.265877
YNR024W	MPP6	mpp6	-0.02307	-0.40368	0.0209	0.144439	-0.01338	-0.264865
YGR266W	YGR266W	ygr266w	-0.01741	-0.321885	0.00476	-0.0709507	-0.01336	-0.264612
YLR311C	YLR311C	ylr311c	-0.02818	-0.477527	-0.07286	-1.10679	-0.01334	-0.264359
YDR043C	NRG1	nrg1	0.05535	0.729599	0.064	0.719611	-0.01333	-0.264233
YML072C	TCB3	tcb3	0.03416	0.423374	-0.00685	-0.225887	-0.0133	-0.263853
YCR016W	YCR016W	ycr016w	-0.01943	-0.351077	-0.03416	-0.590341	-0.01329	-0.263727
YBR090C	YBR090C	ybr090c	-0.0247	-0.427236	0.05481	0.59697	-0.01329	-0.263727
YIL118W	RHO3	rho3-ser228	-0.02827	-0.478828	0.01203	0.0260679	-0.01325	-0.263221
YLR287C	YLR287C	ylr287c	-0.0153	-0.291393	0.04154	0.419881	-0.01325	-0.263221
YKL132C	RMA1	rma1	-0.02239	-0.393853	-0.02795	-0.507468	-0.01324	-0.263094
YHR111W	UBA4	uba4	-0.014475	-0.279471	0.018485	0.11221	-0.01322	-0.262841
YOL109W	ZEO1	zeo1	-0.02479	-0.428537	0.02263	0.167526	-0.01322	-0.262841
YLR095C	IOC2	ioc2	-0.01055	-0.222749	-0.03706	-0.629041	-0.01321	-0.262715
YBR288C	APM3	apm3	-0.01913	-0.346742	-0.00114	-0.149687	-0.0132	-0.262588
YOR242C	SSP2	ssp2	0.00557	0.0102079	0.04413	0.454444	-0.01316	-0.262082
YGL262W	YGL262W	ygl262w	0.02145	0.239696	-0.00073	-0.144215	-0.01311	-0.26145
YDL169C	UGX2	ugx2	-0.06047	-0.944163	-0.008	-0.241234	-0.01303	-0.260438
YKL039W	PTM1	ptm1	0.00402	-0.0121917	-0.02231	-0.432202	-0.01302	-0.260311
YGL208W	SIP2	sip2	-0.03894	-0.633024	-0.06817	-1.04421	-0.013	-0.260058
YMR295C	YMR295C	ymr295c	0.01182	0.100529	-0.03513	-0.603285	-0.01299	-0.259932
YJR082C	EAF6	eaf6	-0.0214	-0.379547	0.05516	0.601641	-0.01298	-0.259805
YOL136C	PFK27	pfk27	-0.02114	-0.375789	-0.05237	-0.833354	-0.01293	-0.259173
YOR121C	YOR121C	yor121c	0.024	0.276547	-0.03699	-0.628107	-0.01293	-0.259173
YBR239C	ERT1	ert1	-0.01231	-0.248183	0.04184	0.423884	-0.01287	-0.258414
YLR435W	TSR2	tsr2	-0.00164	-0.0939867	0.04196	0.425486	-0.01285	-0.258161
YDR258C	HSP78	hsp78	-0.05853	-0.916127	-0.00742	-0.233494	-0.01283	-0.257908
YKL174C	TPO5	tpo5	0.00425	-0.00886791	0.00937	-0.00942996	-0.01283	-0.257908
YBR139W	YBR139W	ybr139w	-0.01346	-0.264802	0.00156	-0.113655	-0.01279	-0.257402
YLR122C	YLR122C	ylr122c	-0.01111	-0.230842	-0.04899	-0.788248	-0.01277	-0.257149
YLR039C	RIC1	ric1	0.03517	0.43797	0.08334	0.977704	-0.01275	-0.256896
YLL055W	YCT1	yct1	-0.02891	-0.488077	-0.05303	-0.842162	-0.01274	-0.256769
YIR024C	YIR024C	yir024c	0.01622	0.164115	0.01207	0.0266017	-0.01274	-0.256769
YIL046W	MET30	met30-9	0.02738	0.325393	0.0779	0.905107	-0.01272	-0.256516
YNL056W	OCA2	oca2	-0.0134	-0.263935	0.03204	0.293103	-0.01271	-0.25639
YBR293W	VBA2	vba2	0.00026	-0.066529	0.07952	0.926726	-0.01269	-0.256137
YJL073W	JEM1	jem1	-0.04486	-0.718577	0.10599	1.27997	-0.01267	-0.255884
YGL034C	YGL034C	ygl034c	0.01021	0.0772625	0.05375	0.582824	-0.01265	-0.255631
YKR061W	KTR2	ktr2	0.00032	-0.0656619	-0.03991	-0.667075	-0.01264	-0.255504
YBR074W	YBR074W	ybr074w	0.01294	0.116715	-0.02907	-0.522414	-0.01264	-0.255504
YBR182C	SMP1	smp1	0.00935	0.0648343	-0.00652	-0.221483	-0.01262	-0.255251
YNR032W	PPG1	ppg1	0.00131	-0.051355	0.06969	0.795544	-0.01261	-0.255125
YIL068C	SEC6	sec6-4	0.09892	1.35925	0.15874	1.98392	-0.0126	-0.254998
YGL260W	YGL260W	ygl260w	-0.01197	-0.24327	0.00405	-0.0804257	-0.01251	-0.25386
YBR084W	MIS1	mis1	0.00678	0.0276942	-0.066	-1.01525	-0.0125	-0.253733
YOR064C	YNG1	yng1	-0.03546	-0.582733	-0.04868	-0.784111	-0.01249	-0.253607
YGR054W	YGR054W	ygr054w	0.01503	0.146918	0.05596	0.612317	-0.01249	-0.253607
YLR398C	SKI2	ski2	-0.02831	-0.479406	0.03	0.265879	-0.01245	-0.253101
YLR114C	AVL9	avl9	-0.02211	-0.389807	-0.01448	-0.32771	-0.01243	-0.252848
YAL040C	CLN3	cln3	-0.04115	-0.664962	-0.00305	-0.175176	-0.01242	-0.252721
YBR083W	TEC1	tec1	0.00936	0.0649788	-0.04709	-0.762892	-0.01231	-0.25133
YGL121C	GPG1	gpg1	-0.03059	-0.512355	0.01699	0.0922594	-0.01231	-0.25133
YOR171C	LCB4	lcb4	-0.02413	-0.418999	-0.00265	-0.169838	-0.01229	-0.251077
YLR186W	EMG1	emg1-1	-0.00419	-0.130838	0.02919	0.255069	-0.012285	-0.251013
YBL102W	SFT2	sft2	-0.023	-0.402669	-0.05052	-0.808666	-0.01228	-0.25095
YCR030C	SYP1	syp1	0.02133	0.237962	-0.02163	-0.423127	-0.01227	-0.250824
YDR291W	HRQ1	hrq1	-0.0172	-0.318851	-0.01586	-0.346126	-0.01226	-0.250697
YML058C	YML058C	yml058c-a	-3e-05	-0.0707199	0.00837	-0.022775	-0.01222	-0.250191
YGL165C	YGL165C	ygl165c	-0.00286	-0.111617	0.00873	-0.0179708	-0.01222	-0.250191
YDR540C	IRC4	irc4	-0.02085	-0.371598	-0.05118	-0.817474	-0.01221	-0.250065
YOR085W	OST3	ost3	0.01203	0.103564	0.11306	1.37432	-0.012185	-0.249748
YPR058W	YMC1	ymc1	0.00631	0.020902	-0.00801	-0.241367	-0.01218	-0.249685
YLL049W	LDB18	ldb18	0.00906	0.0606434	0.06666	0.755109	-0.01218	-0.249685
YLR366W	YLR366W	ylr366w	-0.02428	-0.421167	-0.02057	-0.408981	-0.01217	-0.249559
YGR137W	YGR137W	ygr137w	-0.02234	-0.393131	-0.01477	-0.33158	-0.01215	-0.249306
YDR052C	DBF4	dbf4-3	-0.02111	-0.375356	0.0503	0.536784	-0.01215	-0.249306
YDR076W	RAD55	rad55	-0.03236	-0.537934	0.03961	0.394125	-0.01214	-0.249179
YPL021W	ECM23	ecm23	-0.03527	-0.579988	-0.04867	-0.783977	-0.01212	-0.248926
YLR258W	GSY2	gsy2	0.00475	-0.00164221	0.01469	0.0615658	-0.01208	-0.24842
YOR025W	HST3	hst3	-0.01303	-0.258588	0.02269	0.168326	-0.01205	-0.248041
YBR151W	APD1	apd1	-0.01524	-0.290526	0.06799	0.772858	-0.01204	-0.247914
YPL138C	SPP1	spp1	0.04967	0.647515	0.0245	0.192481	-0.01197	-0.247029
YBR297W	MAL33	mal33	0.00035	-0.0652284	-0.02694	-0.493989	-0.01196	-0.246902
YPL253C	VIK1	vik1	-0.0222	-0.391108	-0.02857	-0.515742	-0.01191	-0.24627
YJL158C	CIS3	cis3	0.03207	0.39317	0.00445	-0.0750877	-0.01189	-0.246017
YGR243W	FMP43	fmp43	-0.00659	-0.165521	0.04073	0.409071	-0.01188	-0.24589
YDL144C	YDL144C	ydl144c	-0.01322	-0.261334	0.03104	0.279758	-0.01184	-0.245384
YLR316C	TAD3	tad3-ph	0.06198	0.825412	0.04889	0.517967	-0.01183	-0.245258
YGR187C	HGH1	hgh1	-0.01061	-0.223616	0.0581	0.640875	-0.01182	-0.245131
YOL019W	YOL019W	yol019w	0.00995	0.0735051	0.05778	0.636605	-0.01179	-0.244752
YBR214W	SDS24	sds24	-0.01607	-0.302521	-0.00915	-0.256581	-0.01176	-0.244372
YCL034W	LSB5	lsb5	-0.0305	-0.511054	-0.04659	-0.75622	-0.01173	-0.243993
YLR065C	ENV10	env10	-0.01611	-0.303099	0.02028	0.136165	-0.01173	-0.243993
YBR056W	YBR056W	ybr056w	0.01452	0.139548	-0.00109	-0.149019	-0.01169	-0.243487
YBR169C	SSE2	sse2	-0.02227	-0.392119	-0.0085	-0.247906	-0.01161	-0.242475
YJL161W	FMP33	fmp33	-0.02865	-0.484319	0.04064	0.40787	-0.01159	-0.242222
YOR209C	NPT1	npt1	-0.03502	-0.576375	-0.03531	-0.605687	-0.01158	-0.242095
YDL078C	MDH3	mdh3	-0.01469	-0.282578	0.11082	1.34443	-0.01158	-0.242095
YFL053W	DAK2	dak2	-0.02575	-0.44241	0.00806	-0.026912	-0.01156	-0.241842
YDR124W	YDR124W	ydr124w	-0.05755	-0.901965	-0.022	-0.428065	-0.01155	-0.241716
YBR047W	FMP23	fmp23	-0.00901	-0.200494	-0.02939	-0.526685	-0.01152	-0.241336
YHR106W	TRR2	trr2	-0.0182	-0.333302	0.08679	1.02374	-0.01146	-0.240577
YMR317W	YMR317W	ymr317w	0.01538	0.151976	-0.00281	-0.171973	-0.01145	-0.240451
YIL158W	AIM20	aim20	-0.03468	-0.571461	-0.01765	-0.370014	-0.01142	-0.240071
YJL044C	GYP6	gyp6	-0.03029	-0.50802	-0.10839	-1.58094	-0.01138	-0.239565
YOR337W	TEA1	tea1	-0.02201	-0.388362	0.04152	0.419614	-0.01137	-0.239439
YBR271W	EFM2	efm2	0.01066	0.0837656	-0.06267	-0.970808	-0.01135	-0.239186
YAR040C	YAR040C	yar040c	-0.00954	-0.208153	-0.00191	-0.159962	-0.01131	-0.23868
YDR066C	RTR2	rtr2	-0.04305	-0.69242	0.02601	0.212632	-0.01131	-0.23868
YHR079C	YHR079C	yhr079c-b	-0.04083	-0.660337	-0.06826	-1.04541	-0.0113	-0.238553
YGL117W	YGL117W	ygl117w	0.00379	-0.0155156	0.01384	0.0502225	-0.01126	-0.238047
YDR092W	UBC13	ubc13	-0.01549	-0.294139	-0.0659	-1.01391	-0.01125	-0.237921
YMR209C	YMR209C	ymr209c	-0.00643	-0.163209	-0.02838	-0.513206	-0.01124	-0.237794
YDL099W	BUG1	bug1	-0.03609	-0.591838	-0.00523	-0.204268	-0.01124	-0.237794
YPL113C	YPL113C	ypl113c	-0.00571	-0.152804	-0.01104	-0.281803	-0.01123	-0.237668
YLR151C	PCD1	pcd1	-0.02953	-0.497036	-0.0072	-0.230558	-0.01122	-0.237541
YIL043C	CBR1	cbr1	-0.02097	-0.373332	0.02342	0.178068	-0.0112	-0.237288
YGL166W	CUP2	cup2	-0.0035	-0.120866	0.00884	-0.0165028	-0.01118	-0.237035
YJL020C	BBC1	bbc1	-0.02508	-0.432728	0.00634	-0.0498655	-0.01112	-0.236276
YNL102W	POL1	pol1-13	-0.12254	-1.84116	0.04261	0.43416	-0.01112	-0.236276
YJR001W	AVT1	avt1	0.02702	0.320191	-0.0126	-0.302621	-0.01109	-0.235897
YMR206W	YMR206W	ymr206w	0.00408	-0.0113246	0.02548	0.205559	-0.01107	-0.235644
YGR149W	YGR149W	ygr149w	0.02258	0.256026	0.02908	0.253601	-0.01105	-0.235391
YIR007W	YIR007W	yir007w	-0.0131	-0.2596	-0.03256	-0.568989	-0.01104	-0.235264
YPR125W	YLH47	ylh47	0.03367	0.416293	0.0104	0.00431545	-0.01104	-0.235264
YMR054W	STV1	stv1	-0.00627	-0.160897	-0.0375	-0.634913	-0.01096	-0.234252
YBR028C	YPK3	ypk3	0.00127	-0.0519331	0.02712	0.227445	-0.01095	-0.234126
YHR040W	BCD1	bcd1-ph	0.03231	0.396639	-0.07198	-1.09505	-0.01093	-0.233873
YMR320W	YMR320W	ymr320w	-0.033	-0.547183	-0.03895	-0.654263	-0.01088	-0.23324
YHR092C	HXT4	hxt4	0.0088	0.056886	-0.02623	-0.484514	-0.01086	-0.232987
YPR117W	YPR117W	ypr117w	-0.02159	-0.382292	-0.04165	-0.690295	-0.01083	-0.232608
YHR030C	SLT2	slt2	0.00324222	-0.0234317	-0.0356189	-0.60981	-0.0108	-0.232228
YFR006W	YFR006W	yfr006w	0.00048	-0.0633497	-0.04482	-0.732599	-0.01079	-0.232102
YIL089W	YIL089W	yil089w	-0.00934	-0.205263	-0.00704	-0.228422	-0.01079	-0.232102
YFL015C	YFL015C	yfl015c	-0.05683	-0.89156	-0.04037	-0.673213	-0.01078	-0.231975
YFL042C	YFL042C	yfl042c	0.01441	0.137958	-0.0378	-0.638917	-0.01078	-0.231975
YOR129C	AFI1	afi1	-0.0073	-0.175782	-0.04083	-0.679352	-0.01077	-0.231849
YMR092C	AIP1	aip1	-0.01004	-0.215379	-0.01841	-0.380156	-0.01077	-0.231849
YER180C	ISC10	isc10	-0.02236	-0.39342	-0.03209	-0.562716	-0.01075	-0.231596
YJL099W	CHS6	chs6	-0.00083	-0.0822811	0.0434	0.444703	-0.01075	-0.231596
YDR261C	EXG2	exg2	-0.0029	-0.112195	0.03939	0.391189	-0.01074	-0.231469
YER181C	YER181C	yer181c	-0.016	-0.301509	-0.00419	-0.190389	-0.01069	-0.230837
YFL056C	AAD6	aad6	-0.02065	-0.368708	0.00729	-0.0371877	-0.01065	-0.230331
YIL114C	POR2	por2	-0.02408	-0.418276	-0.01452	-0.328244	-0.01061	-0.229825
YAL037W	YAL037W	yal037w	-0.02933	-0.494146	0.07202	0.826638	-0.01058	-0.229445
YDR384C	ATO3	ato3	-0.01633	-0.306278	-0.02482	-0.465698	-0.01057	-0.229319
YMR285C	NGL2	ngl2	-0.01907	-0.345875	-0.01524	-0.337852	-0.01052	-0.228686
YNR039C	ZRG17	zrg17	-0.01756	-0.324053	0.04401	0.452843	-0.01052	-0.228686
YOR154W	SLP1	slp1	0.02705	0.320624	-0.01391	-0.320103	-0.01051	-0.22856
YJR037W	YJR037W	yjr037w	0.00013	-0.0684077	-0.05393	-0.854173	-0.01041	-0.227295
YLR209C	PNP1	pnp1	0.01743	0.181602	-0.02526	-0.47157	-0.0104	-0.227168
YML071C	COG8	cog8	0.00438	-0.00698923	0.07289	0.838249	-0.0104	-0.227168
YBR235W	VHC1	vhc1	0.01672	0.171341	-0.01466	-0.330112	-0.01036	-0.226662
YPR078C	YPR078C	ypr078c	-0.02565	-0.440965	0.02078	0.142837	-0.01035	-0.226536
YMR316C	YMR316C	ymr316c-a	-0.00863	-0.195002	0.0447	0.462051	-0.01031	-0.22603
YKR026C	GCN3	gcn3	-0.01279	-0.25512	-0.00283	-0.17224	-0.0103	-0.225903
YFR026C	ULI1	uli1	0.02858	0.342735	0.00621	-0.0516004	-0.01029	-0.225777
YFR047C	BNA6	bna6	-0.00572	-0.152948	-0.01468	-0.330379	-0.01026	-0.225397
YOL020W	TAT2	tat2	0.00066	-0.0607485	0.00327	-0.0908349	-0.01026	-0.225397
YGL037C	PNC1	pnc1	-0.00695	-0.170724	-0.03863	-0.649993	-0.01025	-0.225271
YBR073W	RDH54	rdh54	-0.01308	-0.259311	-0.06369	-0.98442	-0.01023	-0.225018
YHL006C	SHU1	shu1	-0.01862	-0.339372	-0.04688	-0.76009	-0.01023	-0.225018
YGL156W	AMS1	ams1	0.02214	0.249668	-0.01923	-0.391099	-0.01022	-0.224891
YPL048W	CAM1	cam1	0.03812	0.480601	-0.08577	-1.27908	-0.0102	-0.224638
YKR047W	YKR047W	ykr047w	-0.00088	-0.0830036	-0.07368	-1.11774	-0.0102	-0.224638
YIL156W	UBP7	ubp7	-0.01177	-0.240379	0.02272	0.168727	-0.0102	-0.224638
YGL032C	AGA2	aga2	-0.01167	-0.238934	0.0074	-0.0357197	-0.01019	-0.224512
YGR103W	NOP7	nop7-1	0.03069	0.373227	-0.0008	-0.145149	-0.01015	-0.224006
YHL021C	AIM17	aim17	0.00965	0.0691697	-0.04764	-0.770232	-0.01014	-0.223879
YGL164C	YRB30	yrb30	-0.00825	-0.189511	0.01049	0.00551651	-0.01011	-0.2235
YHR125W	YHR125W	yhr125w	0.01608	0.162092	-0.0074	-0.233227	-0.0101	-0.223373
YBR053C	YBR053C	ybr053c	-0.00673	-0.167544	0.03118	0.281626	-0.0101	-0.223373
YAR042W	SWH1	swh1	-0.01339	-0.263791	-0.01169	-0.290477	-0.01007	-0.222994
YKR091W	SRL3	srl3	0.01268	0.112957	-0.04122	-0.684557	-0.01004	-0.222614
YDR430C	CYM1	cym1	0.00288	-0.0286663	0.00578	-0.0573387	-0.01003	-0.222488
YDR441C	APT2	apt2	-0.01278	-0.254975	-0.06165	-0.957196	-0.00998	-0.221855
YOR139C	YOR139C	yor139c	0.00888	0.0580421	-0.06193	-0.960933	-0.00996	-0.221602
YJR046W	TAH11	tah11-ts	-0.02712	-0.462209	-0.12065	-1.74456	-0.00994	-0.221349
YIL058W	YIL058W	yil058w	-0.02578	-0.442844	-0.07425	-1.12534	-0.00994	-0.221349
YLL029W	FRA1	fra1	-0.04968	-0.788232	0.00071	-0.124998	-0.00994	-0.221349
YIL152W	YIL152W	yil152w	0.00337	-0.0215851	-0.05754	-0.902348	-0.00992	-0.221096
YDR059C	UBC5	ubc5	-0.0144	-0.278387	0.05065	0.541454	-0.00991	-0.22097
YLR058C	SHM2	shm2	0.00418	-0.00987951	0.00545	-0.0617426	-0.00987	-0.220464
YFL009W	CDC4	cdc4-1	-0.00259	-0.107716	0.06955	0.793676	-0.00986	-0.220337
YDR297W	SUR2	sur2	-0.00033	-0.0750554	0.01911	0.120551	-0.00981	-0.219705
YAR043C	YAR043C	yar043c	-0.00356	-0.121733	0.01464	0.0608985	-0.0098	-0.219578
YLR045C	STU2	stu2-11	0.02283	0.259639	0.03059	0.273752	-0.00978	-0.219325
YGL177W	YGL177W	ygl177w	0.01098	0.0883901	0.0748	0.863738	-0.00975	-0.218946
YDL096C	YDL096C	ydl096c	-0.01465	-0.282	-0.02504	-0.468634	-0.00974	-0.218819
YKR093W	PTR2	ptr2	-0.02453	-0.424779	-0.05467	-0.864048	-0.00971	-0.21844
YJR139C	HOM6	hom6	-0.05379	-0.847628	0.05029	0.53665	-0.00971	-0.21844
YDL178W	DLD2	dld2	-0.00423	-0.131416	0.002	-0.107783	-0.00965	-0.217681
YKL086W	SRX1	srx1	-0.00107	-0.0857494	0.00298	-0.0947049	-0.00961	-0.217175
YMR226C	YMR226C	ymr226c	-0.01322	-0.261334	-0.01315	-0.309961	-0.00957	-0.216669
YMR251W-A	HOR7	hor7	-0.04885	-0.776238	-0.31851	-4.38501	-0.00956	-0.216542
YNL090W	RHO2	rho2	-0.01795	-0.329689	0.01833	0.110142	-0.00956	-0.216542
YDR007W	TRP1	trp1	0.01444	0.138392	-0.02223	-0.431134	-0.00951	-0.21591
YGL067W	NPY1	npy1	-0.01585	-0.299341	0.01074	0.00885278	-0.00951	-0.21591
YGL060W	YBP2	ybp2	-0.03468	-0.571461	0.00225	-0.104447	-0.00949	-0.215657
YDR276C	PMP3	pmp3	-0.0885	-1.34924	-0.078295	-1.17933	-0.00944	-0.215024
YLR187W	SKG3	skg3	0.00715	0.0330412	-0.02616	-0.48358	-0.00943	-0.214898
YJL020C	YJL021C	yjl021c	-0.01824	-0.33388	-0.01443	-0.327042	-0.00942	-0.214771
YKR009C	FOX2	fox2	-0.07212	-1.11252	0.03239	0.297773	-0.00941	-0.214645
YDL131W	LYS21	lys21	-0.02838	-0.480417	-0.05995	-0.93451	-0.0094	-0.214518
YOL088C	MPD2	mpd2	-0.01864	-0.339661	-0.03241	-0.566987	-0.00938	-0.214265
YML120C	NDI1	ndi1	-0.0013	-0.0890732	-0.01073	-0.277666	-0.00938	-0.214265
YLR349W	YLR349W	ylr349w	-0.00014	-0.0723096	0.02143	0.151512	-0.00938	-0.214265
YGL257C	MNT2	mnt2	0.00824	0.0487932	0.03223	0.295638	-0.00937	-0.214139
YMR233W	TRI1	tri1	-0.02381	-0.414374	0.0566	0.620857	-0.00936	-0.214012
YMR284W	YKU70	yku70	-0.0093	-0.204684	-0.0263	-0.485448	-0.00933	-0.213633
YJL104W	PAM16	pam16-3	0.04709	0.61023	0.02206	0.159919	-0.00933	-0.213633
YFR016C	YFR016C	yfr016c	0.02987	0.361377	0.01601	0.0791813	-0.00932	-0.213506
YDR423C	CAD1	cad1	0.00595	0.0156995	-0.17696	-2.49602	-0.00931	-0.21338
YLR354C	TAL1	tal1	-0.04009	-0.649643	-0.00273	-0.170905	-0.00931	-0.21338
YDL199C	YDL199C	ydl199c	-0.00838	-0.191389	0.00213	-0.106048	-0.0093	-0.213253
YCL051W	LRE1	lre1	-0.02401	-0.417265	0.04596	0.478866	-0.00929	-0.213127
YOR039W	CKB2	ckb2	0.01243	0.109345	0.0966	1.15466	-0.00929	-0.213127
YMR068W	AVO2	avo2	-0.01209	-0.245004	0.02283	0.170195	-0.00928	-0.213
YKL048C	ELM1	elm1	-0.02434	-0.422034	0.027985	0.238988	-0.009265	-0.21281
YJR112W	NNF1	nnf1-17	0.03274	0.402853	-0.05933	-0.926236	-0.00926	-0.212747
YDL123W	SNA4	sna4	0.00199	-0.0415281	-0.00886	-0.25271	-0.00925	-0.212621
YDR165W	TRM82	trm82	-0.01304	-0.258733	-0.04261	-0.703106	-0.00923	-0.212368
YBR210W	ERV15	erv15	0.00815	0.0474926	0.02041	0.1379	-0.00922	-0.212241
YKR077W	MSA2	msa2	-0.02792	-0.47377	-0.01258	-0.302354	-0.0092	-0.211988
YBL054W	TOD6	tod6	-0.01703	-0.316394	0.00489	-0.0692158	-0.0092	-0.211988
YBR207W	FTH1	fth1	-0.00228	-0.103236	-0.03262	-0.569789	-0.00916	-0.211482
YJL050W	MTR4	mtr4-1	-0.1059	-1.60069	-0.00951	-0.261385	-0.00916	-0.211482
YDR182W	CDC1	cdc1-4	-0.02588	-0.444289	0.03443	0.324997	-0.00915	-0.211356
YOR191W	ULS1	uls1	-0.01991	-0.358014	-0.11246	-1.63526	-0.00911	-0.21085
YJL208C	NUC1	nuc1	-0.02504	-0.43215	-0.01442	-0.326909	-0.00908	-0.21047
YPL133C	RDS2	rds2	-0.00562	-0.151503	0.02452	0.192748	-0.00902	-0.209711
YDL133W	SRF1	srf1	-0.03504	-0.576664	-0.03634	-0.619433	-0.00901	-0.209585
YCR083W	TRX3	trx3	-0.01501	-0.287202	0.0084	-0.0223747	-0.009	-0.209458
YLR393W	ATP10	atp10	-0.02887	-0.487499	-0.043105	-0.709712	-0.008995	-0.209395
YHR080C	YHR080C	yhr080c	-0.02439	-0.422756	-0.04376	-0.718453	-0.00898	-0.209205
YDR184C	ATC1	atc1	-0.00333	-0.11841	-0.0581	-0.909821	-0.00897	-0.209079
YGL205W	POX1	pox1	-0.05112	-0.809042	-0.07413	-1.12374	-0.00893	-0.208573
YBR183W	YPC1	ypc1	-0.0169	-0.314515	0.00418	-0.0786908	-0.0089	-0.208193
YOR317W	FAA1	faa1	-0.02125	-0.377379	-0.03654	-0.622102	-0.00888	-0.20794
YBR205W	KTR3	ktr3	0.01068	0.0840546	-0.0482	-0.777705	-0.00887	-0.207814
YAR002C-A	ERP1	erp1	-0.00315	-0.115808	-0.00579	-0.211741	-0.00887	-0.207814
YOL006C	TOP1	top1	0.01704	0.175966	0.00335	-0.0897672	-0.00886	-0.207687
YJL030W	MAD2	mad2	-0.00917	-0.202806	-0.00064	-0.143014	-0.00885	-0.207561
YDL017W	CDC7	cdc7-4	-0.06387	-0.993298	0.17995	2.26697	-0.00885	-0.207561
YOR054C	VHS3	vhs3	-0.01553	-0.294717	-0.08353	-1.24919	-0.00883	-0.207308
YOR315W	SFG1	sfg1	-0.01044	-0.221159	0.01747	0.0986651	-0.00883	-0.207308
YDR274C	YDR274C	ydr274c	0.0004	-0.0645058	0.03004	0.266413	-0.00883	-0.207308
YAL023C	PMT2	pmt2	0.01183	0.100674	0.03573	0.342346	-0.0088	-0.206928
YIR020C	YIR020C	yir020c	-0.02342	-0.408738	0.04462	0.460984	-0.00878	-0.206675
YJL135W	YJL135W	yjl135w	-0.0108	-0.226362	0.01853	0.112811	-0.00877	-0.206549
YMR180C	CTL1	ctl1	0.0137	0.127698	-0.00035	-0.139144	-0.00876	-0.206422
YBL104C	SEA4	sea4	-0.016	-0.301509	0.0402	0.401998	-0.00866	-0.205157
YBR069C	TAT1	tat1	-0.03227	-0.536633	0.02507	0.200088	-0.00862	-0.204651
YLR077W	FMP25	fmp25	-0.02133	-0.378535	0.03306	0.306715	-0.00862	-0.204651
YFR022W	ROG3	rog3	-0.02938	-0.494869	-0.03137	-0.553108	-0.00861	-0.204525
YLR150W	STM1	stm1	-0.00282	-0.111039	-0.0401	-0.66961	-0.0086	-0.204398
YJL206C	YJL206C	yjl206c-a	-0.13145	-1.96992	-0.07573	-1.14509	-0.00855	-0.203766
YJR069C	HAM1	ham1	0.00678	0.0276942	-0.12879	-1.85318	-0.00851	-0.20326
YDR199W	YDR199W	ydr199w	-0.00591	-0.155694	0.08596	1.01267	-0.0085	-0.203133
YGR084C	MRP13	mrp13	0.03271	0.402419	0.04448	0.459115	-0.00849	-0.203007
YDR338C	YDR338C	ydr338c	-0.0052	-0.145434	0.0567	0.622192	-0.00849	-0.203007
YGL093W	SPC105	spc105-15	0.00638	0.0219136	0.0226	0.167125	-0.00844	-0.202374
YBR043C	QDR3	qdr3	0.01033	0.0789967	-0.03064	-0.543366	-0.00842	-0.202121
YJR134C	SGM1	sgm1	0.00438	-0.00698923	0.03795	0.371972	-0.00842	-0.202121
YMR104C	YPK2	ypk2	0.00738	0.036365	-0.0055	-0.207871	-0.00841	-0.201995
YDR277C	MTH1	mth1	-0.00344	-0.119999	-0.01695	-0.360672	-0.00836	-0.201362
YLR196W	PWP1	pwp1-ph	0.03432	0.425686	0.08787	1.03816	-0.00836	-0.201362
YDR141C	DOP1	dop1-1	-0.01632	-0.306133	0.09911	1.18816	-0.00836	-0.201362
YDR504C	SPG3	spg3	-0.01197	-0.24327	0.00063	-0.126066	-0.00834	-0.201109
YBR051W	YBR051W	ybr051w	-0.05741	-0.899942	-0.02714	-0.496658	-0.00828	-0.20035
YOR277C	YOR277C	yor277c	-0.05555	-0.873062	-0.01634	-0.352532	-0.00828	-0.20035
YGL075C	MPS2	mps2-2	-0.28104	-4.13171	0.21447	2.72764	-0.00826	-0.200097
YGR196C	FYV8	fyv8	-0.0206	-0.367985	0.01695	0.0917256	-0.00824	-0.199844
YJL130C	URA2	ura2	-0.06661	-1.03289	0.02584	0.210363	-0.00822	-0.199591
YJR148W	BAT2	bat2	0.00339	-0.0212961	0.04512	0.467656	-0.0082	-0.199338
YAL007C	ERP2	erp2	-0.02447	-0.423912	0.07069	0.808889	-0.00817	-0.198959
YHR155W	YSP1	ysp1	0.00427	-0.00857888	0.01197	0.0252672	-0.00816	-0.198832
YCR036W	RBK1	rbk1	0.0114	0.0944597	-0.04464	-0.730197	-0.00815	-0.198706
YGR053C	YGR053C	ygr053c	0.02048	0.225678	-0.02919	-0.524016	-0.00815	-0.198706
YHR196W	UTP9	utp9-ph	-0.04898	-0.778116	-0.08396	-1.25492	-0.00814	-0.198579
YPL107W	YPL107W	ypl107w	-0.03299	-0.547038	0.00156	-0.113655	-0.00814	-0.198579
YLR387C	REH1	reh1	-0.01398	-0.272317	0.0457	0.475396	-0.00813	-0.198453
YNR022C	MRPL50	mrpl50	-0.00237	-0.104536	-0.04464	-0.730197	-0.00811	-0.1982
YML075C	HMG1	hmg1	-0.00589	-0.155405	0.02141	0.151245	-0.00811	-0.1982
YDL064W	UBC9	ubc9-2	0.05588	0.737258	-0.08531	-1.27294	-0.00803	-0.197188
YDR389W	SAC7	sac7	-0.01548	-0.293994	0.02525	0.20249	-0.00803	-0.197188
YKL007W	CAP1	cap1	-0.01073	-0.22535	0.00471	-0.071618	-0.00802	-0.197061
YPL052W	OAZ1	oaz1	0.00648	0.0233587	-0.03183	-0.559247	-0.00801	-0.196935
YHR123W	EPT1	ept1	-0.00498	-0.142254	-0.0174	-0.366677	-0.008	-0.196808
YOL011W	PLB3	plb3	-0.01861	-0.339227	0.02258	0.166858	-0.008	-0.196808
YPL090C	RPS6A	rps6a	0.01318	0.120183	0.0567	0.622192	-0.008	-0.196808
YNL108C	YNL108C	ynl108c	-0.02408	-0.418276	-0.02139	-0.419924	-0.00794	-0.196049
YMR319C	FET4	fet4	0.01783	0.187382	0.00109	-0.119927	-0.00792	-0.195796
YNL115C	YNL115C	ynl115c	-0.00706	-0.172313	-5e-05	-0.13514	-0.0079	-0.195543
YKL147C	YKL147C	ykl147c	-0.01069	-0.224772	0.00781	-0.0302483	-0.0079	-0.195543
YPL033C	SRL4	srl4	-0.01801	-0.330556	-0.06018	-0.937579	-0.00788	-0.19529
YOL162W	YOL162W	yol162w	-0.0138	-0.269716	0.02319	0.174999	-0.00788	-0.19529
YOR375C	GDH1	gdh1	0.04696	0.608352	0.00098	-0.121395	-0.00779	-0.194152
YBR098W	YBR100W	ybr100w	0.00172	-0.04543	-0.03421	-0.591008	-0.00775	-0.193646
YOL082W	ATG19	atg19	0.11064	1.52862	0.10696	1.29291	-0.00775	-0.193646
YBR076W	ECM8	ecm8	0.03202	0.392448	0.06233	0.697325	-0.00768	-0.19276
YMR289W	ABZ2	abz2	-0.02284	-0.400357	-0.04987	-0.799992	-0.00767	-0.192634
YGR017W	YGR017W	ygr017w	-0.02045	-0.365818	-0.01975	-0.398038	-0.00766	-0.192507
YHL044W	YHL044W	yhl044w	0.00376	-0.0159491	0.01619	0.0815834	-0.00766	-0.192507
YLR461W	PAU4	pau4	-0.00318	-0.116242	-0.01696	-0.360806	-0.00764	-0.192254
YHL016C	DUR3	dur3	0.01455	0.139982	-0.01053	-0.274997	-0.00762	-0.192001
YKR065C	PAM17	pam17	0.0045	-0.00525506	-0.09476	-1.39905	-0.00758	-0.191495
YHR028C	DAP2	dap2	-0.00157	-0.0929751	-0.02244	-0.433936	-0.00757	-0.191369
YML018C	YML018C	yml018c	-0.04587	-0.733172	-0.04029	-0.672146	-0.00756	-0.191242
YLR017W	MEU1	meu1	0.02793	0.333341	-0.01338	-0.31303	-0.00756	-0.191242
YOR021C	SFM1	sfm1	-0.02623	-0.449347	0.07696	0.892563	-0.00756	-0.191242
YAR018C	KIN3	kin3	0.0428	0.548234	0.08485	0.997855	-0.00755	-0.191116
YDR438W	THI74	thi74	-0.01389	-0.271016	-0.03202	-0.561782	-0.00753	-0.190863
YFR019W	FAB1	fab1	0.08593	1.17152	-0.02699	-0.494656	-0.00753	-0.190863
YPR008W	HAA1	haa1	-0.00298	-0.113352	-0.0203	-0.405378	-0.00751	-0.19061
YCL024W	KCC4	kcc4	-0.08461	-1.29302	-0.01721	-0.364142	-0.00746	-0.189977
YLR166C	SEC10	sec10-2	0.00293	-0.0279438	0.06105	0.680243	-0.00745	-0.189851
YFL028C	CAF16	caf16	-0.00763	-0.180551	0.01682	0.0899908	-0.00742	-0.189471
YKL106W	AAT1	aat1	-0.01858	-0.338794	0.00802	-0.0274458	-0.00736	-0.188712
YDR387C	YDR387C	ydr387c	0.0132	0.120472	0.02952	0.259473	-0.00735	-0.188586
YOR354C	MSC6	msc6	-0.0589	-0.921474	-0.01123	-0.284338	-0.00731	-0.18808
YHR191C	CTF8	ctf8-9	-0.04257	-0.685483	-0.07627	-1.1523	-0.00729	-0.187827
YLR241W	YLR241W	ylr241w	-0.02593	-0.445011	-0.00371	-0.183983	-0.00728	-0.1877
YLR224W	YLR224W	ylr224w	-0.01717	-0.318417	0.0252	0.201822	-0.00725	-0.187321
YGR025W	YGR025W	ygr025w	-0.00622	-0.160174	0.03268	0.301643	-0.00723	-0.187068
YCL036W	GFD2	gfd2	0.00613	0.0183007	0.03631	0.350086	-0.00723	-0.187068
YLR044C	PDC1	pdc1	-0.01844	-0.33677	-0.00808	-0.242301	-0.00722	-0.186941
YAL046C	AIM1	aim1	-0.02295	-0.401946	-0.00764	-0.23643	-0.00722	-0.186941
YDR143C	SAN1	san1	0.00306	-0.0260651	-0.01607	-0.348928	-0.00721	-0.186815
YGR228W	YGR228W	ygr228w	-0.00083	-0.0822811	0.04379	0.449907	-0.00714	-0.185929
YLR225C	YLR225C	ylr225c	-0.04004	-0.648921	-0.03004	-0.535359	-0.0071	-0.185423
YNL130C	CPT1	cpt1	0.00381	-0.0152265	-0.03334	-0.579398	-0.00706	-0.184917
YCR073C	SSK22	ssk22	0.00063	-0.061182	-0.02601	-0.481578	-0.00706	-0.184917
YDR400W	URH1	urh1	0.00826	0.0490822	-0.00831	-0.245371	-0.00704	-0.184664
YPR055W	SEC8	sec8-6	-0.01943	-0.351077	0.00941	-0.00889616	-0.00704	-0.184664
YLR279W	YLR279W	ylr279w	-0.027	-0.460474	-0.32299	-4.4448	-0.00696	-0.183652
YLR111W	YLR111W	ylr111w	-0.04919	-0.781151	-0.02386	-0.452886	-0.00695	-0.183526
YNR028W	CPR8	cpr8	-0.00869	-0.195869	-0.05993	-0.934243	-0.00694	-0.183399
YMR171C	EAR1	ear1	-0.02545	-0.438075	0.00483	-0.0700166	-0.00693	-0.183273
YMR275C	BUL1	bul1	0.00633	0.021191	0.02195	0.158451	-0.00691	-0.18302
YNR058W	BIO3	bio3	-0.04411	-0.707738	-0.02469	-0.463963	-0.00688	-0.18264
YBR217W	ATG12	atg12	-0.01565	-0.296451	-0.0081	-0.242568	-0.00687	-0.182514
YOR002W	ALG6	alg6	0.00451	-0.00511054	0.10496	1.26622	-0.00686	-0.182387
YCL037C	SRO9	sro9	0.04068	0.517597	-0.02588	-0.479843	-0.00685	-0.182261
YDR408C	ADE8	ade8	-0.03269	-0.542703	-0.02135	-0.41939	-0.00685	-0.182261
YGR136W	LSB1	lsb1	0.01305	0.118304	-0.038	-0.641586	-0.00684	-0.182134
YGR264C	MES1	mes1-1	-0.03562	-0.585046	0.10313	1.2418	-0.00681	-0.181755
YDL224C	WHI4	whi4	0.01189	0.101541	-0.00195	-0.160496	-0.00677	-0.181249
YBR246W	RRT2	rrt2	-0.0113	-0.233587	-0.00139	-0.153023	-0.00677	-0.181249
YBL015W	ACH1	ach1	-0.01604	-0.302087	-0.06932	-1.05955	-0.00673	-0.180743
YLR423C	ATG17	atg17	-0.01259	-0.25223	0.03222	0.295505	-0.0067	-0.180363
YCL035C	GRX1	grx1	-0.01022	-0.21798	0.03511	0.334072	-0.0067	-0.180363
YDR088C	SLU7	slu7-ts1	-0.01594	-0.300642	-0.00359	-0.182382	-0.00662	-0.179351
YER188W	YER188W	yer188w	-0.02382	-0.414519	0.06685	0.757644	-0.00662	-0.179351
YFL030W	AGX1	agx1	-0.01977	-0.355991	-0.04173	-0.691363	-0.00661	-0.179225
YDR128W	MTC5	mtc5	-0.00047	-0.0770786	0.02415	0.18781	-0.00658	-0.178845
YJL151C	SNA3	sna3	0.00305	-0.0262096	0.00737	-0.0361201	-0.00656	-0.178592
YLR072W	YLR072W	ylr072w	-0.00228	-0.103236	-0.00531	-0.205336	-0.00654	-0.178339
YDR311W	TFB1	tfb1-6	-0.03432	-0.566259	0.08607	1.01414	-0.00652	-0.178086
YOR120W	GCY1	gcy1	0.001	-0.055835	-0.03274	-0.571391	-0.00651	-0.17796
YAL054C	ACS1	acs1	0.01272	0.113536	0.00069	-0.125265	-0.00651	-0.17796
YJR106W	ECM27	ecm27	0.02477	0.287675	-0.00883	-0.25231	-0.0065	-0.177833
YPR033C	HTS1	hts1-1	0.04667	0.604161	0.07363	0.848124	-0.00645	-0.177201
YBR116C	YBR116C	ybr116c	-0.00327	-0.117542	-0.03494	-0.60075	-0.00643	-0.176948
YLR264W	RPS28B	rps28b	-0.01106	-0.230119	0.08957	1.06084	-0.00643	-0.176948
YJL095W	BCK1	bck1	-0.05203	-0.822193	0.00652	-0.0474634	-0.00637	-0.176189
YAL060W	BDH1	bdh1	-0.00795	-0.185175	0.05325	0.576151	-0.00636	-0.176062
YOR125C	CAT5	cat5	-0.00411	-0.129682	0.01723	0.0954622	-0.00635	-0.175936
YDL093W	PMT5	pmt5	-0.01762	-0.32492	0.04955	0.526775	-0.0063	-0.175303
YDL012C	YDL012C	ydl012c	0.00512	0.00370482	-0.00974	-0.264454	-0.00629	-0.175177
YGL140C	YGL140C	ygl140c	0.01952	0.211805	-0.03308	-0.575928	-0.00626	-0.174797
YHR107C	CDC12	cdc12-td	0.07024	0.944781	-0.07158	-1.08971	-0.00622	-0.174291
YNL104C	LEU4	leu4	-0.00663	-0.166099	0.01185	0.0236658	-0.00621	-0.174165
YBL097W	BRN1	brn1-16	0.01672	0.171341	0.03641	0.351421	-0.00618	-0.173785
YNR040W	YNR040W	ynr040w	0.02004	0.21932	-0.01063	-0.276331	-0.00617	-0.173659
YIL015C	YIL015C	yil015c-a	-0.01966	-0.354401	-0.05883	-0.919563	-0.00615	-0.173406
YDR009W	GAL3	gal3	-0.02798	-0.474637	0.00459	-0.0732194	-0.0061	-0.172773
YBR040W	FIG1	fig1	-0.00346	-0.120288	-0.04354	-0.715517	-0.00609	-0.172647
YPR158W	CUR1	cur1	-0.04334	-0.69661	-0.00155	-0.155158	-0.00607	-0.172394
YGR169C	PUS6	pus6	0.00849	0.0524061	0.02021	0.135231	-0.00607	-0.172394
YPR027C	YPR027C	ypr027c	-0.04375	-0.702535	0.02773	0.235585	-0.00607	-0.172394
YGR138C	TPO2	tpo2	-0.00175	-0.0955764	0.01027	0.0025806	-0.00606	-0.172267
YPL230W	USV1	usv1	-0.02277	-0.399345	-0.03693	-0.627306	-0.00603	-0.171888
YCL026C	YCL026C	ycl026c	-0.01998	-0.359026	-0.01688	-0.359738	-0.00603	-0.171888
YLR237W	THI7	thi7	-0.01711	-0.31755	-0.02264	-0.436605	-0.00601	-0.171635
YHR049W	FSH1	fsh1	0.00784	0.0430126	0.01233	0.0300714	-0.00601	-0.171635
YLR361C	DCR2	dcr2	-0.01159	-0.237778	-0.0533	-0.845765	-0.00598	-0.171255
YGR212W	SLI1	sli1	-0.01374	-0.268849	-0.03243	-0.567254	-0.00595	-0.170876
YGL085W	LCL3	lcl3	0.00857	0.0535622	0.03415	0.321261	-0.00595	-0.170876
YBR212W	NGR1	ngr1	-0.02639	-0.451659	0.03073	0.275621	-0.00593	-0.170623
YNL095C	YNL095C	ynl095c	-0.00424	-0.13156	-0.02952	-0.52842	-0.00591	-0.17037
YCR093W	CDC39	cdc39-1	0.0067	0.026538	-0.04857	-0.782643	-0.0059	-0.170243
YBR041W	FAT1	fat1	0.00661	0.0252374	-0.02334	-0.445947	-0.00588	-0.16999
YJL150W	YJL150W	yjl150w	-0.01108	-0.230408	-0.00232	-0.165434	-0.00585	-0.169611
YJR017C	ESS1	ess1-h164r	0.00589	0.0148324	0.09761	1.16814	-0.00585	-0.169611
YDL113C	ATG20	atg20	-0.01195	-0.242981	-0.07703	-1.16244	-0.00577	-0.168599
YGL005C	COG7	cog7	0.00865	0.0547183	0.05218	0.561872	-0.00577	-0.168599
YMR306C	YMR306C	ymr306c-a	-0.03435	-0.566692	-0.01788	-0.373083	-0.00574	-0.168219
YBL071C	YBL071C	ybl071c	-0.02848	-0.481862	0.01724	0.0955957	-0.00572	-0.167966
YOR140W	SFL1	sfl1	0.02881	0.346059	0.01611	0.0805158	-0.00565	-0.167081
YOR339C	UBC11	ubc11	0.02808	0.335509	-0.02867	-0.517076	-0.00561	-0.166575
YCR087W	YCR087W	ycr087w	-0.01878	-0.341684	-0.01114	-0.283137	-0.00556	-0.165942
YDL079C	MRK1	mrk1	0.00451	-0.00511054	-0.01857	-0.382291	-0.00552	-0.165436
YJL198W	PHO90	pho90	-0.04442	-0.712218	-0.00759	-0.235762	-0.0055	-0.165183
YDL100C	GET3	get3	0.00902	0.0600653	-0.03644	-0.620767	-0.00546	-0.164677
YMR163C	INP2	inp2	0.00486	-5.25503e-05	-0.01727	-0.364942	-0.00545	-0.164551
YOL060C	MAM3	mam3	0.0248	0.288109	-0.00699	-0.227755	-0.00541	-0.164045
YJL170C	ASG7	asg7	0.00684	0.0285612	0.03885	0.383983	-0.00541	-0.164045
YNL085W	MKT1	mkt1	0.0019	-0.0428287	-0.01845	-0.38069	-0.00539	-0.163792
YOL050C	YOL050C	yol050c	-0.00207	-0.100201	-0.00501	-0.201332	-0.00539	-0.163792
YOR291W	YPK9	ypk9	0.00024	-0.0668181	-0.00175	-0.157827	-0.00539	-0.163792
YLR053C	YLR053C	ylr053c	0.02057	0.226979	0.01689	0.0909249	-0.00538	-0.163665
YER177W	BMH1	bmh1	0.01052	0.0817424	-0.05078	-0.812136	-0.00536	-0.163412
YKL026C	GPX1	gpx1	0.01423	0.135357	-0.01523	-0.337719	-0.00535	-0.163286
YCR007C	YCR007C	ycr007c	0.00395	-0.0132033	-0.00343	-0.180247	-0.00534	-0.163159
YDR346C	SVF1	svf1	0.03289	0.40502	0.04628	0.483136	-0.00533	-0.163033
YLL011W	SOF1	sof1-ph	-0.07403	-1.14012	-0.04732	-0.765962	-0.00531	-0.16278
YLL061W	MMP1	mmp1	-0.00577	-0.153671	-0.05124	-0.818274	-0.00526	-0.162147
YJL171C	YJL171C	yjl171c	0.01045	0.0807308	0.06116	0.681711	-0.00526	-0.162147
YGL002W	ERP6	erp6	0.01773	0.185937	-0.0181	-0.376019	-0.00525	-0.162021
YBR172C	SMY2	smy2	0.00561	0.010786	-0.0175	-0.368012	-0.00523	-0.161768
YHR162W	MPC2	mpc2	-0.01426	-0.276363	0.04467	0.461651	-0.00523	-0.161768
YKL096W-A	CWP2	cwp2	0.00905	0.0604988	0.00021	-0.131671	-0.00521	-0.161515
YDR171W	HSP42	hsp42	-0.01839	-0.336048	-0.0015	-0.154491	-0.00519	-0.161262
YCR090C	YCR090C	ycr090c	-0.05117	-0.809765	-0.01284	-0.305824	-0.00518	-0.161135
YBL008W	HIR1	hir1	0.03655	0.457913	0.04716	0.49488	-0.00518	-0.161135
YJL122W	ALB1	alb1	0.01813	0.191718	0.03587	0.344214	-0.00516	-0.160882
YBR263W	SHM1	shm1	-0.015	-0.287058	-0.00824	-0.244437	-0.00514	-0.160629
YOL118C	YOL118C	yol118c	-0.00502	-0.142832	0.0289	0.251199	-0.00514	-0.160629
YDL156W	CMR1	cmr1	-0.00951	-0.207719	-0.03314	-0.576729	-0.00511	-0.16025
YBR203W	COS111	cos111	-0.02524	-0.43504	-0.01345	-0.313964	-0.00509	-0.159997
YAL053W	FLC2	flc2	0.02245	0.254148	0.04908	0.520503	-0.00508	-0.15987
YGR221C	TOS2	tos2	0.01167	0.0983615	-0.02144	-0.420591	-0.00507	-0.159744
YAL061W	BDH2	bdh2	-0.01011	-0.21639	-0.0588	-0.919163	-0.00506	-0.159617
YDR049W	VMS1	vms1	-0.055095	-0.866487	-0.084265	-1.259	-0.00506	-0.159617
YDR524C	AGE1	age1	-0.01346	-0.264802	0.02801	0.239322	-0.00504	-0.159364
YNL092W	YNL092W	ynl092w	-0.02395	-0.416398	-0.01699	-0.361206	-0.005	-0.158858
YGR110W	CLD1	cld1	0.01891	0.20299	-0.01362	-0.316233	-0.00497	-0.158479
YGR290W	YGR290W	ygr290w	0.0418	0.533782	-8e-05	-0.135541	-0.00497	-0.158479
YNL082W	PMS1	pms1	-0.03861	-0.628255	-0.40255	-5.50653	-0.00491	-0.15772
YGR226C	YGR226C	ygr226c	-0.01027	-0.218702	-0.0077	-0.23723	-0.0049	-0.157593
YKL107W	YKL107W	ykl107w	-0.01146	-0.2359	0.01354	0.046219	-0.00486	-0.157087
YOR027W	STI1	sti1	0.00031	-0.0658065	0.01511	0.0671707	-0.00486	-0.157087
YHR202W	YHR202W	yhr202w	0.0266	0.314121	-0.03574	-0.611426	-0.00481	-0.156455
YGL139W	FLC3	flc3	-0.06585	-1.02191	-0.07421	-1.12481	-0.00479	-0.156202
YBR250W	SPO23	spo23	0.02278	0.258917	-0.03016	-0.53696	-0.00479	-0.156202
YDR228C	PCF11	pcf11-2	-0.06633	-1.02885	-0.01552	-0.341589	-0.00479	-0.156202
YDR003W	RCR2	rcr2	-0.03258	-0.541113	-0.00327	-0.178112	-0.00474	-0.155569
YFL039C	ACT1	act1-124	-0.03231	-0.537211	-0.19767	-2.77239	-0.00472	-0.155316
YDL085W	NDE2	nde2	-0.01176	-0.240235	-0.01638	-0.353065	-0.00468	-0.15481
YOL054W	PSH1	psh1	0.00149	-0.0487538	0.04972	0.529043	-0.00466	-0.154557
YBL056W	PTC3	ptc3	-0.01241	-0.249628	0.02655	0.219838	-0.00465	-0.154431
YAL002W	VPS8	vps8	-0.02871	-0.485186	0.04611	0.480868	-0.00465	-0.154431
YIL124W	AYR1	ayr1	-0.01223	-0.247027	-0.01629	-0.351864	-0.00464	-0.154304
YLR420W	URA4	ura4	0.01174	0.0993731	0.0223	0.163122	-0.00462	-0.154051
YJR116W	TDA4	tda4	-0.00929	-0.20454	0.00913	-0.0126328	-0.00459	-0.153672
YDL133C-A	RPL41B	rpl41b	-0.00576	-0.153527	-0.00982	-0.265522	-0.00458	-0.153545
YBR016W	YBR016W	ybr016w	-0.0314	-0.524061	-0.009	-0.254579	-0.00457	-0.153419
YML108W	YML108W	yml108w	0.02997	0.362822	0.01643	0.0847862	-0.00454	-0.153039
YAL065C	YAL065C	yal065c	-0.02399	-0.416976	-0.00676	-0.224686	-0.00449	-0.152407
YMR280C	CAT8	cat8	0.06012	0.798532	-0.00347	-0.180781	-0.00448	-0.15228
YDR097C	MSH6	msh6	-0.00782	-0.183296	-0.44544	-6.0789	-0.00444	-0.151774
YLR042C	YLR042C	ylr042c	-0.01734	-0.320874	-0.00792	-0.240166	-0.00444	-0.151774
YHL022C	SPO11	spo11	-0.01177	-0.240379	0.08145	0.952482	-0.00443	-0.151648
YKL035W	UGP1	ugp1-ph	0.02231	0.252125	0.08117	0.948746	-0.00442	-0.151521
YMR282C	AEP2	aep2	-0.02283	-0.400212	-0.04065	-0.67695	-0.0044	-0.151268
YDR374C	YDR374C	ydr374c	-0.00802	-0.186187	-0.01863	-0.383092	-0.0044	-0.151268
YIR030C	DCG1	dcg1	-0.00365	-0.123034	-0.02598	-0.481178	-0.00437	-0.150889
YJL153C	INO1	ino1	0.01836	0.195041	-0.02368	-0.450484	-0.00436	-0.150762
YDR014W	RAD61	rad61	-0.00575	-0.153382	0.02439	0.191013	-0.00435	-0.150636
YOR371C	GPB1	gpb1	-0.04593	-0.73404	-0.00447	-0.194126	-0.00434	-0.150509
YOR226C	ISU2	isu2	-0.01258	-0.252085	0.00412	-0.0794915	-0.00423	-0.149118
YML097C	VPS9	vps9	0.00428	-0.00843437	0.03339	0.311118	-0.00423	-0.149118
YGL248W	PDE1	pde1	-0.01211	-0.245293	-0.00476	-0.197996	-0.0042	-0.148738
YLR296W	YLR296W	ylr296w	0.00359	-0.0184058	0.00318	-0.0920359	-0.0042	-0.148738
YHR209W	CRG1	crg1	-0.08194	-1.25443	0.0179	0.104403	-0.0042	-0.148738
YLL045C	RPL8B	rpl8b	-0.04402	-0.706437	-0.0542	-0.857776	-0.00419	-0.148612
YJR152W	DAL5	dal5	0.01448	0.13897	0.00052	-0.127534	-0.00419	-0.148612
YKR033C	YKR033C	ykr033c	-0.01043	-0.221015	-0.03764	-0.636781	-0.00418	-0.148485
YMR103C	YMR103C	ymr103c	0.00738	0.036365	-0.03758	-0.635981	-0.00416	-0.148232
YPR016C	TIF6	tif6-ts1	0.04992	0.651128	0.01175	0.0223313	-0.00415	-0.148106
YHR117W	TOM71	tom71	-0.00634	-0.161908	-0.00478	-0.198263	-0.00414	-0.147979
YMR186W	HSC82	hsc82	0.03577	0.44664	-0.00653	-0.221616	-0.00412	-0.147726
YGR234W	YHB1	yhb1	-0.04678	-0.746323	-0.06882	-1.05288	-0.00403	-0.146588
YIL002C	INP51	inp51	0.00787	0.0434462	0.00865	-0.0190384	-0.00403	-0.146588
YOL016C	CMK2	cmk2	-0.01615	-0.303677	0.01545	0.071708	-0.00401	-0.146335
YPR068C	HOS1	hos1	-0.024	-0.41712	-0.02017	-0.403643	-0.00397	-0.145829
YML119W	YML119W	yml119w	-0.00389	-0.126502	0.02673	0.22224	-0.00397	-0.145829
YDL154W	MSH5	msh5	0.0017	-0.045719	-0.00786	-0.239365	-0.00396	-0.145702
YBL063W	KIP1	kip1	-0.01548	-0.293994	0.01978	0.129492	-0.00396	-0.145702
YIL027C	EMC5	emc5	0.00713	0.0327521	0.0151	0.0670373	-0.00395	-0.145576
YOL073C	YOL073C	yol073c	-0.0084	-0.191678	-0.02225	-0.431401	-0.00393	-0.145323
YAR028W	YAR028W	yar028w	-0.005	-0.142543	-0.00503	-0.201599	-0.0039	-0.144943
YDL189W	RBS1	rbs1	-0.03374	-0.557877	-0.08868	-1.31791	-0.00389	-0.144817
YJL216C	IMA5	ima5	0.01403	0.132467	-0.0431	-0.709645	-0.00388	-0.14469
YLR047C	FRE8	fre8	0.01103	0.0891126	0.04825	0.509426	-0.00387	-0.144564
YDR006C	SOK1	sok1	-0.00309	-0.114941	-0.06923	-1.05835	-0.00385	-0.144311
YLR236C	YLR236C	ylr236c	0.01385	0.129866	0.03205	0.293236	-0.00384	-0.144184
YDR010C	YDR010C	ydr010c	0.00581	0.0136763	0.04696	0.492211	-0.00384	-0.144184
YFL039C	ACT1	act1-105	0.45759	6.54253	0.26543	3.40771	-0.00383	-0.144058
YGR045C	YGR045C	ygr045c	0.03848	0.485804	-0.04145	-0.687626	-0.00382	-0.143931
YDL076C	RXT3	rxt3	-0.03784	-0.617128	0.10206	1.22752	-0.00382	-0.143931
YMR102C	YMR102C	ymr102c	-0.01085	-0.227084	0.01307	0.0399468	-0.00381	-0.143805
YPL222W	FMP40	fmp40	-0.07541	-1.16007	0.00201	-0.10765	-0.00377	-0.143299
YPL114W	YPL114W	ypl114w	0.08153	1.10794	0.01865	0.114412	-0.00377	-0.143299
YMR164C	MSS11	mss11	0.0297	0.35892	-0.05177	-0.825347	-0.00375	-0.143046
YDR426C	YDR426C	ydr426c	-0.01253	-0.251363	-0.01051	-0.27473	-0.00372	-0.142666
YHR126C	ANS1	ans1	0.00307	-0.0259206	-0.02638	-0.486516	-0.0037	-0.142413
YPL068C	YPL068C	ypl068c	0.00521	0.00500544	0.02354	0.17967	-0.0037	-0.142413
YOR347C	PYK2	pyk2	-0.002	-0.0991892	-0.02526	-0.47157	-0.00367	-0.142034
YDR259C	YAP6	yap6	0.00013	-0.0684077	-0.04303	-0.708711	-0.00365	-0.141781
YBR157C	ICS2	ics2	0.00297	-0.0273657	-0.0281	-0.50947	-0.00365	-0.141781
YMR318C	ADH6	adh6	0.01998	0.218453	0.02439	0.191013	-0.0036	-0.141148
YLR098C	CHA4	cha4	0.00485	-0.000197064	-0.05199	-0.828283	-0.00356	-0.140642
YOR173W	DCS2	dcs2	-0.04219	-0.679991	-0.02992	-0.533758	-0.00355	-0.140516
YGL230C	YGL230C	ygl230c	0.00945	0.0662794	-0.04434	-0.726193	-0.00354	-0.140389
YIL146C	ATG32	atg32	0.02798	0.334064	-0.00711	-0.229357	-0.00354	-0.140389
YIL006W	YIA6	yia6	0.00923	0.0631001	0.01701	0.0925263	-0.00352	-0.140136
YGL217C	YGL217C	ygl217c	0.0089	0.0583311	-0.04544	-0.740873	-0.0035	-0.139883
YOR221C	MCT1	mct1	-0.0663	-1.02841	-0.01716	-0.363475	-0.0035	-0.139883
YIR010W	DSN1	dsn1-8	0.04288	0.54939	0.05632	0.617121	-0.0035	-0.139883
YMR057C	YMR057C	ymr057c	-0.00228	-0.103236	-0.02073	-0.411116	-0.00349	-0.139757
YBR054W	YRO2	yro2	0.00701	0.031018	-0.01507	-0.335583	-0.00348	-0.13963
YJR127C	RSF2	rsf2	-0.00505	-0.143266	-0.02224	-0.431267	-0.00347	-0.139504
YGL130W	CEG1	ceg1-ts	-0.01909	-0.346164	-0.02468	-0.463829	-0.00341	-0.138745
YJR107W	YJR107W	yjr107w	0.01575	0.157323	-0.00534	-0.205736	-0.00341	-0.138745
YBR184W	YBR184W	ybr184w	0.01236	0.108333	-0.02348	-0.447815	-0.0034	-0.138618
YOR257W	CDC31	cdc31-5	0.05236	0.686389	0.05661	0.620991	-0.00339	-0.138492
YKL052C	ASK1	ask1-3	0.01233	0.107899	-0.07464	-1.13055	-0.00338	-0.138365
YIR038C	GTT1	gtt1	0.01119	0.0914249	0.02779	0.236386	-0.00338	-0.138365
YDR506C	GMC1	gmc1	-0.02363	-0.411773	-0.0033	-0.178512	-0.00337	-0.138239
YBR158W	AMN1	amn1	-0.00973	-0.210899	-0.03085	-0.546168	-0.00334	-0.137859
YNL045W	LAP2	lap2	-0.01293	-0.257143	-0.01376	-0.318101	-0.00334	-0.137859
YCL014W	BUD3	bud3	0.02009	0.220042	0.01784	0.103603	-0.00334	-0.137859
YPL046C	ELC1	elc1	0.80007	11.4919	0.04664	0.487941	-0.00329	-0.137227
YBL095W	YBL095W	ybl095w	-0.01316	-0.260467	0.00397	-0.0814933	-0.00328	-0.1371
YHL008C	YHL008C	yhl008c	0.00854	0.0531286	-0.03555	-0.60889	-0.00325	-0.136721
YGR066C	YGR066C	ygr066c	-0.04323	-0.695021	-0.00593	-0.213609	-0.00325	-0.136721
YLR406C	RPL31B	rpl31b	0.00118	-0.0532337	0.02407	0.186742	-0.00324	-0.136594
YIL039W	TED1	ted1	-0.02325	-0.406282	-0.11335	-1.64714	-0.00313	-0.135203
YKL205W	LOS1	los1	-0.00327	-0.117542	0.00617	-0.0521342	-0.00313	-0.135203
YDL025C	RTK1	rtk1	0.02273	0.258194	0.08308	0.974235	-0.00311	-0.13495
YHR059W	FYV4	fyv4	0.20732	2.92578	0.19469	2.46368	-0.00309	-0.134697
YML010C	YML010C	yml010c-b	-0.01573	-0.297607	0.03973	0.395726	-0.00308	-0.13457
YOL045W	PSK2	psk2	-0.00283	-0.111184	0.06764	0.768187	-0.00307	-0.134444
YBL040C	ERD2	erd2-ph	-0.01167	-0.238934	-0.0346	-0.596212	-0.00306	-0.134317
YOR213C	SAS5	sas5	-0.01468	-0.282433	-0.00457	-0.19546	-0.00305	-0.134191
YLR206W	ENT2	ent2	-0.00286	-0.111617	-0.02067	-0.410316	-0.00302	-0.133811
YMR006C	PLB2	plb2	-0.0109	-0.227807	0.00301	-0.0943046	-0.003	-0.133558
YGR021W	YGR021W	ygr021w	-0.06171	-0.962083	0.00458	-0.0733528	-0.00295	-0.132926
YLR085C	ARP6	arp6	-0.00333	-0.11841	-0.05887	-0.920097	-0.00293	-0.132673
YBR285W	YBR285W	ybr285w	0.00508	0.00312676	0.02184	0.156983	-0.00292	-0.132546
YMR152W	YIM1	yim1	0.03335	0.411668	-0.04705	-0.762358	-0.00289	-0.132167
YMR111C	YMR111C	ymr111c	0.09159	1.25332	-0.02704	-0.495324	-0.00289	-0.132167
YJL188C	YJL188C	yjl188c	-0.02394	-0.416253	0.04423	0.455779	-0.00288	-0.13204
YJL214W	HXT8	hxt8	0.02143	0.239407	0.01174	0.0221978	-0.00286	-0.131787
YFL021W	GAT1	gat1	0.01102	0.0889681	0.04423	0.455779	-0.00284	-0.131534
YKR098C	UBP11	ubp11	-0.0211	-0.375211	-0.03253	-0.568588	-0.0028	-0.131028
YHR204W	MNL1	mnl1	0.01142	0.0947487	0.01242	0.0312725	-0.00278	-0.130775
YKR100C	SKG1	skg1	-0.00658	-0.165377	0.02084	0.143638	-0.00278	-0.130775
YGR172C	YIP1	yip1-4	-0.01128	-0.233298	0.0608	0.676907	-0.00278	-0.130775
YOR259C	RPT4	rpt4-150	-0.00637	-0.162342	-0.02474	-0.46463	-0.00275	-0.130396
YNL038W	GPI15	gpi15-ph	0.00248	-0.0344469	-0.01124	-0.284472	-0.00274	-0.130269
YJL191W	RPS14B	rps14b	0.00645	0.0229252	0.02492	0.198086	-0.00274	-0.130269
YDL197C	ASF2	asf2	-0.01528	-0.291104	-0.01333	-0.312363	-0.00273	-0.130143
YFL027C	GYP8	gyp8	0.01574	0.157179	-0.03286	-0.572992	-0.00271	-0.12989
YGR259C	YGR259C	ygr259c	0.00535	0.00702864	-0.0689	-1.05395	-0.00269	-0.129637
YGL254W	FZF1	fzf1	-0.05076	-0.80384	-0.03403	-0.588606	-0.00269	-0.129637
YDL048C	STP4	stp4	-0.01459	-0.281132	0.0139	0.0510232	-0.00268	-0.12951
YKL102C	YKL102C	ykl102c	0.01141	0.0946042	0.01605	0.0797151	-0.00268	-0.12951
YLR026C	SED5	sed5-1	-0.03551	-0.583456	-0.07735	-1.16671	-0.00264	-0.129004
YJL038C	LOH1	loh1	0.00165	-0.0464416	-0.00374	-0.184384	-0.00262	-0.128751
YAR029W	YAR029W	yar029w	-0.00511	-0.144133	-0.03717	-0.630509	-0.0026	-0.128498
YBL098W	BNA4	bna4	0.00449	-0.00539957	-0.01952	-0.394969	-0.0026	-0.128498
YHR108W	GGA2	gga2	-0.00233	-0.103958	-0.00816	-0.243369	-0.0026	-0.128498
YLR432W	IMD3	imd3	-0.00835	-0.190956	-0.01993	-0.40044	-0.00259	-0.128372
YDR517W	GRH1	grh1	0.01487	0.144606	-0.00077	-0.144749	-0.00256	-0.127992
YBL013W	FMT1	fmt1	-0.0094	-0.20613	-0.06512	-1.0035	-0.00252	-0.127486
YLL031C	GPI13	gpi13-3	0.0504	0.658065	0.03151	0.28603	-0.00251	-0.12736
YNR047W	FPK1	fpk1	-0.02353	-0.410328	-0.03385	-0.586204	-0.00243	-0.126348
YBL076C	ILS1	ils1-1	-0.0517	-0.817424	0.04498	0.465788	-0.00243	-0.126348
YBL091C	MAP2	map2	0.00116	-0.0535228	-0.00996	-0.26739	-0.00239	-0.125842
YKL188C	PXA2	pxa2	-0.02168	-0.383593	0.01491	0.0645017	-0.00239	-0.125842
YOR122C	PFY1	pfy1-4	0.0013	-0.0514996	0.04823	0.509159	-0.00239	-0.125842
YGL090W	LIF1	lif1	-0.09714	-1.4741	-0.09612	-1.4172	-0.00236	-0.125462
YBR007C	DSF2	dsf2	-0.00813	-0.187776	0.01988	0.130827	-0.00235	-0.125336
YJL025W	RRN7	rrn7-ph	0.00261	-0.0325682	-0.04121	-0.684423	-0.00233	-0.125083
YPR039W	YPR039W	ypr039w	0.02046	0.225389	-0.02061	-0.409515	-0.00233	-0.125083
YKL215C	OXP1	oxp1	-0.00305	-0.114363	-0.02001	-0.401508	-0.00232	-0.124956
YAL011W	SWC3	swc3	-0.063	-0.980725	-0.094255	-1.39231	-0.0023	-0.124703
YDL231C	BRE4	bre4	0.00973	0.0703258	-0.06794	-1.04114	-0.0023	-0.124703
YBR278W	DPB3	dpb3	-0.02074	-0.370009	-0.00796	-0.2407	-0.00229	-0.124577
YDR247W	VHS1	vhs1	-0.00568	-0.15237	0.0618	0.690252	-0.00228	-0.12445
YDR265W	PEX10	pex10	0.00174	-0.0451409	0.05663	0.621258	-0.00227	-0.124324
YNL064C	YDJ1	ydj1	0.080975	1.09992	-0.035335	-0.606021	-0.00226	-0.124197
YBR216C	YBP1	ybp1	-0.00368	-0.123468	-0.01615	-0.349996	-0.00225	-0.124071
YLR422W	YLR422W	ylr422w	-0.00539	-0.148179	0.03136	0.284028	-0.00224	-0.123944
YGL027C	CWH41	cwh41	-0.00692	-0.17029	0.01663	0.0874552	-0.00219	-0.123312
YCR021C	HSP30	hsp30	-0.01983	-0.356858	0.01762	0.100667	-0.00217	-0.123059
YLR092W	SUL2	sul2	-0.00123	-0.0880616	0.02238	0.164189	-0.00217	-0.123059
YJR020W	YJR020W	yjr020w	-0.01996	-0.358736	-0.02807	-0.509069	-0.00216	-0.122932
YBR164C	ARL1	arl1	-0.01514	-0.289081	0.001445	-0.11519	-0.00214	-0.122679
YDR119W	VBA4	vba4	-0.004	-0.128092	0.01066	0.00778517	-0.0021	-0.122173
YPR085C	YPR085C	ypr085c-ph	0.05701	0.753588	0.03453	0.326332	-0.0021	-0.122173
YMR126C	DLT1	dlt1	0.0615	0.818475	0.11842	1.44585	-0.0021	-0.122173
YDR421W	ARO80	aro80	0.00288	-0.0286663	-0.04731	-0.765828	-0.00209	-0.122047
YLR352W	YLR352W	ylr352w	-0.00463	-0.137196	-0.03401	-0.588339	-0.00209	-0.122047
YJL206C	YJL206C	yjl206c	-0.01029	-0.218991	-0.02243	-0.433803	-0.00209	-0.122047
YGL231C	EMC4	emc4	0.02837	0.3397	-0.02388	-0.453153	-0.00208	-0.12192
YIL066C	RNR3	rnr3	0.01363	0.126686	-0.06185	-0.959865	-0.00207	-0.121794
[truncated: 2,629 more rows]

## Sheet: Table S4. rnr1Y285A x DMA
Table S4. rnr1Y285A x deletion mutant array raw SGA data
Query ORF	Query Name	Array ORF	Array Name	Normalized colony size (rnr1Y285A)	Normalized colony std. dev. (rnr1Y285A)	Normalized colony size (ura3∆)	Normalized colony std. dev. (ura3∆)	Score (epsilon)	Score stdev	p-Value
YER070W	rnr1Y285A	YOL090W	MSH2	0.37535	0.068	0.86075	0.037	-0.47896	0.068	0.00161
YER070W	rnr1Y285A	YDR097C	MSH6	0.4626	0.048	0.90532	0.056	-0.44544	0.048	0.00031
YER070W	rnr1Y285A	YCR009C	RVS161	0.27069	0.043	0.68278	0.108	-0.40514	0.043	0.0084
YER070W	rnr1Y285A	YNL082W	PMS1	0.44714	0.025	0.851	0.009	-0.40255	0.025	5e-05
YER070W	rnr1Y285A	YMR167W	MLH1	0.5847	0.021	0.92674	0.004	-0.34334	0.021	1e-05
YER070W	rnr1Y285A	YLR279W	YLR279W	0.74079	0.069	1.063	0.01	-0.32299	0.069	0.00022
YER070W	rnr1Y285A	YMR251W-A	HOR7	0.59686	0.002	0.92012	0.009	-0.31851	0.002	0
YER070W	rnr1Y285A	YLR418C	CDC73	0.37463	0.039	0.69164	0.019	-0.31227	0.039	0.00351
YER070W	rnr1Y285A	YHR184W	SSP1	0.75893	0.129	1.06546	0.029	-0.3122	0.129	0.00132
YER070W	rnr1Y285A	YDR080W	VPS41	0.29708	0.079	0.68114	0.576	-0.29479	0.079	0.00482
YER070W	rnr1Y285A	YMR166C	YMR166C	0.59504	0.028	0.8793	0.056	-0.29419	0.028	0.00073
YER070W	rnr1Y285A	YDL173W	PAR32	0.65718	0.047	0.93358	0.012	-0.27126	0.047	0.0001
YER070W	rnr1Y285A	YDL122W	UBP1	0.66777	0.025	0.92455	0.053	-0.26733	0.025	0.00045
YER070W	rnr1Y285A	YHL036W	MUP3	0.4358	0.064	0.70846	0.175	-0.25359	0.064	0.00084
YER070W	rnr1Y285A	YOR033C	EXO1	0.771	0.024	1.02972	0.009	-0.25313	0.024	1e-05
YER070W	rnr1Y285A	YLR410W	VIP1	0.58211	0.076	0.80003	0.083	-0.24351	0.076	0.0006
YER070W	rnr1Y285A	YCL060C	YCL060C	0.70394	0.007	0.9459	0.009	-0.24171	0.007	0
YER070W	rnr1Y285A	YMR129W	POM152	0.84224	0.045	1.06976	0.022	-0.22922	0.045	4e-05
YER070W	rnr1Y285A	YML035C	AMD1	0.80706	0.02	1.02569	0.029	-0.22279	0.02	0
YER070W	rnr1Y285A	YLR049C	YLR049C	0.85266	0.134	1.06636	0.029	-0.21522	0.134	0.00104
YER070W	rnr1Y285A	YLR193C	UPS1	0.65677	0.035	0.84541	0.078	-0.21371	0.035	0.00097
YER070W	rnr1Y285A	YOR275C	RIM20	0.55607	0.02	0.77061	0.031	-0.2072	0.02	0.00043
YER070W	rnr1Y285A	YCR024C-A	PMP1	0.78219	0.138	0.98842	0.019	-0.20706	0.138	0.00148
YER070W	rnr1Y285A	YGL046W	YGL046W	0.7128	0.008	0.90267	0.028	-0.19334	0.008	4e-05
YER070W	rnr1Y285A	YGR284C	ERV29	0.82238	0.009	1.0176	0.008	-0.19297	0.009	4e-05
YER070W	rnr1Y285A	YDR251W	PAM1	0.86783	0.033	1.06629	0.027	-0.19263	0.033	2e-05
YER070W	rnr1Y285A	YOR082C	YOR082C	0.69939	0.09	0.87944	0.022	-0.18811	0.09	0.00057
YER070W	rnr1Y285A	YMR048W	CSM3	0.81601	0.017	1.0041	0.025	-0.18304	0.017	0
YER070W	rnr1Y285A	YDL070W	BDF2	0.78866	0.113	0.98493	0.039	-0.18092	0.113	0.00079
YER070W	rnr1Y285A	YMR017W	SPO20	0.87247	0.008	1.05038	0.03	-0.17843	0.008	3e-05
YER070W	rnr1Y285A	YDR049W	VMS1	0.8149	0.059	0.99083	0.017	-0.17751	0.059	0.00011
YER070W	rnr1Y285A	YDR423C	CAD1	0.87112	0.077	1.05368	0.013	-0.17696	0.077	0.00019
YER070W	rnr1Y285A	YLR130C	ZRT2	0.86775	0.245	1.02804	0.018	-0.16521	0.245	0.00581
YER070W	rnr1Y285A	YLR337C	VRP1	0.33415	0.045	0.45794	0.173	-0.16515	0.045	0.00606
YER070W	rnr1Y285A	YDL038C	YDL038C	0.87565	0.059	1.03686	0.02	-0.16367	0.059	0.0015
YER070W	rnr1Y285A	YGL101W	YGL101W	0.81572	0.034	0.96885	0.016	-0.16272	0.034	2e-05
YER070W	rnr1Y285A	YPR030W	CSR2	0.79404	0.112	0.96542	0.025	-0.16183	0.112	0.00076
YER070W	rnr1Y285A	YBL031W	SHE1	0.40547	0.101	0.58202	0.046	-0.16167	0.101	0.00401
YER070W	rnr1Y285A	YOR175C	ALE1	0.8441	0.019	1.00275	0.004	-0.15953	0.019	0
YER070W	rnr1Y285A	YDR315C	IPK1	0.64441	0.026	0.79735	0.002	-0.15467	0.026	2e-05
YER070W	rnr1Y285A	YDL006W	PTC1	0.28147	0.027	0.43723	0.043	-0.1487	0.027	0.00025
YER070W	rnr1Y285A	YOL141W	PPM2	0.89007	0.038	1.00594	0.104	-0.14796	0.038	0.00062
YER070W	rnr1Y285A	YDL157C	YDL157C	0.82914	0.143	0.97803	0.004	-0.14768	0.143	0.00138
YER070W	rnr1Y285A	YJR080C	AIM24	0.85678	0.073	1.00105	0.017	-0.14736	0.073	0.00017
YER070W	rnr1Y285A	YHR191C	CTF8	0.78946	0.032	0.93377	0.006	-0.14502	0.032	2e-05
YER070W	rnr1Y285A	YGR260W	TNA1	0.84021	0.02	0.98209	0.013	-0.14022	0.02	0
YER070W	rnr1Y285A	YPR024W	YME1	0.53837	0.004	0.68017	0.015	-0.13968	0.004	2e-05
YER070W	rnr1Y285A	YDL172C	YDL172C	0.83473	0.003	0.97067	0.018	-0.13688	0.003	0
YER070W	rnr1Y285A	YMR063W	RIM9	0.70939	0.019	0.85032	0.033	-0.13559	0.019	0
YER070W	rnr1Y285A	YDR276C	PMP3	0.57725	0.047	0.70469	0.027	-0.13442	0.047	0.00015
YER070W	rnr1Y285A	YDL179W	PCL9	0.91672	0.158	1.03814	0.063	-0.13308	0.158	0.00137
YER070W	rnr1Y285A	YNL121C	TOM70	0.79801	0.067	0.91723	0.097	-0.13157	0.066	0.00016
YER070W	rnr1Y285A	YGL222C	EDC1	0.74755	0.039	0.88108	0.006	-0.13111	0.039	4e-05
YER070W	rnr1Y285A	YDR219C	MFB1	0.789	0.105	0.92031	0.038	-0.12967	0.105	0.00064
YER070W	rnr1Y285A	YJL028W	YJL028W	0.88246	0.027	1.0207	0.04	-0.12926	0.027	0.00031
YER070W	rnr1Y285A	YJR069C	HAM1	0.92808	0.046	1.06191	0.017	-0.12879	0.046	3e-05
YER070W	rnr1Y285A	YNL010W	YNL010W	0.88526	0.122	0.99669	0.086	-0.12825	0.122	0.0007
YER070W	rnr1Y285A	YGR173W	RBG2	0.70087	0.038	0.82904	0.055	-0.128	0.038	5e-05
YER070W	rnr1Y285A	YGR237C	YGR237C	0.78171	0.079	0.9126	0.033	-0.12748	0.079	0.00028
YER070W	rnr1Y285A	YLR395C	COX8	0.96963	0.024	1.09449	0.013	-0.12742	0.024	0
YER070W	rnr1Y285A	YNL004W	HRB1	1.02817	0.018	1.15709	0.007	-0.12591	0.018	0
YER070W	rnr1Y285A	YCR092C	MSH3	0.90009	0.019	1.02423	0.002	-0.12386	0.019	0.00014
YER070W	rnr1Y285A	YGR163W	GTR2	0.83697	0.109	0.95942	0.028	-0.12369	0.109	0.00061
YER070W	rnr1Y285A	YCR053W	THR4	0.46523	0.013	0.59317	0.039	-0.12354	0.013	0.00027
YER070W	rnr1Y285A	YLR169W	YLR169W	0.90975	0.086	1.03804	0.039	-0.12254	0.086	0.00023
YER070W	rnr1Y285A	YDL002C	NHP10	0.59619	0.008	0.71146	0.04	-0.12227	0.008	5e-05
YER070W	rnr1Y285A	YJR077C	MIR1	0.55971	0.146	0.71919	0.252	-0.11835	0.146	0.00458
YER070W	rnr1Y285A	YLR059C	REX2	0.81618	0.012	0.93707	0.03	-0.11699	0.012	8e-05
YER070W	rnr1Y285A	YKL053C-A	MDM35	0.79985	0.07	0.90828	0.087	-0.11689	0.07	0.00018
YER070W	rnr1Y285A	YFR007W	YFH7	0.88901	0.124	1.00461	0.016	-0.11667	0.124	0.00073
YER070W	rnr1Y285A	YFR030W	MET10	0.91372	0.011	1.03041	0.004	-0.11627	0.01	0
YER070W	rnr1Y285A	YGR181W	TIM13	0.85962	0.137	0.98398	0.025	-0.11535	0.137	0.00108
YER070W	rnr1Y285A	YKL051W	SFK1	0.8155	0.233	0.89252	0.185	-0.11424	0.233	0.006
YER070W	rnr1Y285A	YIL039W	TED1	0.90207	0.014	1.00189	0.035	-0.11335	0.014	8e-05
YER070W	rnr1Y285A	YOR191W	ULS1	0.86123	0.013	0.96964	0.03	-0.11246	0.013	8e-05
YER070W	rnr1Y285A	YFL020C	PAU5	0.90759	0.073	1.01681	0.015	-0.11245	0.073	0.00014
YER070W	rnr1Y285A	YKL043W	PHD1	1.00244	0.013	1.11552	0.012	-0.11127	0.013	0
YER070W	rnr1Y285A	YPL144W	POC4	0.78083	0.074	0.88771	0.007	-0.10849	0.074	0.00023
YER070W	rnr1Y285A	YJL044C	GYP6	0.96164	0.145	1.06711	0.017	-0.10839	0.145	0.00093
YER070W	rnr1Y285A	YPR001W	CIT3	0.88006	0.087	0.98594	0.012	-0.1082	0.087	0.00027
YER070W	rnr1Y285A	YBL021C	HAP3	0.73066	0.028	0.82598	0.043	-0.10765	0.028	0.0005
YER070W	rnr1Y285A	YMR154C	RIM13	0.84759	0.015	0.95428	0.021	-0.10759	0.015	0
YER070W	rnr1Y285A	YHR086W	NAM8	0.98651	0.035	1.09495	0.004	-0.10701	0.035	1e-05
YER070W	rnr1Y285A	YDR388W	RVS167	0.48762	0.091	0.59052	0.017	-0.1062	0.091	0.00173
YER070W	rnr1Y285A	YIL154C	IMP2'	0.79599	0.015	0.89929	0.012	-0.10431	0.015	0.00012
YER070W	rnr1Y285A	YHR067W	HTD2	0.62156	0.11	0.73869	0.039	-0.10398	0.11	0.00148
YER070W	rnr1Y285A	YDR491C	YDR491C	0.92555	0.037	1.02817	0.031	-0.10398	0.037	2e-05
YER070W	rnr1Y285A	YLR315W	NKP2	0.7591	0.009	0.85852	0.023	-0.10354	0.009	5e-05
YER070W	rnr1Y285A	YOR099W	KTR1	0.91843	0.046	1.01051	0.049	-0.10301	0.046	4e-05
YER070W	rnr1Y285A	YFL034W	YFL034W	0.94376	0.052	1.0493	0.024	-0.10255	0.052	5e-05
YER070W	rnr1Y285A	YGL196W	DSD1	0.62615	0.069	0.63205	0.292	-0.10185	0.069	0.00401
YER070W	rnr1Y285A	YNL122C	YNL122C	0.80478	0.022	0.91664	0.093	-0.1014	0.022	0.00025
YER070W	rnr1Y285A	YOR083W	WHI5	0.87452	0.029	0.96995	0.027	-0.1	0.029	0.00037
YER070W	rnr1Y285A	YDL128W	VCX1	0.81261	0.151	0.92977	0.061	-0.09985	0.151	0.00171
YER070W	rnr1Y285A	YDR358W	GGA1	0.77145	0.053	0.84731	0.123	-0.09948	0.053	9e-05
YER070W	rnr1Y285A	YLR119W	SRN2	0.83045	0.054	0.94103	0.025	-0.09922	0.054	8e-05
YER070W	rnr1Y285A	YCL061C	MRC1	0.77976	0.026	0.87547	0.014	-0.09751	0.026	1e-05
YER070W	rnr1Y285A	YIR002C	MPH1	0.87036	0.036	0.96042	0.03	-0.09733	0.036	2e-05
YER070W	rnr1Y285A	YHR078W	YHR078W	1.07578	0.024	1.17299	0.008	-0.09722	0.024	0
YER070W	rnr1Y285A	YKL131W	YKL131W	0.89065	0.011	0.98508	0.008	-0.09702	0.011	5e-05
YER070W	rnr1Y285A	YGL090W	LIF1	0.91386	0.002	1.01553	0.024	-0.09612	0.002	0
YER070W	rnr1Y285A	YDR134C	YDR134C	0.97271	0.064	1.0655	0.005	-0.09599	0.064	8e-05
YER070W	rnr1Y285A	YDL149W	ATG9	0.84571	0.023	0.9369	0.029	-0.09591	0.023	1e-05
YER070W	rnr1Y285A	YLR385C	SWC7	0.83352	0.092	0.92866	0.008	-0.09578	0.092	0.00037
YER070W	rnr1Y285A	YOR047C	STD1	0.93688	0.014	1.02725	0.029	-0.09537	0.014	8e-05
YER070W	rnr1Y285A	YOR344C	TYE7	0.92928	0.009	1.02166	0.017	-0.09531	0.009	0
YER070W	rnr1Y285A	YLR231C	BNA5	0.93185	0.015	1.03015	0.025	-0.09529	0.015	8e-05
YER070W	rnr1Y285A	YML056C	IMD4	0.88945	0.014	0.98406	0.002	-0.09503	0.014	0
YER070W	rnr1Y285A	YGL087C	MMS2	1.01707	0.011	1.11448	0.028	-0.09502	0.011	0
YER070W	rnr1Y285A	YAL042W	ERV46	0.90872	0.049	0.99811	0.023	-0.09493	0.049	4e-05
YER070W	rnr1Y285A	YJR110W	YMR1	0.98456	0.015	1.07551	0.017	-0.09482	0.015	0
YER070W	rnr1Y285A	YKR065C	PAM17	0.78427	0.021	0.85937	0.114	-0.09476	0.021	0.00025
YER070W	rnr1Y285A	YJL165C	HAL5	0.8479	0.026	0.94402	0.027	-0.09452	0.026	1e-05
YER070W	rnr1Y285A	YER183C	FAU1	0.96113	0.046	1.05368	0.02	-0.09281	0.046	3e-05
YER070W	rnr1Y285A	YBL069W	AST1	0.92373	0.059	1.01714	0.008	-0.09219	0.059	7e-05
YER070W	rnr1Y285A	YDL216C	RRI1	0.92167	0.028	1.00985	0.026	-0.09175	0.028	1e-05
YER070W	rnr1Y285A	YDL118W	YDL118W	0.82906	0.003	0.91787	0.015	-0.09145	0.003	0
YER070W	rnr1Y285A	YBL051C	PIN4	0.86514	0.033	0.96066	0.021	-0.09137	0.033	2e-05
YER070W	rnr1Y285A	YDL161W	ENT1	0.92792	0.088	1.02046	0.068	-0.08976	0.088	0.00023
YER070W	rnr1Y285A	YOR368W	RAD17	0.82818	0.022	0.90533	0.089	-0.08972	0.022	0
YER070W	rnr1Y285A	YMR294W-A	YMR294W-A	0.63301	0.019	0.72237	0.002	-0.08938	0.019	1e-05
YER070W	rnr1Y285A	YER173W	RAD24	0.95478	0.014	1.0447	0.007	-0.08936	0.014	0
YER070W	rnr1Y285A	YMR262W	YMR262W	0.90286	0.034	0.99534	0.012	-0.08931	0.034	1e-05
YER070W	rnr1Y285A	YKL046C	DCW1	0.92268	0.02	1.01499	0.017	-0.08929	0.02	0
YER070W	rnr1Y285A	YLL056C	YLL056C	0.97596	0.021	1.06606	0.005	-0.08923	0.021	0
YER070W	rnr1Y285A	YMR037C	MSN2	0.92375	0.034	1.00858	0.022	-0.08899	0.034	1e-05
YER070W	rnr1Y285A	YDL189W	RBS1	0.95502	0.023	1.04266	0.021	-0.08868	0.023	0
YER070W	rnr1Y285A	YKL091C	YKL091C	0.97835	0.013	1.0665	0.006	-0.08713	0.013	0
YER070W	rnr1Y285A	YHR132W-A	IGO2	0.98012	0.045	1.06289	0.014	-0.08641	0.045	3e-05
YER070W	rnr1Y285A	YPL048W	CAM1	0.41945	0.067	0.51668	0.081	-0.08577	0.067	0.00109
YER070W	rnr1Y285A	YMR297W	PRC1	1.03984	0.017	1.12484	0.041	-0.08567	0.017	0
YER070W	rnr1Y285A	YBR165W	UBS1	0.73365	0.011	0.81799	0.01	-0.08564	0.011	8e-05
YER070W	rnr1Y285A	YDL162C	YDL162C	0.88047	0.11	0.96444	0.024	-0.08531	0.11	0.00053
YER070W	rnr1Y285A	YNL044W	YIP3	0.90113	0.021	0.983	0.016	-0.0853	0.021	0
YER070W	rnr1Y285A	YDL243C	AAD4	0.69948	0.006	0.68442	0.316	-0.08529	0.006	3e-05
YER070W	rnr1Y285A	YPR160W	GPH1	0.94981	0.08	1.03052	0.027	-0.08404	0.08	0.00016
YER070W	rnr1Y285A	YOR054C	VHS3	0.87121	0.022	0.95491	0.016	-0.08353	0.022	0
YER070W	rnr1Y285A	YJL043W	YJL043W	0.9973	0.028	1.07656	0.006	-0.08239	0.028	1e-05
YER070W	rnr1Y285A	YOR356W	CIR2	0.94946	0.037	1.03722	0.018	-0.08233	0.037	2e-05
YER070W	rnr1Y285A	YOL137W	BSC6	0.93602	0.036	1.02252	0.026	-0.08223	0.036	0.0005
YER070W	rnr1Y285A	YMR222C	FSH2	0.74601	0.034	0.82295	0.01	-0.08178	0.034	3e-05
YER070W	rnr1Y285A	YNL066W	SUN4	1.00096	0.022	1.0787	0.042	-0.08164	0.022	0
YER070W	rnr1Y285A	YDR372C	VPS74	0.9132	0.071	0.99853	0.022	-0.08134	0.071	0.00013
YER070W	rnr1Y285A	YBR238C	YBR238C	0.82435	0.172	0.87541	0.164	-0.08131	0.172	0.00239
YER070W	rnr1Y285A	YDL112W	TRM3	0.91432	0.034	0.99706	0.032	-0.08094	0.034	1e-05
YER070W	rnr1Y285A	YLL047W	YLL047W	0.92268	0.022	1.0028	0.029	-0.0809	0.022	0
YER070W	rnr1Y285A	YGR100W	MDR1	0.91041	0.001	0.98386	0.02	-0.08072	0.001	0
YER070W	rnr1Y285A	YLR194C	YLR194C	0.94175	0.143	1.0268	0.028	-0.08069	0.143	0.00095
YER070W	rnr1Y285A	YOR104W	PIN2	0.89234	0.053	0.9747	0.014	-0.08063	0.053	6e-05
YER070W	rnr1Y285A	YLR393W	ATP10	0.87091	0.008	0.94664	0.009	-0.08035	0.008	3e-05
YER070W	rnr1Y285A	YJL172W	CPS1	0.93922	0.031	1.01827	0.002	-0.07966	0.031	1e-05
YER070W	rnr1Y285A	YDR420W	HKR1	0.94964	0.039	1.03624	0.016	-0.07961	0.039	2e-05
YER070W	rnr1Y285A	YGL151W	NUT1	0.87991	0.015	0.95339	0.02	-0.07945	0.015	0
YER070W	rnr1Y285A	YOR109W	INP53	0.86057	0.01	0.94166	0.005	-0.07938	0.01	0
YER070W	rnr1Y285A	YCR011C	ADP1	0.97403	0.013	1.05093	0.005	-0.07903	0.013	6e-05
YER070W	rnr1Y285A	YDR217C	RAD9	0.89065	0.02	0.96968	0.005	-0.07864	0.02	0
YER070W	rnr1Y285A	YAR015W	ADE1	0.89608	0.019	0.97665	0.013	-0.0779	0.019	0
YER070W	rnr1Y285A	YLR413W	YLR413W	1.01128	0.012	1.07588	0.025	-0.07787	0.012	5e-05
YER070W	rnr1Y285A	YOL025W	LAG2	0.91554	0.008	0.99411	0.008	-0.07766	0.008	0
YER070W	rnr1Y285A	YKL221W	MCH2	0.97327	0.009	1.04257	0.023	-0.07762	0.009	0
YER070W	rnr1Y285A	YDR011W	SNQ2	0.93703	0.024	0.99921	0.048	-0.07744	0.024	0
YER070W	rnr1Y285A	YKL156W	RPS27A	0.99732	0.027	1.07384	0.007	-0.07713	0.027	1e-05
YER070W	rnr1Y285A	YDL113C	ATG20	0.92168	0.028	0.99795	0.009	-0.07703	0.028	1e-05
YER070W	rnr1Y285A	YJL206C-A	YJL206C-A	0.64691	0.038	0.72947	0.069	-0.07573	0.038	6e-05
YER070W	rnr1Y285A	YCL016C	DCC1	0.84888	0.027	0.89727	0.049	-0.07552	0.027	0.00033
YER070W	rnr1Y285A	YHR158C	KEL1	0.90842	0.023	1.00759	0.094	-0.0746	0.023	0.00021
YER070W	rnr1Y285A	YGR238C	KEL2	0.94493	0.067	1.02599	0.031	-0.07456	0.067	0.0001
YER070W	rnr1Y285A	YOL027C	MDM38	0.96588	0.021	1.03978	0.013	-0.07456	0.021	0
YER070W	rnr1Y285A	YGL168W	HUR1	0.65465	0.01	0.73125	0.012	-0.0745	0.01	0
YER070W	rnr1Y285A	YHR157W	REC104	0.92383	0.07	0.97368	0.078	-0.07447	0.07	0.00012
YER070W	rnr1Y285A	YDL134C	PPH21	0.95045	0.006	1.02412	0.009	-0.07429	0.006	1e-05
YER070W	rnr1Y285A	YIL058W	YIL058W	0.93598	0.011	1.01334	0.019	-0.07425	0.011	4e-05
YER070W	rnr1Y285A	YGL139W	FLC3	0.91548	0.057	0.98789	0.005	-0.07421	0.057	7e-05
YER070W	rnr1Y285A	YGL205W	POX1	0.93343	0.044	1.01142	0.023	-0.07413	0.044	3e-05
YER070W	rnr1Y285A	YKR102W	FLO10	0.98468	0.003	1.05871	0.005	-0.07409	0.003	0
YER070W	rnr1Y285A	YKR055W	RHO4	1.00115	0.004	1.07616	0.014	-0.07375	0.004	1e-05
YER070W	rnr1Y285A	YKR047W	YKR047W	1.01401	0.095	1.1016	0.1	-0.07368	0.094	0.00022
YER070W	rnr1Y285A	YOL029C	YOL029C	0.94025	0.008	1.01498	0.001	-0.07367	0.008	3e-05
YER070W	rnr1Y285A	YLR334C	YLR334C	0.8697	0.078	0.94251	0.03	-0.07356	0.078	0.0002
YER070W	rnr1Y285A	YBR197C	YBR197C	0.92848	0.016	1.00434	0.022	-0.07337	0.016	0
YER070W	rnr1Y285A	YLR108C	YLR108C	0.95701	0.008	1.02515	0.018	-0.07327	0.008	2e-05
YER070W	rnr1Y285A	YHR043C	DOG2	0.93185	0.11	0.99427	0.058	-0.07325	0.11	0.00045
YER070W	rnr1Y285A	YDL222C	FMP45	0.92869	0.042	1.00238	0.016	-0.0731	0.042	3e-05
YER070W	rnr1Y285A	YFL019C	YFL019C	0.97158	0.021	1.04713	0.004	-0.07306	0.021	0
YER070W	rnr1Y285A	YLR311C	YLR311C	0.95213	0.128	1.02569	0.008	-0.07286	0.128	0.00066
YER070W	rnr1Y285A	YPL274W	SAM3	0.91474	0.066	0.98761	0.022	-0.07212	0.065	0.0001
YER070W	rnr1Y285A	YLR200W	YKE2	0.9421	0.077	1.02508	0.059	-0.0721	0.077	0.00015
YER070W	rnr1Y285A	YPL259C	APM1	0.99882	0.024	1.06869	0.027	-0.07182	0.024	0
YER070W	rnr1Y285A	YLR372W	SUR4	0.91268	0.017	0.97463	0.032	-0.0711	0.017	0.00011
YER070W	rnr1Y285A	YLL041C	SDH2	0.80429	0.219	0.82138	0.227	-0.07107	0.219	0.00524
YER070W	rnr1Y285A	YDR056C	YDR056C	0.91786	0.017	0.98348	0.022	-0.07083	0.017	0
YER070W	rnr1Y285A	YBR064W	YBR064W	0.97916	0.034	1.05475	0.025	-0.07069	0.034	1e-05
YER070W	rnr1Y285A	YOL009C	MDM12	0.92321	0.012	0.9932	0.011	-0.07045	0.012	6e-05
YER070W	rnr1Y285A	YPR122W	AXL1	0.9313	0.002	0.99764	0.01	-0.06969	0.002	0
YER070W	rnr1Y285A	YGR068C	ART5	0.98245	0.017	1.05277	0.003	-0.06951	0.017	0
YER070W	rnr1Y285A	YKR013W	PRY2	1.00005	0.006	1.06309	0.014	-0.06933	0.006	1e-05
YER070W	rnr1Y285A	YBL015W	ACH1	0.91832	0.028	0.98671	0.017	-0.06932	0.028	1e-05
YER070W	rnr1Y285A	YBR022W	POA1	0.95106	0.016	1.01614	0.033	-0.06926	0.016	0
YER070W	rnr1Y285A	YOR162C	YRR1	0.95957	0.019	1.02957	0.007	-0.06924	0.019	0
YER070W	rnr1Y285A	YDR006C	SOK1	0.92637	0.035	0.99564	0.003	-0.06923	0.035	2e-05
YER070W	rnr1Y285A	YGR259C	YGR259C	0.87025	0.016	0.93653	0.011	-0.0689	0.016	0
YER070W	rnr1Y285A	YGR032W	GSC2	0.93522	0.018	1.01335	0.031	-0.06883	0.018	0
YER070W	rnr1Y285A	YGR234W	YHB1	0.98395	0.03	1.04598	0.049	-0.06882	0.03	1e-05
YER070W	rnr1Y285A	YPL263C	KEL3	0.94203	0.054	1.00208	0.031	-0.06858	0.054	5e-05
YER070W	rnr1Y285A	YKL114C	APN1	0.95754	0.009	1.02171	0.009	-0.0685	0.009	0
YER070W	rnr1Y285A	YGR038W	ORM1	0.93607	0.016	1.00387	0.001	-0.06831	0.016	0
YER070W	rnr1Y285A	YLL023C	POM33	0.89467	0.011	0.96026	0.015	-0.06827	0.011	0
YER070W	rnr1Y285A	YHR079C-B	YHR079C-B	0.97109	0.03	1.03815	0.012	-0.06826	0.03	1e-05
YER070W	rnr1Y285A	YGL208W	SIP2	0.93744	0.002	1.00595	0.028	-0.06817	0.002	0
YER070W	rnr1Y285A	YHR161C	YAP1801	0.84329	0.03	0.90884	0.01	-0.06802	0.03	0.00042
YER070W	rnr1Y285A	YDL231C	BRE4	0.9113	0.083	0.9829	0.021	-0.06794	0.083	0.00021
YER070W	rnr1Y285A	YOR245C	DGA1	0.61622	0.028	0.68372	0.014	-0.06767	0.028	3e-05
YER070W	rnr1Y285A	YPL171C	OYE3	0.9226	0.012	0.98853	0.031	-0.06749	0.012	5e-05
YER070W	rnr1Y285A	YDL071C	YDL071C	0.98308	0.028	1.05149	0.013	-0.06747	0.028	1e-05
YER070W	rnr1Y285A	YGL167C	PMR1	0.70105	0.021	0.76802	0.009	-0.06743	0.021	1e-05
YER070W	rnr1Y285A	YCR077C	PAT1	0.82625	0.019	0.89656	0.028	-0.0672	0.019	0.00017
YER070W	rnr1Y285A	YDL188C	PPH22	0.92458	0.015	0.99079	0.005	-0.06702	0.015	0
YER070W	rnr1Y285A	YDR382W	RPP2B	0.95011	0.026	1.01498	0.019	-0.06696	0.026	1e-05
YER070W	rnr1Y285A	YJR129C	YJR129C	0.97511	0.016	1.04381	0.031	-0.06694	0.016	0
YER070W	rnr1Y285A	YDR254W	CHL4	0.9863	0.042	1.05004	0.004	-0.06644	0.042	2e-05
YER070W	rnr1Y285A	YHR045W	YHR045W	0.96197	0.04	1.02281	0.048	-0.06631	0.04	2e-05
YER070W	rnr1Y285A	YJR003C	YJR003C	0.7541	0.166	0.83087	0.119	-0.0663	0.166	0.00283
YER070W	rnr1Y285A	YLL043W	FPS1	0.82592	0.095	0.89434	0.005	-0.06615	0.095	0.00041
YER070W	rnr1Y285A	YHR110W	ERP5	0.98586	0.018	1.06009	0.04	-0.0661	0.018	0
YER070W	rnr1Y285A	YCR005C	CIT2	0.9561	0.031	1.02579	0.018	-0.06606	0.031	1e-05
YER070W	rnr1Y285A	YBR084W	MIS1	0.88904	0.028	0.95488	0.007	-0.066	0.028	1e-05
YER070W	rnr1Y285A	YKR028W	SAP190	0.92407	0	0.99091	0.017	-0.06591	0	0
YER070W	rnr1Y285A	YDR092W	UBC13	0.89415	0.009	0.9588	0.01	-0.0659	0.009	0
YER070W	rnr1Y285A	YGL160W	AIM14	0.87282	0.056	0.93103	0.036	-0.06561	0.056	7e-05
YER070W	rnr1Y285A	YOR296W	YOR296W	0.9504	0.024	1.01851	0.013	-0.06542	0.024	0
YER070W	rnr1Y285A	YMR060C	SAM37	0.87902	0.021	0.94434	0.008	-0.06538	0.021	0
YER070W	rnr1Y285A	YBL013W	FMT1	0.95691	0.08	1.02155	0.023	-0.06512	0.08	0.00016
YER070W	rnr1Y285A	YLR246W	ERF2	1.03578	0.024	1.09119	0.017	-0.06497	0.024	0
YER070W	rnr1Y285A	YMR313C	TGL3	0.94781	0.018	1.01158	0.013	-0.0649	0.018	0
YER070W	rnr1Y285A	YLR351C	NIT3	0.94756	0.055	1.01237	0.025	-0.06473	0.055	5e-05
YER070W	rnr1Y285A	YPL015C	HST2	0.93447	0.024	0.99747	0.007	-0.06433	0.024	0
YER070W	rnr1Y285A	YBR227C	MCX1	0.91584	0.018	0.97871	0.011	-0.06401	0.018	0
YER070W	rnr1Y285A	YDR109C	YDR109C	1.02438	0.017	1.08303	0.022	-0.06394	0.017	0
YER070W	rnr1Y285A	YDR102C	YDR102C	0.95935	0.02	1.01965	0.027	-0.06389	0.02	0
YER070W	rnr1Y285A	YGR040W	KSS1	0.92959	0.014	0.99475	0.008	-0.06388	0.014	0
YER070W	rnr1Y285A	YBR073W	RDH54	0.9487	0.028	1.00907	0.025	-0.06369	0.028	1e-05
YER070W	rnr1Y285A	YJR137C	MET5	0.97466	0.022	1.032	0.029	-0.06341	0.022	0
YER070W	rnr1Y285A	YGR236C	SPG1	0.91146	0.02	0.97758	0.016	-0.06335	0.02	0
YER070W	rnr1Y285A	YOR043W	WHI2	0.8893	0.047	0.94357	0.047	-0.06277	0.047	4e-05
YER070W	rnr1Y285A	YBR271W	EFM2	0.9226	0.022	0.97918	0.02	-0.06267	0.022	0
YER070W	rnr1Y285A	YBR292C	YBR292C	0.85029	0.003	0.91523	0.021	-0.06251	0.003	0
YER070W	rnr1Y285A	YAL064C-A	TDA8	0.95629	0.014	1.01797	0.006	-0.06246	0.014	0
YER070W	rnr1Y285A	YJL079C	PRY1	0.99413	0.038	1.05755	0.005	-0.06245	0.038	2e-05
YER070W	rnr1Y285A	YIR031C	DAL7	1.00623	0.01	1.06314	0.029	-0.0623	0.01	0
YER070W	rnr1Y285A	YMR106C	YKU80	0.97716	0.014	1.03727	0.034	-0.06216	0.014	0
YER070W	rnr1Y285A	YDL127W	PCL2	0.86474	0.038	0.93313	0.034	-0.06198	0.038	2e-05
YER070W	rnr1Y285A	YKL128C	PMU1	0.93816	0.011	1.00472	0.027	-0.06196	0.011	0
YER070W	rnr1Y285A	YOR139C	YOR139C	0.82702	0.001	0.89115	0.006	-0.06193	0.001	0
YER070W	rnr1Y285A	YIL066C	RNR3	0.98069	0.024	1.03934	0.025	-0.06185	0.024	0
YER070W	rnr1Y285A	YDR441C	APT2	0.91535	0.039	0.97785	0.025	-0.06165	0.039	2e-05
YER070W	rnr1Y285A	YMR251W	GTO3	1.04915	0.032	1.11488	0.032	-0.06163	0.032	1e-05
YER070W	rnr1Y285A	YJL045W	YJL045W	0.95618	0.047	1.0151	0.008	-0.06157	0.047	3e-05
YER070W	rnr1Y285A	YLL057C	JLP1	0.90261	0.006	0.96408	0.004	-0.06153	0.006	2e-05
YER070W	rnr1Y285A	YMR002W	MIC17	1.04464	0.051	1.1156	0.033	-0.06153	0.05	3e-05
YER070W	rnr1Y285A	YDL110C	TMA17	0.92471	0.013	0.98914	0.013	-0.06131	0.013	0
YER070W	rnr1Y285A	YDR314C	RAD34	0.91743	0.074	0.97122	0.034	-0.06131	0.074	0.00014
YER070W	rnr1Y285A	YHR113W	APE4	0.93861	0.003	0.99917	0.009	-0.0611	0.003	0
YER070W	rnr1Y285A	YPL026C	SKS1	0.90764	0.04	0.96942	0.006	-0.06102	0.04	2e-05
YER070W	rnr1Y285A	YNL086W	SNN1	0.90748	0.024	0.96594	0.014	-0.06052	0.024	1e-05
YER070W	rnr1Y285A	YMR053C	STB2	0.92467	0.014	0.98312	0.027	-0.06049	0.014	0
YER070W	rnr1Y285A	YPR069C	SPE3	0.76964	0.002	0.82987	0.037	-0.06029	0.002	0
YER070W	rnr1Y285A	YPL033C	SRL4	0.94117	0.016	1.00757	0.03	-0.06018	0.016	0
YER070W	rnr1Y285A	YDL024C	DIA3	1.00749	0.029	1.06755	0.003	-0.06014	0.029	1e-05
YER070W	rnr1Y285A	YOR328W	PDR10	0.93899	0.028	1.00064	0.023	-0.06014	0.028	1e-05
YER070W	rnr1Y285A	YDL131W	LYS21	0.8935	0.014	0.95308	0.011	-0.05995	0.014	0
YER070W	rnr1Y285A	YNR028W	CPR8	0.96947	0.005	1.0279	0.019	-0.05993	0.005	1e-05
YER070W	rnr1Y285A	YLR392C	ART10	0.95176	0.023	1.00805	0.021	-0.05985	0.023	0
YER070W	rnr1Y285A	YOR253W	NAT5	0.93288	0.009	0.99264	0.031	-0.05985	0.009	3e-05
YER070W	rnr1Y285A	YPR070W	MED1	0.66343	0.047	0.72313	0.003	-0.05975	0.047	0.0001
YER070W	rnr1Y285A	YJL029C	VPS53	0.3524	0.063	0.40386	0.061	-0.0596	0.063	0.00155
YER070W	rnr1Y285A	YNL064C	YDJ1	0.60695	0.027	0.66695	0.007	-0.05958	0.027	2e-05
YER070W	rnr1Y285A	YAR027W	UIP3	0.92655	0.006	0.98853	0.01	-0.05951	0.006	1e-05
YER070W	rnr1Y285A	YDL054C	MCH1	0.91288	0.016	0.96779	0.026	-0.05934	0.016	0.00011
YER070W	rnr1Y285A	YKL040C	NFU1	0.95075	0.019	1.00416	0.019	-0.05913	0.019	0
YER070W	rnr1Y285A	YOR003W	YSP3	0.98949	0.005	1.04576	0.014	-0.05889	0.005	1e-05
YER070W	rnr1Y285A	YLR131C	ACE2	0.87285	0.002	0.9379	0.039	-0.05888	0.002	0
YER070W	rnr1Y285A	YLR085C	ARP6	0.90613	0.04	0.96675	0.026	-0.05887	0.04	2e-05
YER070W	rnr1Y285A	YIL015C-A	YIL015C-A	0.96361	0.019	1.02329	0.003	-0.05883	0.019	0
YER070W	rnr1Y285A	YAL061W	BDH2	1.0137	0.017	1.0772	0.029	-0.0588	0.017	0
YER070W	rnr1Y285A	YOL085C	YOL085C	0.99681	0.038	1.05106	0.026	-0.05877	0.038	2e-05
YER070W	rnr1Y285A	YIR001C	SGN1	0.90449	0.025	0.96055	0.024	-0.05874	0.025	1e-05
YER070W	rnr1Y285A	YJR130C	STR2	0.95107	0.013	1.00827	0.012	-0.05838	0.013	0
YER070W	rnr1Y285A	YKL159C	RCN1	1.06242	0.006	1.12089	0.003	-0.05824	0.006	1e-05
YER070W	rnr1Y285A	YDR319C	YFT2	0.94849	0.021	1.00406	0.011	-0.05822	0.021	0
YER070W	rnr1Y285A	YDR184C	ATC1	0.90461	0.015	0.95882	0.012	-0.0581	0.015	0
YER070W	rnr1Y285A	YAL034C	FUN19	0.92294	0.017	0.98254	0.02	-0.0581	0.017	0
YER070W	rnr1Y285A	YGR201C	YGR201C	0.99807	0.009	1.05209	0.02	-0.0579	0.009	0
YER070W	rnr1Y285A	YGL136C	MRM2	0.35683	0.087	0.46269	0.087	-0.05765	0.087	0.00379
YER070W	rnr1Y285A	YGL132W	YGL132W	0.94429	0.001	1.0014	0.01	-0.05764	0.001	0
YER070W	rnr1Y285A	YJL089W	SIP4	0.9322	0.044	0.9846	0.056	-0.05757	0.044	3e-05
YER070W	rnr1Y285A	YIL152W	YIL152W	0.97643	0.017	1.03409	0.011	-0.05754	0.017	0
YER070W	rnr1Y285A	YNL008C	ASI3	1.11306	0.02	1.1626	0.048	-0.05715	0.02	0
YER070W	rnr1Y285A	YGR049W	SCM4	1.0088	0.003	1.06465	0.043	-0.05709	0.003	0
YER070W	rnr1Y285A	YDL234C	GYP7	1.01321	0.02	1.07106	0.007	-0.05706	0.02	0
YER070W	rnr1Y285A	YJL057C	IKS1	0.98985	0.047	1.04556	0.01	-0.05698	0.047	3e-05
YER070W	rnr1Y285A	YKL185W	ASH1	0.95738	0.015	1.01305	0.004	-0.05682	0.015	0
YER070W	rnr1Y285A	YDL176W	YDL176W	0.92707	0.029	0.98412	0.001	-0.05682	0.029	1e-05
YER070W	rnr1Y285A	YPR130C	YPR130C	0.9775	0.019	1.03133	0.015	-0.05672	0.019	0
YER070W	rnr1Y285A	YGR079W	YGR079W	0.95596	0.024	1.01153	0.027	-0.05658	0.024	0
YER070W	rnr1Y285A	YOR229W	WTM2	1.00695	0.006	1.06097	0.027	-0.05658	0.006	0
YER070W	rnr1Y285A	YER176W	ECM32	0.93748	0.006	0.99509	0.003	-0.05656	0.006	1e-05
YER070W	rnr1Y285A	YDL187C	YDL187C	0.99111	0.03	1.04576	0.019	-0.05642	0.03	1e-05
YER070W	rnr1Y285A	YKL218C	SRY1	1.05144	0.008	1.10806	0.01	-0.05634	0.008	0
YER070W	rnr1Y285A	YDL180W	YDL180W	0.99877	0.171	1.05356	0.023	-0.05628	0.171	0.00134
YER070W	rnr1Y285A	YJR070C	LIA1	0.85934	0.002	0.9132	0.005	-0.0562	0.002	0
YER070W	rnr1Y285A	YKR035C	YKR035C	0.70528	0.011	0.75603	0.044	-0.05609	0.011	9e-05
YER070W	rnr1Y285A	YHL002W	HSE1	0.97553	0.069	1.03402	0.007	-0.05608	0.069	0.0001
YER070W	rnr1Y285A	YOR042W	CUE5	0.96287	0.047	1.02316	0.027	-0.05597	0.047	3e-05
YER070W	rnr1Y285A	YLR407W	YLR407W	0.98414	0.022	1.04239	0.016	-0.05589	0.022	0
YER070W	rnr1Y285A	YCR086W	CSM1	0.8745	0.021	0.9287	0.009	-0.05588	0.021	0
YER070W	rnr1Y285A	YJR124C	YJR124C	0.9854	0.012	1.03758	0.009	-0.0556	0.012	0
YER070W	rnr1Y285A	YMR254C	YMR254C	0.8707	0.027	0.93129	0.02	-0.05517	0.027	1e-05
YER070W	rnr1Y285A	YJR133W	XPT1	0.97692	0.005	1.03249	0.026	-0.05495	0.005	1e-05
YER070W	rnr1Y285A	YKL050C	YKL050C	1.06562	0.008	1.11941	0.022	-0.05491	0.008	2e-05
YER070W	rnr1Y285A	YDR203W	YDR203W	0.89992	0.03	0.95388	0.011	-0.05489	0.03	1e-05
YER070W	rnr1Y285A	YOR298C-A	MBF1	0.9377	0.018	0.99124	0.006	-0.05483	0.018	0
YER070W	rnr1Y285A	YLR143W	DPH6	0.93692	0.008	0.99355	0.006	-0.05481	0.008	2e-05
YER070W	rnr1Y285A	YKR093W	PTR2	0.95234	0.024	1.01362	0.013	-0.05467	0.024	0
YER070W	rnr1Y285A	YPL147W	PXA1	0.98279	0.027	1.02785	0.037	-0.05464	0.027	1e-05
YER070W	rnr1Y285A	YPL219W	PCL8	1.04054	0.026	1.08839	0.012	-0.05453	0.026	0
YER070W	rnr1Y285A	YBL039C	URA7	0.9193	0.002	0.97596	0.026	-0.05448	0.002	0
YER070W	rnr1Y285A	YJL103C	GSM1	0.9896	0.016	1.04865	0.023	-0.05447	0.016	0
YER070W	rnr1Y285A	YLR408C	BLS1	1.03962	0.072	1.09217	0.021	-0.05438	0.072	9e-05
YER070W	rnr1Y285A	YHR138C	YHR138C	0.98545	0.025	1.04465	0.026	-0.05428	0.025	0
YER070W	rnr1Y285A	YLL045C	RPL8B	0.68816	0.022	0.7406	0.048	-0.0542	0.022	1e-05
YER070W	rnr1Y285A	YGR080W	TWF1	0.97142	0.021	1.0251	0.017	-0.05405	0.021	0
YER070W	rnr1Y285A	YKR050W	TRK2	0.92783	0.054	0.9959	0.043	-0.05402	0.054	5e-05
YER070W	rnr1Y285A	YJR037W	YJR037W	0.96783	0.02	1.01856	0.009	-0.05393	0.02	0
YER070W	rnr1Y285A	YMR012W	CLU1	0.98623	0.014	1.03777	0.045	-0.05382	0.014	6e-05
YER070W	rnr1Y285A	YJR126C	VPS70	0.94846	0.024	1.00463	0.071	-0.05376	0.024	0
YER070W	rnr1Y285A	YLR257W	YLR257W	0.99742	0.035	1.04065	0.054	-0.05375	0.035	1e-05
YER070W	rnr1Y285A	YGL054C	ERV14	0.93047	0.079	0.97905	0.036	-0.05368	0.079	0.00017
YER070W	rnr1Y285A	YNL157W	IGO1	0.9954	0.01	1.05174	0.005	-0.05341	0.01	3e-05
YER070W	rnr1Y285A	YLL046C	RNP1	0.96591	0.021	1.02286	0.018	-0.05334	0.021	0
YER070W	rnr1Y285A	YLR361C	DCR2	0.92823	0.016	0.97846	0.008	-0.0533	0.016	0.0001
YER070W	rnr1Y285A	YNL035C	YNL035C	0.93392	0.057	0.9868	0.015	-0.05329	0.057	6e-05
YER070W	rnr1Y285A	YKR029C	SET3	0.95119	0.004	1.0017	0.009	-0.05322	0.004	1e-05
YER070W	rnr1Y285A	YOL150C	YOL150C	1.07626	0.087	1.13559	0.019	-0.05317	0.087	0.00014
YER070W	rnr1Y285A	YLL055W	YCT1	0.9966	0.015	1.01346	0.116	-0.05303	0.015	0
YER070W	rnr1Y285A	YJL016W	YJL016W	0.93665	0.017	0.98707	0.011	-0.05301	0.017	0
YER070W	rnr1Y285A	YJR092W	BUD4	0.88401	0.054	0.9328	0.011	-0.05261	0.054	6e-05
YER070W	rnr1Y285A	YOL136C	PFK27	0.96547	0.044	1.01258	0.014	-0.05237	0.044	3e-05
YER070W	rnr1Y285A	YLR455W	YLR455W	0.93481	0.003	0.98847	0.03	-0.0522	0.003	0
YER070W	rnr1Y285A	YDR213W	UPC2	0.96934	0.008	1.01951	0.026	-0.05219	0.008	2e-05
YER070W	rnr1Y285A	YOL032W	OPI10	0.91224	0.038	0.96539	0.034	-0.05213	0.038	2e-05
YER070W	rnr1Y285A	YLR098C	CHA4	0.95568	0.023	1.00937	0.044	-0.05199	0.023	0
YER070W	rnr1Y285A	YOR383C	FIT3	0.98937	0.033	1.03917	0.016	-0.05191	0.033	1e-05
YER070W	rnr1Y285A	YOR071C	NRT1	0.97747	0.001	1.02651	0.016	-0.05186	0.001	0
YER070W	rnr1Y285A	YML053C	YML053C	0.91826	0.037	0.97165	0.008	-0.05185	0.037	2e-05
YER070W	rnr1Y285A	YMR164C	MSS11	0.94461	0.014	0.99832	0.015	-0.05177	0.014	0
YER070W	rnr1Y285A	YLR251W	SYM1	1.05302	0.039	1.09743	0.025	-0.05166	0.039	1e-05
YER070W	rnr1Y285A	YFL047W	RGD2	0.97392	0.026	1.02414	0.037	-0.05161	0.026	1e-05
YER070W	rnr1Y285A	YJL163C	YJL163C	0.96234	0.012	1.01332	0.015	-0.05161	0.012	0
YER070W	rnr1Y285A	YHR082C	KSP1	0.92913	0.023	0.98225	0.027	-0.0516	0.023	0
YER070W	rnr1Y285A	YER182W	FMP10	0.96886	0.024	1.02134	0.026	-0.05145	0.024	0
YER070W	rnr1Y285A	YMR138W	CIN4	1.03567	0.019	1.08579	0.03	-0.05145	0.019	0
YER070W	rnr1Y285A	YIL163C	YIL163C	0.95298	0.011	1.00638	0.011	-0.05129	0.011	0
YER070W	rnr1Y285A	YLL061W	MMP1	1.00144	0.012	1.05252	0.019	-0.05124	0.012	4e-05
YER070W	rnr1Y285A	YDR540C	IRC4	0.95415	0.049	1.00636	0.018	-0.05118	0.049	4e-05
YER070W	rnr1Y285A	YPR118W	MRI1	0.9547	0.018	1.00497	0.018	-0.05112	0.018	0
YER070W	rnr1Y285A	YLR046C	YLR046C	0.854	0.046	0.89758	0.049	-0.05111	0.046	4e-05
YER070W	rnr1Y285A	YPL170W	DAP1	0.96788	0.022	1.01327	0.02	-0.05108	0.022	0.00018
YER070W	rnr1Y285A	YOL071W	EMI5	0.94655	0.027	0.9956	0.016	-0.05097	0.027	1e-05
YER070W	rnr1Y285A	YFR032C	RRT5	1.00267	0.019	1.05533	0.032	-0.05096	0.019	0
YER070W	rnr1Y285A	YER177W	BMH1	0.79826	0.028	0.85383	0.009	-0.05078	0.028	1e-05
YER070W	rnr1Y285A	YDL124W	YDL124W	0.94973	0.002	0.99461	0.016	-0.05075	0.002	0
YER070W	rnr1Y285A	YNL028W	YNL028W	1.01336	0.057	1.0627	0.022	-0.05069	0.057	5e-05
YER070W	rnr1Y285A	YJR120W	YJR120W	0.85796	0.031	0.88131	0.133	-0.05066	0.031	0.00043
YER070W	rnr1Y285A	YGL199C	YGL199C	0.94392	0.129	0.95747	0.144	-0.05055	0.129	0.00069
YER070W	rnr1Y285A	YBL102W	SFT2	0.91896	0.003	0.96795	0.018	-0.05052	0.003	0
YER070W	rnr1Y285A	YLR453C	RIF2	1.01077	0.021	1.06058	0.029	-0.05047	0.021	0
YER070W	rnr1Y285A	YPL019C	VTC3	0.99845	0.017	1.05207	0.009	-0.05041	0.017	0
YER070W	rnr1Y285A	YPL047W	SGF11	0.89244	0.057	0.95415	0.056	-0.05041	0.057	7e-05
YER070W	rnr1Y285A	YLR019W	PSR2	1.0273	0.04	1.07206	0.009	-0.05037	0.04	2e-05
YER070W	rnr1Y285A	YLR003C	CMS1	0.96534	0.006	1.01599	0.007	-0.05035	0.006	0
YER070W	rnr1Y285A	YLR084C	RAX2	1.00902	0.098	1.06089	0.004	-0.0503	0.098	0.00025
YER070W	rnr1Y285A	YHL042W	YHL042W	1.01523	0.017	1.05614	0.037	-0.05002	0.017	0
YER070W	rnr1Y285A	YOL046C	YOL046C	0.92824	0.009	0.97856	0.031	-0.04993	0.009	3e-05
YER070W	rnr1Y285A	YOR105W	YOR105W	0.95446	0.008	1.00235	0.02	-0.04993	0.008	2e-05
YER070W	rnr1Y285A	YMR289W	ABZ2	0.99732	0.024	1.04329	0.021	-0.04987	0.024	0
YER070W	rnr1Y285A	YMR194C-A	YMR194C-A	0.94172	0.031	0.98853	0.023	-0.04982	0.031	1e-05
YER070W	rnr1Y285A	YLR102C	APC9	0.98937	0.001	1.03974	0.025	-0.0498	0.001	0
YER070W	rnr1Y285A	YOL048C	RRT8	0.97717	0.008	1.02763	0.007	-0.04966	0.008	0
YER070W	rnr1Y285A	YIL173W	VTH1	0.93422	0.035	0.98487	0.007	-0.04933	0.035	0.00046
YER070W	rnr1Y285A	YLL012W	YEH1	1.02564	0.005	1.07514	0.001	-0.04931	0.005	1e-05
YER070W	rnr1Y285A	YMR292W	GOT1	1.00094	0.033	1.042	0.05	-0.04924	0.033	1e-05
YER070W	rnr1Y285A	YDR306C	YDR306C	0.91747	0.006	0.96388	0.003	-0.04923	0.006	0
YER070W	rnr1Y285A	YDR284C	DPP1	0.97007	0.02	1.01973	0.024	-0.04922	0.02	0
YER070W	rnr1Y285A	YML017W	PSP2	0.98101	0.05	1.03062	0.04	-0.04902	0.05	4e-05
YER070W	rnr1Y285A	YLR122C	YLR122C	0.94785	0.029	0.99836	0.023	-0.04899	0.029	1e-05
YER070W	rnr1Y285A	YMR015C	ERG5	0.96346	0.026	1.01394	0.011	-0.04898	0.026	1e-05
YER070W	rnr1Y285A	YPR071W	YPR071W	0.93483	0.04	0.97998	0.014	-0.04882	0.04	2e-05
YER070W	rnr1Y285A	YOR064C	YNG1	0.99534	0.052	1.04681	0.012	-0.04868	0.052	4e-05
YER070W	rnr1Y285A	YPL021W	ECM23	1.01486	0.001	1.06343	0.009	-0.04867	0.001	0
YER070W	rnr1Y285A	YLR063W	YLR063W	1.02465	0.017	1.07019	0.045	-0.04863	0.017	0
YER070W	rnr1Y285A	YIL032C	YIL032C	1.00087	0.024	1.04962	0.027	-0.04862	0.024	0
YER070W	rnr1Y285A	YDL130W	RPP1B	0.8789	0.027	0.92645	0.029	-0.04857	0.027	1e-05
YER070W	rnr1Y285A	YGR283C	YGR283C	0.93003	0.041	0.97691	0.024	-0.04848	0.041	2e-05
YER070W	rnr1Y285A	YOR274W	MOD5	0.96305	0.002	1.01266	0.027	-0.04826	0.002	0
YER070W	rnr1Y285A	YBR205W	KTR3	0.97616	0.012	1.02373	0.007	-0.0482	0.012	0
YER070W	rnr1Y285A	YLR083C	EMP70	1.06906	0.036	1.11512	0.009	-0.04817	0.035	0.00037
YER070W	rnr1Y285A	YPL109C	YPL109C	0.95454	0.008	0.9995	0.024	-0.04805	0.008	0
YER070W	rnr1Y285A	YOL095C	HMI1	0.87632	0.01	0.92524	0.021	-0.04782	0.01	0
YER070W	rnr1Y285A	YGL056C	SDS23	0.95729	0.03	0.98136	0.175	-0.04779	0.03	0.00032
YER070W	rnr1Y285A	YMR173W-A	YMR173W-A	0.97015	0.006	1.01575	0.016	-0.04777	0.006	1e-05
YER070W	rnr1Y285A	YNL116W	DMA2	0.99825	0.021	1.05043	0.007	-0.04769	0.021	0
YER070W	rnr1Y285A	YOR166C	SWT1	0.95703	0.018	1.00515	0.025	-0.04768	0.018	0
YER070W	rnr1Y285A	YDR116C	MRPL1	0.90978	0.075	0.95791	0.007	-0.04767	0.075	0.00015
YER070W	rnr1Y285A	YHL021C	AIM17	0.92261	0.031	0.96593	0.031	-0.04764	0.031	1e-05
YER070W	rnr1Y285A	YDR036C	EHD3	0.99569	0.013	1.04112	0.013	-0.04738	0.013	0
YER070W	rnr1Y285A	YDR421W	ARO80	0.94212	0.029	0.98373	0.031	-0.04731	0.029	1e-05
YER070W	rnr1Y285A	YDR001C	NTH1	0.93995	0.033	0.98862	0.008	-0.04722	0.033	1e-05
YER070W	rnr1Y285A	YML029W	USA1	1.03433	0.034	1.07801	0.043	-0.04713	0.034	1e-05
YER070W	rnr1Y285A	YBR083W	TEC1	0.98577	0.013	1.03138	0.003	-0.04709	0.013	0
YER070W	rnr1Y285A	YMR152W	YIM1	0.9455	0.005	0.99309	0.005	-0.04705	0.005	1e-05
YER070W	rnr1Y285A	YOR055W	YOR055W	0.97917	0.025	1.03114	0.016	-0.04691	0.025	0
YER070W	rnr1Y285A	YGL236C	MTO1	0.88903	0.037	0.93483	0.017	-0.04691	0.037	2e-05
YER070W	rnr1Y285A	YHL006C	SHU1	0.96907	0.019	1.01441	0.031	-0.04688	0.019	0
YER070W	rnr1Y285A	YLR456W	YLR456W	0.98376	0.004	1.03948	0.035	-0.04681	0.004	0
YER070W	rnr1Y285A	YFR009W	GCN20	0.92382	0.113	0.97326	0.006	-0.04677	0.113	0.0005
YER070W	rnr1Y285A	YJL078C	PRY3	0.94093	0.026	0.98044	0.032	-0.04667	0.026	1e-05
YER070W	rnr1Y285A	YPL236C	ENV7	0.96406	0.011	1.01016	0.019	-0.04666	0.011	0
YER070W	rnr1Y285A	YGR026W	YGR026W	0.96044	0.018	1.00434	0.02	-0.04663	0.018	0
YER070W	rnr1Y285A	YCL034W	LSB5	0.94478	0.005	0.99164	0.021	-0.04659	0.005	1e-05
YER070W	rnr1Y285A	YMR261C	TPS3	0.91407	0.032	0.9618	0.027	-0.04654	0.032	1e-05
YER070W	rnr1Y285A	YJL007C	YJL007C	0.92983	0.016	0.97743	0.017	-0.0464	0.016	0
YER070W	rnr1Y285A	YKL214C	YRA2	1.00033	0.031	1.05048	0.04	-0.04632	0.031	1e-05
YER070W	rnr1Y285A	YDL077C	VAM6	0.27338	0.06	0.31486	0.088	-0.04628	0.06	0.00283
YER070W	rnr1Y285A	YGL235W	YGL235W	0.89421	0.009	0.93887	0.019	-0.04626	0.009	0
YER070W	rnr1Y285A	YGL215W	CLG1	0.85757	0.048	0.90272	0.071	-0.04617	0.048	5e-05
YER070W	rnr1Y285A	YDR513W	GRX2	0.97784	0.017	1.01037	0.045	-0.04608	0.017	0.00011
YER070W	rnr1Y285A	YKL061W	BLI1	0.94926	0.014	0.9979	0.005	-0.04594	0.014	0
YER070W	rnr1Y285A	YCR014C	POL4	1.00803	0.049	1.05931	0.027	-0.04589	0.049	3e-05
YER070W	rnr1Y285A	YIL165C	YIL165C	1.06837	0.083	1.11251	0.004	-0.04589	0.083	0.00013
YER070W	rnr1Y285A	YJL168C	SET2	0.87383	0.031	0.92455	0.022	-0.04587	0.031	1e-05
YER070W	rnr1Y285A	YOR304C-A	YOR304C-A	0.98505	0.013	1.02984	0.007	-0.04583	0.013	0
YER070W	rnr1Y285A	YGL028C	SCW11	0.96369	0.01	1.0091	0.017	-0.04559	0.01	0
YER070W	rnr1Y285A	YHL013C	OTU2	0.95113	0.02	1.00142	0.053	-0.04547	0.02	0
YER070W	rnr1Y285A	YGL217C	YGL217C	0.93596	0.037	0.97796	0.005	-0.04544	0.037	2e-05
YER070W	rnr1Y285A	YIL086C	YIL086C	0.96972	0.005	1.01495	0.003	-0.04543	0.005	1e-05
YER070W	rnr1Y285A	YKL179C	COY1	1.05699	0.025	1.09787	0.01	-0.04527	0.025	0
YER070W	rnr1Y285A	YPL088W	YPL088W	0.99409	0.004	1.03913	0.002	-0.04521	0.004	0
YER070W	rnr1Y285A	YBR231C	SWC5	0.66197	0.072	0.69506	0.152	-0.04512	0.072	0.00035
YER070W	rnr1Y285A	YIR027C	DAL1	0.95459	0.028	0.99584	0.021	-0.0451	0.028	1e-05
YER070W	rnr1Y285A	YLR219W	MSC3	0.94509	0.005	0.98928	0.01	-0.04504	0.005	1e-05
YER070W	rnr1Y285A	YNR074C	AIF1	0.97899	0.016	1.0262	0.038	-0.04502	0.016	0
YER070W	rnr1Y285A	YNL050C	YNL050C	0.97401	0.022	1.01831	0.015	-0.04488	0.022	0
YER070W	rnr1Y285A	YFR006W	YFR006W	0.99555	0.025	1.0402	0.007	-0.04482	0.025	0
YER070W	rnr1Y285A	YLR239C	LIP2	0.95917	0.012	1.00425	0.001	-0.04481	0.012	0
YER070W	rnr1Y285A	YKR064W	OAF3	0.95868	0.014	1.00575	0.014	-0.04464	0.014	0
YER070W	rnr1Y285A	YHL024W	RIM4	0.98519	0.004	1.03121	0.005	-0.04464	0.004	0
YER070W	rnr1Y285A	YNR022C	MRPL50	0.96234	0.002	1.00908	0.013	-0.04464	0.002	0
YER070W	rnr1Y285A	YCR036W	RBK1	1.00224	0.033	1.04645	0.002	-0.04464	0.033	1e-05
YER070W	rnr1Y285A	YBR114W	RAD16	0.9901	0.022	1.02891	0.018	-0.04462	0.022	0
YER070W	rnr1Y285A	YDR445C	YDR445C	0.94707	0.021	0.99361	0.017	-0.04449	0.021	0
YER070W	rnr1Y285A	YIL041W	GVP36	0.93514	0.012	0.98072	0.008	-0.04446	0.012	0
YER070W	rnr1Y285A	YPL009C	TAE2	0.96651	0.019	1.00854	0.013	-0.04436	0.019	0
YER070W	rnr1Y285A	YGR022C	YGR022C	0.92872	0.029	0.97531	0.013	-0.04435	0.029	1e-05
YER070W	rnr1Y285A	YGL230C	YGL230C	0.94193	0.014	0.98147	0.017	-0.04434	0.014	0
YER070W	rnr1Y285A	YLR431C	ATG23	0.99689	0.019	1.0464	0.008	-0.04434	0.019	0
YER070W	rnr1Y285A	YDR253C	MET32	0.95743	0.013	1.00029	0.019	-0.04433	0.013	0
YER070W	rnr1Y285A	YMR095C	SNO1	1.01539	0.008	1.05952	0.001	-0.04424	0.008	0
YER070W	rnr1Y285A	YDL170W	UGA3	0.96759	0.008	1.01066	0.002	-0.04421	0.008	0
YER070W	rnr1Y285A	YCL046W	YCL046W	1.00005	0.005	1.04395	0.001	-0.0442	0.005	0
YER070W	rnr1Y285A	YKL171W	NNK1	0.93076	0.02	0.98536	0.047	-0.04411	0.02	0.00016
YER070W	rnr1Y285A	YPL100W	ATG21	0.87568	0.004	0.9202	0.014	-0.04409	0.004	1e-05
YER070W	rnr1Y285A	YDR399W	HPT1	0.91949	0.011	0.96155	0.01	-0.04397	0.011	0
YER070W	rnr1Y285A	YPR114W	YPR114W	0.94623	0.019	0.99114	0.008	-0.04393	0.019	0
YER070W	rnr1Y285A	YMR221C	YMR221C	0.91663	0.029	0.96381	0.014	-0.04384	0.029	1e-05
YER070W	rnr1Y285A	YJR098C	YJR098C	0.945	0.028	0.98382	0.026	-0.04384	0.028	1e-05
YER070W	rnr1Y285A	YBR162W-A	YSY6	0.92056	0.003	0.9644	0.015	-0.0438	0.003	0
YER070W	rnr1Y285A	YIL042C	PKP1	0.95329	0.006	0.99576	0.034	-0.04378	0.006	1e-05
YER070W	rnr1Y285A	YHR049C-A	YHR049C-A	0.99883	0.021	1.04529	0.016	-0.04376	0.021	0
YER070W	rnr1Y285A	YHR080C	YHR080C	0.9751	0.001	1.0229	0.015	-0.04376	0.001	0
YER070W	rnr1Y285A	YLL005C	SPO75	1.00278	0.001	1.04099	0.026	-0.04355	0.001	0
YER070W	rnr1Y285A	YBR040W	FIG1	1.0228	0.026	1.06944	0.007	-0.04354	0.026	0
YER070W	rnr1Y285A	YLR097C	HRT3	1.00839	0.019	1.0544	0.016	-0.04338	0.019	0
YER070W	rnr1Y285A	YLR460C	YLR460C	0.9843	0.001	1.03497	0.025	-0.04319	0.001	0
YER070W	rnr1Y285A	YGR081C	SLX9	0.43042	0.219	0.55867	0.347	-0.04314	0.219	0.02937
YER070W	rnr1Y285A	YBR284W	YBR284W	0.96918	0.015	1.00969	0.007	-0.04313	0.015	0
YER070W	rnr1Y285A	YHR182W	YHR182W	1.03725	0.066	1.08024	0.038	-0.0431	0.066	7e-05
YER070W	rnr1Y285A	YJL216C	IMA5	0.92462	0.05	0.96864	0.032	-0.0431	0.05	4e-05
YER070W	rnr1Y285A	YDR259C	YAP6	0.98159	0	1.02428	0.017	-0.04303	0	0
YER070W	rnr1Y285A	YLR381W	CTF3	1.00486	0.004	1.05024	0.01	-0.04299	0.004	1e-05
YER070W	rnr1Y285A	YGR035C	YGR035C	0.94073	0.001	0.98606	0.025	-0.04285	0.001	0
YER070W	rnr1Y285A	YLR303W	MET17	0.92654	0.037	0.974	0.023	-0.04279	0.037	2e-05
YER070W	rnr1Y285A	YOR271C	FSF1	0.96507	0.023	1.00876	0.006	-0.04277	0.023	0
YER070W	rnr1Y285A	YDR165W	TRM82	0.89476	0.061	0.93616	0	-0.04261	0.061	9e-05
YER070W	rnr1Y285A	YGR010W	NMA2	0.98294	0.014	1.0282	0.017	-0.04255	0.014	0
YER070W	rnr1Y285A	YOR177C	MPC54	1.06322	0.01	1.10797	0.009	-0.04247	0.01	0
YER070W	rnr1Y285A	YJL117W	PHO86	0.92794	0.034	0.96826	0.006	-0.04239	0.034	1e-05
YER070W	rnr1Y285A	YPL134C	ODC1	1.03477	0.02	1.0749	0.026	-0.04237	0.02	0
YER070W	rnr1Y285A	YBL011W	SCT1	0.92724	0.048	0.96534	0.024	-0.04229	0.048	4e-05
YER070W	rnr1Y285A	YIL161W	YIL161W	0.90831	0.016	0.94847	0.008	-0.04193	0.016	0
YER070W	rnr1Y285A	YBR258C	SHG1	0.95743	0.028	0.99769	0.038	-0.0418	0.028	1e-05
YER070W	rnr1Y285A	YFL030W	AGX1	0.94042	0.04	0.98392	0.011	-0.04173	0.04	2e-05
YER070W	rnr1Y285A	YBR240C	THI2	0.96822	0.005	1.00587	0.029	-0.04169	0.005	0
YER070W	rnr1Y285A	YIR025W	MND2	0.94954	0.02	0.99186	0.019	-0.04166	0.02	0
YER070W	rnr1Y285A	YPR117W	YPR117W	0.94777	0.008	0.98932	0.003	-0.04165	0.008	2e-05
YER070W	rnr1Y285A	YGR045C	YGR045C	0.99347	0.024	1.03958	0.038	-0.04145	0.024	0
YER070W	rnr1Y285A	YFL043C	YFL043C	0.93006	0.023	0.96303	0.043	-0.04137	0.023	0
YER070W	rnr1Y285A	YDR260C	SWM1	0.8841	0.033	0.92592	0.03	-0.04135	0.033	0.00046
YER070W	rnr1Y285A	YKR091W	SRL3	0.96657	0.008	1.00851	0.013	-0.04122	0.008	2e-05
YER070W	rnr1Y285A	YLR211C	YLR211C	1.00134	0.02	1.048	0.018	-0.04122	0.02	0
YER070W	rnr1Y285A	YDR287W	INM2	0.94734	0.008	0.99486	0.026	-0.04122	0.008	0
YER070W	rnr1Y285A	YLR081W	GAL2	1.03884	0.033	1.0765	0.01	-0.04121	0.033	0.00033
YER070W	rnr1Y285A	YKR014C	YPT52	1.00578	0.014	1.0504	0.01	-0.04106	0.014	0
YER070W	rnr1Y285A	YJL213W	YJL213W	0.95561	0.014	0.99622	0.014	-0.04099	0.014	0
YER070W	rnr1Y285A	YOR129C	AFI1	0.95565	0.017	0.99746	0.018	-0.04083	0.017	0
YER070W	rnr1Y285A	YDR015C	YDR015C	1.04525	0.013	1.08612	0.004	-0.04077	0.013	0
YER070W	rnr1Y285A	YBR150C	TBS1	0.94205	0.023	0.98384	0.005	-0.04077	0.023	0
YER070W	rnr1Y285A	YMR058W	FET3	1.00295	0.014	1.04455	0.016	-0.04076	0.014	0
YER070W	rnr1Y285A	YOR333C	YOR333C	0.89541	0.008	0.93638	0.002	-0.04075	0.008	2e-05
YER070W	rnr1Y285A	YMR282C	AEP2	0.98152	0.014	1.01737	0.018	-0.04065	0.014	0
YER070W	rnr1Y285A	YOL053W	AIM39	0.99337	0.011	1.03195	0.017	-0.04062	0.011	0
YER070W	rnr1Y285A	YDR494W	RSM28	1.01361	0.003	1.05464	0.014	-0.0406	0.003	0
YER070W	rnr1Y285A	YJR009C	TDH2	1.06496	0.012	1.09674	0.035	-0.04052	0.012	0
YER070W	rnr1Y285A	YOR115C	TRS33	0.94227	0.031	0.97486	0.04	-0.0404	0.031	1e-05
YER070W	rnr1Y285A	YCL006C	YCL006C	0.96682	0.01	1.00322	0.026	-0.04038	0.01	3e-05
YER070W	rnr1Y285A	YFL015C	YFL015C	1.05238	0.027	1.09572	0.013	-0.04037	0.027	0
YER070W	rnr1Y285A	YDR415C	YDR415C	0.94329	0.036	0.98911	0.012	-0.0403	0.036	0.00048
YER070W	rnr1Y285A	YML018C	YML018C	1.10712	0.003	1.14576	0.046	-0.04029	0.003	0
YER070W	rnr1Y285A	YML107C	PML39	0.86344	0.029	0.89992	0.028	-0.04017	0.029	1e-05
YER070W	rnr1Y285A	YLR150W	STM1	0.9386	0.005	0.98066	0.007	-0.0401	0.005	1e-05
YER070W	rnr1Y285A	YLR144C	ACF2	0.91688	0.01	0.96201	0.011	-0.04007	0.01	4e-05
YER070W	rnr1Y285A	YOR088W	YOR088W	0.95998	0.015	1.00017	0.007	-0.04005	0.015	0
YER070W	rnr1Y285A	YKR061W	KTR2	0.97854	0.015	1.01827	0.003	-0.03991	0.015	0
YER070W	rnr1Y285A	YNL003C	PET8	1.09822	0.008	1.136	0.02	-0.03989	0.008	2e-05
YER070W	rnr1Y285A	YGR086C	PIL1	0.98415	0.037	1.02564	0.021	-0.03986	0.037	1e-05
YER070W	rnr1Y285A	YCR060W	TAH1	0.97034	0.132	1.00764	0.006	-0.03984	0.132	0.00069
YER070W	rnr1Y285A	YDR094W	YDR094W	0.92684	0.032	0.95974	0.036	-0.03983	0.032	1e-05
YER070W	rnr1Y285A	YOR185C	GSP2	0.96667	0.017	1.00512	0.043	-0.0398	0.017	0
YER070W	rnr1Y285A	YGR154C	GTO1	0.95821	0.034	0.9801	0.031	-0.03956	0.034	1e-05
YER070W	rnr1Y285A	YKR087C	OMA1	1.04628	0.012	1.08214	0.023	-0.03954	0.012	0
YER070W	rnr1Y285A	YGR242W	YGR242W	0.99978	0.023	1.03335	0.03	-0.03953	0.023	0
YER070W	rnr1Y285A	YML032C	RAD52	0.65734	0.046	0.70623	0.04	-0.03952	0.046	9e-05
YER070W	rnr1Y285A	YPR153W	YPR153W	1.01853	0.005	1.05811	0.002	-0.03952	0.005	1e-05
YER070W	rnr1Y285A	YBR261C	TAE1	0.91849	0.029	0.9593	0.013	-0.03949	0.029	1e-05
YER070W	rnr1Y285A	YBR052C	RFS1	0.92885	0.006	0.96754	0.03	-0.03944	0.006	1e-05
YER070W	rnr1Y285A	YLR306W	UBC12	1.02494	0.003	1.05606	0.028	-0.03934	0.003	0
YER070W	rnr1Y285A	YGR028W	MSP1	0.97983	0.007	1.01807	0.01	-0.03932	0.007	0
YER070W	rnr1Y285A	YOR097C	YOR097C	0.9392	0.04	0.98008	0.028	-0.03918	0.04	2e-05
YER070W	rnr1Y285A	YOR164C	GET4	0.95999	0.017	1.00584	0.03	-0.0391	0.017	0
YER070W	rnr1Y285A	YLR109W	AHP1	1.00349	0.01	1.03962	0.018	-0.03906	0.01	0
YER070W	rnr1Y285A	YBR141C	YBR141C	0.96597	0.014	1.00228	0.012	-0.03901	0.014	0
YER070W	rnr1Y285A	YMR320W	YMR320W	1.01491	0.039	1.05468	0.006	-0.03895	0.039	2e-05
YER070W	rnr1Y285A	YDR271C	YDR271C	1.00163	0.025	1.03833	0.023	-0.03893	0.025	0
YER070W	rnr1Y285A	YPR083W	MDM36	1.07691	0.023	1.11577	0.012	-0.03891	0.023	0
YER070W	rnr1Y285A	YDR451C	YHP1	0.94608	0.001	0.99177	0.029	-0.03886	0.001	0
YER070W	rnr1Y285A	YOR223W	YOR223W	0.95134	0.006	0.98988	0.016	-0.03872	0.006	0
YER070W	rnr1Y285A	YCL012W	YCL012W	0.96424	0.009	1.00031	0.007	-0.03869	0.009	3e-05
YER070W	rnr1Y285A	YGL037C	PNC1	0.96534	0.009	1.00504	0.006	-0.03863	0.009	0
YER070W	rnr1Y285A	YPR076W	YPR076W	0.93692	0.029	0.97073	0.016	-0.03862	0.029	1e-05
YER070W	rnr1Y285A	YIL139C	REV7	0.97055	0.054	1.00982	0.014	-0.03849	0.054	5e-05
YER070W	rnr1Y285A	YPL072W	UBP16	0.9936	0.025	1.03566	0.027	-0.03844	0.025	0
YER070W	rnr1Y285A	YIL138C	TPM2	0.95848	0.017	0.99622	0.005	-0.03839	0.017	0
YER070W	rnr1Y285A	YOR240W	YOR240W	0.96828	0.009	1.00562	0.004	-0.03832	0.009	3e-05
YER070W	rnr1Y285A	YOR243C	PUS7	1.0006	0.002	1.04086	0.004	-0.0383	0.002	0
YER070W	rnr1Y285A	YPL229W	YPL229W	0.99497	0.014	1.02087	0.041	-0.03826	0.014	0
YER070W	rnr1Y285A	YOL053C-A	YOL053C-A	0.99848	0.024	1.04923	0.024	-0.03824	0.024	0.0002
YER070W	rnr1Y285A	YJL139C	YUR1	0.66604	0.131	0.6799	0.044	-0.03819	0.131	0.00204
YER070W	rnr1Y285A	YDL186W	YDL186W	0.93954	0.019	0.97361	0.007	-0.03813	0.019	0
YER070W	rnr1Y285A	YKR105C	VBA5	0.94852	0.012	0.99227	0.022	-0.03812	0.012	6e-05
YER070W	rnr1Y285A	YPL183W-A	RTC6	0.82983	0.023	0.86645	0.006	-0.03809	0.023	1e-05
YER070W	rnr1Y285A	YGR136W	LSB1	0.97681	0.018	1.01462	0.014	-0.038	0.018	0
YER070W	rnr1Y285A	YLR179C	YLR179C	1.04954	0.04	1.08643	0.021	-0.03794	0.04	1e-05
YER070W	rnr1Y285A	YFL042C	YFL042C	0.96761	0.02	1.00502	0.005	-0.0378	0.02	0
YER070W	rnr1Y285A	YOR018W	ROD1	0.77018	0.015	0.81238	0.03	-0.03779	0.015	0.00013
YER070W	rnr1Y285A	YPR090W	YPR090W	1.05681	0.048	1.08393	0.047	-0.03774	0.048	3e-05
YER070W	rnr1Y285A	YKR033C	YKR033C	0.97707	0.02	1.01121	0.013	-0.03764	0.02	0
YER070W	rnr1Y285A	YOR230W	WTM1	1.00576	0.067	1.04278	0.019	-0.03764	0.067	8e-05
YER070W	rnr1Y285A	YPR093C	ASR1	0.96329	0.053	0.99717	0.013	-0.03762	0.053	5e-05
YER070W	rnr1Y285A	YPR028W	YOP1	0.93598	0.023	0.96763	0.018	-0.03759	0.023	0
YER070W	rnr1Y285A	YMR103C	YMR103C	0.9614	0.017	1.00356	0.016	-0.03758	0.017	0
YER070W	rnr1Y285A	YLR070C	XYL2	0.98025	0.015	1.01554	0.02	-0.03754	0.015	0
YER070W	rnr1Y285A	YMR054W	STV1	0.96708	0.011	1.00569	0.004	-0.0375	0.011	0
YER070W	rnr1Y285A	YMR011W	HXT2	0.78304	0.031	0.81109	0.033	-0.03743	0.031	2e-05
YER070W	rnr1Y285A	YKL211C	TRP3	0.97901	0.005	1.01638	0.035	-0.03733	0.005	1e-05
YER070W	rnr1Y285A	YOR126C	IAH1	1.01939	0.034	1.05253	0.033	-0.03733	0.034	1e-05
YER070W	rnr1Y285A	YDR522C	SPS2	0.98955	0.006	1.03101	0.02	-0.03731	0.006	1e-05
YER070W	rnr1Y285A	YDL230W	PTP1	0.99508	0.019	1.03194	0.036	-0.03728	0.019	0.00012
YER070W	rnr1Y285A	YDR151C	CTH1	1.01697	0.037	1.04946	0.031	-0.0372	0.037	1e-05
YER070W	rnr1Y285A	YAR029W	YAR029W	0.98363	0.037	1.02427	0.043	-0.03717	0.037	1e-05
YER070W	rnr1Y285A	YLR095C	IOC2	0.92752	0.017	0.95187	0.026	-0.03706	0.017	0.00012
YER070W	rnr1Y285A	YDR467C	YDR467C	1.061	0.021	1.0963	0.004	-0.03703	0.021	0
YER070W	rnr1Y285A	YHL017W	YHL017W	0.97958	0.014	1.01915	0.011	-0.03702	0.014	0
YER070W	rnr1Y285A	YNR062C	YNR062C	0.95832	0.019	0.98987	0.016	-0.03699	0.019	0
YER070W	rnr1Y285A	YOR121C	YOR121C	0.95107	0.01	0.99291	0.017	-0.03699	0.01	0
YER070W	rnr1Y285A	YDL119C	YDL119C	0.99259	0.004	1.02587	0.014	-0.03696	0.004	1e-05
YER070W	rnr1Y285A	YPL230W	USV1	0.95509	0.06	0.98252	0.044	-0.03693	0.06	7e-05
YER070W	rnr1Y285A	YCR033W	SNT1	0.99133	0.01	1.02845	0.02	-0.03692	0.01	0
YER070W	rnr1Y285A	YGR235C	MOS2	1.00402	0.034	1.0378	0.042	-0.03682	0.034	1e-05
YER070W	rnr1Y285A	YJL083W	TAX4	0.97363	0.078	1.00127	0.039	-0.03682	0.078	0.00014
YER070W	rnr1Y285A	YIL044C	AGE2	0.88572	0.016	0.91972	0.03	-0.03667	0.016	0
YER070W	rnr1Y285A	YPR115W	RGC1	1.0651	0.052	1.09998	0.003	-0.03667	0.052	3e-05
YER070W	rnr1Y285A	YPL004C	LSP1	0.99726	0.009	1.03379	0.003	-0.03655	0.009	0
YER070W	rnr1Y285A	YJR117W	STE24	0.95892	0.015	0.99153	0.027	-0.03654	0.015	0
YER070W	rnr1Y285A	YLR191W	PEX13	0.83164	0.049	0.84731	0.074	-0.03654	0.049	5e-05
YER070W	rnr1Y285A	YOR317W	FAA1	1.00783	0.029	1.04466	0.021	-0.03654	0.029	1e-05
YER070W	rnr1Y285A	YDR157W	YDR157W	1.06935	0.008	1.10317	0.008	-0.0365	0.008	0
YER070W	rnr1Y285A	YDL100C	GET3	0.95771	0.015	0.98859	0.026	-0.03644	0.015	0
YER070W	rnr1Y285A	YDR223W	CRF1	0.96613	0.02	1.00293	0.019	-0.03639	0.02	0
YER070W	rnr1Y285A	YLR183C	TOS4	1.0066	0.026	1.04171	0.025	-0.03638	0.026	0
YER070W	rnr1Y285A	YDL133W	SRF1	1.02496	0.027	1.0594	0.022	-0.03634	0.027	1e-05
YER070W	rnr1Y285A	YCL048W	SPS22	0.97775	0.01	1.01193	0.004	-0.0363	0.01	0
YER070W	rnr1Y285A	YDR117C	TMA64	1.05385	0.015	1.08877	0.007	-0.03621	0.015	0
YER070W	rnr1Y285A	YOL083W	ATG34	1.0123	0.018	1.04993	0.008	-0.0362	0.018	0
YER070W	rnr1Y285A	YLR214W	FRE1	0.96608	0.012	0.99969	0.026	-0.03611	0.012	0
YER070W	rnr1Y285A	YKL150W	MCR1	0.93972	0.029	0.9691	0.069	-0.03601	0.029	1e-05
YER070W	rnr1Y285A	YPL246C	RBD2	0.9624	0.03	0.99874	0.015	-0.03601	0.03	1e-05
YER070W	rnr1Y285A	YMR172C-A	YMR172C-A	1.03941	0.03	1.07588	0.017	-0.03588	0.03	1e-05
YER070W	rnr1Y285A	YBR138C	YBR138C	1.02628	0.004	1.06324	0.025	-0.03586	0.004	0
YER070W	rnr1Y285A	YML099C	ARG81	1.04656	0.035	1.0798	0.011	-0.03577	0.035	1e-05
YER070W	rnr1Y285A	YHR202W	YHR202W	0.95641	0.012	0.99688	0.034	-0.03574	0.012	0
YER070W	rnr1Y285A	YPL194W	DDC1	1.01624	0.006	1.05196	0.03	-0.03573	0.006	0
YER070W	rnr1Y285A	YBR223C	TDP1	0.94882	0.024	0.98664	0.012	-0.03567	0.024	0
YER070W	rnr1Y285A	YJR154W	YJR154W	1.01676	0.022	1.04701	0.044	-0.0356	0.022	0
YER070W	rnr1Y285A	YHL008C	YHL008C	0.98446	0.141	1.01943	0.02	-0.03555	0.141	0.0008
YER070W	rnr1Y285A	YLL024C	SSA2	1.0112	0.043	1.0479	0.013	-0.03532	0.043	2e-05
YER070W	rnr1Y285A	YOR209C	NPT1	0.95986	0.014	0.99429	0.007	-0.03531	0.014	0
YER070W	rnr1Y285A	YBR129C	OPY1	0.94106	0.016	0.97471	0.029	-0.03526	0.016	0
YER070W	rnr1Y285A	YMR172W	HOT1	0.92286	0.012	0.9588	0.005	-0.03514	0.012	0
YER070W	rnr1Y285A	YMR295C	YMR295C	1.0221	0.03	1.05978	0.045	-0.03513	0.03	1e-05
YER070W	rnr1Y285A	YPL073C	YPL073C	0.95317	0.006	0.98791	0.009	-0.03511	0.006	0
YER070W	rnr1Y285A	YJR128W	YJR128W	0.99602	0.014	1.03296	0.008	-0.03509	0.014	0
YER070W	rnr1Y285A	YBL106C	SRO77	0.99174	0.029	1.02732	0.016	-0.03499	0.029	1e-05
YER070W	rnr1Y285A	YPL055C	LGE1	0.79596	0.056	0.83503	0.03	-0.03499	0.056	0.0001
YER070W	rnr1Y285A	YMR031C	EIS1	0.92042	0.097	0.9246	0.144	-0.03496	0.097	0.00032
YER070W	rnr1Y285A	YBR116C	YBR116C	0.96937	0.004	1.00541	0.027	-0.03494	0.004	1e-05
YER070W	rnr1Y285A	YMR124W	YMR124W	1.04567	0.064	1.07387	0.046	-0.03483	0.064	6e-05
YER070W	rnr1Y285A	YGR276C	RNH70	0.97368	0.001	1.0111	0.017	-0.03476	0.001	0
YER070W	rnr1Y285A	YCR048W	ARE1	1.01071	0.02	1.04304	0.029	-0.03472	0.02	0
YER070W	rnr1Y285A	YDR479C	PEX29	1.00873	0.014	1.04389	0.013	-0.0345	0.014	0
YER070W	rnr1Y285A	YHR171W	ATG7	0.94867	0.001	0.98175	0.01	-0.03447	0.001	0
YER070W	rnr1Y285A	YKL167C	MRP49	0.95922	0.083	0.99305	0.002	-0.03441	0.083	0.00018
YER070W	rnr1Y285A	YPR050C	YPR050C	0.90972	0.088	0.92214	0.053	-0.03437	0.088	0.00025
YER070W	rnr1Y285A	YNL034W	YNL034W	0.96892	0.005	1.00105	0.004	-0.03431	0.005	1e-05
YER070W	rnr1Y285A	YOR306C	MCH5	1.00187	0.007	1.0354	0.019	-0.03428	0.007	0
YER070W	rnr1Y285A	YLR363C	NMD4	0.98467	0.016	1.0229	0.019	-0.03421	0.016	0
YER070W	rnr1Y285A	YBR100W	YBR100W	0.90522	0.013	0.93684	0.011	-0.03421	0.013	0
YER070W	rnr1Y285A	YDR183W	PLP1	0.9001	0.008	0.92952	0.02	-0.03419	0.008	0
YER070W	rnr1Y285A	YCR016W	YCR016W	0.98343	0.026	1.01879	0.003	-0.03416	0.026	1e-05
YER070W	rnr1Y285A	YDR055W	PST1	1.02527	0.059	1.0602	0.016	-0.03411	0.059	5e-05
YER070W	rnr1Y285A	YDL142C	CRD1	0.94393	0.012	0.97741	0.026	-0.03407	0.012	0
YER070W	rnr1Y285A	YFR012W	DCV1	0.93966	0.046	0.97235	0.029	-0.03404	0.046	3e-05
YER070W	rnr1Y285A	YGL254W	FZF1	0.95966	0.026	0.9923	0.014	-0.03403	0.026	1e-05
YER070W	rnr1Y285A	YLR352W	YLR352W	0.98169	0.015	1.01443	0.004	-0.03401	0.015	0
YER070W	rnr1Y285A	YIR036C	IRC24	1.0254	0.002	1.05852	0.014	-0.03399	0.002	0
YER070W	rnr1Y285A	YBR300C	YBR300C	0.92047	0.019	0.95268	0.005	-0.03386	0.019	0
YER070W	rnr1Y285A	YNR047W	FPK1	0.99131	0.02	1.02504	0.017	-0.03385	0.02	0
YER070W	rnr1Y285A	YGL146C	RRT6	0.89856	0.007	0.93055	0.014	-0.03385	0.007	2e-05
YER070W	rnr1Y285A	YPR201W	ARR3	0.95889	0.02	0.9925	0.001	-0.0338	0.02	0
YER070W	rnr1Y285A	YKL098W	MTC2	1.01328	0.02	1.04605	0.003	-0.03377	0.02	0
YER070W	rnr1Y285A	YNL042W	BOP3	1.00816	0.028	1.0384	0.014	-0.0337	0.028	1e-05
YER070W	rnr1Y285A	YHR139C	SPS100	1.02393	0.008	1.05995	0.013	-0.03368	0.008	0
YER070W	rnr1Y285A	YDR309C	GIC2	1.00813	0.025	1.03157	0.031	-0.03368	0.025	0
YER070W	rnr1Y285A	YKL200C	YKL200C	1.09205	0.01	1.12283	0.031	-0.03364	0.01	0
YER070W	rnr1Y285A	YAL030W	SNC1	0.99292	0.019	1.0271	0.006	-0.03358	0.019	0
YER070W	rnr1Y285A	YNL023C	FAP1	0.97219	0.033	1.00429	0.004	-0.03356	0.033	1e-05
YER070W	rnr1Y285A	YOR053W	YOR053W	0.86928	0.033	0.90387	0	-0.03348	0.033	1e-05
YER070W	rnr1Y285A	YCR022C	YCR022C	1.0204	0.072	1.05143	0.004	-0.03339	0.072	0.0001
YER070W	rnr1Y285A	YGR129W	SYF2	0.99873	0.018	1.03281	0.023	-0.03335	0.018	0
YER070W	rnr1Y285A	YNL130C	CPT1	0.97748	0.065	1.00049	0.072	-0.03334	0.065	8e-05
YER070W	rnr1Y285A	YBR176W	ECM31	0.42822	0.004	0.4449	0.067	-0.0333	0.004	3e-05
YER070W	rnr1Y285A	YFR013W	IOC3	0.91982	0.015	0.95232	0.018	-0.03317	0.015	0
YER070W	rnr1Y285A	YDL156W	CMR1	0.98364	0.075	1.01618	0.005	-0.03314	0.075	0.00012
YER070W	rnr1Y285A	YHR150W	PEX28	0.96014	0.03	0.99414	0.008	-0.03308	0.03	1e-05
YER070W	rnr1Y285A	YGL140C	YGL140C	0.98488	0.015	1.01946	0.014	-0.03308	0.015	0
YER070W	rnr1Y285A	YIL140W	AXL2	0.99732	0.127	1.03135	0.014	-0.03307	0.127	0.00056
YER070W	rnr1Y285A	YBR014C	GRX7	0.93468	0.071	0.96798	0.079	-0.03303	0.071	0.00012
YER070W	rnr1Y285A	YFR021W	ATG18	0.90755	0.007	0.93895	0.006	-0.03288	0.007	2e-05
YER070W	rnr1Y285A	YFL027C	GYP8	0.98568	0.03	1.01846	0.017	-0.03286	0.03	1e-05
YER070W	rnr1Y285A	YDL066W	IDP1	0.99963	0.021	1.02954	0.022	-0.03277	0.021	0
YER070W	rnr1Y285A	YOR120W	GCY1	0.96296	0.015	0.9966	0.013	-0.03274	0.015	0
YER070W	rnr1Y285A	YKL130C	SHE2	1.0405	0.034	1.06578	0.04	-0.03272	0.034	1e-05
YER070W	rnr1Y285A	YPR052C	NHP6A	0.98543	0.051	1.01751	0.008	-0.03269	0.051	4e-05
YER070W	rnr1Y285A	YDR444W	YDR444W	1.06487	0.012	1.09551	0.021	-0.03267	0.012	0
YER070W	rnr1Y285A	YGR177C	ATF2	1.0735	0.028	1.10839	0.022	-0.03263	0.028	1e-05
YER070W	rnr1Y285A	YBR207W	FTH1	1.01933	0.01	1.05174	0.003	-0.03262	0.01	0
YER070W	rnr1Y285A	YAR030C	YAR030C	0.98661	0.007	1.02253	0.01	-0.03259	0.007	0
YER070W	rnr1Y285A	YLR446W	YLR446W	0.96826	0.008	0.99621	0.024	-0.03257	0.008	2e-05
YER070W	rnr1Y285A	YIR007W	YIR007W	0.97085	0.019	1.00375	0.014	-0.03256	0.019	0
YER070W	rnr1Y285A	YKR098C	UBP11	1.02968	0.019	1.06313	0.018	-0.03253	0.019	0
YER070W	rnr1Y285A	YOR019W	YOR019W	1.02127	0.008	1.05524	0.001	-0.03247	0.008	0
YER070W	rnr1Y285A	YBR050C	REG2	0.97014	0.03	0.99316	0.017	-0.03244	0.03	1e-05
YER070W	rnr1Y285A	YGR212W	SLI1	1.04102	0.045	1.06708	0.031	-0.03243	0.045	2e-05
YER070W	rnr1Y285A	YOL088C	MPD2	1.00219	0.036	1.03588	0.012	-0.03241	0.036	1e-05
YER070W	rnr1Y285A	YOR167C	RPS28A	0.95708	0.021	0.98737	0.046	-0.03239	0.021	0
YER070W	rnr1Y285A	YKL199C	YKL199C	1.01114	0.024	1.02954	0.045	-0.03238	0.024	0
YER070W	rnr1Y285A	YCR045C	RRT12	1.00746	0.014	1.04334	0.024	-0.03226	0.014	0
YER070W	rnr1Y285A	YDR123C	INO2	0.42868	0.031	0.4601	0.006	-0.03222	0.031	0.00011
YER070W	rnr1Y285A	YHR163W	SOL3	0.98515	0.027	1.01668	0.009	-0.03211	0.027	1e-05
YER070W	rnr1Y285A	YER180C	ISC10	0.9958	0.026	1.03276	0.032	-0.03209	0.026	0
YER070W	rnr1Y285A	YDR438W	THI74	0.95064	0.007	0.98292	0.013	-0.03202	0.007	0
YER070W	rnr1Y285A	YOR087W	YVC1	0.94245	0.023	0.97841	0.012	-0.032	0.023	0
YER070W	rnr1Y285A	YAL011W	SWC3	0.93709	0.019	0.96687	0.025	-0.03196	0.019	0
YER070W	rnr1Y285A	YPL052W	OAZ1	0.9845	0.016	1.01322	0.007	-0.03183	0.016	0
YER070W	rnr1Y285A	YDR051C	DET1	1.01319	0.022	1.04175	0.009	-0.03177	0.022	0
YER070W	rnr1Y285A	YOL007C	CSI2	0.97797	0.014	1.00896	0.005	-0.03159	0.014	7e-05
YER070W	rnr1Y285A	YDL239C	ADY3	0.90214	0.011	0.93176	0.011	-0.03159	0.011	0
YER070W	rnr1Y285A	YKL048C	ELM1	0.76155	0.065	0.77447	0.075	-0.03155	0.065	0.00017
YER070W	rnr1Y285A	YDR515W	SLF1	0.97274	0.051	0.99765	0.019	-0.03153	0.051	4e-05
YER070W	rnr1Y285A	YOR008C-A	YOR008C-A	0.96554	0.019	1.00107	0.006	-0.0315	0.019	0
YER070W	rnr1Y285A	YBL048W	YBL048W	0.97896	0.002	1.00939	0.01	-0.03148	0.002	0
YER070W	rnr1Y285A	YNL013C	YNL013C	0.92212	0.08	0.95565	0.023	-0.0314	0.08	0.00018
YER070W	rnr1Y285A	YFR022W	ROG3	0.9916	0.017	1.02273	0.004	-0.03137	0.017	0
YER070W	rnr1Y285A	YBR018C	GAL7	1.0109	0.059	1.04731	0.049	-0.03136	0.059	5e-05
YER070W	rnr1Y285A	YOL056W	GPM3	0.97334	0.036	1.00418	0.035	-0.0313	0.036	1e-05
YER070W	rnr1Y285A	YOL151W	GRE2	0.95837	0.099	0.99855	0.026	-0.03126	0.099	0.0003
YER070W	rnr1Y285A	YPR154W	PIN3	0.99025	0.025	1.01837	0.015	-0.03126	0.025	0
YER070W	rnr1Y285A	YDR304C	CPR5	0.93095	0.028	0.95274	0.038	-0.03125	0.028	1e-05
YER070W	rnr1Y285A	YOL098C	YOL098C	1.02923	0.018	1.06787	0.029	-0.03116	0.018	0
YER070W	rnr1Y285A	YCR088W	ABP1	0.99399	0.027	1.02243	0.01	-0.03112	0.027	1e-05
YER070W	rnr1Y285A	YPL240C	HSP82	0.92597	0.023	0.95709	0.015	-0.03112	0.023	0
YER070W	rnr1Y285A	YBR042C	CST26	0.97967	0.003	1.01149	0.002	-0.03106	0.003	0
YER070W	rnr1Y285A	YBR286W	APE3	0.92382	0.017	0.956	0.015	-0.03097	0.017	0
YER070W	rnr1Y285A	YKR070W	YKR070W	1.04446	0.026	1.0803	0.027	-0.03096	0.026	0
YER070W	rnr1Y285A	YNR069C	BSC5	0.96297	0.015	0.99615	0.01	-0.03089	0.015	0
YER070W	rnr1Y285A	YKL085W	MDH1	0.95833	0.014	0.98756	0.006	-0.03088	0.014	0
YER070W	rnr1Y285A	YBR158W	AMN1	0.99497	0.025	1.02219	0.016	-0.03085	0.025	0
YER070W	rnr1Y285A	YCL010C	SGF29	0.85906	0.044	0.89099	0.013	-0.03079	0.044	4e-05
YER070W	rnr1Y285A	YPL058C	PDR12	1.01299	0.005	1.03984	0.027	-0.03075	0.005	1e-05
YER070W	rnr1Y285A	YHR130C	YHR130C	0.98093	0.007	1.01589	0.023	-0.03067	0.007	0
YER070W	rnr1Y285A	YGL094C	PAN2	1.053	0.04	1.08849	0.037	-0.03067	0.04	1e-05
YER070W	rnr1Y285A	YBR020W	GAL1	0.97647	0.006	1.01913	0.04	-0.03066	0.006	1e-05
YER070W	rnr1Y285A	YKL062W	MSN4	0.93343	0.007	0.95747	0.036	-0.03065	0.007	2e-05
YER070W	rnr1Y285A	YBR043C	QDR3	0.94023	0.012	0.97369	0.02	-0.03064	0.012	0
YER070W	rnr1Y285A	YPL014W	YPL014W	0.99292	0.011	1.02324	0.011	-0.03061	0.011	0
YER070W	rnr1Y285A	YHL040C	ARN1	0.97037	0.005	0.98781	0.045	-0.0305	0.005	1e-05
YER070W	rnr1Y285A	YLL032C	YLL032C	0.97433	0.014	1.00518	0.01	-0.03045	0.014	0
YER070W	rnr1Y285A	YLR278C	YLR278C	1.02829	0.058	1.06499	0.044	-0.03038	0.058	5e-05
YER070W	rnr1Y285A	YGL118C	YGL118C	0.98539	0.022	1.01629	0.008	-0.03035	0.022	0
YER070W	rnr1Y285A	YAL043C-A	YAL043C-A	0.94788	0.011	0.97635	0.013	-0.0303	0.011	0
YER070W	rnr1Y285A	YOL036W	YOL036W	0.8632	0.182	0.88003	0.146	-0.03028	0.182	0.00247
YER070W	rnr1Y285A	YOL059W	GPD2	0.97925	0.011	1.01052	0.003	-0.03024	0.011	0
YER070W	rnr1Y285A	YBR250W	SPO23	0.95677	0.002	0.9861	0.011	-0.03016	0.002	0
YER070W	rnr1Y285A	YLR177W	YLR177W	0.93407	0.017	0.96369	0.013	-0.03004	0.017	0
YER070W	rnr1Y285A	YLR225C	YLR225C	0.95684	0.096	0.96815	0.071	-0.03004	0.096	0.00027
YER070W	rnr1Y285A	YGL114W	YGL114W	0.92966	0.078	0.97653	0.032	-0.03	0.078	0.00016
YER070W	rnr1Y285A	YOR173W	DCS2	1.04491	0.024	1.06864	0.038	-0.02992	0.024	0
YER070W	rnr1Y285A	YHR105W	YPT35	0.96219	0.028	0.99057	0.014	-0.02987	0.028	1e-05
YER070W	rnr1Y285A	YGL227W	VID30	0.98868	0.054	1.0185	0.003	-0.02977	0.054	4e-05
YER070W	rnr1Y285A	YBR241C	YBR241C	0.96657	0.009	0.99144	0.026	-0.02976	0.009	0
YER070W	rnr1Y285A	YMR182C	RGM1	1.03315	0.015	1.06459	0.019	-0.0296	0.015	0
YER070W	rnr1Y285A	YNL095C	YNL095C	1.00052	0.019	1.03587	0.023	-0.02952	0.019	0
YER070W	rnr1Y285A	YDL104C	QRI7	0.94821	0.017	0.97302	0.021	-0.02951	0.017	0
YER070W	rnr1Y285A	YML081C-A	ATP18	0.97869	0.019	1.00464	0.04	-0.02949	0.019	0
YER070W	rnr1Y285A	YOR284W	HUA2	0.99684	0.003	1.02434	0.007	-0.02945	0.003	0
YER070W	rnr1Y285A	YOR378W	YOR378W	0.96957	0.027	0.99904	0.022	-0.02944	0.027	1e-05
YER070W	rnr1Y285A	YBR047W	FMP23	0.98468	0.022	1.01245	0.009	-0.02939	0.022	0
YER070W	rnr1Y285A	YPR199C	ARR1	0.99834	0.017	1.02428	0.009	-0.02931	0.017	0
YER070W	rnr1Y285A	YGL059W	PKP2	0.94014	0.052	0.97134	0.017	-0.02924	0.052	5e-05
YER070W	rnr1Y285A	YGR052W	FMP48	0.95843	0.045	0.98055	0.038	-0.02923	0.045	3e-05
YER070W	rnr1Y285A	YCR065W	HCM1	0.93258	0.033	0.96514	0.028	-0.02921	0.033	1e-05
YER070W	rnr1Y285A	YGR053C	YGR053C	0.95976	0.007	0.99584	0.029	-0.02919	0.007	2e-05
YER070W	rnr1Y285A	YHR006W	STP2	0.9633	0.029	0.99368	0.007	-0.0291	0.029	1e-05
YER070W	rnr1Y285A	YMR250W	GAD1	0.93319	0.032	0.96904	0.049	-0.02907	0.032	1e-05
YER070W	rnr1Y285A	YBR074W	YBR074W	0.97951	0.01	1.00873	0.008	-0.02907	0.01	0
YER070W	rnr1Y285A	YFL044C	OTU1	0.99754	0.019	1.02763	0.013	-0.02903	0.019	0
YER070W	rnr1Y285A	YPR170C	YPR170C	1.00146	0.018	1.02603	0.014	-0.02898	0.018	0
YER070W	rnr1Y285A	YGL209W	MIG2	0.99956	0.002	1.02189	0.022	-0.0289	0.002	0
YER070W	rnr1Y285A	YJR091C	JSN1	0.97585	0.003	1.0096	0.017	-0.02889	0.003	0
YER070W	rnr1Y285A	YMR074C	YMR074C	0.94203	0.023	0.96933	0.005	-0.02883	0.023	0
YER070W	rnr1Y285A	YDR516C	EMI2	1.04842	0.004	1.07573	0.016	-0.0288	0.004	0
YER070W	rnr1Y285A	YDR089W	YDR089W	0.975	0.02	1.00181	0.019	-0.0288	0.02	0
YER070W	rnr1Y285A	YGL261C	PAU11	0.91662	0.011	0.94122	0.007	-0.02872	0.011	0
YER070W	rnr1Y285A	YBL052C	SAS3	0.99906	0.019	1.02845	0.008	-0.02871	0.019	0
YER070W	rnr1Y285A	YPR059C	YPR059C	0.97797	0.019	1.003	0.018	-0.0287	0.019	0
YER070W	rnr1Y285A	YOR339C	UBC11	0.95805	0.023	0.99047	0.024	-0.02867	0.023	0
YER070W	rnr1Y285A	YNR008W	LRO1	0.98637	0.003	1.01367	0.017	-0.02864	0.003	0
YER070W	rnr1Y285A	YPL253C	VIK1	1.05913	0.01	1.08384	0.008	-0.02857	0.009	0
YER070W	rnr1Y285A	YBR291C	CTP1	0.9278	0.041	0.95603	0.023	-0.02849	0.041	2e-05
YER070W	rnr1Y285A	YHR047C	AAP1	0.96689	0.013	1.00392	0.032	-0.02848	0.013	6e-05
YER070W	rnr1Y285A	YPL103C	FMP30	1.00487	0.037	1.03314	0.017	-0.02848	0.037	1e-05
YER070W	rnr1Y285A	YAL018C	YAL018C	1.05586	0.021	1.08645	0.008	-0.02846	0.021	0.00014
YER070W	rnr1Y285A	YLR124W	YLR124W	0.95446	0.025	0.98221	0.04	-0.0284	0.025	0
YER070W	rnr1Y285A	YMR209C	YMR209C	0.97507	0.015	0.99821	0.024	-0.02838	0.015	0
YER070W	rnr1Y285A	YDR385W	EFT2	0.80507	0.014	0.82981	0.048	-0.02833	0.014	0
YER070W	rnr1Y285A	YGR050C	YGR050C	0.98481	0.005	1.0165	0.015	-0.02833	0.005	1e-05
YER070W	rnr1Y285A	YOR015W	YOR015W	1.00838	0.015	1.03938	0.027	-0.02828	0.014	0
YER070W	rnr1Y285A	YGR111W	YGR111W	0.98282	0.012	1.01045	0.018	-0.0282	0.012	0
YER070W	rnr1Y285A	YLR061W	RPL22A	0.90688	0.043	0.93465	0.006	-0.02818	0.043	3e-05
YER070W	rnr1Y285A	YGL010W	YGL010W	1.01523	0.02	1.0467	0.008	-0.02815	0.02	0
YER070W	rnr1Y285A	YAL051W	OAF1	0.98154	0.013	1.00939	0.004	-0.02812	0.013	0
YER070W	rnr1Y285A	YBR157C	ICS2	0.96814	0.005	0.99551	0.003	-0.0281	0.005	1e-05
YER070W	rnr1Y285A	YHR151C	MTC6	0.95118	0.015	0.97753	0.018	-0.02809	0.015	0
YER070W	rnr1Y285A	YJR020W	YJR020W	0.95043	0.01	0.97473	0.016	-0.02807	0.01	0
YER070W	rnr1Y285A	YOR225W	YOR225W	0.94953	0.006	0.97555	0.009	-0.02804	0.006	1e-05
YER070W	rnr1Y285A	YLR326W	YLR326W	1.04403	0.01	1.06766	0.03	-0.02801	0.01	0
YER070W	rnr1Y285A	YKL132C	RMA1	1.03504	0.034	1.06207	0.013	-0.02795	0.034	1e-05
YER070W	rnr1Y285A	YBR255W	MTC4	0.9292	0.051	0.96211	0.023	-0.02793	0.051	0.00102
YER070W	rnr1Y285A	YMR148W	OSW5	0.89032	0.03	0.92056	0.036	-0.02788	0.03	1e-05
YER070W	rnr1Y285A	YPR020W	ATP20	0.79013	0.034	0.8161	0.01	-0.02784	0.034	2e-05
YER070W	rnr1Y285A	YGR223C	HSV2	0.97164	0.015	1.00133	0.024	-0.02778	0.015	0
YER070W	rnr1Y285A	YHR194W	MDM31	0.19098	0.015	0.2093	0.062	-0.02778	0.015	0.00207
YER070W	rnr1Y285A	YDL125C	HNT1	0.96954	0.044	0.99523	0.007	-0.02775	0.043	2e-05
YER070W	rnr1Y285A	YNR066C	YNR066C	0.96332	0.034	0.98409	0.038	-0.02765	0.034	1e-05
YER070W	rnr1Y285A	YMR027W	YMR027W	1.10767	0.05	1.14021	0.048	-0.0276	0.05	3e-05
YER070W	rnr1Y285A	YNL057W	YNL057W	0.98863	0.024	1.01627	0.008	-0.02754	0.024	0
YER070W	rnr1Y285A	YIL012W	YIL012W	0.94934	0.004	0.97697	0.004	-0.02749	0.004	1e-05
YER070W	rnr1Y285A	YPL056C	LCL1	0.96814	0.014	0.99533	0.001	-0.02747	0.014	0
YER070W	rnr1Y285A	YGR059W	SPR3	0.96961	0.006	0.99371	0.006	-0.02746	0.006	1e-05
YER070W	rnr1Y285A	YLR294C	YLR294C	0.99875	0.008	1.02473	0.006	-0.02739	0.008	2e-05
YER070W	rnr1Y285A	YPR096C	YPR096C	0.98909	0.058	1.01362	0.005	-0.02739	0.058	5e-05
YER070W	rnr1Y285A	YGR275W	RTT102	0.93827	0.089	0.97088	0.08	-0.02735	0.089	0.00023
YER070W	rnr1Y285A	YOR156C	NFI1	0.93806	0.045	0.96188	0.021	-0.02729	0.045	3e-05
YER070W	rnr1Y285A	YBL057C	PTH2	1.00857	0.04	1.04112	0.01	-0.02729	0.04	2e-05
YER070W	rnr1Y285A	YBR051W	YBR051W	1.06486	0.042	1.09811	0.035	-0.02714	0.042	2e-05
YER070W	rnr1Y285A	YPL247C	YPL247C	1.00578	0.006	1.03382	0.007	-0.02714	0.006	1e-05
YER070W	rnr1Y285A	YPL127C	HHO1	0.99333	0.021	1.02378	0.024	-0.0271	0.021	0
YER070W	rnr1Y285A	YBL085W	BOI1	1.05696	0.043	1.0761	0.047	-0.02709	0.043	2e-05
YER070W	rnr1Y285A	YMR111C	YMR111C	0.95832	0.022	0.98259	0.007	-0.02704	0.022	0
YER070W	rnr1Y285A	YDR233C	RTN1	0.919	0.02	0.94311	0.065	-0.02703	0.02	0
YER070W	rnr1Y285A	YNR044W	AGA1	0.93592	0.011	0.96557	0.03	-0.02703	0.011	4e-05
YER070W	rnr1Y285A	YFL050C	ALR2	1.01522	0.014	1.04321	0.007	-0.02702	0.014	0
YER070W	rnr1Y285A	YHL046C	PAU13	0.97675	0.022	1.00176	0.021	-0.02701	0.022	0
YER070W	rnr1Y285A	YFR019W	FAB1	0.95956	0.022	0.97434	0.041	-0.02699	0.022	0
YER070W	rnr1Y285A	YCL039W	GID7	0.97746	0.007	0.99861	0.022	-0.02698	0.007	0
YER070W	rnr1Y285A	YBR297W	MAL33	1.0018	0.004	1.0271	0.012	-0.02694	0.004	1e-05
YER070W	rnr1Y285A	YBL070C	YBL070C	0.95368	0.024	0.97964	0.011	-0.02693	0.024	0
YER070W	rnr1Y285A	YIL151C	YIL151C	0.94906	0.008	0.97636	0.009	-0.02693	0.008	0
YER070W	rnr1Y285A	YBR015C	MNN2	0.95274	0.074	0.98641	0.029	-0.02691	0.074	0.00013
YER070W	rnr1Y285A	YBR162C	TOS1	1.02371	0.033	1.05236	0.011	-0.02663	0.033	1e-05
YER070W	rnr1Y285A	YLR165C	PUS5	1.05725	0.027	1.08236	0.012	-0.02662	0.027	0
YER070W	rnr1Y285A	YLL063C	AYT1	1.10074	0.009	1.12682	0.006	-0.02653	0.009	0
YER070W	rnr1Y285A	YOR382W	FIT2	1.02312	0.032	1.04556	0.019	-0.02647	0.032	1e-05
YER070W	rnr1Y285A	YIL023C	YKE4	1.0163	0.02	1.04411	0.016	-0.02645	0.02	0
YER070W	rnr1Y285A	YHR126C	ANS1	0.98064	0.009	1.01002	0.013	-0.02638	0.009	0
YER070W	rnr1Y285A	YMR284W	YKU70	0.9532	0.016	0.97962	0.009	-0.0263	0.016	0
YER070W	rnr1Y285A	YHR092C	HXT4	0.97228	0.03	0.9983	0.029	-0.02623	0.03	1e-05
YER070W	rnr1Y285A	YER174C	GRX4	0.97274	0.005	1.0006	0.008	-0.02622	0.005	1e-05
YER070W	rnr1Y285A	YHL039W	EFM1	1.05648	0.006	1.08359	0.009	-0.02621	0.006	0
YER070W	rnr1Y285A	YBL068W	PRS4	0.96903	0.012	0.99656	0.008	-0.02618	0.012	0
YER070W	rnr1Y285A	YLR187W	SKG3	0.98865	0.01	1.01459	0.01	-0.02616	0.01	3e-05
YER070W	rnr1Y285A	YAR044W	YAR044W	0.9417	0.021	0.97026	0.005	-0.02614	0.021	0
YER070W	rnr1Y285A	YPL248C	GAL4	0.96404	0.009	0.99193	0.018	-0.02613	0.009	0
YER070W	rnr1Y285A	YML051W	GAL80	0.98929	0.017	1.01613	0.014	-0.02612	0.017	0
YER070W	rnr1Y285A	YMR234W	RNH1	1.09257	0.029	1.11908	0.01	-0.02607	0.029	1e-05
YER070W	rnr1Y285A	YNL070W	TOM7	0.9581	0.026	0.98338	0.003	-0.02602	0.026	1e-05
YER070W	rnr1Y285A	YCR073C	SSK22	0.98062	0	1.00665	0.007	-0.02601	0	0
YER070W	rnr1Y285A	YIR030C	DCG1	1.02022	0.019	1.04447	0.027	-0.02598	0.019	0
YER070W	rnr1Y285A	YAL062W	GDH3	1.04105	0.007	1.06678	0.006	-0.02592	0.007	1e-05
YER070W	rnr1Y285A	YCL037C	SRO9	0.76884	0.029	0.79391	0.008	-0.02588	0.029	1e-05
YER070W	rnr1Y285A	YMR052C-A	YMR052C-A	0.86191	0.071	0.89698	0.021	-0.02588	0.071	0.00015
YER070W	rnr1Y285A	YNR013C	PHO91	0.97785	0.003	0.99913	0.011	-0.02587	0.003	0
YER070W	rnr1Y285A	YNR012W	URK1	0.96461	0.02	0.99436	0.008	-0.02583	0.02	0.00014
YER070W	rnr1Y285A	YGR209C	TRX2	0.98898	0.012	1.01359	0.02	-0.02582	0.012	0
YER070W	rnr1Y285A	YIL096C	YIL096C	1.05192	0.018	1.07154	0.012	-0.02574	0.018	0.0001
YER070W	rnr1Y285A	YJR061W	YJR061W	0.99757	0.048	1.01724	0.024	-0.02564	0.048	3e-05
YER070W	rnr1Y285A	YLR020C	YEH2	1.03033	0.034	1.05885	0.014	-0.02556	0.034	1e-05
YER070W	rnr1Y285A	YDL130W-A	STF1	0.9953	0.043	1.02691	0.034	-0.02554	0.043	2e-05
YER070W	rnr1Y285A	YOR085W	OST3	0.87854	0.045	0.89938	0.012	-0.02549	0.045	4e-05
YER070W	rnr1Y285A	YGR244C	LSC2	1.11669	0.043	1.14489	0.008	-0.02542	0.043	2e-05
YER070W	rnr1Y285A	YOR235W	YOR235W	0.89267	0.072	0.92232	0.019	-0.02529	0.072	0.00014
YER070W	rnr1Y285A	YLR209C	PNP1	0.9927	0.003	1.01921	0.007	-0.02526	0.003	0
YER070W	rnr1Y285A	YFL052W	YFL052W	0.9637	0.002	0.98981	0.003	-0.02526	0.002	0
YER070W	rnr1Y285A	YOR347C	PYK2	0.98503	0.026	1.00865	0.013	-0.02526	0.026	1e-05
YER070W	rnr1Y285A	YJR008W	MHO1	1.06366	0.011	1.0888	0.01	-0.02512	0.011	0
YER070W	rnr1Y285A	YMR120C	ADE17	0.99186	0.019	1.0164	0.012	-0.0251	0.019	0
YER070W	rnr1Y285A	YDL096C	YDL096C	0.93868	0.005	0.96413	0.016	-0.02504	0.005	1e-05
YER070W	rnr1Y285A	YPL022W	RAD1	0.94909	0.023	0.9733	0.021	-0.02497	0.023	0
YER070W	rnr1Y285A	YOL030W	GAS5	0.98555	0.008	1.00839	0.012	-0.02493	0.008	0
YER070W	rnr1Y285A	YPL198W	RPL7B	0.98021	0.06	1.00092	0.026	-0.02491	0.06	6e-05
YER070W	rnr1Y285A	YKL149C	DBR1	0.95582	0.042	0.97839	0.011	-0.02483	0.042	2e-05
YER070W	rnr1Y285A	YDR384C	ATO3	0.98869	0.015	1.0077	0.031	-0.02482	0.015	0
YER070W	rnr1Y285A	YOR238W	YOR238W	0.98085	0.004	1.00587	0.017	-0.02482	0.004	0
YER070W	rnr1Y285A	YCL022C	YCL022C	0.94496	0.129	0.97545	0.116	-0.02481	0.128	0.00068
YER070W	rnr1Y285A	YGL158W	RCK1	1.03108	0.017	1.05616	0.016	-0.02472	0.017	0
YER070W	rnr1Y285A	YAR023C	YAR023C	1.07203	0.002	1.09856	0.017	-0.02471	0.002	0
YER070W	rnr1Y285A	YHR121W	LSM12	0.99146	0.031	1.01669	0.034	-0.0247	0.031	1e-05
YER070W	rnr1Y285A	YNR058W	BIO3	0.99279	0.003	1.01814	0.002	-0.02469	0.003	0
YER070W	rnr1Y285A	YIL065C	FIS1	0.86547	0.075	0.89335	0.032	-0.02467	0.075	0.00018
YER070W	rnr1Y285A	YKL047W	ANR2	1.00159	0.006	1.0269	0.014	-0.02465	0.006	0
YER070W	rnr1Y285A	YOR186W	YOR186W	0.95362	0.003	0.97954	0.021	-0.02463	0.003	0
YER070W	rnr1Y285A	YFL004W	VTC2	1.043	0.01	1.06576	0.022	-0.02461	0.01	0
YER070W	rnr1Y285A	YOR124C	UBP2	0.87012	0.038	0.89522	0.024	-0.0246	0.038	2e-05
YER070W	rnr1Y285A	YGR071C	ENV11	1.00767	0.012	1.03359	0.019	-0.02454	0.012	0
YER070W	rnr1Y285A	YMR279C	YMR279C	1.04976	0.014	1.07134	0.043	-0.02453	0.014	6e-05
YER070W	rnr1Y285A	YIL085C	KTR7	0.99267	0.004	1.01368	0.013	-0.02452	0.004	0
YER070W	rnr1Y285A	YKL202W	YKL202W	1.01638	0.017	1.04197	0.016	-0.02441	0.017	0
YER070W	rnr1Y285A	YIR029W	DAL2	1.06621	0.025	1.08689	0.021	-0.02437	0.025	0
YER070W	rnr1Y285A	YGR176W	YGR176W	1.01739	0.034	1.04373	0.022	-0.02436	0.034	1e-05
YER070W	rnr1Y285A	YMR253C	YMR253C	1.01475	0.021	1.04002	0.012	-0.02411	0.021	0
YER070W	rnr1Y285A	YOR376W	YOR376W	0.98871	0.027	1.0122	0.007	-0.02406	0.027	1e-05
YER070W	rnr1Y285A	YPR195C	YPR195C	0.96934	0.008	0.99338	0.013	-0.024	0.008	0
YER070W	rnr1Y285A	YGR287C	IMA1	0.95171	0.005	0.97522	0.019	-0.02394	0.005	1e-05
YER070W	rnr1Y285A	YIL113W	SDP1	0.92052	0.031	0.9435	0.061	-0.02394	0.031	1e-05
YER070W	rnr1Y285A	YGL231C	EMC4	1.00433	0.012	1.0332	0.03	-0.02388	0.012	0
YER070W	rnr1Y285A	YCR020C	PET18	1.01306	0.013	1.03299	0.011	-0.02387	0.013	0
YER070W	rnr1Y285A	YGR117C	YGR117C	0.95312	0.006	0.97699	0.011	-0.02387	0.006	1e-05
YER070W	rnr1Y285A	YLR111W	YLR111W	0.88255	0.032	0.90842	0.009	-0.02386	0.032	1e-05
YER070W	rnr1Y285A	YDL238C	GUD1	1.04383	0.013	1.06493	0.017	-0.02386	0.013	0
YER070W	rnr1Y285A	YKL198C	PTK1	0.95254	0.006	0.97656	0.017	-0.02379	0.006	0
YER070W	rnr1Y285A	YHR097C	YHR097C	1.01895	0.015	1.03813	0.016	-0.02376	0.015	0
YER070W	rnr1Y285A	YMR252C	YMR252C	0.98265	0.013	1.0088	0.013	-0.02376	0.013	0
YER070W	rnr1Y285A	YIL111W	COX5B	0.99758	0.046	1.01793	0.013	-0.02376	0.046	3e-05
YER070W	rnr1Y285A	YJL106W	IME2	1.00595	0.015	1.02945	0.005	-0.02375	0.015	0
YER070W	rnr1Y285A	YAL049C	AIM2	0.99105	0.002	1.01472	0.002	-0.02374	0.002	0
YER070W	rnr1Y285A	YBR085W	AAC3	0.94573	0.028	0.97009	0.008	-0.02374	0.028	1e-05
YER070W	rnr1Y285A	YNL083W	SAL1	0.99499	0.01	1.01763	0.014	-0.02368	0.01	0
YER070W	rnr1Y285A	YNL146W	YNL146W	1.00434	0.034	1.02184	0.016	-0.02368	0.034	1e-05
YER070W	rnr1Y285A	YDR093W	DNF2	0.98149	0.044	1.00188	0.015	-0.02368	0.044	2e-05
YER070W	rnr1Y285A	YJL153C	INO1	0.99427	0.012	1.01805	0.015	-0.02368	0.012	5e-05
YER070W	rnr1Y285A	YLR267W	BOP2	0.98933	0.013	1.01132	0.004	-0.02366	0.013	0
YER070W	rnr1Y285A	YJL187C	SWE1	0.60214	0.249	0.63227	0.172	-0.02352	0.249	0.01692
YER070W	rnr1Y285A	YBR184W	YBR184W	0.97331	0.014	0.9996	0.017	-0.02348	0.014	0
YER070W	rnr1Y285A	YMR304C-A	YMR304C-A	0.95978	0.018	0.99669	0.046	-0.02347	0.018	0
YER070W	rnr1Y285A	YLR134W	PDC5	0.95758	0.018	0.97611	0.025	-0.02346	0.018	0
YER070W	rnr1Y285A	YPL135W	ISU1	0.98713	0.018	1.01131	0.018	-0.02343	0.018	0
YER070W	rnr1Y285A	YNL107W	YAF9	0.92377	0.014	0.94712	0.009	-0.02342	0.014	0
YER070W	rnr1Y285A	YLR346C	YLR346C	0.9395	0.066	0.97554	0.046	-0.0234	0.066	0.0001
YER070W	rnr1Y285A	YJR052W	RAD7	0.98645	0.005	1.0132	0.013	-0.0234	0.005	0
YER070W	rnr1Y285A	YJL051W	IRC8	1.07276	0.027	1.10016	0.036	-0.02339	0.027	0
YER070W	rnr1Y285A	YBR041W	FAT1	1.00292	0.021	1.02644	0.004	-0.02334	0.021	0
YER070W	rnr1Y285A	YNR001C	CIT1	1.02591	0.019	1.04818	0.008	-0.02332	0.019	0
YER070W	rnr1Y285A	YJL084C	ALY2	0.9152	0.027	0.92689	0.073	-0.0232	0.027	0.0003
YER070W	rnr1Y285A	YLR180W	SAM1	1.03028	0.07	1.05016	0.062	-0.02317	0.07	9e-05
YER070W	rnr1Y285A	YIL050W	PCL7	0.95626	0.008	0.98178	0.006	-0.02308	0.008	0
YER070W	rnr1Y285A	YMR044W	IOC4	1.06176	0.038	1.09421	0.022	-0.02304	0.038	1e-05
YER070W	rnr1Y285A	YMR107W	SPG4	1.01314	0.019	1.03275	0.019	-0.02303	0.019	0
YER070W	rnr1Y285A	YJR021C	REC107	0.95995	0.003	0.9838	0.008	-0.02296	0.003	0
YER070W	rnr1Y285A	YMR264W	CUE1	1.03242	0.025	1.05672	0.043	-0.02292	0.025	0
YER070W	rnr1Y285A	YGL109W	YGL109W	1.00353	0.032	1.02594	0.026	-0.02292	0.032	1e-05
YER070W	rnr1Y285A	YBL029W	YBL029W	1.01032	0.026	1.03487	0.026	-0.02282	0.026	0
YER070W	rnr1Y285A	YLR380W	CSR1	1.03057	0.026	1.03863	0.041	-0.0228	0.026	0
YER070W	rnr1Y285A	YBR199W	KTR4	1.00144	0.012	1.02475	0.005	-0.02276	0.012	0
YER070W	rnr1Y285A	YNL001W	DOM34	0.96335	0.013	0.98573	0.003	-0.02274	0.013	0
YER070W	rnr1Y285A	YDR216W	ADR1	0.98721	0.028	1.00708	0.026	-0.02274	0.028	1e-05
YER070W	rnr1Y285A	YHR008C	SOD2	0.88652	0.077	0.91024	0.028	-0.02274	0.077	0.00018
YER070W	rnr1Y285A	YDR305C	HNT2	0.9602	0.038	0.98073	0.028	-0.02271	0.038	2e-05
YER070W	rnr1Y285A	YLL001W	DNM1	0.96724	0.019	0.98075	0.048	-0.02268	0.019	0
YER070W	rnr1Y285A	YGR281W	YOR1	0.96487	0.009	0.97932	0.033	-0.02266	0.009	3e-05
YER070W	rnr1Y285A	YLR237W	THI7	0.92376	0.024	0.94895	0.008	-0.02264	0.024	1e-05
YER070W	rnr1Y285A	YBR275C	RIF1	0.97292	0.016	0.99556	0.026	-0.02261	0.016	0
YER070W	rnr1Y285A	YLL028W	TPO1	0.95935	0.014	0.98147	0.003	-0.02253	0.014	0
YER070W	rnr1Y285A	YPR111W	DBF20	0.9527	0.018	0.97681	0.004	-0.02249	0.018	0
YER070W	rnr1Y285A	YOR028C	CIN5	0.9849	0.023	1.01242	0.013	-0.02246	0.023	0
YER070W	rnr1Y285A	YHR028C	DAP2	0.97104	0.011	0.99622	0.013	-0.02244	0.011	4e-05
YER070W	rnr1Y285A	YNR014W	YNR014W	1.07191	0.034	1.09247	0.023	-0.02243	0.034	1e-05
YER070W	rnr1Y285A	YJL206C	YJL206C	0.9701	0.059	0.99564	0.043	-0.02243	0.059	6e-05
YER070W	rnr1Y285A	YLR001C	YLR001C	0.97818	0.02	1.00755	0.026	-0.02238	0.02	0
YER070W	rnr1Y285A	YKL039W	PTM1	0.97519	0.008	0.98871	0.047	-0.02231	0.008	0
YER070W	rnr1Y285A	YMR283C	RIT1	1.09561	0.026	1.11265	0.024	-0.02231	0.026	0
YER070W	rnr1Y285A	YOL073C	YOL073C	1.02508	0.009	1.04233	0.022	-0.02225	0.009	0
YER070W	rnr1Y285A	YJR127C	RSF2	0.92615	0.001	0.94824	0.001	-0.02224	0.001	0
YER070W	rnr1Y285A	YOR118W	RTC5	0.93398	0.003	0.95648	0.037	-0.02224	0.003	0
YER070W	rnr1Y285A	YNR048W	YNR048W	1.02796	0.02	1.05541	0.009	-0.02223	0.02	0
YER070W	rnr1Y285A	YDR007W	TRP1	0.93737	0.038	0.95293	0.018	-0.02223	0.038	2e-05
YER070W	rnr1Y285A	YPL216W	YPL216W	1.00758	0.019	1.02937	0.017	-0.02223	0.019	0
YER070W	rnr1Y285A	YDR422C	SIP1	0.92613	0.01	0.94846	0.015	-0.0222	0.01	4e-05
YER070W	rnr1Y285A	YIL137C	TMA108	0.95075	0.022	0.97524	0.015	-0.02216	0.022	0
YER070W	rnr1Y285A	YKR080W	MTD1	0.98821	0.015	1.00025	0.051	-0.02208	0.015	0
YER070W	rnr1Y285A	YDR156W	RPA14	0.91691	0.009	0.93939	0.021	-0.02205	0.009	3e-05
YER070W	rnr1Y285A	YDR124W	YDR124W	1.03188	0.019	1.05261	0.01	-0.022	0.019	0
YER070W	rnr1Y285A	YPL036W	PMA2	0.71563	0.122	0.74891	0.127	-0.022	0.122	0.00133
YER070W	rnr1Y285A	YNL009W	IDP3	1.10732	0.026	1.13429	0.026	-0.02194	0.026	0
YER070W	rnr1Y285A	YPL232W	SSO1	0.97277	0.004	0.99981	0.02	-0.02192	0.004	1e-05
YER070W	rnr1Y285A	YBR220C	YBR220C	1.00385	0.027	1.02653	0.017	-0.02191	0.027	1e-05
YER070W	rnr1Y285A	YGR123C	PPT1	0.99909	0.027	1.02027	0.017	-0.02185	0.027	1e-05
YER070W	rnr1Y285A	YKR019C	IRS4	0.88226	0.025	0.90571	0.009	-0.02183	0.025	1e-05
YER070W	rnr1Y285A	YPR155C	NCA2	0.97527	0.011	0.99478	0.011	-0.0218	0.011	0
YER070W	rnr1Y285A	YLR082C	SRL2	0.99525	0.111	1.01047	0.132	-0.02179	0.111	0.00038
YER070W	rnr1Y285A	YHR137W	ARO9	1.05305	0.007	1.07044	0.025	-0.02175	0.007	1e-05
YER070W	rnr1Y285A	YDR534C	FIT1	0.94638	0.027	0.96923	0.025	-0.02175	0.027	1e-05
YER070W	rnr1Y285A	YCR030C	SYP1	1.02525	0.006	1.0459	0.008	-0.02163	0.006	1e-05
YER070W	rnr1Y285A	YDR469W	SDC1	0.82896	0.012	0.85414	0.023	-0.02163	0.012	0
YER070W	rnr1Y285A	YCR089W	FIG2	0.94217	0.021	0.96318	0.026	-0.0216	0.021	0
YER070W	rnr1Y285A	YJL060W	BNA3	0.95863	0.025	0.97085	0.028	-0.02159	0.025	0
YER070W	rnr1Y285A	YMR087W	YMR087W	0.93274	0.005	0.94867	0.032	-0.02158	0.005	1e-05
YER070W	rnr1Y285A	YLR216C	CPR6	1.07881	0.004	1.09801	0.01	-0.02156	0.004	0
YER070W	rnr1Y285A	YOR170W	YOR170W	1.0207	0.023	1.03997	0.026	-0.02155	0.023	0
YER070W	rnr1Y285A	YFR039C	YFR039C	0.95282	0.04	0.96561	0.025	-0.02152	0.04	2e-05
YER070W	rnr1Y285A	YGR221C	TOS2	0.95003	0.005	0.9698	0.004	-0.02144	0.005	1e-05
YER070W	rnr1Y285A	YNL108C	YNL108C	0.99799	0.013	1.01901	0.004	-0.02139	0.013	0
YER070W	rnr1Y285A	YNR006W	VPS27	0.37168	0.1	0.40464	0.057	-0.02139	0.1	0.00508
YER070W	rnr1Y285A	YKL068W	NUP100	0.96881	0.014	0.998	0.027	-0.02135	0.014	0
YER070W	rnr1Y285A	YDR408C	ADE8	1.04497	0.008	1.06334	0.012	-0.02135	0.008	0
YER070W	rnr1Y285A	YJL212C	OPT1	1.00693	0.007	1.03361	0.017	-0.02133	0.007	2e-05
YER070W	rnr1Y285A	YLR099C	ICT1	1.03306	0.026	1.04675	0.027	-0.02129	0.026	0
YER070W	rnr1Y285A	YHR140W	YHR140W	1.01196	0.007	1.03143	0.019	-0.02128	0.007	0
YER070W	rnr1Y285A	YLR036C	YLR036C	1.04066	0.004	1.06106	0.017	-0.02111	0.004	1e-05
YER070W	rnr1Y285A	YFR055W	IRC7	0.98898	0.006	1.00904	0.009	-0.02111	0.006	0
YER070W	rnr1Y285A	YOR214C	YOR214C	0.99029	0.021	1.0099	0.004	-0.02097	0.021	0
YER070W	rnr1Y285A	YMR307W	GAS1	1.0249	0.016	1.043	0.021	-0.02085	0.016	0
YER070W	rnr1Y285A	YDR191W	HST4	1.0073	0.021	1.02783	0.006	-0.02074	0.021	0
YER070W	rnr1Y285A	YHR180W	YHR180W	0.5933	0.047	0.61821	0.007	-0.02073	0.047	0.00014
YER070W	rnr1Y285A	YMR057C	YMR057C	0.99371	0.008	1.01897	0.025	-0.02073	0.007	0
YER070W	rnr1Y285A	YPL249C	GYP5	1.04085	0.006	1.06095	0.025	-0.02072	0.006	1e-05
YER070W	rnr1Y285A	YMR187C	YMR187C	0.9803	0.001	1.00358	0.018	-0.02071	0.001	0
YER070W	rnr1Y285A	YJL133W	MRS3	0.96239	0.026	0.98248	0.002	-0.02068	0.026	1e-05
YER070W	rnr1Y285A	YLR206W	ENT2	0.99665	0.017	1.02178	0.035	-0.02067	0.017	9e-05
YER070W	rnr1Y285A	YDR130C	FIN1	0.99399	0.015	1.01475	0.039	-0.02067	0.015	0
YER070W	rnr1Y285A	YDR169C	STB3	0.92967	0.113	0.96952	0.097	-0.02067	0.112	0.00048
YER070W	rnr1Y285A	YDL091C	UBX3	0.95479	0.055	0.96912	0.021	-0.02064	0.055	5e-05
YER070W	rnr1Y285A	YPR039W	YPR039W	1.00121	0.036	1.01661	0.022	-0.02061	0.036	1e-05
YER070W	rnr1Y285A	YLR366W	YLR366W	0.93946	0.013	0.9575	0.017	-0.02057	0.013	0
YER070W	rnr1Y285A	YDL201W	TRM8	0.98182	0.015	1.00207	0.007	-0.02055	0.015	0
YER070W	rnr1Y285A	YPL269W	KAR9	1.04317	0.018	1.06822	0.028	-0.02055	0.018	0
YER070W	rnr1Y285A	YPR173C	VPS4	0.50714	0.014	0.51963	0.027	-0.02054	0.014	0.00024
YER070W	rnr1Y285A	YHL028W	WSC4	0.95536	0.003	0.98004	0.03	-0.02053	0.003	0
YER070W	rnr1Y285A	YLL016W	SDC25	1.00071	0.009	1.0183	0.012	-0.0204	0.009	0
YER070W	rnr1Y285A	YLL060C	GTT2	1.01334	0.013	1.03199	0.006	-0.02036	0.013	0
YER070W	rnr1Y285A	YPR149W	NCE102	1.00668	0.019	1.02773	0.011	-0.02032	0.019	0
YER070W	rnr1Y285A	YPR008W	HAA1	1.01337	0.021	1.03144	0.012	-0.0203	0.021	0
YER070W	rnr1Y285A	YAL028W	FRT2	1.00394	0.004	1.02519	0.013	-0.02025	0.004	1e-05
YER070W	rnr1Y285A	YML037C	YML037C	1.09084	0.022	1.11012	0.007	-0.02022	0.022	0
YER070W	rnr1Y285A	YFL046W	FMP32	0.99208	0.018	1.01308	0.016	-0.02021	0.018	0
YER070W	rnr1Y285A	YKL191W	DPH2	0.94209	0.014	0.97271	0.034	-0.0202	0.014	0
YER070W	rnr1Y285A	YPR068C	HOS1	1.08707	0.009	1.11327	0.029	-0.02017	0.009	0
YER070W	rnr1Y285A	YOR010C	TIR2	0.9687	0.013	0.98984	0.002	-0.02016	0.013	0
YER070W	rnr1Y285A	YNL097C	PHO23	0.99305	0.005	1.0125	0.018	-0.02016	0.005	1e-05
YER070W	rnr1Y285A	YLR146C	SPE4	0.92876	0.029	0.95322	0.043	-0.02012	0.029	1e-05
YER070W	rnr1Y285A	YOR086C	TCB1	0.95751	0.047	0.98121	0.063	-0.02009	0.047	3e-05
YER070W	rnr1Y285A	YKL077W	YKL077W	1.08134	0.007	1.0963	0.031	-0.02007	0.007	1e-05
YER070W	rnr1Y285A	YML011C	RAD33	0.8985	0.07	0.9382	0.079	-0.02005	0.07	0.002
YER070W	rnr1Y285A	YKL215C	OXP1	0.9792	0.008	0.99503	0.024	-0.02001	0.008	0
YER070W	rnr1Y285A	YPL057C	SUR1	0.84851	0.009	0.8686	0.004	-0.02	0.009	0
YER070W	rnr1Y285A	YJL196C	ELO1	0.96834	0.006	0.99273	0.017	-0.01998	0.006	1e-05
YER070W	rnr1Y285A	YLR205C	HMX1	0.96676	0.025	0.97205	0.151	-0.01995	0.025	0
YER070W	rnr1Y285A	YKL073W	LHS1	0.93909	0.008	0.96101	0.012	-0.01993	0.008	2e-05
YER070W	rnr1Y285A	YLR432W	IMD3	0.97424	0.026	0.99292	0.018	-0.01993	0.026	1e-05
YER070W	rnr1Y285A	YBR208C	DUR1	1.00819	0.009	1.02565	0.016	-0.01989	0.009	0
YER070W	rnr1Y285A	YGR121C	MEP1	0.99974	0.025	1.01882	0.02	-0.01988	0.025	0
YER070W	rnr1Y285A	YDL184C	RPL41A	0.90336	0.043	0.93542	0.062	-0.01986	0.043	3e-05
YER070W	rnr1Y285A	YDR452W	PPN1	1.05878	0.013	1.07411	0.028	-0.01982	0.013	0
YER070W	rnr1Y285A	YMR041C	ARA2	0.99287	0.055	0.99027	0.094	-0.01979	0.055	0.00102
YER070W	rnr1Y285A	YMR259C	TRM732	1.01816	0.016	1.03997	0.014	-0.01977	0.016	0
YER070W	rnr1Y285A	YGR017W	YGR017W	0.96705	0.012	0.98375	0.013	-0.01975	0.012	0
YER070W	rnr1Y285A	YBR108W	AIM3	1.05416	0.018	1.07572	0.01	-0.01974	0.018	0
YER070W	rnr1Y285A	YKR052C	MRS4	0.98813	0.002	1.00543	0.021	-0.01973	0.002	0
YER070W	rnr1Y285A	YOR220W	RCN2	0.97629	0.013	0.99361	0.036	-0.01971	0.013	0
YER070W	rnr1Y285A	YJR014W	TMA22	0.9629	0.054	0.97544	0.037	-0.0197	0.054	5e-05
YER070W	rnr1Y285A	YCR059C	YIH1	1.03661	0.085	1.05545	0.002	-0.01966	0.085	0.00015
YER070W	rnr1Y285A	YBR145W	ADH5	1.00193	0.017	1.02453	0.019	-0.01961	0.017	0
YER070W	rnr1Y285A	YBR128C	ATG14	0.97647	0.014	0.99641	0.001	-0.0196	0.014	0
YER070W	rnr1Y285A	YML117W	NAB6	1.01028	0.017	1.03164	0.005	-0.0196	0.017	0
YER070W	rnr1Y285A	YLR188W	MDL1	0.94523	0.036	0.9605	0.027	-0.01956	0.036	2e-05
YER070W	rnr1Y285A	YBL098W	BNA4	0.95963	0.016	0.97972	0.004	-0.01952	0.016	0
YER070W	rnr1Y285A	YBR161W	CSH1	1.06998	0.005	1.0912	0.006	-0.01947	0.005	1e-05
YER070W	rnr1Y285A	YKL160W	ELF1	0.98655	0.011	0.99852	0.035	-0.01943	0.011	4e-05
YER070W	rnr1Y285A	YKL123W	YKL123W	1.01418	0.02	1.03288	0.02	-0.01942	0.02	0
YER070W	rnr1Y285A	YBR006W	UGA2	0.99345	0.018	1.01685	0.012	-0.01941	0.018	0
YER070W	rnr1Y285A	YBR075W	YBR075W	0.99464	0.015	1.01341	0.002	-0.01937	0.015	0
YER070W	rnr1Y285A	YJR040W	GEF1	0.95545	0.017	0.97366	0.003	-0.01936	0.017	0
YER070W	rnr1Y285A	YLR429W	CRN1	1.00851	0.045	1.02885	0.033	-0.01935	0.045	2e-05
YER070W	rnr1Y285A	YKR011C	YKR011C	1.04096	0.006	1.05744	0.018	-0.01929	0.006	1e-05
YER070W	rnr1Y285A	YJL037W	IRC18	0.96756	0.09	0.98248	0.032	-0.01929	0.089	0.00022
YER070W	rnr1Y285A	YKL097C	YKL097C	1.01917	0.001	1.03961	0.014	-0.01927	0.001	0
YER070W	rnr1Y285A	YML117W-A	YML117W-A	1.03028	0.032	1.04965	0.001	-0.01924	0.032	1e-05
YER070W	rnr1Y285A	YJL164C	TPK1	0.84463	0.128	0.87085	0.03	-0.01924	0.128	0.00093
YER070W	rnr1Y285A	YGL156W	AMS1	0.98932	0.004	1.00936	0.015	-0.01923	0.004	0
YER070W	rnr1Y285A	YMR147W	YMR147W	0.98155	0.05	1.01401	0.057	-0.01917	0.05	4e-05
YER070W	rnr1Y285A	YDR162C	NBP2	0.64185	0.054	0.6616	0.009	-0.01913	0.054	0.00016
YER070W	rnr1Y285A	YNL074C	MLF3	0.94002	0.003	0.9611	0.016	-0.01911	0.003	0
YER070W	rnr1Y285A	YGL108C	YGL108C	0.99975	0.007	1.01431	0.019	-0.0191	0.007	0
YER070W	rnr1Y285A	YML090W	YML090W	0.86833	0.011	0.88622	0.004	-0.01907	0.011	0
YER070W	rnr1Y285A	YNR042W	YNR042W	1.00098	0.002	1.02192	0.002	-0.01906	0.002	0
YER070W	rnr1Y285A	YJR043C	POL32	0.97129	0.008	0.98793	0.009	-0.01903	0.008	0
YER070W	rnr1Y285A	YBR104W	YMC2	0.94671	0.02	0.96074	0.015	-0.01901	0.02	0
YER070W	rnr1Y285A	YDR005C	MAF1	0.83227	0.072	0.86467	0.044	-0.01896	0.072	0.00018
YER070W	rnr1Y285A	YPL003W	ULA1	0.97067	0.014	0.99092	0.009	-0.01896	0.014	0
YER070W	rnr1Y285A	YJR135C	MCM22	0.98583	0.034	1.00528	0.029	-0.01887	0.034	1e-05
YER070W	rnr1Y285A	YLR445W	GMC2	1.00376	0.031	1.02778	0.025	-0.01887	0.031	1e-05
YER070W	rnr1Y285A	YML076C	WAR1	0.98261	0.026	1.00033	0.007	-0.01887	0.026	0
YER070W	rnr1Y285A	YLR283W	YLR283W	0.9699	0.009	0.98655	0.019	-0.01883	0.009	0
YER070W	rnr1Y285A	YLR043C	TRX1	1.02751	0.022	1.04641	0.021	-0.01879	0.022	0
YER070W	rnr1Y285A	YBR224W	YBR224W	0.90664	0.015	0.92697	0.035	-0.01877	0.015	9e-05
YER070W	rnr1Y285A	YOL015W	IRC10	0.94323	0.003	0.9614	0.043	-0.01864	0.003	0
YER070W	rnr1Y285A	YDR374C	YDR374C	0.98134	0.027	1.00004	0.014	-0.01863	0.027	1e-05
YER070W	rnr1Y285A	YDL079C	MRK1	0.94863	0.049	0.96433	0.019	-0.01857	0.049	4e-05
YER070W	rnr1Y285A	YGR089W	NNF2	0.97643	0.02	0.99349	0.021	-0.0185	0.02	0
YER070W	rnr1Y285A	YLR015W	BRE2	0.77442	0.025	0.79279	0.031	-0.01846	0.025	1e-05
YER070W	rnr1Y285A	YNL085W	MKT1	0.99919	0.012	1.02023	0.011	-0.01845	0.012	0
YER070W	rnr1Y285A	YMR092C	AIP1	0.97053	0.016	0.98821	0.018	-0.01841	0.016	0
YER070W	rnr1Y285A	YJL093C	TOK1	0.98431	0.041	1.00661	0.017	-0.01841	0.041	2e-05
YER070W	rnr1Y285A	YDR332W	IRC3	0.97444	0.012	0.99179	0.018	-0.01831	0.012	0
YER070W	rnr1Y285A	YGR126W	YGR126W	0.97244	0.001	0.98853	0.005	-0.01829	0.001	0
YER070W	rnr1Y285A	YMR144W	YMR144W	0.92228	0.028	0.94226	0.018	-0.01822	0.028	1e-05
YER070W	rnr1Y285A	YDR493W	MZM1	0.99867	0.006	0.99965	0.041	-0.01822	0.006	1e-05
YER070W	rnr1Y285A	YOL063C	CRT10	1.01285	0.009	1.03381	0.003	-0.01818	0.009	0
YER070W	rnr1Y285A	YDR536W	STL1	1.05955	0.042	1.07031	0.021	-0.01814	0.042	2e-05
YER070W	rnr1Y285A	YGL002W	ERP6	0.95957	0.017	0.98038	0.027	-0.0181	0.017	0
YER070W	rnr1Y285A	YPR126C	YPR126C	1.01204	0.014	1.02691	0.007	-0.0181	0.014	0
YER070W	rnr1Y285A	YOR024W	YOR024W	1.04031	0.012	1.06324	0.016	-0.01809	0.012	0
YER070W	rnr1Y285A	YHR022C	YHR022C	0.96044	0.027	0.98025	0.013	-0.01807	0.027	1e-05
YER070W	rnr1Y285A	YDR345C	HXT3	0.98356	0.009	0.99515	0.019	-0.01803	0.009	0
YER070W	rnr1Y285A	YGL148W	ARO2	0.84301	0.021	0.87072	0.058	-0.018	0.021	0.00021
YER070W	rnr1Y285A	YLR405W	DUS4	0.92777	0.035	0.93786	0.026	-0.01795	0.035	2e-05
YER070W	rnr1Y285A	YBR020W	GAL1	1.04338	0.019	1.0668	0.027	-0.01794	0.019	0
YER070W	rnr1Y285A	YNR057C	BIO4	0.98615	0.001	1.00557	0.017	-0.01792	0.001	0
YER070W	rnr1Y285A	YKR010C	TOF2	1.00374	0.019	1.0244	0.022	-0.01788	0.019	0
YER070W	rnr1Y285A	YMR306C-A	YMR306C-A	1.04945	0.04	1.068	0.017	-0.01788	0.04	2e-05
YER070W	rnr1Y285A	YGL202W	ARO8	0.94482	0.041	0.95237	0.041	-0.01786	0.041	2e-05
YER070W	rnr1Y285A	YLR178C	TFS1	1.06228	0.029	1.07269	0.024	-0.01784	0.029	0.00024
YER070W	rnr1Y285A	YIL087C	AIM19	0.97698	0.005	0.99414	0.005	-0.01783	0.005	1e-05
YER070W	rnr1Y285A	YOR184W	SER1	0.93125	0.039	0.9489	0.012	-0.01773	0.039	2e-05
YER070W	rnr1Y285A	YOL153C	YOL153C	0.96164	0.03	0.98304	0.026	-0.01772	0.03	1e-05
YER070W	rnr1Y285A	YPR023C	EAF3	0.84313	0.01	0.86142	0.031	-0.01768	0.01	5e-05
YER070W	rnr1Y285A	YIL158W	AIM20	1.00747	0.007	1.02656	0.012	-0.01765	0.007	0
YER070W	rnr1Y285A	YKL220C	FRE2	0.99073	0.028	1.00511	0.019	-0.01761	0.028	1e-05
YER070W	rnr1Y285A	YPL116W	HOS3	0.94865	0.001	0.96697	0.002	-0.0176	0.001	0
YER070W	rnr1Y285A	YBR032W	YBR032W	0.95279	0.025	0.96852	0.024	-0.01756	0.025	0
YER070W	rnr1Y285A	YLR018C	POM34	1.01989	0.012	1.03566	0.021	-0.01755	0.012	0
YER070W	rnr1Y285A	YOL086C	ADH1	0.98112	0.024	0.99528	0.013	-0.01753	0.024	0
YER070W	rnr1Y285A	YDR122W	KIN1	1.02062	0.005	1.03784	0.004	-0.0175	0.005	0
YER070W	rnr1Y285A	YBR172C	SMY2	0.94046	0.019	0.95708	0.008	-0.0175	0.019	0
YER070W	rnr1Y285A	YGL006W	PMC1	1.03257	0.03	1.05914	0.036	-0.01748	0.03	1e-05
YER070W	rnr1Y285A	YHR123W	EPT1	1.0269	0.05	1.04159	0.031	-0.0174	0.05	3e-05
YER070W	rnr1Y285A	YNR073C	YNR073C	1.07169	0.001	1.09345	0.018	-0.01734	0.001	0
YER070W	rnr1Y285A	YOR084W	LPX1	0.94703	0.011	0.96449	0.017	-0.01733	0.011	0
YER070W	rnr1Y285A	YLR348C	DIC1	1.00236	0.015	1.02684	0.031	-0.0173	0.015	7e-05
YER070W	rnr1Y285A	YPR200C	ARR2	1.03032	0.018	1.0586	0.04	-0.01729	0.018	0
YER070W	rnr1Y285A	YMR163C	INP2	0.9284	0.003	0.95219	0.018	-0.01727	0.003	0
YER070W	rnr1Y285A	YCL024W	KCC4	0.86861	0.07	0.89378	0.116	-0.01721	0.07	0.00014
YER070W	rnr1Y285A	YAL002W	VPS8	0.77194	0.009	0.79235	0.012	-0.0172	0.009	5e-05
YER070W	rnr1Y285A	YOR221C	MCT1	0.78613	0.017	0.80712	0.022	-0.01716	0.017	0
YER070W	rnr1Y285A	YLR056W	ERG3	0.83594	0.017	0.85705	0.019	-0.01714	0.017	0
YER070W	rnr1Y285A	YGL162W	SUT1	0.98122	0.003	1.0036	0.029	-0.01704	0.003	0
YER070W	rnr1Y285A	YNL092W	YNL092W	1.0039	0.017	1.02107	0.014	-0.01699	0.017	0
YER070W	rnr1Y285A	YBL036C	YBL036C	0.99132	0.005	1.00482	0.024	-0.01698	0.005	1e-05
YER070W	rnr1Y285A	YLR461W	PAU4	0.98974	0.028	1.00903	0.021	-0.01696	0.028	1e-05
YER070W	rnr1Y285A	YDR277C	MTH1	0.98447	0.037	1.00114	0.02	-0.01695	0.037	1e-05
YER070W	rnr1Y285A	YGR144W	THI4	0.97988	0.01	0.99914	0.013	-0.01689	0.01	0
YER070W	rnr1Y285A	YCL026C	YCL026C	1.05447	0.018	1.06903	0.004	-0.01688	0.018	0
YER070W	rnr1Y285A	YKR023W	YKR023W	0.99779	0.022	1.00021	0.049	-0.01687	0.022	0
YER070W	rnr1Y285A	YNR045W	PET494	0.98338	0.004	1.00061	0.029	-0.01683	0.004	0
YER070W	rnr1Y285A	YKR096W	ESL2	1.04911	0.01	1.06539	0.011	-0.01677	0.01	0
YER070W	rnr1Y285A	YLR170C	APS1	1.00954	0.02	1.02502	0.057	-0.01665	0.02	0
YER070W	rnr1Y285A	YDR279W	RNH202	0.98919	0.003	1.00189	0.028	-0.01662	0.003	0
YER070W	rnr1Y285A	YPL241C	CIN2	1.00198	0.015	1.02	0.003	-0.01662	0.015	0
YER070W	rnr1Y285A	YGL079W	KXD1	1.02779	0.061	1.0438	0.005	-0.01653	0.061	6e-05
YER070W	rnr1Y285A	YPL182C	YPL182C	1.05215	0.023	1.07066	0.013	-0.01652	0.023	0
YER070W	rnr1Y285A	YGL144C	ROG1	0.97442	0.017	0.99036	0.003	-0.01646	0.017	0
YER070W	rnr1Y285A	YLR280C	YLR280C	1.00886	0.039	1.03387	0.053	-0.01644	0.039	2e-05
YER070W	rnr1Y285A	YDL085W	NDE2	1.00858	0.021	1.02261	0.004	-0.01638	0.021	0
YER070W	rnr1Y285A	YLR080W	EMP46	1.00332	0.06	1.02338	0.007	-0.01637	0.06	6e-05
YER070W	rnr1Y285A	YPL091W	GLR1	1.01832	0.013	1.03543	0.005	-0.01637	0.013	0
YER070W	rnr1Y285A	YDR436W	PPZ2	1.04777	0.008	1.06338	0.007	-0.01636	0.008	2e-05
YER070W	rnr1Y285A	YLR123C	YLR123C	0.95381	0.036	0.97168	0.005	-0.01634	0.036	1e-05
YER070W	rnr1Y285A	YOR277C	YOR277C	0.92761	0.008	0.94613	0.023	-0.01634	0.008	0
YER070W	rnr1Y285A	YPL008W	CHL1	0.97568	0.004	0.9934	0.003	-0.01633	0.004	0
YER070W	rnr1Y285A	YGR096W	TPC1	1.01806	0.036	1.03278	0.013	-0.01632	0.036	1e-05
YER070W	rnr1Y285A	YGR142W	BTN2	0.92481	0.038	0.9439	0.026	-0.01631	0.038	2e-05
YER070W	rnr1Y285A	YIL124W	AYR1	0.99258	0.016	1.00897	0.003	-0.01629	0.016	0
YER070W	rnr1Y285A	YBR216C	YBP1	0.96998	0.021	0.98322	0.014	-0.01615	0.021	0
YER070W	rnr1Y285A	YMR096W	SNZ1	0.90166	0.01	0.91233	0.033	-0.01613	0.01	0
YER070W	rnr1Y285A	YLR284C	ECI1	1.02553	0.017	1.03694	0.018	-0.0161	0.017	0
YER070W	rnr1Y285A	YDR143C	SAN1	0.99683	0.011	1.0094	0.015	-0.01607	0.011	0
YER070W	rnr1Y285A	YPR129W	SCD6	1.03645	0.008	1.04955	0.01	-0.01597	0.008	0
YER070W	rnr1Y285A	YMR055C	BUB2	0.99126	0.006	1.01253	0.022	-0.01591	0.006	1e-05
YER070W	rnr1Y285A	YDR291W	HRQ1	1.05836	0.009	1.07538	0.053	-0.01586	0.009	0
YER070W	rnr1Y285A	YBR065C	ECM2	0.99616	0.021	1.01189	0.006	-0.01582	0.021	0
YER070W	rnr1Y285A	YGL259W	YPS5	1.0167	0.008	1.03651	0.029	-0.01582	0.008	2e-05
YER070W	rnr1Y285A	YKL222C	YKL222C	0.97443	0.019	0.99091	0.048	-0.01579	0.019	0
YER070W	rnr1Y285A	YLR023C	IZH3	1.04192	0.038	1.05034	0.025	-0.01576	0.038	1e-05
YER070W	rnr1Y285A	YOR366W	YOR366W	1.06337	0.018	1.07931	0.011	-0.01574	0.018	0
YER070W	rnr1Y285A	YDL233W	MFG1	1.02524	0.054	1.03573	0.039	-0.01568	0.054	4e-05
YER070W	rnr1Y285A	YIL092W	YIL092W	0.95154	0.003	0.96439	0.015	-0.01565	0.003	0
YER070W	rnr1Y285A	YOR265W	RBL2	0.9748	0.007	1.00025	0.018	-0.01561	0.007	2e-05
YER070W	rnr1Y285A	YDR269C	YDR269C	0.96879	0.015	0.98055	0.013	-0.01557	0.015	0
YER070W	rnr1Y285A	YPR145W	ASN1	0.96859	0.018	0.98424	0.001	-0.01552	0.018	0
YER070W	rnr1Y285A	YOR367W	SCP1	0.98547	0.033	0.99934	0.016	-0.01544	0.033	1e-05
YER070W	rnr1Y285A	YAL068C	PAU8	0.98751	0.018	1.00536	0.011	-0.01539	0.018	0
YER070W	rnr1Y285A	YPL096W	PNG1	1.00936	0.036	1.02139	0.029	-0.01538	0.036	1e-05
YER070W	rnr1Y285A	YGR273C	YGR273C	0.9756	0.018	0.98752	0.01	-0.01535	0.018	0
YER070W	rnr1Y285A	YDL019C	OSH2	1.01812	0.06	1.03352	0.009	-0.01534	0.059	5e-05
YER070W	rnr1Y285A	YDR340W	YDR340W	1.02232	0.014	1.03723	0.002	-0.01531	0.014	0
YER070W	rnr1Y285A	YNR075W	COS10	0.95505	0.009	0.97745	0.04	-0.01527	0.009	0
YER070W	rnr1Y285A	YMR285C	NGL2	0.98958	0.033	0.99515	0.055	-0.01524	0.033	1e-05
YER070W	rnr1Y285A	YKL026C	GPX1	0.98777	0.012	1.00287	0.002	-0.01523	0.012	5e-05
YER070W	rnr1Y285A	YJL027C	YJL027C	1.05924	0.023	1.07247	0.009	-0.01522	0.023	0
YER070W	rnr1Y285A	YOR023C	AHC1	1.0063	0.007	1.0256	0.013	-0.01521	0.007	2e-05
YER070W	rnr1Y285A	YBR054W	YRO2	1.00958	0.012	1.02293	0.003	-0.01507	0.012	0
YER070W	rnr1Y285A	YML131W	YML131W	1.00818	0.017	1.02415	0.021	-0.01497	0.017	0
YER070W	rnr1Y285A	YCR001W	YCR001W	1.05489	0.017	1.07138	0.011	-0.01493	0.017	0
YER070W	rnr1Y285A	YOR237W	HES1	1.03542	0.015	1.04836	0.005	-0.01487	0.015	7e-05
YER070W	rnr1Y285A	YLR329W	REC102	0.97574	0.004	0.99645	0.027	-0.01486	0.004	1e-05
YER070W	rnr1Y285A	YKR089C	TGL4	1.02349	0.017	1.03561	0.012	-0.01481	0.017	0
YER070W	rnr1Y285A	YMR139W	RIM11	0.92464	0.025	0.94781	0.053	-0.01481	0.025	1e-05
YER070W	rnr1Y285A	YOR069W	VPS5	0.66218	0.035	0.65733	0.08	-0.01478	0.035	4e-05
YER070W	rnr1Y285A	YGR137W	YGR137W	1.0046	0.011	1.02244	0.016	-0.01477	0.011	0
YER070W	rnr1Y285A	YCR107W	AAD3	1.05331	0.031	1.06567	0.007	-0.01477	0.031	1e-05
YER070W	rnr1Y285A	YIL005W	EPS1	1.00544	0.027	1.02225	0.006	-0.01474	0.027	1e-05
YER070W	rnr1Y285A	YKL017C	HCS1	1.08601	0.015	1.10156	0.012	-0.01472	0.015	0
YER070W	rnr1Y285A	YFR047C	BNA6	0.78664	0.016	0.80409	0.015	-0.01468	0.015	0
YER070W	rnr1Y285A	YBR235W	VHC1	0.97529	0.016	0.99056	0.006	-0.01466	0.016	0
YER070W	rnr1Y285A	YNL078W	NIS1	1.07229	0.004	1.08745	0.027	-0.01458	0.004	0
YER070W	rnr1Y285A	YKL109W	HAP4	0.96093	0.008	0.96934	0.03	-0.01457	0.008	2e-05
YER070W	rnr1Y285A	YJL017W	YJL017W	1.06841	0.022	1.08004	0.02	-0.01457	0.022	0
YER070W	rnr1Y285A	YGL013C	PDR1	1.05645	0.01	1.0688	0.014	-0.01456	0.01	0
YER070W	rnr1Y285A	YIL088C	AVT7	0.9806	0.018	0.99475	0.006	-0.01454	0.018	0
YER070W	rnr1Y285A	YIL114C	POR2	1.04665	0.024	1.0663	0.024	-0.01452	0.024	0
YER070W	rnr1Y285A	YLR114C	AVL9	0.92207	0.004	0.93091	0.046	-0.01448	0.004	0
YER070W	rnr1Y285A	YOR138C	RUP1	0.98358	0.017	0.99974	0.001	-0.01445	0.017	0
YER070W	rnr1Y285A	YJL021C	YJL021C	0.95269	0.016	0.963	0.012	-0.01443	0.016	0
YER070W	rnr1Y285A	YJL208C	NUC1	1.01413	0.023	1.02632	0.032	-0.01442	0.023	0
YER070W	rnr1Y285A	YML057W	CMP2	0.98596	0.018	1.00566	0.019	-0.01435	0.018	0
YER070W	rnr1Y285A	YBR245C	ISW1	0.96262	0.011	0.9747	0.007	-0.01433	0.011	0
YER070W	rnr1Y285A	YFL013W-A	YFL013W-A	0.77803	0.025	0.78566	0.027	-0.01432	0.025	1e-05
YER070W	rnr1Y285A	YPL130W	SPO19	1.00578	0.011	1.02182	0.05	-0.01426	0.011	0
YER070W	rnr1Y285A	YKR103W	NFT1	1.00072	0.017	1.02159	0.086	-0.01425	0.017	0
YER070W	rnr1Y285A	YIL010W	DOT5	0.99736	0.013	1.01321	0.007	-0.01421	0.013	0
YER070W	rnr1Y285A	YKR056W	TRM2	0.96213	0.028	0.98005	0.025	-0.0142	0.028	1e-05
YER070W	rnr1Y285A	YPL202C	AFT2	0.98725	0.009	1.00039	0.01	-0.01416	0.009	0
YER070W	rnr1Y285A	YOR320C	GNT1	1.00711	0.028	1.02087	0.008	-0.01415	0.028	1e-05
YER070W	rnr1Y285A	YKL121W	DGR2	1.04741	0.035	1.06167	0.03	-0.01414	0.035	1e-05
YER070W	rnr1Y285A	YDR026C	NSI1	0.9797	0.021	0.99126	0.015	-0.01413	0.021	0
YER070W	rnr1Y285A	YPL264C	YPL264C	0.99985	0.007	1.01406	0.023	-0.01411	0.007	1e-05
YER070W	rnr1Y285A	YBR178W	YBR178W	1.08037	0.01	1.09265	0.003	-0.01402	0.01	0
YER070W	rnr1Y285A	YCR008W	SAT4	0.9425	0.004	0.95585	0.015	-0.01397	0.004	0
YER070W	rnr1Y285A	YDR272W	GLO2	0.9604	0.022	0.9808	0.028	-0.01394	0.022	0
YER070W	rnr1Y285A	YDR371W	CTS2	1.01048	0.035	1.01952	0.046	-0.01394	0.035	1e-05
YER070W	rnr1Y285A	YOR154W	SLP1	0.98126	0.015	0.99628	0.007	-0.01391	0.015	0
YER070W	rnr1Y285A	YML096W	YML096W	1.03745	0.003	1.05177	0.005	-0.01386	0.003	0
YER070W	rnr1Y285A	YPR005C	HAL1	0.95226	0.007	0.96927	0.014	-0.01386	0.007	2e-05
YER070W	rnr1Y285A	YDL074C	BRE1	0.48363	0.03	0.49821	0.09	-0.01383	0.03	6e-05
YER070W	rnr1Y285A	YIR014W	YIR014W	1.05084	0.013	1.06247	0.023	-0.01383	0.013	0
YER070W	rnr1Y285A	YPL267W	ACM1	0.9152	0.003	0.9308	0.042	-0.0138	0.003	0
YER070W	rnr1Y285A	YNL045W	LAP2	0.99634	0.046	1.00949	0.015	-0.01376	0.046	3e-05
YER070W	rnr1Y285A	YBR287W	YBR287W	0.89315	0.06	0.90735	0.004	-0.01374	0.06	8e-05
YER070W	rnr1Y285A	YHR109W	CTM1	1.05062	0.014	1.06384	0.01	-0.01367	0.014	0
YER070W	rnr1Y285A	YBL103C	RTG3	1.02755	0.018	1.03961	0.019	-0.01366	0.018	0.0001
YER070W	rnr1Y285A	YGR110W	CLD1	0.97624	0.021	0.99236	0.016	-0.01362	0.021	0
YER070W	rnr1Y285A	YBR057C	MUM2	0.95087	0.007	0.96561	0.002	-0.01361	0.007	0
YER070W	rnr1Y285A	YCR015C	YCR015C	1.02537	0.015	1.03979	0.009	-0.01355	0.015	0
YER070W	rnr1Y285A	YMR178W	YMR178W	1.03804	0.032	1.05465	0.036	-0.01354	0.032	1e-05
YER070W	rnr1Y285A	YGR263C	SAY1	1.05537	0.006	1.06735	0.021	-0.01348	0.006	1e-05
YER070W	rnr1Y285A	YBR203W	COS111	1.05942	0.017	1.06989	0.013	-0.01345	0.017	0
YER070W	rnr1Y285A	YLR030W	YLR030W	0.94527	0.007	0.95875	0.006	-0.01342	0.007	2e-05
YER070W	rnr1Y285A	YGR247W	CPD1	0.97802	0.019	0.98996	0.023	-0.0134	0.019	0
YER070W	rnr1Y285A	YLR017W	MEU1	0.94434	0.017	0.96046	0.021	-0.01338	0.017	0
YER070W	rnr1Y285A	YKR082W	NUP133	0.47946	0.073	0.48684	0.046	-0.01334	0.073	0.00096
YER070W	rnr1Y285A	YIL170W	HXT12	0.98578	0.088	0.99106	0.118	-0.01334	0.088	0.00019
YER070W	rnr1Y285A	YDL197C	ASF2	0.99914	0.012	1.00893	0.009	-0.01333	0.012	0
YER070W	rnr1Y285A	YGL021W	ALK1	1.04414	0.028	1.0519	0.033	-0.01327	0.028	1e-05
YER070W	rnr1Y285A	YLR262C-A	TMA7	1.08272	0.027	1.0922	0.048	-0.01326	0.027	0
YER070W	rnr1Y285A	YDR326C	YSP2	1.04815	0.008	1.05906	0.017	-0.01321	0.008	0
YER070W	rnr1Y285A	YMR226C	YMR226C	0.95943	0.013	0.97615	0.022	-0.01315	0.013	0
YER070W	rnr1Y285A	YKL020C	SPT23	0.95217	0.007	0.96975	0.023	-0.01314	0.007	0
YER070W	rnr1Y285A	YPL206C	PGC1	1.05081	0.014	1.06267	0.014	-0.0131	0.014	0
YER070W	rnr1Y285A	YIL073C	SPO22	0.96261	0.017	0.97716	0.022	-0.01308	0.017	0
YER070W	rnr1Y285A	YPL163C	SVS1	0.99525	0.041	1.00586	0.011	-0.01302	0.041	2e-05
YER070W	rnr1Y285A	YML052W	SUR7	0.97046	0.036	0.98696	0.022	-0.01301	0.036	1e-05
YER070W	rnr1Y285A	YPL061W	ALD6	1.04356	0.03	1.05514	0.018	-0.01298	0.03	1e-05
YER070W	rnr1Y285A	YPL157W	TGS1	1.00834	0.042	1.0174	0.009	-0.01297	0.042	2e-05
YER070W	rnr1Y285A	YIL052C	RPL34B	1.03468	0.016	1.04506	0.015	-0.01293	0.016	0
YER070W	rnr1Y285A	YBR219C	YBR219C	1.00662	0.02	1.01779	0.018	-0.01291	0.02	0.00013
YER070W	rnr1Y285A	YKL071W	YKL071W	0.98321	0.023	0.99554	0.026	-0.01287	0.023	0
YER070W	rnr1Y285A	YHR185C	PFS1	0.99534	0.028	1.00721	0.005	-0.01286	0.028	1e-05
YER070W	rnr1Y285A	YCR090C	YCR090C	0.95638	0.126	0.9716	0.012	-0.01284	0.126	0.00062
YER070W	rnr1Y285A	YDR048C	YDR048C	0.95464	0.03	0.95477	0.036	-0.01284	0.03	1e-05
YER070W	rnr1Y285A	YIL029C	YIL029C	1.06106	0.026	1.07486	0.048	-0.01274	0.025	0
YER070W	rnr1Y285A	YDL056W	MBP1	1.11348	0.04	1.12515	0.008	-0.01274	0.039	1e-05
YER070W	rnr1Y285A	YDL226C	GCS1	1.00045	0.036	1.00493	0.056	-0.01265	0.036	1e-05
YER070W	rnr1Y285A	YJR001W	AVT1	0.93691	0.008	0.94896	0.026	-0.0126	0.008	0
YER070W	rnr1Y285A	YKR077W	MSA2	1.01209	0.022	1.02945	0.025	-0.01258	0.022	0
YER070W	rnr1Y285A	YFR041C	ERJ5	1.00561	0.025	1.01922	0.011	-0.01258	0.025	0
YER070W	rnr1Y285A	YPL092W	SSU1	1.01033	0.015	1.02004	0.01	-0.01258	0.015	0
YER070W	rnr1Y285A	YKR076W	ECM4	1.11275	0.018	1.13167	0.044	-0.01247	0.018	0
YER070W	rnr1Y285A	YHR200W	RPN10	0.94839	0.011	0.95922	0.019	-0.01233	0.011	0
YER070W	rnr1Y285A	YJR038C	YJR038C	1.01038	0.016	1.02444	0.024	-0.01233	0.016	0
YER070W	rnr1Y285A	YDR482C	CWC21	0.99778	0.032	1.01521	0.037	-0.0123	0.032	1e-05
YER070W	rnr1Y285A	YLR220W	CCC1	0.95869	0.018	0.97902	0.027	-0.01229	0.018	0
YER070W	rnr1Y285A	YOR202W	HIS3	0.99055	0.147	0.9803	0.142	-0.01224	0.147	0
YER070W	rnr1Y285A	YDR099W	BMH2	0.9675	0.014	0.9807	0.017	-0.01223	0.014	0
YER070W	rnr1Y285A	YIL025C	YIL025C	1.01744	0.007	1.02922	0.01	-0.01222	0.006	1e-05
YER070W	rnr1Y285A	YGR217W	CCH1	0.98065	0.023	0.99343	0.026	-0.01218	0.023	0
YER070W	rnr1Y285A	YJR030C	YJR030C	1.00803	0.003	1.0178	0.005	-0.01218	0.003	0
YER070W	rnr1Y285A	YAR037W	YAR037W	0.98419	0.019	0.99531	0.021	-0.01213	0.019	0
YER070W	rnr1Y285A	YOL101C	IZH4	1.0305	0.027	1.04449	0.03	-0.01211	0.027	1e-05
YER070W	rnr1Y285A	YPR046W	MCM16	1.00416	0.032	1.00877	0.031	-0.01211	0.032	1e-05
YER070W	rnr1Y285A	YLR135W	SLX4	0.99015	0.02	1.00394	0.03	-0.01206	0.02	0
YER070W	rnr1Y285A	YDR533C	HSP31	0.99718	0.026	1.00654	0.006	-0.01206	0.026	0
YER070W	rnr1Y285A	YIL132C	CSM2	0.95914	0.019	0.97085	0.006	-0.01205	0.019	0
YER070W	rnr1Y285A	YHR139C-A	YHR139C-A	0.99456	0.031	1.00424	0.014	-0.01202	0.031	1e-05
YER070W	rnr1Y285A	YFR057W	YFR057W	1.01789	0.038	1.01772	0.044	-0.012	0.038	1e-05
YER070W	rnr1Y285A	YOR318C	YOR318C	1.00541	0.028	1.02209	0.03	-0.01191	0.028	1e-05
YER070W	rnr1Y285A	YNL065W	AQR1	0.99876	0.021	1.01216	0.016	-0.01184	0.021	0
YER070W	rnr1Y285A	YPL080C	YPL080C	0.87263	0.033	0.88461	0.012	-0.01183	0.033	2e-05
YER070W	rnr1Y285A	YOR189W	IES4	1.02511	0.024	1.0405	0.024	-0.01176	0.024	0
YER070W	rnr1Y285A	YJL064W	YJL064W	1.01158	0.03	1.01638	0.026	-0.01174	0.03	1e-05
YER070W	rnr1Y285A	YAR042W	SWH1	1.01352	0.01	1.02442	0.013	-0.01169	0.01	0
YER070W	rnr1Y285A	YCL033C	MXR2	1.02568	0.014	1.02549	0.026	-0.0116	0.014	7e-05
YER070W	rnr1Y285A	YGR194C	XKS1	1.00121	0.005	1.01709	0.029	-0.01159	0.005	1e-05
YER070W	rnr1Y285A	YOR180C	DCI1	1.01337	0.025	1.02374	0.003	-0.01155	0.025	0
YER070W	rnr1Y285A	YJR039W	YJR039W	1.00657	0.032	1.0265	0.035	-0.01149	0.032	1e-05
YER070W	rnr1Y285A	YNL020C	ARK1	0.95718	0.05	0.96693	0.014	-0.01144	0.05	4e-05
YER070W	rnr1Y285A	YDR270W	CCC2	1.03589	0.046	1.0451	0.006	-0.01144	0.046	2e-05
YER070W	rnr1Y285A	YGR087C	PDC6	1.03032	0.021	1.04016	0.007	-0.01133	0.021	0
YER070W	rnr1Y285A	YPL179W	PPQ1	0.92957	0.007	0.94222	0.021	-0.01129	0.007	2e-05
YER070W	rnr1Y285A	YBL037W	APL3	0.9724	0.007	0.98645	0.018	-0.01127	0.007	0
YER070W	rnr1Y285A	YPL262W	FUM1	0.89123	0.018	0.89843	0.019	-0.01127	0.018	0
YER070W	rnr1Y285A	YLR253W	YLR253W	0.9957	0.041	1.00255	0.038	-0.01124	0.041	2e-05
YER070W	rnr1Y285A	YPL030W	TRM44	0.95672	0.031	0.96922	0.02	-0.01124	0.031	1e-05
YER070W	rnr1Y285A	YOR354C	MSC6	0.95185	0.009	0.96583	0.014	-0.01123	0.009	0
YER070W	rnr1Y285A	YML101C	CUE4	1.04418	0.023	1.05147	0.015	-0.01117	0.023	0
YER070W	rnr1Y285A	YCR087W	YCR087W	1.06238	0.014	1.07277	0.016	-0.01114	0.014	0
YER070W	rnr1Y285A	YKL015W	PUT3	0.97692	0.019	0.987	0.026	-0.01111	0.018	0
YER070W	rnr1Y285A	YIR042C	YIR042C	0.99454	0.021	1.00563	0.003	-0.01111	0.021	0
YER070W	rnr1Y285A	YDR222W	YDR222W	0.99802	0.006	1.00158	0.023	-0.01108	0.006	0
YER070W	rnr1Y285A	YJL159W	HSP150	1.09039	0.014	1.10006	0.021	-0.01105	0.014	0
YER070W	rnr1Y285A	YPL113C	YPL113C	1.03876	0.029	1.05223	0.029	-0.01104	0.029	1e-05
YER070W	rnr1Y285A	YKL146W	AVT3	0.97902	0.007	0.98928	0.019	-0.01101	0.007	2e-05
YER070W	rnr1Y285A	YHR044C	DOG1	0.93897	0.006	0.93616	0.094	-0.01101	0.006	1e-05
YER070W	rnr1Y285A	YOR321W	PMT3	1.00833	0.12	1.02202	0.013	-0.01089	0.12	0.00046
YER070W	rnr1Y285A	YHL029C	OCA5	0.468	0.136	0.44331	0.205	-0.0108	0.136	0.00633
YER070W	rnr1Y285A	YLR268W	SEC22	0.93641	0.027	0.94761	0.007	-0.0108	0.027	1e-05
YER070W	rnr1Y285A	YKL168C	KKQ8	0.97275	0.174	0.98098	0.11	-0.01077	0.174	0.00154
YER070W	rnr1Y285A	YBL096C	YBL096C	0.97053	0.014	0.98374	0.015	-0.01076	0.014	0
YER070W	rnr1Y285A	YLR376C	PSY3	0.98557	0.013	0.99757	0.015	-0.01075	0.013	0
YER070W	rnr1Y285A	YOR298W	MUM3	0.96819	0.016	0.97894	0.014	-0.01075	0.016	0
YER070W	rnr1Y285A	YML120C	NDI1	1.01906	0.006	1.02851	0.029	-0.01073	0.006	0
YER070W	rnr1Y285A	YOR052C	YOR052C	1.00784	0.01	1.0236	0.013	-0.01072	0.01	0
YER070W	rnr1Y285A	YOR072W	YOR072W	1.00641	0.022	1.01932	0.002	-0.01072	0.022	0
YER070W	rnr1Y285A	YLR364W	GRX8	1.04461	0.004	1.04811	0.03	-0.01071	0.004	1e-05
YER070W	rnr1Y285A	YHL009C	YAP3	0.98343	0.004	1.00439	0.039	-0.01068	0.004	1e-05
YER070W	rnr1Y285A	YML109W	ZDS2	0.94537	0.016	0.93445	0.088	-0.01068	0.016	0
YER070W	rnr1Y285A	YIL103W	DPH1	0.94104	0.017	0.95332	0.016	-0.01068	0.017	0
YER070W	rnr1Y285A	YLR054C	OSW2	1.01299	0.03	1.02302	0.015	-0.01064	0.03	1e-05
YER070W	rnr1Y285A	YDL013W	SLX5	0.63585	0.026	0.6454	0.003	-0.01064	0.026	2e-05
YER070W	rnr1Y285A	YNR040W	YNR040W	0.95918	0.003	0.97376	0.012	-0.01063	0.003	0
YER070W	rnr1Y285A	YGL016W	KAP122	0.9275	0.007	0.93516	0.015	-0.01062	0.007	0
YER070W	rnr1Y285A	YHL016C	DUR3	0.97716	0.014	0.98774	0.018	-0.01053	0.014	0
YER070W	rnr1Y285A	YDR426C	YDR426C	0.94121	0.014	0.95085	0.02	-0.01051	0.014	0
YER070W	rnr1Y285A	YMR191W	SPG5	1.04201	0.021	1.05618	0.035	-0.01049	0.021	0
YER070W	rnr1Y285A	YPR062W	FCY1	0.97438	0.021	0.98034	0.017	-0.01049	0.021	0
YER070W	rnr1Y285A	YDR411C	DFM1	0.96638	0.058	0.97273	0.031	-0.01045	0.058	6e-05
YER070W	rnr1Y285A	YNR055C	HOL1	1.02888	0.026	1.04413	0.009	-0.01044	0.026	0
YER070W	rnr1Y285A	YHR029C	YHI9	0.97432	0.012	0.9891	0.023	-0.0104	0.012	0
YER070W	rnr1Y285A	YNL024C	YNL024C	1.00145	0.045	1.00872	0.011	-0.01035	0.045	2e-05
YER070W	rnr1Y285A	YMR022W	UBC7	1.03325	0.013	1.04299	0.026	-0.01035	0.013	5e-05
YER070W	rnr1Y285A	YKR058W	GLG1	0.9443	0.015	0.95472	0.021	-0.01032	0.015	0
YER070W	rnr1Y285A	YGR268C	HUA1	1.02543	0.207	1.02819	0.116	-0.01032	0.207	0.0022
YER070W	rnr1Y285A	YBR092C	PHO3	0.98547	0.006	0.99386	0.008	-0.01031	0.006	1e-05
YER070W	rnr1Y285A	YPL167C	REV3	1.00482	0.005	1.01728	0.011	-0.01021	0.005	0
YER070W	rnr1Y285A	YPR109W	YPR109W	0.98048	0.012	0.99107	0.038	-0.01015	0.012	5e-05
YER070W	rnr1Y285A	YDR505C	PSP1	1.00977	0.027	1.02313	0.016	-0.01002	0.027	1e-05
YER070W	rnr1Y285A	YAL020C	ATS1	0.95051	0.016	0.95664	0.025	-0.01	0.016	0
YER070W	rnr1Y285A	YJL178C	ATG27	1.01316	0.021	1.01794	0.021	-0.01	0.021	0.00015
YER070W	rnr1Y285A	YHL037C	YHL037C	0.95799	0.034	0.96712	0.005	-0.00997	0.034	1e-05
YER070W	rnr1Y285A	YBL091C	MAP2	1.03508	0.037	1.04779	0.01	-0.00996	0.037	1e-05
YER070W	rnr1Y285A	YDR354W	TRP4	1.04229	0.026	1.04689	0.013	-0.00984	0.025	0
YER070W	rnr1Y285A	YDL133C-A	RPL41B	1.00956	0.01	1.0181	0.002	-0.00982	0.01	0
YER070W	rnr1Y285A	YDR317W	HIM1	1.01114	0.034	1.01813	0.034	-0.00981	0.034	1e-05
YER070W	rnr1Y285A	YPL071C	YPL071C	0.97559	0.016	0.988	0.005	-0.00981	0.016	0
YER070W	rnr1Y285A	YOR090C	PTC5	1.01571	0.005	1.02704	0.02	-0.00976	0.005	1e-05
YER070W	rnr1Y285A	YDL012C	YDL012C	1.02291	0.003	1.03634	0.016	-0.00974	0.003	0
YER070W	rnr1Y285A	YPL141C	FRK1	1.04587	0.014	1.06118	0.037	-0.00974	0.014	0
YER070W	rnr1Y285A	YAL004W	YAL004W	1.02392	0.014	1.02272	0.031	-0.00973	0.014	0
YER070W	rnr1Y285A	YPR077C	YPR077C	1.03289	0.048	1.04163	0.001	-0.00969	0.048	3e-05
YER070W	rnr1Y285A	YMR174C	PAI3	0.99715	0.001	1.0077	0.007	-0.00965	0.001	0
YER070W	rnr1Y285A	YBL086C	YBL086C	1.05775	0.01	1.06523	0.025	-0.00958	0.01	0
YER070W	rnr1Y285A	YLR172C	DPH5	0.95623	0.016	0.97022	0.028	-0.00953	0.016	0
YER070W	rnr1Y285A	YBR186W	PCH2	1.02921	0.013	1.03991	0.003	-0.00953	0.013	0
YER070W	rnr1Y285A	YPL260W	YPL260W	0.89716	0.003	0.8879	0.072	-0.00953	0.003	0
YER070W	rnr1Y285A	YDR368W	YPR1	1.01661	0.012	1.02306	0.015	-0.00942	0.012	5e-05
YER070W	rnr1Y285A	YIL024C	YIL024C	0.98909	0.02	0.99989	0.017	-0.0094	0.02	0
YER070W	rnr1Y285A	YPR053C	YPR053C	0.99931	0.037	1.00938	0.02	-0.0094	0.037	1e-05
YER070W	rnr1Y285A	YOR380W	RDR1	0.97947	0.022	0.98715	0.024	-0.00937	0.022	0
YER070W	rnr1Y285A	YHL012W	YHL012W	0.99241	0.015	1.00333	0.009	-0.00935	0.015	0
YER070W	rnr1Y285A	YML100W	TSL1	1.00163	0.012	1.00846	0.011	-0.00935	0.012	0
YER070W	rnr1Y285A	YGR182C	YGR182C	1.06004	0.037	1.07438	0.032	-0.00933	0.037	1e-05
YER070W	rnr1Y285A	YBR008C	FLR1	0.98991	0.035	0.9978	0.005	-0.00932	0.035	1e-05
YER070W	rnr1Y285A	YGL080W	FMP37	0.98761	0.056	0.99567	0.011	-0.00923	0.056	0.00108
YER070W	rnr1Y285A	YJL116C	NCA3	0.97239	0.022	0.97845	0.013	-0.0092	0.022	0
YER070W	rnr1Y285A	YML027W	YOX1	0.98185	0.055	0.97658	0.066	-0.00916	0.055	5e-05
YER070W	rnr1Y285A	YBR214W	SDS24	1.02341	0.021	1.03428	0.04	-0.00915	0.021	0
YER070W	rnr1Y285A	YMR159C	ATG16	1.03392	0.004	1.04815	0.024	-0.00907	0.004	0
YER070W	rnr1Y285A	YMR278W	PGM3	1.03699	0.01	1.04761	0.036	-0.00902	0.01	3e-05
YER070W	rnr1Y285A	YBR016W	YBR016W	0.67343	0.123	0.68838	0.094	-0.009	0.123	0.00162
YER070W	rnr1Y285A	YDR107C	TMN2	1.01756	0.01	1.02982	0.052	-0.00899	0.01	3e-05
YER070W	rnr1Y285A	YDL123W	SNA4	0.9755	0.015	0.98465	0.003	-0.00886	0.015	0
YER070W	rnr1Y285A	YJR106W	ECM27	1.00225	0.045	1.01261	0.046	-0.00883	0.045	3e-05
YER070W	rnr1Y285A	YPL155C	KIP2	1.05147	0.004	1.06941	0.027	-0.00883	0.004	0
YER070W	rnr1Y285A	YNL120C	YNL120C	0.93632	0.022	0.94815	0.027	-0.00882	0.022	0
YER070W	rnr1Y285A	YPL258C	THI21	0.94006	0.009	0.94786	0.025	-0.00878	0.009	0
YER070W	rnr1Y285A	YLR368W	MDM30	1.02598	0.018	1.03816	0.014	-0.00875	0.018	0
YER070W	rnr1Y285A	YOL080C	REX4	0.98497	0.011	1.00042	0.029	-0.00874	0.011	0
YER070W	rnr1Y285A	YLR286C	CTS1	1.02363	0.021	1.03174	0.016	-0.00871	0.021	0
YER070W	rnr1Y285A	YCR085W	YCR085W	1.09786	0.013	1.10744	0.002	-0.0087	0.013	0
YER070W	rnr1Y285A	YDR275W	BSC2	1.01867	0.025	1.02314	0.007	-0.0087	0.025	0
YER070W	rnr1Y285A	YOL062C	APM4	1.02631	0.017	1.03225	0.03	-0.00869	0.017	0
YER070W	rnr1Y285A	YLR428C	YLR428C	0.98185	0.024	0.98971	0.012	-0.00869	0.024	0
YER070W	rnr1Y285A	YIL071C	PCI8	0.99387	0.052	1.00274	0.02	-0.00868	0.052	4e-05
YER070W	rnr1Y285A	YPR127W	YPR127W	0.98405	0.031	0.99643	0.008	-0.00866	0.031	1e-05
YER070W	rnr1Y285A	YPL069C	BTS1	0.48052	0.037	0.48793	0.018	-0.00859	0.037	0.00012
YER070W	rnr1Y285A	YMR105C	PGM2	0.99231	0.01	0.99709	0.02	-0.00853	0.01	0
YER070W	rnr1Y285A	YBR169C	SSE2	1.00619	0.005	1.01241	0.012	-0.0085	0.005	1e-05
YER070W	rnr1Y285A	YPR014C	YPR014C	1.03885	0.014	1.04394	0.017	-0.00839	0.014	6e-05
YER070W	rnr1Y285A	YDR178W	SDH4	0.95044	0.075	0.95081	0.042	-0.00838	0.075	0.00013
YER070W	rnr1Y285A	YDR400W	URH1	0.99258	0.023	0.99566	0.019	-0.00831	0.023	0
YER070W	rnr1Y285A	YDL059C	RAD59	0.97574	0.111	0.982	0.043	-0.0083	0.11	0.0004
YER070W	rnr1Y285A	YFL013C	IES1	0.83087	0.01	0.83904	0.019	-0.0083	0.01	5e-05
YER070W	rnr1Y285A	YML104C	MDM1	1.01972	0.027	1.02355	0.021	-0.00826	0.027	1e-05
YER070W	rnr1Y285A	YBR263W	SHM1	1.02551	0.029	1.03081	0.015	-0.00824	0.029	1e-05
YER070W	rnr1Y285A	YHR108W	GGA2	0.89262	0.023	0.9035	0.013	-0.00816	0.023	0
YER070W	rnr1Y285A	YHR207C	SET5	1.00353	0.016	1.01421	0.029	-0.00815	0.016	0
YER070W	rnr1Y285A	YDR383C	NKP1	0.94884	0.009	0.95436	0.028	-0.00814	0.009	3e-05
YER070W	rnr1Y285A	YBR217W	ATG12	1.0064	0.009	1.01264	0.007	-0.0081	0.008	0
YER070W	rnr1Y285A	YJR103W	URA8	0.95401	0.002	0.96218	0.014	-0.00809	0.002	0
YER070W	rnr1Y285A	YLR044C	PDC1	0.93168	0.017	0.94171	0.008	-0.00808	0.017	0
YER070W	rnr1Y285A	YPR058W	YMC1	1.0264	0.047	1.03949	0.026	-0.00801	0.047	3e-05
YER070W	rnr1Y285A	YDL169C	UGX2	1.00052	0.007	1.00818	0.009	-0.008	0.007	0
YER070W	rnr1Y285A	YJL137C	GLG2	0.98683	0.009	0.99437	0.006	-0.008	0.009	0
YER070W	rnr1Y285A	YBR278W	DPB3	0.9584	0.017	0.966	0.004	-0.00796	0.017	0
YER070W	rnr1Y285A	YLR042C	YLR042C	0.96052	0.007	0.9704	0.017	-0.00792	0.007	0
YER070W	rnr1Y285A	YBR099C	YBR099C	0.93675	0.028	0.94607	0.005	-0.0079	0.028	1e-05
YER070W	rnr1Y285A	YDL237W	AIM6	1.02964	0.001	1.03628	0.018	-0.00787	0.001	0
YER070W	rnr1Y285A	YDL154W	MSH5	1.01216	0.011	1.02123	0.005	-0.00786	0.011	0
YER070W	rnr1Y285A	YPR189W	SKI3	0.99735	0.027	1.00509	0.015	-0.00782	0.027	1e-05
YER070W	rnr1Y285A	YDL036C	PUS9	1.03378	0.013	1.0405	0.006	-0.0078	0.013	5e-05
YER070W	rnr1Y285A	YLR107W	REX3	1.05591	0.011	1.06356	0.001	-0.00775	0.011	0
YER070W	rnr1Y285A	YGR226C	YGR226C	1.00975	0.003	1.01833	0.001	-0.0077	0.003	0
YER070W	rnr1Y285A	YMR121C	RPL15B	0.99985	0.014	1.00968	0.018	-0.0077	0.014	0
YER070W	rnr1Y285A	YOR357C	SNX3	0.99862	0.021	0.99936	0.025	-0.0077	0.021	0
YER070W	rnr1Y285A	YKR036C	CAF4	1.00859	0.004	1.01808	0.024	-0.00765	0.004	1e-05
YER070W	rnr1Y285A	YOL024W	YOL024W	0.99739	0.06	1.00984	0.016	-0.00764	0.06	6e-05
YER070W	rnr1Y285A	YAL046C	AIM1	1.00546	0.018	1.00909	0.025	-0.00764	0.018	0
YER070W	rnr1Y285A	YJL198W	PHO90	1.06308	0.035	1.06246	0.033	-0.00759	0.035	1e-05
YER070W	rnr1Y285A	YKR078W	YKR078W	1.07255	0.033	1.07304	0.046	-0.00752	0.033	1e-05
YER070W	rnr1Y285A	YKR039W	GAP1	0.97476	0.038	0.97828	0.026	-0.00748	0.038	2e-05
YER070W	rnr1Y285A	YML122C	YML122C	0.90607	0.014	0.91533	0.009	-0.00747	0.014	0
YER070W	rnr1Y285A	YHR178W	STB5	0.93262	0.04	0.94493	0.047	-0.00742	0.04	2e-05
YER070W	rnr1Y285A	YDR258C	HSP78	1.04752	0.021	1.04826	0.025	-0.00742	0.021	0
YER070W	rnr1Y285A	YBR188C	NTC20	1.0471	0.015	1.05506	0.022	-0.00742	0.015	0
YER070W	rnr1Y285A	YHR125W	YHR125W	0.9831	0.008	0.98177	0.044	-0.0074	0.008	2e-05
YER070W	rnr1Y285A	YJL105W	SET4	0.99522	0.003	1.00678	0.019	-0.00732	0.003	0
YER070W	rnr1Y285A	YLR151C	PCD1	1.02049	0.027	1.02801	0.005	-0.0072	0.027	0
YER070W	rnr1Y285A	YPL212C	PUS1	0.95954	0.037	0.96408	0.015	-0.00718	0.037	2e-05
YER070W	rnr1Y285A	YPL192C	PRM3	0.74354	0.118	0.74871	0.125	-0.00717	0.118	0.00109
YER070W	rnr1Y285A	YNL105W	YNL105W	0.91494	0.032	0.91511	0.024	-0.00714	0.032	1e-05
YER070W	rnr1Y285A	YIL146C	ATG32	0.99958	0.012	1.00539	0.011	-0.00711	0.012	5e-05
YER070W	rnr1Y285A	YJR036C	HUL4	1.02254	0.019	1.02954	0.014	-0.00706	0.019	0
YER070W	rnr1Y285A	YGR108W	CLB1	1.01908	0.016	1.02408	0.019	-0.00705	0.016	0
YER070W	rnr1Y285A	YIL089W	YIL089W	1.05336	0.016	1.0616	0.008	-0.00704	0.016	0
YER070W	rnr1Y285A	YOR202W	HIS3	1.00245	0.085	1.00859	0.068	-0.00703	0.085	0
YER070W	rnr1Y285A	YJR095W	SFC1	0.98426	0.005	0.99996	0.024	-0.00701	0.005	1e-05
YER070W	rnr1Y285A	YOL060C	MAM3	0.92105	0.005	0.92295	0.036	-0.00699	0.005	1e-05
YER070W	rnr1Y285A	YMR140W	SIP5	1.08326	0.022	1.09353	0.016	-0.00692	0.022	0
YER070W	rnr1Y285A	YOR132W	VPS17	0.58893	0.158	0.58875	0.12	-0.00687	0.158	0.00502
YER070W	rnr1Y285A	YML072C	TCB3	0.99731	0.013	1.00577	0.017	-0.00685	0.013	0
YER070W	rnr1Y285A	YHL025W	SNF6	0.43848	0.042	0.44024	0.042	-0.0068	0.042	0.00025
YER070W	rnr1Y285A	YML019W	OST6	0.94835	0.011	0.95544	0.015	-0.0068	0.011	0
YER070W	rnr1Y285A	YDL171C	GLT1	1.00572	0.018	1.00898	0.035	-0.00677	0.018	0
YER070W	rnr1Y285A	YAL065C	YAL065C	1.06535	0.011	1.07388	0.013	-0.00676	0.011	0
YER070W	rnr1Y285A	YPL214C	THI6	0.97676	0.038	0.98312	0.037	-0.00666	0.038	2e-05
YER070W	rnr1Y285A	YMR186W	HSC82	0.99102	0.012	0.99792	0.021	-0.00653	0.012	0
YER070W	rnr1Y285A	YBR182C	SMP1	0.98028	0.016	0.98785	0.005	-0.00652	0.016	0
YER070W	rnr1Y285A	YHR009C	TDA3	1.07466	0.027	1.08379	0.017	-0.0065	0.027	0
YER070W	rnr1Y285A	YPL154C	PEP4	1.02807	0.008	1.03607	0.011	-0.00649	0.008	2e-05
YER070W	rnr1Y285A	YMR075W	RCO1	0.95578	0.016	0.95515	0.035	-0.0064	0.016	0
YER070W	rnr1Y285A	YDL204W	RTN2	0.95948	0.008	0.96831	0.026	-0.00634	0.008	0
YER070W	rnr1Y285A	YHR195W	NVJ1	1.08903	0.041	1.09847	0.009	-0.00629	0.041	1e-05
YER070W	rnr1Y285A	YLR034C	SMF3	0.98834	0.015	0.99492	0.011	-0.00627	0.015	0
YER070W	rnr1Y285A	YJR094C	IME1	1.06051	0.053	1.07216	0.03	-0.00624	0.053	3e-05
YER070W	rnr1Y285A	YBR149W	ARA1	0.98915	0.018	0.99176	0.024	-0.00621	0.018	0
YER070W	rnr1Y285A	YPL001W	HAT1	0.992	0.008	0.99566	0.012	-0.00618	0.008	2e-05
YER070W	rnr1Y285A	YMR020W	FMS1	0.91728	0.025	0.92581	0.022	-0.00612	0.025	1e-05
YER070W	rnr1Y285A	YNL011C	YNL011C	1.02255	0.009	1.02861	0.012	-0.0061	0.009	3e-05
YER070W	rnr1Y285A	YGR066C	YGR066C	1.00649	0.021	1.01566	0.02	-0.00593	0.021	0
YER070W	rnr1Y285A	YLR389C	STE23	0.99097	0.013	0.99944	0.01	-0.00583	0.013	0
YER070W	rnr1Y285A	YJL193W	YJL193W	1.009	0.013	1.01459	0.008	-0.00583	0.013	0
YER070W	rnr1Y285A	YAR002C-A	ERP1	1.00986	0.025	1.01587	0	-0.00579	0.025	0
YER070W	rnr1Y285A	YKR015C	YKR015C	1.06611	0.008	1.06635	0.024	-0.00576	0.008	0
YER070W	rnr1Y285A	YHR156C	LIN1	0.97682	0.027	0.98034	0.016	-0.00573	0.027	1e-05
YER070W	rnr1Y285A	YNL091W	NST1	0.91891	0.022	0.92435	0.003	-0.00573	0.022	0
YER070W	rnr1Y285A	YKL010C	UFD4	0.98832	0.018	0.9936	0.031	-0.00569	0.018	0
YER070W	rnr1Y285A	YOL117W	RRI2	1.00588	0.016	1.01396	0.004	-0.00568	0.016	0
YER070W	rnr1Y285A	YKL120W	OAC1	1.0129	0.003	1.01429	0.057	-0.00562	0.003	0
YER070W	rnr1Y285A	YDR511W	ACN9	0.9927	0.025	1.00016	0.038	-0.00553	0.025	0
YER070W	rnr1Y285A	YOL155C	HPF1	0.96691	0.072	0.95889	0.068	-0.0055	0.072	0.00011
YER070W	rnr1Y285A	YMR104C	YPK2	1.00761	0.003	1.01699	0.019	-0.0055	0.003	0
YER070W	rnr1Y285A	YML121W	GTR1	0.81649	0.059	0.82068	0.029	-0.00545	0.059	0.0001
YER070W	rnr1Y285A	YJL215C	YJL215C	0.98917	0.031	0.99575	0.009	-0.00541	0.031	1e-05
YER070W	rnr1Y285A	YKL158W	YKL158W	1.05747	0.016	1.06099	0.045	-0.00538	0.016	0
YER070W	rnr1Y285A	YPR022C	YPR022C	1.02741	0.028	1.02967	0.014	-0.00538	0.028	1e-05
YER070W	rnr1Y285A	YLR174W	IDP2	1.09254	0.015	1.0947	0.016	-0.00537	0.015	0
YER070W	rnr1Y285A	YDR132C	YDR132C	1.0657	0.027	1.07122	0.002	-0.00537	0.027	0
YER070W	rnr1Y285A	YJR107W	YJR107W	1.00772	0.004	1.01247	0.003	-0.00534	0.004	1e-05
YER070W	rnr1Y285A	YCL009C	ILV6	1.00973	0.016	1.01797	0.011	-0.00533	0.016	0
YER070W	rnr1Y285A	YLR072W	YLR072W	1.00805	0.008	1.01335	0.003	-0.00531	0.008	0
YER070W	rnr1Y285A	YGR124W	ASN2	1.02451	0.011	1.02973	0.004	-0.0053	0.011	4e-05
YER070W	rnr1Y285A	YDL099W	BUG1	1.10223	0.055	1.11642	0.051	-0.00523	0.055	3e-05
YER070W	rnr1Y285A	YGL159W	YGL159W	1.06814	0.028	1.07696	0.02	-0.00519	0.028	0
YER070W	rnr1Y285A	YNL030W	HHF2	1.055	0.031	1.05954	0.008	-0.00517	0.031	1e-05
YER070W	rnr1Y285A	YBL091C-A	SCS22	0.98293	0.011	0.98856	0.018	-0.00512	0.011	0
YER070W	rnr1Y285A	YDL213C	NOP6	0.98207	0.023	0.98652	0.002	-0.00509	0.023	0
YER070W	rnr1Y285A	YMR201C	RAD14	0.48189	0.145	0.47495	0.038	-0.00504	0.145	0.00695
YER070W	rnr1Y285A	YAR028W	YAR028W	1.01439	0.025	1.01656	0.033	-0.00503	0.024	0
YER070W	rnr1Y285A	YJR088C	EMC2	0.95784	0.011	0.96207	0.018	-0.00502	0.011	0
YER070W	rnr1Y285A	YOL050C	YOL050C	0.81866	0.005	0.81994	0.018	-0.00501	0.005	0
YER070W	rnr1Y285A	YBR264C	YPT10	1.0879	0.02	1.09663	0.016	-0.00499	0.02	0
YER070W	rnr1Y285A	YNL128W	TEP1	0.9674	0.034	0.95592	0.062	-0.0049	0.034	1e-05
YER070W	rnr1Y285A	YHR117W	TOM71	0.99746	0.009	0.99936	0.008	-0.00478	0.009	3e-05
YER070W	rnr1Y285A	YDR348C	PAL1	0.96526	0.017	0.96611	0.03	-0.00476	0.017	0
YER070W	rnr1Y285A	YGL248W	PDE1	1.03009	0.051	1.03284	0.037	-0.00476	0.051	3e-05
YER070W	rnr1Y285A	YJL108C	PRM10	1.02083	0.03	1.02494	0.007	-0.00476	0.03	1e-05
YER070W	rnr1Y285A	YBR118W	TEF2	1.0182	0.016	1.02176	0.022	-0.00475	0.016	0
YER070W	rnr1Y285A	YPL164C	MLH3	1.02772	0.002	1.0323	0.009	-0.00473	0.002	0
YER070W	rnr1Y285A	YGR051C	YGR051C	1.05154	0.004	1.05552	0.051	-0.00471	0.004	1e-05
YER070W	rnr1Y285A	YNR034W	SOL1	1.03397	0.005	1.03673	0.018	-0.0047	0.005	1e-05
YER070W	rnr1Y285A	YBL081W	YBL081W	0.9171	0.018	0.91739	0.016	-0.0047	0.018	0
YER070W	rnr1Y285A	YCL055W	KAR4	0.99644	0.026	1.00162	0.006	-0.00469	0.026	0
YER070W	rnr1Y285A	YGL253W	HXK2	0.87569	0.037	0.87722	0.014	-0.00464	0.037	2e-05
YER070W	rnr1Y285A	YDR210W	YDR210W	1.06112	0.011	1.0683	0.02	-0.0046	0.011	3e-05
YER070W	rnr1Y285A	YOR213C	SAS5	1.04165	0.027	1.04535	0.005	-0.00457	0.027	0
YER070W	rnr1Y285A	YDL137W	ARF2	0.98066	0.012	0.98975	0.014	-0.00454	0.012	0
YER070W	rnr1Y285A	YDR492W	IZH1	1.06061	0.076	1.06586	0.005	-0.00454	0.076	0.0001
YER070W	rnr1Y285A	YBL017C	PEP1	0.99535	0.021	0.9993	0.011	-0.00454	0.021	0
YER070W	rnr1Y285A	YLR120C	YPS1	0.97147	0.022	0.97445	0.025	-0.0045	0.022	0
YER070W	rnr1Y285A	YOR316C	COT1	0.99781	0.004	1.00306	0.003	-0.00448	0.004	1e-05
YER070W	rnr1Y285A	YOR371C	GPB1	1.07055	0.03	1.07341	0.005	-0.00447	0.03	1e-05
YER070W	rnr1Y285A	YJR010C-A	SPC1	1.00251	0.024	1.00276	0.025	-0.00442	0.024	0
YER070W	rnr1Y285A	YFL063W	YFL063W	0.9943	0.022	0.99821	0.009	-0.00442	0.022	0
YER070W	rnr1Y285A	YGL249W	ZIP2	1.03358	0.024	1.03429	0.044	-0.00437	0.024	0
YER070W	rnr1Y285A	YDR313C	PIB1	1.05149	0.011	1.05319	0.004	-0.00436	0.011	0
YER070W	rnr1Y285A	YOL104C	NDJ1	1.02051	0.02	1.02334	0.008	-0.00434	0.02	0
YER070W	rnr1Y285A	YDR031W	MIC14	1.01959	0.018	1.03075	0.029	-0.00434	0.018	0
YER070W	rnr1Y285A	YDR193W	YDR193W	0.99275	0.005	0.99752	0.025	-0.0043	0.005	1e-05
YER070W	rnr1Y285A	YPR198W	SGE1	1.07275	0.011	1.07547	0.024	-0.0043	0.011	0
YER070W	rnr1Y285A	YLL053C	YLL053C	1.02239	0.004	1.01282	0.067	-0.00423	0.004	0
YER070W	rnr1Y285A	YER181C	YER181C	1.01937	0.005	1.02314	0.006	-0.00419	0.005	1e-05
YER070W	rnr1Y285A	YAL015C	NTG1	1.00003	0.026	1.004	0.004	-0.00402	0.026	0
YER070W	rnr1Y285A	YOR348C	PUT4	0.99416	0.005	1.0015	0.013	-0.004	0.005	1e-05
YER070W	rnr1Y285A	YPL176C	TRE1	0.96223	0.021	0.96586	0.011	-0.00395	0.021	0
YER070W	rnr1Y285A	YGR085C	RPL11B	0.95389	0.018	0.95273	0.026	-0.00393	0.018	0
YER070W	rnr1Y285A	YIL072W	HOP1	0.98566	0.011	0.98724	0.018	-0.00393	0.011	0
YER070W	rnr1Y285A	YLR255C	YLR255C	0.94873	0.025	0.95324	0.028	-0.00392	0.025	1e-05
YER070W	rnr1Y285A	YPR007C	REC8	1.00675	0.025	1.01091	0.005	-0.0039	0.025	0
YER070W	rnr1Y285A	YPL149W	ATG5	1.04461	0.003	1.04488	0.017	-0.0039	0.003	0
YER070W	rnr1Y285A	YJL148W	RPA34	0.90314	0.019	0.90634	0.028	-0.00388	0.019	0
YER070W	rnr1Y285A	YLL042C	ATG10	1.00427	0.018	1.01018	0.006	-0.00384	0.018	0
YER070W	rnr1Y285A	YJL038C	LOH1	1.055	0.009	1.05609	0.011	-0.00374	0.009	2e-05
YER070W	rnr1Y285A	YLR241W	YLR241W	1.05243	0.012	1.05294	0.01	-0.00371	0.012	0
YER070W	rnr1Y285A	YLR343W	GAS2	1.00569	0.002	1.0078	0.008	-0.0037	0.002	0
YER070W	rnr1Y285A	YLR390W	ECM19	1.04122	0.003	1.04955	0.018	-0.00369	0.003	0
YER070W	rnr1Y285A	YKL187C	YKL187C	1.01917	0.05	1.01607	0.029	-0.00366	0.05	3e-05
YER070W	rnr1Y285A	YPL095C	EEB1	0.99404	0.009	0.99947	0.009	-0.00363	0.009	0
YER070W	rnr1Y285A	YDR133C	YDR133C	0.99871	0.051	0.97935	0.102	-0.00362	0.051	4e-05
YER070W	rnr1Y285A	YGR105W	VMA21	0.59614	0.003	0.58972	0.061	-0.00362	0.003	1e-05
YER070W	rnr1Y285A	YJR010W	MET3	0.98554	0.023	0.99099	0.011	-0.00355	0.023	0
YER070W	rnr1Y285A	YDR131C	YDR131C	0.95702	0.067	0.95843	0.047	-0.0035	0.067	9e-05
YER070W	rnr1Y285A	YJL107C	YJL107C	1.04162	0.01	1.04497	0.003	-0.0035	0.01	3e-05
YER070W	rnr1Y285A	YMR280C	CAT8	0.83727	0.003	0.84465	0.037	-0.00347	0.003	0
YER070W	rnr1Y285A	YDR446W	ECM11	0.99395	0.017	0.99768	0.001	-0.00346	0.017	0
YER070W	rnr1Y285A	YBR228W	SLX1	1.06027	0.038	1.05859	0.037	-0.00343	0.038	1e-05
YER070W	rnr1Y285A	YCR007C	YCR007C	1.02709	0.019	1.02873	0.011	-0.00343	0.019	0
YER070W	rnr1Y285A	YDR221W	GTB1	1.00546	0.02	1.00641	0.02	-0.00342	0.02	0
YER070W	rnr1Y285A	YDR453C	TSA2	1.05665	0.002	1.06205	0.01	-0.00341	0.002	0
YER070W	rnr1Y285A	YFL049W	SWP82	0.99126	0.013	0.99338	0.007	-0.00341	0.013	0
YER070W	rnr1Y285A	YOR273C	TPO4	1.0034	0.007	1.0069	0.004	-0.00341	0.007	2e-05
YER070W	rnr1Y285A	YLR031W	YLR031W	0.98031	0.018	0.98253	0.026	-0.00338	0.018	0
YER070W	rnr1Y285A	YPR123C	YPR123C	0.95036	0.05	0.94141	0.044	-0.00332	0.05	4e-05
YER070W	rnr1Y285A	YMR122C	YMR122C	1.01037	0.012	1.01373	0.003	-0.00331	0.012	0
YER070W	rnr1Y285A	YOR364W	YOR364W	1.00002	0.031	1.00356	0.008	-0.00331	0.031	1e-05
YER070W	rnr1Y285A	YDR506C	GMC1	1.01233	0.027	1.02044	0.039	-0.0033	0.027	1e-05
YER070W	rnr1Y285A	YOR202W	HIS3	1.00177	0.083	1.00489	0.073	-0.00328	0.082	0
YER070W	rnr1Y285A	YDR003W	RCR2	1.06315	0.006	1.05767	0.024	-0.00327	0.006	0
YER070W	rnr1Y285A	YDR125C	ECM18	1.01566	0.016	1.01	0.028	-0.00326	0.016	0
YER070W	rnr1Y285A	YMR153W	NUP53	1.07714	0.027	1.08698	0.032	-0.00324	0.027	0
YER070W	rnr1Y285A	YNL047C	SLM2	0.98569	0.005	0.98743	0.022	-0.00324	0.005	1e-05
YER070W	rnr1Y285A	YMR086C-A	YMR086C-A	1.0855	0.054	1.09572	0.05	-0.00321	0.054	3e-05
YER070W	rnr1Y285A	YMR145C	NDE1	1.02703	0.051	1.03395	0.016	-0.0032	0.051	3e-05
YER070W	rnr1Y285A	YIR017C	MET28	1.01827	0.024	1.01416	0.012	-0.00318	0.024	0
YER070W	rnr1Y285A	YMR101C	SRT1	1.03612	0.019	1.03607	0.043	-0.00317	0.019	0
YER070W	rnr1Y285A	YFL007W	BLM10	1.0121	0.017	1.01798	0.013	-0.00308	0.017	0
YER070W	rnr1Y285A	YAL040C	CLN3	1.02849	0.001	1.03019	0.003	-0.00305	0.001	0
YER070W	rnr1Y285A	YDR242W	AMD2	1.04253	0.028	1.04842	0.013	-0.00298	0.028	1e-05
YER070W	rnr1Y285A	YPL089C	RLM1	1.08773	0.004	1.09264	0.008	-0.00295	0.004	0
YER070W	rnr1Y285A	YMR118C	SHH3	1.05901	0.059	1.05929	0.007	-0.0029	0.059	5e-05
YER070W	rnr1Y285A	YKR026C	GCN3	0.97795	0.014	0.98069	0.014	-0.00283	0.014	0
YER070W	rnr1Y285A	YLR450W	HMG2	0.97879	0.018	0.98427	0.016	-0.00283	0.018	0
YER070W	rnr1Y285A	YPR184W	GDB1	1.00479	0.025	1.01071	0.007	-0.00282	0.025	0
YER070W	rnr1Y285A	YMR317W	YMR317W	0.9807	0.021	0.98275	0.014	-0.00281	0.021	0
YER070W	rnr1Y285A	YPL099C	AIM43	0.98117	0.025	0.98587	0.019	-0.00277	0.025	0
YER070W	rnr1Y285A	YNR020C	ATP23	0.90153	0.006	0.90711	0.013	-0.00276	0.006	1e-05
YER070W	rnr1Y285A	YOL003C	PFA4	0.96011	0.032	0.96664	0.027	-0.00273	0.032	1e-05
YER070W	rnr1Y285A	YLR354C	TAL1	1.03497	0.015	1.03513	0.004	-0.00273	0.015	0
YER070W	rnr1Y285A	YGL035C	MIG1	1.00265	0.013	1.00149	0.017	-0.00271	0.013	0
YER070W	rnr1Y285A	YGL104C	VPS73	1.02518	0.055	1.02214	0.023	-0.00271	0.055	4e-05
YER070W	rnr1Y285A	YLR168C	UPS2	1.00134	0.057	1.00271	0.041	-0.0027	0.057	5e-05
YER070W	rnr1Y285A	YAL014C	SYN8	0.98899	0.01	0.99326	0.005	-0.00266	0.01	0
YER070W	rnr1Y285A	YOR171C	LCB4	1.03939	0.023	1.04321	0.02	-0.00265	0.023	0
YER070W	rnr1Y285A	YPR037C	ERV2	1.02644	0.022	1.02532	0.021	-0.00262	0.022	0
YER070W	rnr1Y285A	YPL120W	VPS30	0.84675	0.025	0.8398	0.033	-0.0026	0.025	1e-05
YER070W	rnr1Y285A	YFR054C	YFR054C	1.03125	0.011	1.03942	0.023	-0.00255	0.011	4e-05
YER070W	rnr1Y285A	YOL089C	HAL9	0.99404	0.031	0.99652	0.012	-0.00251	0.031	1e-05
YER070W	rnr1Y285A	YOR202W	HIS3	0.99964	0.107	0.99726	0.068	-0.00248	0.107	0
YER070W	rnr1Y285A	YBL088C	TEL1	1.00287	0.022	0.99433	0.048	-0.00242	0.022	0
YER070W	rnr1Y285A	YPL224C	MMT2	0.9789	0.029	0.98247	0.011	-0.00237	0.029	1e-05
YER070W	rnr1Y285A	YGR207C	CIR1	1.07888	0.017	1.08112	0.001	-0.00232	0.017	0
YER070W	rnr1Y285A	YLR269C	YLR269C	1.00532	0.063	1.01438	0.035	-0.00232	0.063	7e-05
YER070W	rnr1Y285A	YJL150W	YJL150W	1.04125	0.018	1.04318	0.007	-0.00232	0.018	0
YER070W	rnr1Y285A	YHR167W	THP2	1.00114	0.036	1.01376	0.049	-0.00229	0.036	1e-05
YER070W	rnr1Y285A	YDR363W	ESC2	0.90994	0.021	0.90984	0.013	-0.00229	0.021	0
YER070W	rnr1Y285A	YLR287C-A	RPS30A	0.8104	0.004	0.80858	0.034	-0.0022	0.004	1e-05
YER070W	rnr1Y285A	YDR465C	RMT2	0.99976	0.004	1.01058	0.034	-0.0022	0.004	1e-05
YER070W	rnr1Y285A	YBL060W	YEL1	0.97063	0.02	0.97239	0.017	-0.00219	0.02	0
YER070W	rnr1Y285A	YKL129C	MYO3	0.9927	0.003	0.99719	0.022	-0.00218	0.003	0
YER070W	rnr1Y285A	YCR082W	AHC2	1.027	0.029	1.0249	0.017	-0.00217	0.029	1e-05
YER070W	rnr1Y285A	YBR044C	TCM62	0.95166	0.009	0.95294	0.015	-0.00215	0.009	0
YER070W	rnr1Y285A	YMR176W	ECM5	1.00435	0.015	1.00368	0.017	-0.00215	0.015	0
YER070W	rnr1Y285A	YCR106W	RDS1	1.0541	0.004	1.05564	0.021	-0.0021	0.004	0
YER070W	rnr1Y285A	YMR141C	YMR141C	1.02014	0.043	1.02395	0.028	-0.00208	0.043	2e-05
YER070W	rnr1Y285A	YKL183W	LOT5	1.04029	0.022	1.04042	0.013	-0.00207	0.022	0
YER070W	rnr1Y285A	YBR013C	YBR013C	0.9866	0.032	0.98299	0.047	-0.00206	0.032	1e-05
YER070W	rnr1Y285A	YIL099W	SGA1	1.02965	0.021	1.02707	0.024	-0.00197	0.021	0
YER070W	rnr1Y285A	YDL224C	WHI4	1.04712	0.035	1.0549	0.038	-0.00195	0.035	1e-05
YER070W	rnr1Y285A	YKR021W	ALY1	1.03499	0.019	1.03473	0.004	-0.00193	0.019	0
YER070W	rnr1Y285A	YKL025C	PAN3	1.02284	0.043	1.02604	0.011	-0.00191	0.043	2e-05
YER070W	rnr1Y285A	YBL107C	MIC23	0.98905	0.021	0.99161	0.003	-0.00191	0.021	0
YER070W	rnr1Y285A	YAR040C	YAR040C	1.02817	0.043	1.02564	0.032	-0.00191	0.043	2e-05
YER070W	rnr1Y285A	YGR015C	YGR015C	1.00705	0.009	1.01427	0.025	-0.00191	0.009	0
YER070W	rnr1Y285A	YPL220W	RPL1A	0.96959	0.024	0.96739	0.037	-0.00182	0.024	0
YER070W	rnr1Y285A	YLR227C	ADY4	1.05022	0.004	1.05358	0.017	-0.00179	0.004	0
YER070W	rnr1Y285A	YPR172W	YPR172W	1.00264	0.037	1.00471	0.012	-0.00177	0.037	1e-05
YER070W	rnr1Y285A	YOR291W	YPK9	0.9752	0.003	0.97559	0.039	-0.00175	0.003	0
YER070W	rnr1Y285A	YLR265C	NEJ1	1.02808	0.016	1.02769	0.018	-0.00173	0.016	0
YER070W	rnr1Y285A	YHL043W	ECM34	1.03142	0.075	1.036	0.029	-0.00162	0.075	0.0001
YER070W	rnr1Y285A	YPR158W	CUR1	1.02534	0.019	1.01707	0.04	-0.00155	0.019	0
YER070W	rnr1Y285A	YIL119C	RPI1	1.01839	0.011	1.01863	0.012	-0.00152	0.011	0
YER070W	rnr1Y285A	YPL184C	MRN1	1.00523	0.051	1.0051	0.006	-0.00151	0.051	4e-05
YER070W	rnr1Y285A	YKR017C	HEL1	1.06264	0.029	1.06265	0.003	-0.0015	0.029	1e-05
YER070W	rnr1Y285A	YDR171W	HSP42	1.04465	0.044	1.0332	0.048	-0.0015	0.044	2e-05
YER070W	rnr1Y285A	YDR380W	ARO10	1.06799	0.018	1.06759	0.001	-0.00147	0.018	0
YER070W	rnr1Y285A	YCL064C	CHA1	1.03827	0.014	1.0403	0.007	-0.00145	0.014	0
YER070W	rnr1Y285A	YKL001C	MET14	0.99879	0.045	1.00153	0.014	-0.00139	0.045	3e-05
YER070W	rnr1Y285A	YBR246W	RRT2	0.94243	0.016	0.94328	0.011	-0.00139	0.016	0
YER070W	rnr1Y285A	YIL102C	YIL102C	1.03644	0.009	1.03419	0.024	-0.00139	0.009	2e-05
YER070W	rnr1Y285A	YGR289C	MAL11	1.04831	0.006	1.04837	0.016	-0.00136	0.006	0
YER070W	rnr1Y285A	YHR031C	RRM3	0.99385	0.003	0.99438	0.012	-0.00135	0.003	0
YER070W	rnr1Y285A	YML112W	CTK3	1.02102	0.028	1.01786	0.032	-0.00134	0.028	1e-05
YER070W	rnr1Y285A	YIL136W	OM45	0.99608	0.015	0.99697	0.001	-0.00132	0.015	0
YER070W	rnr1Y285A	YAL010C	MDM10	0.83731	0.022	0.83819	0.005	-0.00128	0.022	0
YER070W	rnr1Y285A	YPR152C	URN1	0.96854	0.021	0.96807	0.018	-0.0012	0.021	0
YER070W	rnr1Y285A	YGR250C	YGR250C	1.00858	0.008	1.01338	0.013	-0.00118	0.008	0
YER070W	rnr1Y285A	YDR018C	YDR018C	0.94269	0.026	0.94529	0.013	-0.00116	0.026	1e-05
YER070W	rnr1Y285A	YJL186W	MNN5	0.988	0.024	0.99125	0.029	-0.00116	0.024	0
YER070W	rnr1Y285A	YBR288C	APM3	1.00117	0.007	0.99873	0.015	-0.00114	0.007	0
YER070W	rnr1Y285A	YBR225W	YBR225W	0.95172	0.038	0.95199	0.01	-0.0011	0.038	2e-05
YER070W	rnr1Y285A	YBR056W	YBR056W	0.99931	0.015	0.99967	0.002	-0.00109	0.015	0
YER070W	rnr1Y285A	YNL127W	FAR11	0.85286	0.068	0.85799	0.079	-0.00105	0.068	0.00014
YER070W	rnr1Y285A	YCR073W-A	SOL2	0.97682	0.02	0.97674	0.013	-0.00104	0.02	0
YER070W	rnr1Y285A	YOR227W	HER1	0.94592	0.008	0.94737	0.003	-0.00104	0.008	0
YER070W	rnr1Y285A	YOR131C	YOR131C	0.97551	0.057	0.97515	0.028	-0.00099	0.057	6e-05
YER070W	rnr1Y285A	YIL077C	YIL077C	0.78665	0.153	0.79181	0.154	-0.00096	0.153	0.00195
YER070W	rnr1Y285A	YIL064W	SEE1	0.93363	0.012	0.93913	0.035	-0.00095	0.012	0
YER070W	rnr1Y285A	YBR274W	CHK1	1.03054	0.013	1.02841	0.006	-0.00093	0.013	0
YER070W	rnr1Y285A	YAR047C	YAR047C	0.97026	0.01	0.97136	0.002	-0.00093	0.01	0
YER070W	rnr1Y285A	YLL048C	YBT1	1.01802	0.036	1.02319	0.016	-0.00085	0.036	1e-05
YER070W	rnr1Y285A	YMR246W	FAA4	1.02031	0.052	1.02137	0.023	-0.00083	0.052	4e-05
YER070W	rnr1Y285A	YDL050C	YDL050C	1.01301	0.023	1.01186	0.014	-0.00079	0.023	0
YER070W	rnr1Y285A	YDR517W	GRH1	1.04021	0.025	1.03951	0.006	-0.00077	0.025	0
YER070W	rnr1Y285A	YMR155W	YMR155W	0.98067	0.028	0.98121	0.016	-0.00075	0.028	1e-05
YER070W	rnr1Y285A	YGL262W	YGL262W	0.96455	0.024	0.96775	0.016	-0.00073	0.024	0
YER070W	rnr1Y285A	YAL056W	GPB2	1.02202	0.046	1.02871	0.024	-0.00071	0.046	3e-05
YER070W	rnr1Y285A	YMR315W	YMR315W	1.02794	0.028	1.02906	0.025	-0.00069	0.028	1e-05
YER070W	rnr1Y285A	YDR067C	OCA6	1.08213	0.015	1.07586	0.02	-0.00068	0.015	6e-05
YER070W	rnr1Y285A	YBR301W	PAU24	0.96406	0.005	0.96606	0.009	-0.00066	0.005	1e-05
YER070W	rnr1Y285A	YPR147C	YPR147C	1.02816	0.021	1.02734	0.028	-0.00065	0.021	0
YER070W	rnr1Y285A	YJL030W	MAD2	1.00797	0.028	1.00677	0.017	-0.00064	0.028	1e-05
YER070W	rnr1Y285A	YPR134W	MSS18	0.95237	0.007	0.95478	0.013	-0.00063	0.007	2e-05
YER070W	rnr1Y285A	YGR092W	DBF2	0.61082	0.047	0.60432	0.029	-0.00058	0.047	0.00012
YER070W	rnr1Y285A	YBR218C	PYC2	0.98593	0.05	0.9812	0.01	-0.00057	0.05	4e-05
YER070W	rnr1Y285A	YGR130C	YGR130C	0.99166	0.019	0.9936	0.005	-0.00057	0.019	0
YER070W	rnr1Y285A	YDR360W	YDR360W	0.95285	0.052	0.94757	0.023	-0.00046	0.052	4e-05
YER070W	rnr1Y285A	YJR108W	ABM1	0.93789	0.012	0.94402	0.019	-0.00044	0.012	0
YER070W	rnr1Y285A	YGR014W	MSB2	1.02345	0.044	1.02699	0.015	-0.00044	0.044	2e-05
YER070W	rnr1Y285A	YGR011W	YGR011W	1.00602	0.029	1.00925	0.045	-0.00041	0.029	1e-05
YER070W	rnr1Y285A	YDR186C	YDR186C	1.00882	0.041	1.00992	0.027	-0.0004	0.041	2e-05
YER070W	rnr1Y285A	YJR062C	NTA1	1.01626	0.045	1.01152	0.018	-0.00037	0.045	2e-05
YER070W	rnr1Y285A	YMR180C	CTL1	1.00031	0.03	1.00119	0.003	-0.00035	0.03	1e-05
YER070W	rnr1Y285A	YLR412W	BER1	1.04176	0.019	1.04063	0.007	-0.00034	0.019	0.00011
YER070W	rnr1Y285A	YMR170C	ALD2	0.99084	0.02	0.9932	0.015	-0.0003	0.02	0
YER070W	rnr1Y285A	YPL119C	DBP1	1.0473	0.016	1.04614	0.016	-0.00027	0.016	0
YER070W	rnr1Y285A	YDL039C	PRM7	1.08152	0.025	1.07953	0.006	-0.00018	0.025	0
YER070W	rnr1Y285A	YNL147W	LSM7	0.97342	0.007	0.97338	0.013	-0.00018	0.007	0
YER070W	rnr1Y285A	YAL058W	CNE1	0.95466	0.006	0.95788	0.006	-0.00012	0.006	1e-05
YER070W	rnr1Y285A	YGR290W	YGR290W	1.05614	0.04	1.0566	0.046	-8e-05	0.04	1e-05
YER070W	rnr1Y285A	YGR135W	PRE9	0.72761	0.002	0.72808	0.023	-6e-05	0.002	0
YER070W	rnr1Y285A	YNL115C	YNL115C	1.02455	0.018	1.0231	0.035	-5e-05	0.018	0
YER070W	rnr1Y285A	YOR363C	PIP2	1.08557	0.004	1.08462	0.014	-2e-05	0.004	0
YER070W	rnr1Y285A	YHR059W	FYV4	0.30485	0.363	0.09754	0.092	0.19469	0.363	0.19136
YER070W	rnr1Y285A	YHR057C	CPR2	0	0	0	0	0	0	#NUM!
YER070W	rnr1Y285A	YHR193C	EGD2	0	0	0	0	0	0	#NUM!
YER070W	rnr1Y285A	YIL036W	CST6	0.65291	0.471	0.79463	0.135	-0.14041	0.471	0.06947
YER070W	rnr1Y285A	YOL115W	PAP2	0	0	0	0	0	0	#NUM!
YER070W	rnr1Y285A	YOR111W	YOR111W	0	0	0	0	0	0	#NUM!
YER070W	rnr1Y285A	YOR141C	ARP8	0.05738	0.041	0.05642	0.001	0.0013	0.041	0.06954
YER070W	rnr1Y285A	YLR032W	RAD5	0	0	0	0	0	0	#NUM!
YER070W	rnr1Y285A	YLR221C	RSA3	0	0	0	0	0	0	#NUM!
YER070W	rnr1Y285A	YLR318W	EST2	0	0	0	0	0	0	#NUM!
YER070W	rnr1Y285A	YBR294W	SUL1	0.2146	0.278	0.72092	0.074	-0.49495	0.278	0.22014
YER070W	rnr1Y285A	YNL029C	KTR5	0	0	0	0	0	0	#NUM!
YER070W	rnr1Y285A	YNL167C	SKO1	#NUM!	#NUM!	#NUM!	#NUM!	#NUM!	#NUM!	#NUM!
YER070W	rnr1Y285A	YNL166C	BNI5	#NUM!	#NUM!	#NUM!	#NUM!	#NUM!	#NUM!	#NUM!
YER070W	rnr1Y285A	YNL165W	YNL165W	#NUM!	#NUM!	#NUM!	#NUM!	#NUM!	#NUM!	#NUM!
YER070W	rnr1Y285A	YNL164C	IBD2	#NUM!	#NUM!	#NUM!	#NUM!	#NUM!	#NUM!	#NUM!
YER070W	rnr1Y285A	YNL162W	RPL42A	#NUM!	#NUM!	#NUM!	#NUM!	#NUM!	#NUM!	#NUM!
YER070W	rnr1Y285A	YNL159C	ASI2	#NUM!	#NUM!	#NUM!	#NUM!	#NUM!	#NUM!	#NUM!
YER070W	rnr1Y285A	YNL190W	YNL190W	#NUM!	#NUM!	#NUM!	#NUM!	#NUM!	#NUM!	#NUM!
YER070W	rnr1Y285A	YNL187W	SWT21	#NUM!	#NUM!	#NUM!	#NUM!	#NUM!	#NUM!	#NUM!
YER070W	rnr1Y285A	YNL183C	NPR1	#NUM!	#NUM!	#NUM!	#NUM!	#NUM!	#NUM!	#NUM!
YER070W	rnr1Y285A	YNL179C	YNL179C	#NUM!	#NUM!	#NUM!	#NUM!	#NUM!	#NUM!	#NUM!
YER070W	rnr1Y285A	YNL176C	TDA7	#NUM!	#NUM!	#NUM!	#NUM!	#NUM!	#NUM!	#NUM!
YER070W	rnr1Y285A	YNL175C	NOP13	#NUM!	#NUM!	#NUM!	#NUM!	#NUM!	#NUM!	#NUM!
YER070W	rnr1Y285A	YNL173C	MDG1	#NUM!	#NUM!	#NUM!	#NUM!	#NUM!	#NUM!	#NUM!
YER070W	rnr1Y285A	YNL171C	YNL171C	#NUM!	#NUM!	#NUM!	#NUM!	#NUM!	#NUM!	#NUM!
YER070W	rnr1Y285A	YNL170W	YNL170W	#NUM!	#NUM!	#NUM!	#NUM!	#NUM!	#NUM!	#NUM!
YER070W	rnr1Y285A	YNL169C	PSD1	#NUM!	#NUM!	#NUM!	#NUM!	#NUM!	#NUM!	#NUM!
YER070W	rnr1Y285A	YNL168C	FMP41	#NUM!	#NUM!	#NUM!	#NUM!	#NUM!	#NUM!	#NUM!
YER070W	rnr1Y285A	YNL201C	PSY2	#NUM!	#NUM!	#NUM!	#NUM!	#NUM!	#NUM!	#NUM!
YER070W	rnr1Y285A	YNL200C	YNL200C	#NUM!	#NUM!	#NUM!	#NUM!	#NUM!	#NUM!	#NUM!
YER070W	rnr1Y285A	YNL199C	GCR2	#NUM!	#NUM!	#NUM!	#NUM!	#NUM!	#NUM!	#NUM!
YER070W	rnr1Y285A	YNL198C	YNL198C	#NUM!	#NUM!	#NUM!	#NUM!	#NUM!	#NUM!	#NUM!
YER070W	rnr1Y285A	YNL197C	WHI3	#NUM!	#NUM!	#NUM!	#NUM!	#NUM!	#NUM!	#NUM!
YER070W	rnr1Y285A	YNL196C	SLZ1	#NUM!	#NUM!	#NUM!	#NUM!	#NUM!	#NUM!	#NUM!
YER070W	rnr1Y285A	YNL195C	YNL195C	#NUM!	#NUM!	#NUM!	#NUM!	#NUM!	#NUM!	#NUM!
YER070W	rnr1Y285A	YNL194C	YNL194C	#NUM!	#NUM!	#NUM!	#NUM!	#NUM!	#NUM!	#NUM!
YER070W	rnr1Y285A	YNL193W	YNL193W	#NUM!	#NUM!	#NUM!	#NUM!	#NUM!	#NUM!	#NUM!
YER070W	rnr1Y285A	YNL192W	CHS1	#NUM!	#NUM!	#NUM!	#NUM!	#NUM!	#NUM!	#NUM!
YER070W	rnr1Y285A	YNL191W	DUG3	#NUM!	#NUM!	#NUM!	#NUM!	#NUM!	#NUM!	#NUM!
YER070W	rnr1Y285A	YNL217W	YNL217W	#NUM!	#NUM!	#NUM!	#NUM!	#NUM!	#NUM!	#NUM!
YER070W	rnr1Y285A	YNL215W	IES2	#NUM!	#NUM!	#NUM!	#NUM!	#NUM!	#NUM!	#NUM!
YER070W	rnr1Y285A	YNL214W	PEX17	#NUM!	#NUM!	#NUM!	#NUM!	#NUM!	#NUM!	#NUM!
YER070W	rnr1Y285A	YNL212W	VID27	#NUM!	#NUM!	#NUM!	#NUM!	#NUM!	#NUM!	#NUM!
YER070W	rnr1Y285A	YNL211C	YNL211C	#NUM!	#NUM!	#NUM!	#NUM!	#NUM!	#NUM!	#NUM!
YER070W	rnr1Y285A	YNL208W	YNL208W	#NUM!	#NUM!	#NUM!	#NUM!	#NUM!	#NUM!	#NUM!
YER070W	rnr1Y285A	YNL206C	RTT106	#NUM!	#NUM!	#NUM!	#NUM!	#NUM!	#NUM!	#NUM!
YER070W	rnr1Y285A	YNL205C	YNL205C	#NUM!	#NUM!	#NUM!	#NUM!	#NUM!	#NUM!	#NUM!
YER070W	rnr1Y285A	YNL204C	SPS18	#NUM!	#NUM!	#NUM!	#NUM!	#NUM!	#NUM!	#NUM!
YER070W	rnr1Y285A	YNL203C	YNL203C	#NUM!	#NUM!	#NUM!	#NUM!	#NUM!	#NUM!	#NUM!
YER070W	rnr1Y285A	YNL202W	SPS19	#NUM!	#NUM!	#NUM!	#NUM!	#NUM!	#NUM!	#NUM!
YER070W	rnr1Y285A	YNL233W	BNI4	#NUM!	#NUM!	#NUM!	#NUM!	#NUM!	#NUM!	#NUM!
YER070W	rnr1Y285A	YNL231C	PDR16	#NUM!	#NUM!	#NUM!	#NUM!	#NUM!	#NUM!	#NUM!
YER070W	rnr1Y285A	YNL230C	ELA1	#NUM!	#NUM!	#NUM!	#NUM!	#NUM!	#NUM!	#NUM!
YER070W	rnr1Y285A	YNL229C	URE2	#NUM!	#NUM!	#NUM!	#NUM!	#NUM!	#NUM!	#NUM!
YER070W	rnr1Y285A	YNL228W	YNL228W	#NUM!	#NUM!	#NUM!	#NUM!	#NUM!	#NUM!	#NUM!
YER070W	rnr1Y285A	YNL227C	JJJ1	#NUM!	#NUM!	#NUM!	#NUM!	#NUM!	#NUM!	#NUM!
YER070W	rnr1Y285A	YNL226W	YNL226W	#NUM!	#NUM!	#NUM!	#NUM!	#NUM!	#NUM!	#NUM!
YER070W	rnr1Y285A	YNL224C	SQS1	#NUM!	#NUM!	#NUM!	#NUM!	#NUM!	#NUM!	#NUM!
YER070W	rnr1Y285A	YNL223W	ATG4	#NUM!	#NUM!	#NUM!	#NUM!	#NUM!	#NUM!	#NUM!
YER070W	rnr1Y285A	YNL219C	ALG9	#NUM!	#NUM!	#NUM!	#NUM!	#NUM!	#NUM!	#NUM!
YER070W	rnr1Y285A	YNL253W	TEX1	#NUM!	#NUM!	#NUM!	#NUM!	#NUM!	#NUM!	#NUM!
YER070W	rnr1Y285A	YNL249C	MPA43	#NUM!	#NUM!	#NUM!	#NUM!	#NUM!	#NUM!	#NUM!
YER070W	rnr1Y285A	YNL246W	VPS75	#NUM!	#NUM!	#NUM!	#NUM!	#NUM!	#NUM!	#NUM!
YER070W	rnr1Y285A	YNL242W	ATG2	#NUM!	#NUM!	#NUM!	#NUM!	#NUM!	#NUM!	#NUM!
YER070W	rnr1Y285A	YNL241C	ZWF1	#NUM!	#NUM!	#NUM!	#NUM!	#NUM!	#NUM!	#NUM!
YER070W	rnr1Y285A	YNL239W	LAP3	#NUM!	#NUM!	#NUM!	#NUM!	#NUM!	#NUM!	#NUM!
YER070W	rnr1Y285A	YNL238W	KEX2	#NUM!	#NUM!	#NUM!	#NUM!	#NUM!	#NUM!	#NUM!
YER070W	rnr1Y285A	YNL237W	YTP1	#NUM!	#NUM!	#NUM!	#NUM!	#NUM!	#NUM!	#NUM!
YER070W	rnr1Y285A	YNL236W	SIN4	#NUM!	#NUM!	#NUM!	#NUM!	#NUM!	#NUM!	#NUM!
YER070W	rnr1Y285A	YNL235C	YNL235C	#NUM!	#NUM!	#NUM!	#NUM!	#NUM!	#NUM!	#NUM!
YER070W	rnr1Y285A	YNL234W	YNL234W	#NUM!	#NUM!	#NUM!	#NUM!	#NUM!	#NUM!	#NUM!
YER070W	rnr1Y285A	YNL274C	GOR1	#NUM!	#NUM!	#NUM!	#NUM!	#NUM!	#NUM!	#NUM!
YER070W	rnr1Y285A	YNL259C	ATX1	#NUM!	#NUM!	#NUM!	#NUM!	#NUM!	#NUM!	#NUM!
YER070W	rnr1Y285A	YNL257C	SIP3	#NUM!	#NUM!	#NUM!	#NUM!	#NUM!	#NUM!	#NUM!
YER070W	rnr1Y285A	YNL255C	GIS2	#NUM!	#NUM!	#NUM!	#NUM!	#NUM!	#NUM!	#NUM!
YER070W	rnr1Y285A	YNL254C	RTC4	#NUM!	#NUM!	#NUM!	#NUM!	#NUM!	#NUM!	#NUM!
YER070W	rnr1Y285A	YNL289W	PCL1	#NUM!	#NUM!	#NUM!	#NUM!	#NUM!	#NUM!	#NUM!
YER070W	rnr1Y285A	YNL288W	CAF40	#NUM!	#NUM!	#NUM!	#NUM!	#NUM!	#NUM!	#NUM!
YER070W	rnr1Y285A	YNL286W	CUS2	#NUM!	#NUM!	#NUM!	#NUM!	#NUM!	#NUM!	#NUM!
YER070W	rnr1Y285A	YNL285W	YNL285W	#NUM!	#NUM!	#NUM!	#NUM!	#NUM!	#NUM!	#NUM!
YER070W	rnr1Y285A	YNL283C	WSC2	#NUM!	#NUM!	#NUM!	#NUM!	#NUM!	#NUM!	#NUM!
YER070W	rnr1Y285A	YNL281W	HCH1	#NUM!	#NUM!	#NUM!	#NUM!	#NUM!	#NUM!	#NUM!
YER070W	rnr1Y285A	YNL280C	ERG24	#NUM!	#NUM!	#NUM!	#NUM!	#NUM!	#NUM!	#NUM!
YER070W	rnr1Y285A	YNL279W	PRM1	#NUM!	#NUM!	#NUM!	#NUM!	#NUM!	#NUM!	#NUM!
YER070W	rnr1Y285A	YNL278W	CAF120	#NUM!	#NUM!	#NUM!	#NUM!	#NUM!	#NUM!	#NUM!
YER070W	rnr1Y285A	YNL277W	MET2	#NUM!	#NUM!	#NUM!	#NUM!	#NUM!	#NUM!	#NUM!
YER070W	rnr1Y285A	YNL275W	BOR1	#NUM!	#NUM!	#NUM!	#NUM!	#NUM!	#NUM!	#NUM!
YER070W	rnr1Y285A	YNL301C	RPL18B	#NUM!	#NUM!	#NUM!	#NUM!	#NUM!	#NUM!	#NUM!
YER070W	rnr1Y285A	YNL300W	TOS6	#NUM!	#NUM!	#NUM!	#NUM!	#NUM!	#NUM!	#NUM!
YER070W	rnr1Y285A	YNL299W	TRF5	#NUM!	#NUM!	#NUM!	#NUM!	#NUM!	#NUM!	#NUM!
YER070W	rnr1Y285A	YNL298W	CLA4	#NUM!	#NUM!	#NUM!	#NUM!	#NUM!	#NUM!	#NUM!
YER070W	rnr1Y285A	YNL297C	MON2	#NUM!	#NUM!	#NUM!	#NUM!	#NUM!	#NUM!	#NUM!
YER070W	rnr1Y285A	YNL296W	YNL296W	#NUM!	#NUM!	#NUM!	#NUM!	#NUM!	#NUM!	#NUM!
YER070W	rnr1Y285A	YNL295W	YNL295W	#NUM!	#NUM!	#NUM!	#NUM!	#NUM!	#NUM!	#NUM!
YER070W	rnr1Y285A	YNL294C	RIM21	#NUM!	#NUM!	#NUM!	#NUM!	#NUM!	#NUM!	#NUM!
YER070W	rnr1Y285A	YNL293W	MSB3	#NUM!	#NUM!	#NUM!	#NUM!	#NUM!	#NUM!	#NUM!
YER070W	rnr1Y285A	YNL292W	PUS4	#NUM!	#NUM!	#NUM!	#NUM!	#NUM!	#NUM!	#NUM!
YER070W	rnr1Y285A	YNL291C	MID1	#NUM!	#NUM!	#NUM!	#NUM!	#NUM!	#NUM!	#NUM!
YER070W	rnr1Y285A	YNL318C	HXT14	#NUM!	#NUM!	#NUM!	#NUM!	#NUM!	#NUM!	#NUM!
YER070W	rnr1Y285A	YNL316C	PHA2	#NUM!	#NUM!	#NUM!	#NUM!	#NUM!	#NUM!	#NUM!
YER070W	rnr1Y285A	YNL315C	ATP11	#NUM!	#NUM!	#NUM!	#NUM!	#NUM!	#NUM!	#NUM!
YER070W	rnr1Y285A	YNL314W	DAL82	#NUM!	#NUM!	#NUM!	#NUM!	#NUM!	#NUM!	#NUM!
YER070W	rnr1Y285A	YNL311C	SKP2	#NUM!	#NUM!	#NUM!	#NUM!	#NUM!	#NUM!	#NUM!
YER070W	rnr1Y285A	YNL309W	STB1	#NUM!	#NUM!	#NUM!	#NUM!	#NUM!	#NUM!	#NUM!
YER070W	rnr1Y285A	YNL307C	MCK1	#NUM!	#NUM!	#NUM!	#NUM!	#NUM!	#NUM!	#NUM!
YER070W	rnr1Y285A	YNL305C	BXI1	#NUM!	#NUM!	#NUM!	#NUM!	#NUM!	#NUM!	#NUM!
YER070W	rnr1Y285A	YNL304W	YPT11	#NUM!	#NUM!	#NUM!	#NUM!	#NUM!	#NUM!	#NUM!
YER070W	rnr1Y285A	YNL303W	YNL303W	#NUM!	#NUM!	#NUM!	#NUM!	#NUM!	#NUM!	#NUM!
YER070W	rnr1Y285A	YNL302C	RPS19B	#NUM!	#NUM!	#NUM!	#NUM!	#NUM!	#NUM!	#NUM!
YER070W	rnr1Y285A	YNL329C	PEX6	#NUM!	#NUM!	#NUM!	#NUM!	#NUM!	#NUM!	#NUM!
YER070W	rnr1Y285A	YNL328C	MDJ2	#NUM!	#NUM!	#NUM!	#NUM!	#NUM!	#NUM!	#NUM!
YER070W	rnr1Y285A	YNL327W	EGT2	#NUM!	#NUM!	#NUM!	#NUM!	#NUM!	#NUM!	#NUM!
YER070W	rnr1Y285A	YNL326C	PFA3	#NUM!	#NUM!	#NUM!	#NUM!	#NUM!	#NUM!	#NUM!
YER070W	rnr1Y285A	YNL325C	FIG4	#NUM!	#NUM!	#NUM!	#NUM!	#NUM!	#NUM!	#NUM!
YER070W	rnr1Y285A	YNL324W	YNL324W	#NUM!	#NUM!	#NUM!	#NUM!	#NUM!	#NUM!	#NUM!
YER070W	rnr1Y285A	YNL323W	LEM3	#NUM!	#NUM!	#NUM!	#NUM!	#NUM!	#NUM!	#NUM!
YER070W	rnr1Y285A	YNL322C	KRE1	#NUM!	#NUM!	#NUM!	#NUM!	#NUM!	#NUM!	#NUM!
YER070W	rnr1Y285A	YNL321W	VNX1	#NUM!	#NUM!	#NUM!	#NUM!	#NUM!	#NUM!	#NUM!
YER070W	rnr1Y285A	YNL320W	YNL320W	#NUM!	#NUM!	#NUM!	#NUM!	#NUM!	#NUM!	#NUM!
YER070W	rnr1Y285A	YNL319W	YNL319W	#NUM!	#NUM!	#NUM!	#NUM!	#NUM!	#NUM!	#NUM!
YER070W	rnr1Y285A	YNL338W	YNL338W	#NUM!	#NUM!	#NUM!	#NUM!	#NUM!	#NUM!	#NUM!
YER070W	rnr1Y285A	YNL336W	COS1	#NUM!	#NUM!	#NUM!	#NUM!	#NUM!	#NUM!	#NUM!
YER070W	rnr1Y285A	YNL335W	DDI3	#NUM!	#NUM!	#NUM!	#NUM!	#NUM!	#NUM!	#NUM!
YER070W	rnr1Y285A	YNL333W	SNZ2	#NUM!	#NUM!	#NUM!	#NUM!	#NUM!	#NUM!	#NUM!
YER070W	rnr1Y285A	YNL332W	THI12	#NUM!	#NUM!	#NUM!	#NUM!	#NUM!	#NUM!	#NUM!
YER070W	rnr1Y285A	YDR440W	DOT1	0.26947	0.212	0	0	0.26932	0.212	0.08477
YER070W	rnr1Y285A	YDR514C	YDR514C	0.4728	0.334	0.405	0.402	0.16199	0.334	0.06614
YER070W	rnr1Y285A	YEL013W	VAC8	#NUM!	#NUM!	#NUM!	#NUM!	#NUM!	#NUM!	#NUM!
YER070W	rnr1Y285A	YEL012W	UBC8	#NUM!	#NUM!	#NUM!	#NUM!	#NUM!	#NUM!	#NUM!
YER070W	rnr1Y285A	YEL011W	GLC3	#NUM!	#NUM!	#NUM!	#NUM!	#NUM!	#NUM!	#NUM!
YER070W	rnr1Y285A	YEL010W	YEL010W	#NUM!	#NUM!	#NUM!	#NUM!	#NUM!	#NUM!	#NUM!
YER070W	rnr1Y285A	YEL008W	YEL008W	#NUM!	#NUM!	#NUM!	#NUM!	#NUM!	#NUM!	#NUM!
YER070W	rnr1Y285A	YEL006W	YEA6	#NUM!	#NUM!	#NUM!	#NUM!	#NUM!	#NUM!	#NUM!
YER070W	rnr1Y285A	YEL005C	VAB2	#NUM!	#NUM!	#NUM!	#NUM!	#NUM!	#NUM!	#NUM!
YER070W	rnr1Y285A	YEL004W	YEA4	#NUM!	#NUM!	#NUM!	#NUM!	#NUM!	#NUM!	#NUM!
YER070W	rnr1Y285A	YEL003W	GIM4	#NUM!	#NUM!	#NUM!	#NUM!	#NUM!	#NUM!	#NUM!
YER070W	rnr1Y285A	YEL001C	IRC22	#NUM!	#NUM!	#NUM!	#NUM!	#NUM!	#NUM!	#NUM!
YER070W	rnr1Y285A	YEL031W	SPF1	#NUM!	#NUM!	#NUM!	#NUM!	#NUM!	#NUM!	#NUM!
YER070W	rnr1Y285A	YEL030W	ECM10	#NUM!	#NUM!	#NUM!	#NUM!	#NUM!	#NUM!	#NUM!
YER070W	rnr1Y285A	YEL028W	YEL028W	#NUM!	#NUM!	#NUM!	#NUM!	#NUM!	#NUM!	#NUM!
YER070W	rnr1Y285A	YEL025C	YEL025C	#NUM!	#NUM!	#NUM!	#NUM!	#NUM!	#NUM!	#NUM!
YER070W	rnr1Y285A	YEL023C	YEL023C	#NUM!	#NUM!	#NUM!	#NUM!	#NUM!	#NUM!	#NUM!
YER070W	rnr1Y285A	YEL020C	YEL020C	#NUM!	#NUM!	#NUM!	#NUM!	#NUM!	#NUM!	#NUM!
YER070W	rnr1Y285A	YEL017W	GTT3	#NUM!	#NUM!	#NUM!	#NUM!	#NUM!	#NUM!	#NUM!
YER070W	rnr1Y285A	YEL017C-A	PMP2	#NUM!	#NUM!	#NUM!	#NUM!	#NUM!	#NUM!	#NUM!
YER070W	rnr1Y285A	YEL016C	NPP2	#NUM!	#NUM!	#NUM!	#NUM!	#NUM!	#NUM!	#NUM!
YER070W	rnr1Y285A	YEL015W	EDC3	#NUM!	#NUM!	#NUM!	#NUM!	#NUM!	#NUM!	#NUM!
YER070W	rnr1Y285A	YEL014C	YEL014C	#NUM!	#NUM!	#NUM!	#NUM!	#NUM!	#NUM!	#NUM!
YER070W	rnr1Y285A	YEL049W	PAU2	#NUM!	#NUM!	#NUM!	#NUM!	#NUM!	#NUM!	#NUM!
YER070W	rnr1Y285A	YEL048C	TCA17	#NUM!	#NUM!	#NUM!	#NUM!	#NUM!	#NUM!	#NUM!
YER070W	rnr1Y285A	YEL047C	FRD1	#NUM!	#NUM!	#NUM!	#NUM!	#NUM!	#NUM!	#NUM!
YER070W	rnr1Y285A	YEL043W	YEL043W	#NUM!	#NUM!	#NUM!	#NUM!	#NUM!	#NUM!	#NUM!
YER070W	rnr1Y285A	YEL042W	GDA1	#NUM!	#NUM!	#NUM!	#NUM!	#NUM!	#NUM!	#NUM!
YER070W	rnr1Y285A	YEL041W	YEF1	#NUM!	#NUM!	#NUM!	#NUM!	#NUM!	#NUM!	#NUM!
YER070W	rnr1Y285A	YEL040W	UTR2	#NUM!	#NUM!	#NUM!	#NUM!	#NUM!	#NUM!	#NUM!
YER070W	rnr1Y285A	YEL039C	CYC7	#NUM!	#NUM!	#NUM!	#NUM!	#NUM!	#NUM!	#NUM!
YER070W	rnr1Y285A	YEL038W	UTR4	#NUM!	#NUM!	#NUM!	#NUM!	#NUM!	#NUM!	#NUM!
YER070W	rnr1Y285A	YEL037C	RAD23	#NUM!	#NUM!	#NUM!	#NUM!	#NUM!	#NUM!	#NUM!
YER070W	rnr1Y285A	YEL033W	MTC7	#NUM!	#NUM!	#NUM!	#NUM!	#NUM!	#NUM!	#NUM!
YER070W	rnr1Y285A	YEL059W	YEL059W	#NUM!	#NUM!	#NUM!	#NUM!	#NUM!	#NUM!	#NUM!
YER070W	rnr1Y285A	YEL057C	YEL057C	#NUM!	#NUM!	#NUM!	#NUM!	#NUM!	#NUM!	#NUM!
YER070W	rnr1Y285A	YEL056W	HAT2	#NUM!	#NUM!	#NUM!	#NUM!	#NUM!	#NUM!	#NUM!
YER070W	rnr1Y285A	YEL053C	MAK10	#NUM!	#NUM!	#NUM!	#NUM!	#NUM!	#NUM!	#NUM!
YER070W	rnr1Y285A	YEL052W	AFG1	#NUM!	#NUM!	#NUM!	#NUM!	#NUM!	#NUM!	#NUM!
YER070W	rnr1Y285A	YER010C	YER010C	#NUM!	#NUM!	#NUM!	#NUM!	#NUM!	#NUM!	#NUM!
YER070W	rnr1Y285A	YER007W	PAC2	#NUM!	#NUM!	#NUM!	#NUM!	#NUM!	#NUM!	#NUM!
YER070W	rnr1Y285A	YER007C-A	TMA20	#NUM!	#NUM!	#NUM!	#NUM!	#NUM!	#NUM!	#NUM!
YER070W	rnr1Y285A	YER005W	YND1	#NUM!	#NUM!	#NUM!	#NUM!	#NUM!	#NUM!	#NUM!
YER070W	rnr1Y285A	YER004W	FMP52	#NUM!	#NUM!	#NUM!	#NUM!	#NUM!	#NUM!	#NUM!
YER070W	rnr1Y285A	YER002W	NOP16	#NUM!	#NUM!	#NUM!	#NUM!	#NUM!	#NUM!	#NUM!
YER070W	rnr1Y285A	YER001W	MNN1	#NUM!	#NUM!	#NUM!	#NUM!	#NUM!	#NUM!	#NUM!
YER070W	rnr1Y285A	YEL071W	DLD3	#NUM!	#NUM!	#NUM!	#NUM!	#NUM!	#NUM!	#NUM!
YER070W	rnr1Y285A	YEL068C	YEL068C	#NUM!	#NUM!	#NUM!	#NUM!	#NUM!	#NUM!	#NUM!
YER070W	rnr1Y285A	YEL067C	YEL067C	#NUM!	#NUM!	#NUM!	#NUM!	#NUM!	#NUM!	#NUM!
YER070W	rnr1Y285A	YEL066W	HPA3	#NUM!	#NUM!	#NUM!	#NUM!	#NUM!	#NUM!	#NUM!
YER070W	rnr1Y285A	YER032W	FIR1	#NUM!	#NUM!	#NUM!	#NUM!	#NUM!	#NUM!	#NUM!
YER070W	rnr1Y285A	YER031C	YPT31	#NUM!	#NUM!	#NUM!	#NUM!	#NUM!	#NUM!	#NUM!
YER070W	rnr1Y285A	YER030W	CHZ1	#NUM!	#NUM!	#NUM!	#NUM!	#NUM!	#NUM!	#NUM!
YER070W	rnr1Y285A	YER028C	MIG3	#NUM!	#NUM!	#NUM!	#NUM!	#NUM!	#NUM!	#NUM!
YER070W	rnr1Y285A	YER027C	GAL83	#NUM!	#NUM!	#NUM!	#NUM!	#NUM!	#NUM!	#NUM!
YER070W	rnr1Y285A	YER024W	YAT2	#NUM!	#NUM!	#NUM!	#NUM!	#NUM!	#NUM!	#NUM!
YER070W	rnr1Y285A	YER020W	GPA2	#NUM!	#NUM!	#NUM!	#NUM!	#NUM!	#NUM!	#NUM!
YER070W	rnr1Y285A	YER019W	ISC1	#NUM!	#NUM!	#NUM!	#NUM!	#NUM!	#NUM!	#NUM!
YER070W	rnr1Y285A	YER019C-A	SBH2	#NUM!	#NUM!	#NUM!	#NUM!	#NUM!	#NUM!	#NUM!
YER070W	rnr1Y285A	YER016W	BIM1	#NUM!	#NUM!	#NUM!	#NUM!	#NUM!	#NUM!	#NUM!
YER070W	rnr1Y285A	YER011W	TIR1	#NUM!	#NUM!	#NUM!	#NUM!	#NUM!	#NUM!	#NUM!
YER070W	rnr1Y285A	YER046W	SPO73	#NUM!	#NUM!	#NUM!	#NUM!	#NUM!	#NUM!	#NUM!
YER070W	rnr1Y285A	YER045C	ACA1	#NUM!	#NUM!	#NUM!	#NUM!	#NUM!	#NUM!	#NUM!
YER070W	rnr1Y285A	YER044C-A	MEI4	#NUM!	#NUM!	#NUM!	#NUM!	#NUM!	#NUM!	#NUM!
YER070W	rnr1Y285A	YER042W	MXR1	#NUM!	#NUM!	#NUM!	#NUM!	#NUM!	#NUM!	#NUM!
YER070W	rnr1Y285A	YER039C-A	YER039C-A	#NUM!	#NUM!	#NUM!	#NUM!	#NUM!	#NUM!	#NUM!
YER070W	rnr1Y285A	YER041W	YEN1	#NUM!	#NUM!	#NUM!	#NUM!	#NUM!	#NUM!	#NUM!
YER070W	rnr1Y285A	YER039C	HVG1	#NUM!	#NUM!	#NUM!	#NUM!	#NUM!	#NUM!	#NUM!
YER070W	rnr1Y285A	YER038W-A	YER038W-A	#NUM!	#NUM!	#NUM!	#NUM!	#NUM!	#NUM!	#NUM!
YER070W	rnr1Y285A	YER035W	EDC2	#NUM!	#NUM!	#NUM!	#NUM!	#NUM!	#NUM!	#NUM!
YER070W	rnr1Y285A	YER034W	YER034W	#NUM!	#NUM!	#NUM!	#NUM!	#NUM!	#NUM!	#NUM!
YER070W	rnr1Y285A	YER033C	ZRG8	#NUM!	#NUM!	#NUM!	#NUM!	#NUM!	#NUM!	#NUM!
YER070W	rnr1Y285A	YER056C	FCY2	#NUM!	#NUM!	#NUM!	#NUM!	#NUM!	#NUM!	#NUM!
YER070W	rnr1Y285A	YER054C	GIP2	#NUM!	#NUM!	#NUM!	#NUM!	#NUM!	#NUM!	#NUM!
YER070W	rnr1Y285A	YER053C	PIC2	#NUM!	#NUM!	#NUM!	#NUM!	#NUM!	#NUM!	#NUM!
YER070W	rnr1Y285A	YER052C	HOM3	#NUM!	#NUM!	#NUM!	#NUM!	#NUM!	#NUM!	#NUM!
YER070W	rnr1Y285A	YER051W	JHD1	#NUM!	#NUM!	#NUM!	#NUM!	#NUM!	#NUM!	#NUM!
YER070W	rnr1Y285A	YER049W	TPA1	#NUM!	#NUM!	#NUM!	#NUM!	#NUM!	#NUM!	#NUM!
YER070W	rnr1Y285A	YER048C	CAJ1	#NUM!	#NUM!	#NUM!	#NUM!	#NUM!	#NUM!	#NUM!
YER070W	rnr1Y285A	YER047C	SAP1	#NUM!	#NUM!	#NUM!	#NUM!	#NUM!	#NUM!	#NUM!
YER070W	rnr1Y285A	YER046W-A	YER046W-A	#NUM!	#NUM!	#NUM!	#NUM!	#NUM!	#NUM!	#NUM!
YER070W	rnr1Y285A	YER066W	RRT13	#NUM!	#NUM!	#NUM!	#NUM!	#NUM!	#NUM!	#NUM!
YER070W	rnr1Y285A	YER066C-A	YER066C-A	#NUM!	#NUM!	#NUM!	#NUM!	#NUM!	#NUM!	#NUM!
YER070W	rnr1Y285A	YER065C	ICL1	#NUM!	#NUM!	#NUM!	#NUM!	#NUM!	#NUM!	#NUM!
YER070W	rnr1Y285A	YER064C	VHR2	#NUM!	#NUM!	#NUM!	#NUM!	#NUM!	#NUM!	#NUM!
YER070W	rnr1Y285A	YER063W	THO1	#NUM!	#NUM!	#NUM!	#NUM!	#NUM!	#NUM!	#NUM!
YER070W	rnr1Y285A	YER062C	HOR2	#NUM!	#NUM!	#NUM!	#NUM!	#NUM!	#NUM!	#NUM!
YER070W	rnr1Y285A	YER061C	CEM1	#NUM!	#NUM!	#NUM!	#NUM!	#NUM!	#NUM!	#NUM!
YER070W	rnr1Y285A	YER060W	FCY21	#NUM!	#NUM!	#NUM!	#NUM!	#NUM!	#NUM!	#NUM!
YER070W	rnr1Y285A	YER059W	PCL6	#NUM!	#NUM!	#NUM!	#NUM!	#NUM!	#NUM!	#NUM!
YER070W	rnr1Y285A	YER079W	YER079W	#NUM!	#NUM!	#NUM!	#NUM!	#NUM!	#NUM!	#NUM!
YER070W	rnr1Y285A	YER078C	ICP55	#NUM!	#NUM!	#NUM!	#NUM!	#NUM!	#NUM!	#NUM!
YER070W	rnr1Y285A	YER075C	PTP3	#NUM!	#NUM!	#NUM!	#NUM!	#NUM!	#NUM!	#NUM!
YER070W	rnr1Y285A	YER074W	RPS24A	#NUM!	#NUM!	#NUM!	#NUM!	#NUM!	#NUM!	#NUM!
YER070W	rnr1Y285A	YER073W	ALD5	#NUM!	#NUM!	#NUM!	#NUM!	#NUM!	#NUM!	#NUM!
YER070W	rnr1Y285A	YER072W	VTC1	#NUM!	#NUM!	#NUM!	#NUM!	#NUM!	#NUM!	#NUM!
YER070W	rnr1Y285A	YER071C	TDA2	#NUM!	#NUM!	#NUM!	#NUM!	#NUM!	#NUM!	#NUM!
YER070W	rnr1Y285A	YER067W	RGI1	#NUM!	#NUM!	#NUM!	#NUM!	#NUM!	#NUM!	#NUM!
YER070W	rnr1Y285A	YER067C-A	YER067C-A	#NUM!	#NUM!	#NUM!	#NUM!	#NUM!	#NUM!	#NUM!
YER070W	rnr1Y285A	YER092W	IES5	#NUM!	#NUM!	#NUM!	#NUM!	#NUM!	#NUM!	#NUM!
YER070W	rnr1Y285A	YER091C-A	YER091C-A	#NUM!	#NUM!	#NUM!	#NUM!	#NUM!	#NUM!	#NUM!
YER070W	rnr1Y285A	YER091C	MET6	#NUM!	#NUM!	#NUM!	#NUM!	#NUM!	#NUM!	#NUM!
YER070W	rnr1Y285A	YER090W	TRP2	#NUM!	#NUM!	#NUM!	#NUM!	#NUM!	#NUM!	#NUM!
YER070W	rnr1Y285A	YER088C	DOT6	#NUM!	#NUM!	#NUM!	#NUM!	#NUM!	#NUM!	#NUM!
YER070W	rnr1Y285A	YER087C-A	YER087C-A	#NUM!	#NUM!	#NUM!	#NUM!	#NUM!	#NUM!	#NUM!
YER070W	rnr1Y285A	YER085C	YER085C	#NUM!	#NUM!	#NUM!	#NUM!	#NUM!	#NUM!	#NUM!
YER070W	rnr1Y285A	YER084W	YER084W	#NUM!	#NUM!	#NUM!	#NUM!	#NUM!	#NUM!	#NUM!
YER070W	rnr1Y285A	YER083C	GET2	#NUM!	#NUM!	#NUM!	#NUM!	#NUM!	#NUM!	#NUM!
YER070W	rnr1Y285A	YER081W	SER3	#NUM!	#NUM!	#NUM!	#NUM!	#NUM!	#NUM!	#NUM!
YER070W	rnr1Y285A	YER080W	AIM9	#NUM!	#NUM!	#NUM!	#NUM!	#NUM!	#NUM!	#NUM!
YER070W	rnr1Y285A	YER113C	TMN3	#NUM!	#NUM!	#NUM!	#NUM!	#NUM!	#NUM!	#NUM!
YER070W	rnr1Y285A	YER111C	SWI4	#NUM!	#NUM!	#NUM!	#NUM!	#NUM!	#NUM!	#NUM!
YER070W	rnr1Y285A	YER109C	FLO8	#NUM!	#NUM!	#NUM!	#NUM!	#NUM!	#NUM!	#NUM!
YER070W	rnr1Y285A	YER108C	YER108C	#NUM!	#NUM!	#NUM!	#NUM!	#NUM!	#NUM!	#NUM!
YER070W	rnr1Y285A	YER106W	MAM1	#NUM!	#NUM!	#NUM!	#NUM!	#NUM!	#NUM!	#NUM!
YER070W	rnr1Y285A	YER101C	AST2	#NUM!	#NUM!	#NUM!	#NUM!	#NUM!	#NUM!	#NUM!
YER070W	rnr1Y285A	YER098W	UBP9	#NUM!	#NUM!	#NUM!	#NUM!	#NUM!	#NUM!	#NUM!
YER070W	rnr1Y285A	YER097W	YER097W	#NUM!	#NUM!	#NUM!	#NUM!	#NUM!	#NUM!	#NUM!
YER070W	rnr1Y285A	YER096W	SHC1	#NUM!	#NUM!	#NUM!	#NUM!	#NUM!	#NUM!	#NUM!
YER070W	rnr1Y285A	YER095W	RAD51	#NUM!	#NUM!	#NUM!	#NUM!	#NUM!	#NUM!	#NUM!
YER070W	rnr1Y285A	YER093C-A	AIM11	#NUM!	#NUM!	#NUM!	#NUM!	#NUM!	#NUM!	#NUM!
YER070W	rnr1Y285A	YER124C	DSE1	#NUM!	#NUM!	#NUM!	#NUM!	#NUM!	#NUM!	#NUM!
YER070W	rnr1Y285A	YER123W	YCK3	#NUM!	#NUM!	#NUM!	#NUM!	#NUM!	#NUM!	#NUM!
YER070W	rnr1Y285A	YER121W	YER121W	#NUM!	#NUM!	#NUM!	#NUM!	#NUM!	#NUM!	#NUM!
YER070W	rnr1Y285A	YER120W	SCS2	#NUM!	#NUM!	#NUM!	#NUM!	#NUM!	#NUM!	#NUM!
YER070W	rnr1Y285A	YER119C-A	YER119C-A	#NUM!	#NUM!	#NUM!	#NUM!	#NUM!	#NUM!	#NUM!
YER070W	rnr1Y285A	YER119C	AVT6	#NUM!	#NUM!	#NUM!	#NUM!	#NUM!	#NUM!	#NUM!
YER070W	rnr1Y285A	YER118C	SHO1	#NUM!	#NUM!	#NUM!	#NUM!	#NUM!	#NUM!	#NUM!
YER070W	rnr1Y285A	YER116C	SLX8	#NUM!	#NUM!	#NUM!	#NUM!	#NUM!	#NUM!	#NUM!
YER070W	rnr1Y285A	YER115C	SPR6	#NUM!	#NUM!	#NUM!	#NUM!	#NUM!	#NUM!	#NUM!
YER070W	rnr1Y285A	YER114C	BOI2	#NUM!	#NUM!	#NUM!	#NUM!	#NUM!	#NUM!	#NUM!
YER070W	rnr1Y285A	YER142C	MAG1	#NUM!	#NUM!	#NUM!	#NUM!	#NUM!	#NUM!	#NUM!
YER070W	rnr1Y285A	YER140W	YER140W	#NUM!	#NUM!	#NUM!	#NUM!	#NUM!	#NUM!	#NUM!
YER070W	rnr1Y285A	YER139C	RTR1	#NUM!	#NUM!	#NUM!	#NUM!	#NUM!	#NUM!	#NUM!
YER070W	rnr1Y285A	YER137C	YER137C	#NUM!	#NUM!	#NUM!	#NUM!	#NUM!	#NUM!	#NUM!
YER070W	rnr1Y285A	YER135C	YER135C	#NUM!	#NUM!	#NUM!	#NUM!	#NUM!	#NUM!	#NUM!
YER070W	rnr1Y285A	YER134C	YER134C	#NUM!	#NUM!	#NUM!	#NUM!	#NUM!	#NUM!	#NUM!
YER070W	rnr1Y285A	YER132C	PMD1	#NUM!	#NUM!	#NUM!	#NUM!	#NUM!	#NUM!	#NUM!
YER070W	rnr1Y285A	YER131W	RPS26B	#NUM!	#NUM!	#NUM!	#NUM!	#NUM!	#NUM!	#NUM!
YER070W	rnr1Y285A	YER130C	YER130C	#NUM!	#NUM!	#NUM!	#NUM!	#NUM!	#NUM!	#NUM!
YER070W	rnr1Y285A	YER129W	SAK1	#NUM!	#NUM!	#NUM!	#NUM!	#NUM!	#NUM!	#NUM!
YER070W	rnr1Y285A	YER128W	VFA1	#NUM!	#NUM!	#NUM!	#NUM!	#NUM!	#NUM!	#NUM!
YER070W	rnr1Y285A	YER158C	YER158C	#NUM!	#NUM!	#NUM!	#NUM!	#NUM!	#NUM!	#NUM!
YER070W	rnr1Y285A	YER156C	YER156C	#NUM!	#NUM!	#NUM!	#NUM!	#NUM!	#NUM!	#NUM!
YER070W	rnr1Y285A	YER155C	BEM2	#NUM!	#NUM!	#NUM!	#NUM!	#NUM!	#NUM!	#NUM!
YER070W	rnr1Y285A	YER153C	PET122	#NUM!	#NUM!	#NUM!	#NUM!	#NUM!	#NUM!	#NUM!
YER070W	rnr1Y285A	YER152C	YER152C	#NUM!	#NUM!	#NUM!	#NUM!	#NUM!	#NUM!	#NUM!
YER070W	rnr1Y285A	YER151C	UBP3	#NUM!	#NUM!	#NUM!	#NUM!	#NUM!	#NUM!	#NUM!
YER070W	rnr1Y285A	YER150W	SPI1	#NUM!	#NUM!	#NUM!	#NUM!	#NUM!	#NUM!	#NUM!
YER070W	rnr1Y285A	YER149C	PEA2	#NUM!	#NUM!	#NUM!	#NUM!	#NUM!	#NUM!	#NUM!
YER070W	rnr1Y285A	YER145C	FTR1	#NUM!	#NUM!	#NUM!	#NUM!	#NUM!	#NUM!	#NUM!
YER070W	rnr1Y285A	YER144C	UBP5	#NUM!	#NUM!	#NUM!	#NUM!	#NUM!	#NUM!	#NUM!
YER070W	rnr1Y285A	YER143W	DDI1	#NUM!	#NUM!	#NUM!	#NUM!	#NUM!	#NUM!	#NUM!
YER070W	rnr1Y285A	YER162C	RAD4	0.19348	0.181	0.41467	0.172	-0.21862	0.181	0.12255
YER070W	rnr1Y285A	YER161C	SPT2	#NUM!	#NUM!	#NUM!	#NUM!	#NUM!	#NUM!	#NUM!
YER070W	rnr1Y285A	YDR359C	EAF1	0.00311	0.005	0	0	0.00311	0.005	0.42265
YER070W	rnr1Y285A	YDL223C	HBT1	0.00021	0	0.29736	0.346	-0.27122	0	0.42265
YER070W	rnr1Y285A	YBR106W	PHO88	0	0	0	0	0	0	#NUM!
YER070W	rnr1Y285A	YGL045W	RIM8	0	0	0	0	0	0	#NUM!
YER070W	rnr1Y285A	YGL081W	YGL081W	0.31432	0.387	0	0	0.31415	0.387	0.20279
YER070W	rnr1Y285A	YGL105W	ARC1	0.25239	0.225	0.12817	0.002	0.12334	0.225	0.11085
YER070W	rnr1Y285A	YGL147C	RPL9A	0	0	0	0	0	0	#NUM!
YER070W	rnr1Y285A	YGR019W	UGA1	0	0	0.22535	0.26	-0.2249	0	#NUM!
YER070W	rnr1Y285A	YML102C-A	YML102C-A	0	0	0	0	0	0	#NUM!
YER070W	rnr1Y285A	YMR008C	PLB1	1.04399	0.016	1.04442	0.006	0	0.016	0
YER070W	rnr1Y285A	YMR031W-A	YMR031W-A	0.47442	0.323	0.64652	0.255	-0.1142	0.322	0.06042
YER070W	rnr1Y285A	YMR088C	VBA1	0.08648	0.15	0.21321	0.273	-0.05402	0.15	0.42265
YER070W	rnr1Y285A	YMR161W	HLJ1	0	0	0	0	0	0	#NUM!
YER070W	rnr1Y285A	YMR198W	CIK1	0	0	0	0	0	0	#NUM!
YER070W	rnr1Y285A	YMR224C	MRE11	0.16679	0.135	0.20176	0.097	-0.02657	0.134	0.08929
YER070W	rnr1Y285A	YMR237W	BCH1	0	0	0	0	0	0	#NUM!
YER070W	rnr1Y285A	YIL159W	BNR1	0	0	0	0	0	0	#NUM!
YER070W	rnr1Y285A	YPL261C	YPL261C	0.07365	0.067	0.43502	0.229	-0.30296	0.067	0.1969
YER070W	rnr1Y285A	YGR061C	ADE6	0	0	0	0	0	0	#NUM!
YER070W	rnr1Y285A	YIL125W	KGD1	0.24312	0.269	0.15949	0.138	0.06325	0.269	0.16855
YER070W	rnr1Y285A	YML129C	COX14	0.09088	0.102	0.15923	0.185	-0.05722	0.102	0.17246
YER070W	rnr1Y285A	YER089C	PTC2	#NUM!	#NUM!	#NUM!	#NUM!	#NUM!	#NUM!	#NUM!
YER070W	rnr1Y285A	YFL010C	WWM1	0.53276	0.42	0.40781	0.471	0.13869	0.42	0.08503
YER070W	rnr1Y285A	YNL284C	MRPL10	#NUM!	#NUM!	#NUM!	#NUM!	#NUM!	#NUM!	#NUM!
YER070W	rnr1Y285A	YOR202W	HIS3	1.00243	0.079	0.99481	0.103	1e-05	0.079	0
YER070W	rnr1Y285A	YOR202W	HIS3	1.00197	0.087	1.00427	0.088	4e-05	0.087	0
YER070W	rnr1Y285A	YOR276W	CAF20	1.0491	0.011	1.0475	0.015	6e-05	0.011	4e-05
YER070W	rnr1Y285A	YKL115C	YKL115C	1.00304	0.057	1.0008	0.032	8e-05	0.057	5e-05
YER070W	rnr1Y285A	YPL273W	SAM4	1.05002	0.02	1.0488	0.009	0.00012	0.02	0
YER070W	rnr1Y285A	YHR124W	NDT80	0.99133	0.004	0.99032	0.01	0.00014	0.004	0
[truncated: 2,131 more rows]

## Sheet: Table S5. rnr1Y285F x DMA
Table S5. rnr1Y285F x deletion mutant array raw SGA data
Query ORF	Query Name	Array ORF	Array Name	Normalized colony size (rnr1Y285A)	Normalized colony std. dev. (rnr1Y285A)	Normalized colony size (ura3∆)	Normalized colony std. dev. (ura3∆)	Score (epsilon)	Score stdev	p-Value
YER070W	rnr1Y285F	YDR080W	VPS41	0.29397	0.156	0.68114	0.576	-0.29693	0.156	0.03272
YER070W	rnr1Y285F	YJR077C	MIR1	0.40816	0.101	0.71919	0.252	-0.26964	0.1	0.0039
YER070W	rnr1Y285F	YLR168C	UPS2	0.7436	0.098	1.00271	0.041	-0.25955	0.098	0.00062
YER070W	rnr1Y285F	YOR358W	HAP5	0.4237	0.21	0.68843	0.165	-0.23861	0.21	0.02728
YER070W	rnr1Y285F	YNL121C	TOM70	0.71904	0.119	0.91723	0.097	-0.21052	0.119	0.00122
YER070W	rnr1Y285F	YDL082W	RPL13A	0.48466	0.242	0.6689	0.131	-0.20361	0.242	0.02795
YER070W	rnr1Y285F	YDR057W	YOS9	0.6238	0.279	0.80624	0.193	-0.20287	0.279	0.02088
YER070W	rnr1Y285F	YPR189W	SKI3	0.80135	0.02	1.00509	0.015	-0.20221	0.02	0.0002
YER070W	rnr1Y285F	YOR366W	YOR366W	0.87565	0.069	1.07931	0.011	-0.20174	0.069	0.00207
YER070W	rnr1Y285F	YML131W	YML131W	0.84257	0.085	1.02415	0.021	-0.18178	0.085	0.00028
YER070W	rnr1Y285F	YDL070W	BDF2	0.79254	0.157	0.98493	0.039	-0.17632	0.157	0.00208
YER070W	rnr1Y285F	YHR008C	SOD2	0.74845	0.085	0.91024	0.028	-0.15937	0.085	0.0004
YER070W	rnr1Y285F	YOR082C	YOR082C	0.73223	0.141	0.87944	0.022	-0.15728	0.141	0.00192
YER070W	rnr1Y285F	YMR201C	RAD14	0.33152	0.147	0.47495	0.038	-0.15595	0.147	0.02022
YER070W	rnr1Y285F	YNL050C	YNL050C	0.86297	0.061	1.01831	0.015	-0.15587	0.061	0.0001
YER070W	rnr1Y285F	YOR379C	YOR379C	0.85613	0.025	1.01121	0.009	-0.15565	0.025	0.00028
YER070W	rnr1Y285F	YDR219C	MFB1	0.76426	0.03	0.92031	0.038	-0.15288	0.03	2e-05
YER070W	rnr1Y285F	YDR269C	YDR269C	0.82995	0.018	0.98055	0.013	-0.15286	0.018	0
YER070W	rnr1Y285F	YGR007W	ECT1	0.86044	0.058	1.01219	0.005	-0.15132	0.058	8e-05
YER070W	rnr1Y285F	YLR178C	TFS1	0.93168	0.016	1.07269	0.024	-0.14754	0.016	0.0001
YER070W	rnr1Y285F	YAL034C	FUN19	0.83928	0.152	0.98254	0.02	-0.14237	0.152	0.00159
YER070W	rnr1Y285F	YMR291W	TDA1	0.83993	0.295	0.97997	0.077	-0.13869	0.294	0.01069
YER070W	rnr1Y285F	YDL006W	PTC1	0.29586	0.064	0.43723	0.043	-0.134	0.064	0.00268
YER070W	rnr1Y285F	YOR247W	SRL1	0.88392	0.106	1.01252	0.013	-0.13003	0.106	0.00046
YER070W	rnr1Y285F	YFL020C	PAU5	0.89314	0.008	1.01681	0.015	-0.12696	0.008	0
YER070W	rnr1Y285F	YLR278C	YLR278C	0.93382	0.027	1.06499	0.044	-0.12398	0.027	1e-05
YER070W	rnr1Y285F	YOR359W	VTS1	0.78864	0.058	0.91346	0.005	-0.12379	0.058	0.00011
YER070W	rnr1Y285F	YLR407W	YLR407W	0.91583	0.053	1.04239	0.016	-0.12337	0.053	5e-05
YER070W	rnr1Y285F	YGL136C	MRM2	0.2924	0.028	0.46269	0.087	-0.12161	0.028	0.00296
YER070W	rnr1Y285F	YJL120W	YJL120W	0.8338	0.045	0.95769	0.031	-0.12085	0.045	0.00096
YER070W	rnr1Y285F	YKR082W	NUP133	0.37601	0.018	0.48684	0.046	-0.11668	0.018	0.00076
YER070W	rnr1Y285F	YGL237C	HAP2	0.62376	0.334	0.68901	0.185	-0.11364	0.333	0.03333
YER070W	rnr1Y285F	YML016C	PPZ1	0.94593	0.022	1.05661	0.026	-0.11353	0.022	0
YER070W	rnr1Y285F	YPL159C	PET20	0.91978	0.074	1.03453	0.051	-0.11087	0.074	0.00015
YER070W	rnr1Y285F	YMR012W	CLU1	0.93283	0.017	1.03777	0.045	-0.10851	0.017	0.00012
YER070W	rnr1Y285F	YOR220W	RCN2	0.887	0.035	0.99361	0.036	-0.10745	0.035	2e-05
YER070W	rnr1Y285F	YLR083C	EMP70	1.00897	0.046	1.11512	0.009	-0.10737	0.046	3e-05
YER070W	rnr1Y285F	YLR428C	YLR428C	0.88486	0.017	0.98971	0.012	-0.10689	0.017	0.00012
YER070W	rnr1Y285F	YGR037C	ACB1	0.64916	0.023	0.73698	0.091	-0.10651	0.023	0.00043
YER070W	rnr1Y285F	YLR418C	CDC73	0.58311	0.078	0.69164	0.019	-0.10477	0.078	0.00589
YER070W	rnr1Y285F	YNL010W	YNL010W	0.90886	0.156	0.99669	0.086	-0.10468	0.156	0.00137
YER070W	rnr1Y285F	YNL004W	HRB1	1.04996	0.012	1.15709	0.007	-0.10414	0.012	0
YER070W	rnr1Y285F	YPL263C	KEL3	0.90509	0.008	1.00208	0.031	-0.10397	0.008	2e-05
YER070W	rnr1Y285F	YDR084C	TVP23	0.96857	0.119	1.07932	0.015	-0.10391	0.119	0.0005
YER070W	rnr1Y285F	YMR266W	RSN1	0.86481	0.04	0.96934	0.003	-0.10358	0.04	3e-05
YER070W	rnr1Y285F	YDR107C	TMN2	0.92125	0.036	1.02982	0.052	-0.10354	0.036	2e-05
YER070W	rnr1Y285F	YDR444W	YDR444W	0.99319	0.01	1.09551	0.021	-0.10266	0.01	3e-05
YER070W	rnr1Y285F	YMR037C	MSN2	0.91153	0.027	1.00858	0.022	-0.10249	0.027	0.0003
YER070W	rnr1Y285F	YBR176W	ECM31	0.35982	0.029	0.4449	0.067	-0.10198	0.029	0.0022
YER070W	rnr1Y285F	YKL023W	YKL023W	0.86543	0.029	0.96978	0.015	-0.10152	0.029	1e-05
YER070W	rnr1Y285F	YNL034W	YNL034W	0.902	0.04	1.00105	0.004	-0.10121	0.04	2e-05
YER070W	rnr1Y285F	YDR121W	DPB4	0.94833	0.024	1.04591	0.042	-0.10052	0.024	0
YER070W	rnr1Y285F	YDR210W	YDR210W	0.96436	0.028	1.0683	0.02	-0.09953	0.028	1e-05
YER070W	rnr1Y285F	YDL002C	NHP10	0.61905	0.037	0.71146	0.04	-0.09888	0.037	6e-05
YER070W	rnr1Y285F	YOR162C	YRR1	0.93338	0.008	1.02957	0.007	-0.09771	0.008	2e-05
YER070W	rnr1Y285F	YDL077C	VAM6	0.22402	0.007	0.31486	0.088	-0.09538	0.007	0.00034
YER070W	rnr1Y285F	YLR036C	YLR036C	0.96621	0.041	1.06106	0.017	-0.0947	0.041	2e-05
YER070W	rnr1Y285F	YOR377W	ATF1	0.96491	0.007	1.05964	0.006	-0.09321	0.007	2e-05
YER070W	rnr1Y285F	YDR151C	CTH1	0.95924	0.02	1.04946	0.031	-0.09315	0.02	0
YER070W	rnr1Y285F	YLR413W	YLR413W	0.99591	0.033	1.07588	0.025	-0.09238	0.033	1e-05
YER070W	rnr1Y285F	YOL095C	HMI1	0.83418	0.025	0.92524	0.021	-0.092	0.025	0.00031
YER070W	rnr1Y285F	YNR074C	AIF1	0.93446	0.021	1.0262	0.038	-0.0918	0.021	0
YER070W	rnr1Y285F	YPL047W	SGF11	0.85125	0.015	0.95415	0.056	-0.09146	0.015	0.0001
YER070W	rnr1Y285F	YLL020C	YLL020C	0.9095	0.005	1.00017	0.015	-0.09116	0.005	1e-05
YER070W	rnr1Y285F	YCL009C	ILV6	0.92317	0.045	1.01797	0.011	-0.09106	0.045	3e-05
YER070W	rnr1Y285F	YDR061W	YDR061W	0.9721	0.046	1.06569	0.03	-0.09002	0.046	3e-05
YER070W	rnr1Y285F	YOR314W	YOR314W	0.92758	0.006	1.01777	0.001	-0.08979	0.006	2e-05
YER070W	rnr1Y285F	YMR060C	SAM37	0.85664	0.031	0.94434	0.008	-0.08894	0.031	1e-05
YER070W	rnr1Y285F	YDR285W	ZIP1	0.97528	0.047	1.05973	0.04	-0.08756	0.047	3e-05
YER070W	rnr1Y285F	YMR154C	RIM13	0.86952	0.017	0.95428	0.021	-0.08688	0.017	0
YER070W	rnr1Y285F	YCR089W	FIG2	0.87698	0.109	0.96318	0.026	-0.08601	0.109	0.00052
YER070W	rnr1Y285F	YOR024W	YOR024W	0.97489	0.005	1.06324	0.016	-0.08584	0.005	1e-05
YER070W	rnr1Y285F	YKL129C	MYO3	0.90911	0.032	0.99719	0.022	-0.08559	0.032	1e-05
YER070W	rnr1Y285F	YJR110W	YMR1	0.99428	0.026	1.07551	0.017	-0.08496	0.026	0
YER070W	rnr1Y285F	YML013W	UBX2	0.85587	0.035	0.94506	0.019	-0.08471	0.035	0.00056
YER070W	rnr1Y285F	YKR040C	YKR040C	0.85853	0.075	0.94193	0.09	-0.08456	0.075	0.00018
YER070W	rnr1Y285F	YMR245W	YMR245W	0.88037	0.228	0.96517	0.076	-0.08402	0.227	0.00449
YER070W	rnr1Y285F	YMR044W	IOC4	1.00235	0.049	1.09421	0.022	-0.08379	0.049	3e-05
YER070W	rnr1Y285F	YLR303W	MET17	0.88515	0.093	0.974	0.023	-0.08341	0.093	0.00031
YER070W	rnr1Y285F	YKL033W-A	YKL033W-A	0.98769	0.04	1.06931	0.01	-0.08331	0.04	2e-05
YER070W	rnr1Y285F	YLL041C	SDH2	0.7921	0.028	0.82138	0.227	-0.08314	0.028	0.00041
YER070W	rnr1Y285F	YGL046W	YGL046W	0.82273	0.024	0.90267	0.028	-0.0825	0.024	1e-05
YER070W	rnr1Y285F	YGL021W	ALK1	0.97376	0.014	1.0519	0.033	-0.08248	0.014	0
YER070W	rnr1Y285F	YLR194C	YLR194C	0.9397	0.078	1.0268	0.028	-0.08196	0.078	0.00016
YER070W	rnr1Y285F	YJR154W	YJR154W	0.97065	0.011	1.04701	0.044	-0.08154	0.011	4e-05
YER070W	rnr1Y285F	YBR231C	SWC5	0.62507	0.105	0.69506	0.152	-0.08146	0.105	0.00129
YER070W	rnr1Y285F	YKL156W	RPS27A	0.99307	0.013	1.07384	0.007	-0.08124	0.013	0
YER070W	rnr1Y285F	YNL143C	YNL143C	0.93157	0.011	1.01389	0.015	-0.08082	0.011	4e-05
YER070W	rnr1Y285F	YIR031C	DAL7	0.98768	0.059	1.06314	0.029	-0.08054	0.059	6e-05
YER070W	rnr1Y285F	YNL032W	SIW14	0.83232	0.01	0.91268	0.005	-0.08046	0.01	5e-05
YER070W	rnr1Y285F	YGR129W	SYF2	0.95203	0.019	1.03281	0.023	-0.07892	0.019	0.00014
YER070W	rnr1Y285F	YNL120C	YNL120C	0.86748	0.02	0.94815	0.027	-0.07764	0.02	0
YER070W	rnr1Y285F	YHR110W	ERP5	0.97465	0.042	1.06009	0.04	-0.07751	0.042	2e-05
YER070W	rnr1Y285F	YHR154W	RTT107	0.88423	0.067	0.95961	0.033	-0.07726	0.067	0.00012
YER070W	rnr1Y285F	YKL043W	PHD1	1.03655	0.026	1.11552	0.012	-0.07702	0.026	0
YER070W	rnr1Y285F	YDR340W	YDR340W	0.96029	0.01	1.03723	0.002	-0.07557	0.01	0
YER070W	rnr1Y285F	YLR326W	YLR326W	0.99579	0.003	1.06766	0.03	-0.0754	0.003	0
YER070W	rnr1Y285F	YOL007C	CSI2	0.93665	0.009	1.00896	0.005	-0.07515	0.009	3e-05
YER070W	rnr1Y285F	YKR024C	DBP7	0.85445	0.014	0.92943	0.025	-0.07494	0.014	0
YER070W	rnr1Y285F	YOR078W	BUD21	0.4242	0.002	0.48784	0.039	-0.07474	0.002	1e-05
YER070W	rnr1Y285F	YOL101C	IZH4	0.97042	0.037	1.04449	0.03	-0.07449	0.037	2e-05
YER070W	rnr1Y285F	YNR073C	YNR073C	1.01712	0.056	1.09345	0.018	-0.07431	0.056	5e-05
YER070W	rnr1Y285F	YCR071C	IMG2	0.7229	0.028	0.79725	0.018	-0.07416	0.028	2e-05
YER070W	rnr1Y285F	YDL024C	DIA3	0.99314	0.012	1.06755	0.003	-0.07366	0.012	0
YER070W	rnr1Y285F	YAL018C	YAL018C	1.01137	0.079	1.08645	0.008	-0.07363	0.079	0.00013
YER070W	rnr1Y285F	YKR031C	SPO14	0.76107	0.007	0.83594	0.007	-0.07351	0.007	3e-05
YER070W	rnr1Y285F	YNL008C	ASI3	1.09708	0.022	1.1626	0.048	-0.07312	0.022	0
YER070W	rnr1Y285F	YPL092W	SSU1	0.95	0.07	1.02004	0.01	-0.07277	0.07	0.00011
YER070W	rnr1Y285F	YNL003C	PET8	1.06544	0.028	1.136	0.02	-0.07266	0.028	0
YER070W	rnr1Y285F	YKL218C	SRY1	1.03518	0.005	1.10806	0.01	-0.07244	0.005	1e-05
YER070W	rnr1Y285F	YIL140W	AXL2	0.95767	0.006	1.03135	0.014	-0.0724	0.006	1e-05
YER070W	rnr1Y285F	YLR315W	NKP2	0.7896	0.021	0.85852	0.023	-0.07239	0.021	0
YER070W	rnr1Y285F	YJL141C	YAK1	0.9447	0.035	1.01544	0.003	-0.07125	0.035	1e-05
YER070W	rnr1Y285F	YPL219W	PCL8	1.0239	0.037	1.08839	0.012	-0.07103	0.037	1e-05
YER070W	rnr1Y285F	YDL222C	FMP45	0.92932	0.036	1.00238	0.016	-0.0708	0.036	2e-05
YER070W	rnr1Y285F	YIL057C	RGI2	0.99383	0.057	1.05808	0.052	-0.07037	0.057	5e-05
YER070W	rnr1Y285F	YKR018C	YKR018C	1.00712	0.011	1.07214	0.035	-0.07031	0.011	4e-05
YER070W	rnr1Y285F	YGR182C	YGR182C	0.9994	0.025	1.07438	0.032	-0.07014	0.025	0
YER070W	rnr1Y285F	YOR265W	RBL2	0.92019	0.033	1.00025	0.018	-0.07007	0.033	1e-05
YER070W	rnr1Y285F	YDR099W	BMH2	0.90941	0.028	0.9807	0.017	-0.06865	0.028	1e-05
YER070W	rnr1Y285F	YML035C-A	YML035C-A	1.05578	0.014	1.12278	0.021	-0.06804	0.014	0
YER070W	rnr1Y285F	YMR020W	FMS1	0.85652	0.005	0.92581	0.022	-0.06802	0.005	1e-05
YER070W	rnr1Y285F	YML037C	YML037C	1.04444	0.013	1.11012	0.007	-0.06799	0.013	0
YER070W	rnr1Y285F	YPL259C	APM1	1.00254	0.025	1.06869	0.027	-0.06797	0.025	0
YER070W	rnr1Y285F	YKR102W	FLO10	0.99093	0.01	1.05871	0.005	-0.0677	0.01	0
YER070W	rnr1Y285F	YGR078C	PAC10	0.90839	0.028	0.9833	0.016	-0.06688	0.028	1e-05
YER070W	rnr1Y285F	YNL064C	YDJ1	0.59985	0.02	0.66695	0.007	-0.06668	0.02	1e-05
YER070W	rnr1Y285F	YKR055W	RHO4	1.00838	0.022	1.07616	0.014	-0.06638	0.022	0
YER070W	rnr1Y285F	YNL144C	YNL144C	0.95667	0.096	1.0247	0.01	-0.06623	0.096	0.00028
YER070W	rnr1Y285F	YGR268C	HUA1	0.96999	0.17	1.02819	0.116	-0.06593	0.17	0.00144
YER070W	rnr1Y285F	YNL140C	YNL140C	1.05047	0.029	1.11764	0.026	-0.06588	0.029	1e-05
YER070W	rnr1Y285F	YPL119C	DBP1	0.98165	0.008	1.04614	0.016	-0.06575	0.008	2e-05
YER070W	rnr1Y285F	YGL105W	ARC1	0.06352	0.035	0.12817	0.002	-0.06529	0.035	0.03542
YER070W	rnr1Y285F	YOR223W	YOR223W	0.92483	0.027	0.98988	0.016	-0.0651	0.027	1e-05
YER070W	rnr1Y285F	YOR001W	RRP6	0.71991	0.009	0.78251	0.022	-0.06487	0.009	5e-05
YER070W	rnr1Y285F	YNL051W	COG5	0.891	0.046	0.95622	0.022	-0.06482	0.046	4e-05
YER070W	rnr1Y285F	YOR275C	RIM20	0.69866	0.037	0.77061	0.031	-0.0646	0.037	4e-05
YER070W	rnr1Y285F	YLR099C	ICT1	0.98897	0.012	1.04675	0.027	-0.06454	0.012	0
YER070W	rnr1Y285F	YLR193C	UPS1	0.80569	0.063	0.84541	0.078	-0.06419	0.063	0.00013
YER070W	rnr1Y285F	YDR015C	YDR015C	1.02007	0.002	1.08612	0.004	-0.06412	0.002	0
YER070W	rnr1Y285F	YLL026W	HSP104	0.98581	0.001	1.05192	0.047	-0.06375	0.001	0
YER070W	rnr1Y285F	YDR093W	DNF2	0.94022	0.079	1.00188	0.015	-0.06324	0.079	0.00016
YER070W	rnr1Y285F	YPL216W	YPL216W	0.96658	0.074	1.02937	0.017	-0.06309	0.074	0.00012
YER070W	rnr1Y285F	YMR172C-A	YMR172C-A	1.01367	0.013	1.07588	0.017	-0.06296	0.013	0
YER070W	rnr1Y285F	YOR085W	OST3	0.84336	0.028	0.89938	0.012	-0.06266	0.028	1e-05
YER070W	rnr1Y285F	YGR079W	YGR079W	0.94883	0.001	1.01153	0.027	-0.06262	0.001	0
YER070W	rnr1Y285F	YLL038C	ENT4	0.95576	0.007	1.02271	0.019	-0.06241	0.007	2e-05
YER070W	rnr1Y285F	YPL223C	GRE1	0.9963	0.027	1.06018	0.002	-0.06228	0.027	1e-05
YER070W	rnr1Y285F	YMR258C	ROY1	0.94556	0.059	1.00782	0.004	-0.06217	0.059	7e-05
YER070W	rnr1Y285F	YLL012W	YEH1	1.0127	0.007	1.07514	0.001	-0.0621	0.007	2e-05
YER070W	rnr1Y285F	YOR276W	CAF20	0.98712	0.042	1.0475	0.015	-0.06176	0.042	2e-05
YER070W	rnr1Y285F	YDR536W	STL1	1.01597	0.026	1.07031	0.021	-0.06176	0.026	0
YER070W	rnr1Y285F	YGL101W	YGL101W	0.91579	0.065	0.96885	0.016	-0.06166	0.065	0.0001
YER070W	rnr1Y285F	YOR246C	ENV9	1.02329	0.007	1.08517	0.011	-0.06161	0.007	0
YER070W	rnr1Y285F	YDR284C	DPP1	0.95624	0.008	1.01973	0.024	-0.06134	0.008	2e-05
YER070W	rnr1Y285F	YLR097C	HRT3	0.98976	0.012	1.0544	0.016	-0.06119	0.012	0
YER070W	rnr1Y285F	YJR129C	YJR129C	0.98075	0.008	1.04381	0.031	-0.06115	0.008	2e-05
YER070W	rnr1Y285F	YDR067C	OCA6	1.01982	0.105	1.07586	0.02	-0.06114	0.105	0.0003
YER070W	rnr1Y285F	YKL066W	YKL066W	0.82788	0.032	0.88851	0.004	-0.06065	0.032	2e-05
YER070W	rnr1Y285F	YLL056C	YLL056C	1.00388	0.022	1.06606	0.005	-0.0605	0.022	0
YER070W	rnr1Y285F	YOR383C	FIT3	0.98078	0.053	1.03917	0.016	-0.06036	0.053	4e-05
YER070W	rnr1Y285F	YKL179C	COY1	1.04179	0.022	1.09787	0.01	-0.0603	0.022	0
YER070W	rnr1Y285F	YIL165C	YIL165C	1.05369	0.047	1.11251	0.004	-0.06023	0.047	0.00066
YER070W	rnr1Y285F	YJR030C	YJR030C	0.95968	0.031	1.0178	0.005	-0.06021	0.031	1e-05
YER070W	rnr1Y285F	YJR103W	URA8	0.90177	0.044	0.96218	0.014	-0.06017	0.044	3e-05
YER070W	rnr1Y285F	YDR163W	CWC15	1.00139	0.031	1.06128	0.009	-0.06009	0.031	1e-05
YER070W	rnr1Y285F	YHR097C	YHR097C	0.983	0.009	1.03813	0.016	-0.05988	0.009	0
YER070W	rnr1Y285F	YPL172C	COX10	0.84984	0.021	0.90971	0.013	-0.05978	0.021	0
YER070W	rnr1Y285F	YKL150W	MCR1	0.91585	0.009	0.9691	0.069	-0.05974	0.009	3e-05
YER070W	rnr1Y285F	YBL039C	URA7	0.91471	0.029	0.97596	0.026	-0.0597	0.029	1e-05
YER070W	rnr1Y285F	YAR031W	PRM9	0.916	0.118	0.97337	0.085	-0.05958	0.118	0.00058
YER070W	rnr1Y285F	YCR053W	THR4	0.52941	0.087	0.59317	0.039	-0.05896	0.087	0.00118
YER070W	rnr1Y285F	YKL200C	YKL200C	1.06668	0.001	1.12283	0.031	-0.05884	0.001	0
YER070W	rnr1Y285F	YMR063W	RIM9	0.78732	0.062	0.85032	0.033	-0.05877	0.062	0.00013
YER070W	rnr1Y285F	YPR011C	YPR011C	1.02838	0.045	1.09028	0.02	-0.0584	0.045	2e-05
YER070W	rnr1Y285F	YOR251C	TUM1	0.99915	0.016	1.058	0.01	-0.05808	0.016	0
YER070W	rnr1Y285F	YOR269W	PAC1	0.92134	0.008	0.97717	0.012	-0.05791	0.008	3e-05
YER070W	rnr1Y285F	YER183C	FAU1	0.99649	0.003	1.05368	0.02	-0.05754	0.003	0
YER070W	rnr1Y285F	YIL164C	NIT1	1.02699	0.003	1.0841	0.013	-0.05699	0.003	0
YER070W	rnr1Y285F	YOL085C	YOL085C	1.00096	0.021	1.05106	0.026	-0.05699	0.021	0.00014
YER070W	rnr1Y285F	YOR047C	STD1	0.9779	0.029	1.02725	0.029	-0.05667	0.029	1e-05
YER070W	rnr1Y285F	YMR253C	YMR253C	0.98234	0.008	1.04002	0.012	-0.05651	0.008	0
YER070W	rnr1Y285F	YLL005C	SPO75	0.98975	0.04	1.04099	0.026	-0.05643	0.04	2e-05
YER070W	rnr1Y285F	YLR452C	SST2	0.95161	0.029	1.00241	0.04	-0.05621	0.029	1e-05
YER070W	rnr1Y285F	YJL193W	YJL193W	0.95837	0.039	1.01459	0.008	-0.05614	0.039	2e-05
YER070W	rnr1Y285F	YFR040W	SAP155	0.77341	0.009	0.82977	0.009	-0.05558	0.009	0
YER070W	rnr1Y285F	YNL066W	SUN4	1.02709	0.083	1.0787	0.042	-0.05554	0.083	0.00015
YER070W	rnr1Y285F	YDR117C	TMA64	1.03271	0.021	1.08877	0.007	-0.05553	0.021	0
YER070W	rnr1Y285F	YKL160W	ELF1	0.95031	0.03	0.99852	0.035	-0.05551	0.03	1e-05
YER070W	rnr1Y285F	YMR110C	HFD1	1.016	0.012	1.07768	0.042	-0.05529	0.012	0
YER070W	rnr1Y285F	YDR494W	RSM28	0.9992	0.031	1.05464	0.014	-0.05507	0.031	1e-05
YER070W	rnr1Y285F	YDR388W	RVS167	0.53792	0.011	0.59052	0.017	-0.05493	0.011	0.00013
YER070W	rnr1Y285F	YMR158C-A	YMR158C-A	1.04589	0.023	1.10012	0.009	-0.05489	0.023	0
YER070W	rnr1Y285F	YFR035C	YFR035C	0.97797	0.028	1.03311	0.018	-0.05476	0.028	1e-05
YER070W	rnr1Y285F	YKL128C	PMU1	0.94611	0.032	1.00472	0.027	-0.05389	0.032	1e-05
YER070W	rnr1Y285F	YHL039W	EFM1	1.02934	0.001	1.08359	0.009	-0.05354	0.001	0
YER070W	rnr1Y285F	YDL191W	RPL35A	0.83165	0.013	0.88811	0.028	-0.05309	0.013	8e-05
YER070W	rnr1Y285F	YLR171W	YLR171W	0.99328	0.019	1.04665	0.019	-0.05308	0.019	0
YER070W	rnr1Y285F	YLR345W	YLR345W	1.07133	0.013	1.12823	0.037	-0.05287	0.013	0
YER070W	rnr1Y285F	YLR251W	SYM1	1.05128	0.008	1.09743	0.025	-0.05255	0.008	0
YER070W	rnr1Y285F	YPL195W	APL5	0.9199	0.08	0.97192	0.009	-0.05254	0.08	0.00018
YER070W	rnr1Y285F	YJR153W	PGU1	0.91613	0.012	0.97678	0.029	-0.05245	0.012	6e-05
YER070W	rnr1Y285F	YKL020C	SPT23	0.91273	0.019	0.96975	0.023	-0.05242	0.019	0
YER070W	rnr1Y285F	YPR024W	YME1	0.62482	0.017	0.68017	0.015	-0.05225	0.017	1e-05
YER070W	rnr1Y285F	YDR254W	CHL4	0.99876	0.02	1.05004	0.004	-0.05223	0.02	0
YER070W	rnr1Y285F	YOL004W	SIN3	0.49973	0.086	0.54461	0.068	-0.05212	0.086	0.00137
YER070W	rnr1Y285F	YDL161W	ENT1	0.96481	0.097	1.02046	0.068	-0.05211	0.097	0.00028
YER070W	rnr1Y285F	YFL013W-A	YFL013W-A	0.74029	0.035	0.78566	0.027	-0.05208	0.035	3e-05
YER070W	rnr1Y285F	YMR167W	MLH1	0.87747	0.01	0.92674	0.004	-0.05189	0.01	0
YER070W	rnr1Y285F	YOL002C	IZH2	1.0032	0.023	1.05139	0.013	-0.05184	0.023	0
YER070W	rnr1Y285F	YKL091C	YKL091C	1.01362	0.009	1.0665	0.006	-0.05173	0.009	0
YER070W	rnr1Y285F	YBL072C	RPS8A	0.43364	0.089	0.47674	0.052	-0.05152	0.089	0.00227
YER070W	rnr1Y285F	YLR246W	ERF2	1.04842	0.027	1.09119	0.017	-0.05149	0.027	0
YER070W	rnr1Y285F	YMR221C	YMR221C	0.91027	0.013	0.96381	0.014	-0.05141	0.013	7e-05
YER070W	rnr1Y285F	YDR131C	YDR131C	0.9075	0.046	0.95843	0.047	-0.05139	0.046	4e-05
YER070W	rnr1Y285F	YCR020C-A	MAK31	0.97929	0.062	1.03609	0.027	-0.05138	0.062	7e-05
YER070W	rnr1Y285F	YOR015W	YOR015W	0.98785	0.032	1.03938	0.027	-0.05111	0.032	1e-05
YER070W	rnr1Y285F	YDL234C	GYP7	1.01739	0.016	1.07106	0.007	-0.05109	0.016	0
YER070W	rnr1Y285F	YGL160W	AIM14	0.88641	0.056	0.93103	0.036	-0.05103	0.056	7e-05
YER070W	rnr1Y285F	YLR394W	CST9	0.68848	0.043	0.75147	0.174	-0.05101	0.043	0.0013
YER070W	rnr1Y285F	YDR193W	YDR193W	0.9445	0.002	0.99752	0.025	-0.05086	0.002	0
YER070W	rnr1Y285F	YPL062W	YPL062W	0.98511	0.032	1.03761	0.006	-0.05064	0.032	1e-05
YER070W	rnr1Y285F	YHL031C	GOS1	0.5092	0.028	0.5518	0.022	-0.05047	0.028	4e-05
YER070W	rnr1Y285F	YMR022W	UBC7	0.99444	0.017	1.04299	0.026	-0.05045	0.017	0
YER070W	rnr1Y285F	YPR057W	BRR1	0.91345	0.075	0.96405	0.02	-0.05035	0.075	0.00015
YER070W	rnr1Y285F	YFR048W	RMD8	0.6997	0.03	0.73818	0.021	-0.05	0.03	0.0006
YER070W	rnr1Y285F	YPL249C	GYP5	1.01149	0.017	1.06095	0.025	-0.04993	0.017	0
YER070W	rnr1Y285F	YDL142C	CRD1	0.92759	0.016	0.97741	0.026	-0.04964	0.016	0
YER070W	rnr1Y285F	YDR233C	RTN1	0.89488	0.035	0.94311	0.065	-0.04956	0.035	0.0005
YER070W	rnr1Y285F	YKR078W	YKR078W	1.03035	0.008	1.07304	0.046	-0.04955	0.008	2e-05
YER070W	rnr1Y285F	YHL034C	SBP1	0.82101	0.004	0.86477	0.011	-0.04953	0.004	1e-05
YER070W	rnr1Y285F	YGR121C	MEP1	0.96909	0.035	1.01882	0.02	-0.04942	0.035	1e-05
YER070W	rnr1Y285F	YPR084W	YPR084W	0.89878	0.195	0.95182	0.03	-0.04916	0.195	0.00269
YER070W	rnr1Y285F	YOR357C	SNX3	0.95705	0.002	0.99936	0.025	-0.04913	0.002	0
YER070W	rnr1Y285F	YHR167W	THP2	0.95448	0.005	1.01376	0.049	-0.0491	0.005	1e-05
YER070W	rnr1Y285F	YKL046C	DCW1	0.96281	0.005	1.01499	0.017	-0.04904	0.005	1e-05
YER070W	rnr1Y285F	YDL216C	RRI1	0.96283	0.011	1.00985	0.026	-0.04893	0.011	0
YER070W	rnr1Y285F	YFR032C-A	RPL29	0.82681	0.016	0.87494	0.021	-0.04819	0.016	0
YER070W	rnr1Y285F	YOL053W	AIM39	0.9883	0.005	1.03195	0.017	-0.048	0.005	1e-05
YER070W	rnr1Y285F	YBR147W	RTC2	1.03827	0.037	1.08505	0.001	-0.04778	0.037	1e-05
YER070W	rnr1Y285F	YGR263C	SAY1	1.02131	0.012	1.06735	0.021	-0.04772	0.012	0
YER070W	rnr1Y285F	YDR492W	IZH1	1.01754	0.044	1.06586	0.005	-0.04765	0.044	2e-05
YER070W	rnr1Y285F	YJR119C	JHD2	1.03746	0.01	1.08509	0.017	-0.04747	0.01	0
YER070W	rnr1Y285F	YGR256W	GND2	1.02527	0.002	1.07356	0.008	-0.04746	0.002	0
YER070W	rnr1Y285F	YOR038C	HIR2	0.98281	0.062	1.02841	0.007	-0.04708	0.062	7e-05
YER070W	rnr1Y285F	YJR061W	YJR061W	0.97591	0.053	1.01724	0.024	-0.04699	0.053	5e-05
YER070W	rnr1Y285F	YHR184W	SSP1	1.02454	0.004	1.06546	0.029	-0.04694	0.004	1e-05
YER070W	rnr1Y285F	YOL027C	MDM38	0.99584	0.016	1.03978	0.013	-0.04693	0.016	0
YER070W	rnr1Y285F	YOL092W	YPQ1	1.03127	0.031	1.07827	0.016	-0.04682	0.031	1e-05
YER070W	rnr1Y285F	YGR217W	CCH1	0.94623	0.008	0.99343	0.026	-0.04676	0.008	0
YER070W	rnr1Y285F	YPL116W	HOS3	0.91954	0.039	0.96697	0.002	-0.04658	0.039	2e-05
YER070W	rnr1Y285F	YOR175C	ALE1	0.95937	0.04	1.00275	0.004	-0.04656	0.04	2e-05
YER070W	rnr1Y285F	YKL130C	SHE2	1.02666	0.012	1.06578	0.04	-0.04641	0.012	0
YER070W	rnr1Y285F	YHR132W-A	IGO2	1.02039	0.014	1.06289	0.014	-0.04637	0.014	0
YER070W	rnr1Y285F	YDR513W	GRX2	0.97768	0.065	1.01037	0.045	-0.0463	0.065	8e-05
YER070W	rnr1Y285F	YCR005C	CIT2	0.97523	0.008	1.02579	0.018	-0.04615	0.008	0
YER070W	rnr1Y285F	YLR006C	SSK1	0.9613	0.013	0.99467	0.093	-0.04603	0.013	0
YER070W	rnr1Y285F	YOL053C-A	YOL053C-A	0.99304	0.004	1.04923	0.024	-0.04598	0.004	0
YER070W	rnr1Y285F	YCL039W	GID7	0.95769	0.027	0.99861	0.022	-0.04596	0.027	1e-05
YER070W	rnr1Y285F	YPR118W	MRI1	0.95844	0.047	1.00497	0.018	-0.04586	0.047	3e-05
YER070W	rnr1Y285F	YDR502C	SAM2	0.94323	0.035	0.98717	0.007	-0.04571	0.035	1e-05
YER070W	rnr1Y285F	YJL098W	SAP185	1.03917	0.003	1.07808	0.029	-0.04559	0.003	0
YER070W	rnr1Y285F	YDR420W	HKR1	0.98198	0.022	1.03624	0.016	-0.04557	0.022	0
YER070W	rnr1Y285F	YML070W	DAK1	0.77218	0.12	0.81968	0.05	-0.04557	0.12	0.00101
YER070W	rnr1Y285F	YDL219W	DTD1	0.91846	0.032	0.9678	0.029	-0.04556	0.032	1e-05
YER070W	rnr1Y285F	YNL009W	IDP3	1.08371	0.019	1.13429	0.026	-0.04555	0.019	0
YER070W	rnr1Y285F	YLR294C	YLR294C	0.98009	0.012	1.02473	0.006	-0.04525	0.012	0
YER070W	rnr1Y285F	YDR467C	YDR467C	1.05294	0.005	1.0963	0.004	-0.04516	0.005	1e-05
YER070W	rnr1Y285F	YLR063W	YLR063W	1.02729	0.005	1.07019	0.045	-0.04516	0.005	1e-05
YER070W	rnr1Y285F	YMR106C	YKU80	0.99559	0.041	1.03727	0.034	-0.04505	0.041	2e-05
YER070W	rnr1Y285F	YOL150C	YOL150C	1.08701	0.041	1.13559	0.019	-0.04493	0.041	1e-05
YER070W	rnr1Y285F	YBL069W	AST1	0.97179	0.035	1.01714	0.008	-0.04483	0.035	1e-05
YER070W	rnr1Y285F	YOL155C	HPF1	0.92984	0.08	0.95889	0.068	-0.04472	0.08	0.00017
YER070W	rnr1Y285F	YLR239C	LIP2	0.95883	0.008	1.00425	0.001	-0.04437	0.008	0
YER070W	rnr1Y285F	YLR412W	BER1	0.99705	0.019	1.04063	0.007	-0.04421	0.019	0
YER070W	rnr1Y285F	YDR332W	IRC3	0.94702	0.036	0.99179	0.018	-0.04405	0.035	1e-05
YER070W	rnr1Y285F	YGR261C	APL6	1.03253	0.002	1.07842	0.013	-0.04398	0.002	0
YER070W	rnr1Y285F	YDR425W	SNX41	0.86172	0.032	0.90255	0.012	-0.04385	0.032	1e-05
YER070W	rnr1Y285F	YJR126C	VPS70	0.95837	0.022	1.00463	0.071	-0.04372	0.022	0
YER070W	rnr1Y285F	YLR183C	TOS4	0.99857	0.006	1.04171	0.025	-0.0436	0.006	1e-05
YER070W	rnr1Y285F	YKL040C	NFU1	0.96631	0.012	1.00416	0.019	-0.04344	0.012	0
YER070W	rnr1Y285F	YOR043W	WHI2	0.9108	0.009	0.94357	0.047	-0.0434	0.009	3e-05
YER070W	rnr1Y285F	YMR219W	ESC1	0.97288	0.1	1.01733	0.016	-0.04337	0.1	0.0003
YER070W	rnr1Y285F	YHL042W	YHL042W	1.02211	0.011	1.05614	0.037	-0.04334	0.01	0
YER070W	rnr1Y285F	YGR177C	ATF2	1.06323	0.016	1.10839	0.022	-0.04309	0.016	0
YER070W	rnr1Y285F	YDR453C	TSA2	1.01714	0.033	1.06205	0.01	-0.04297	0.033	1e-05
YER070W	rnr1Y285F	YLR393W	ATP10	0.90763	0.021	0.94664	0.009	-0.04292	0.021	0
YER070W	rnr1Y285F	YPR201W	ARR3	0.94844	0.054	0.9925	0.001	-0.04274	0.053	5e-05
YER070W	rnr1Y285F	YLL063C	AYT1	1.08367	0.005	1.12682	0.006	-0.04272	0.005	1e-05
YER070W	rnr1Y285F	YOR099W	KTR1	0.98117	0.047	1.01051	0.049	-0.04258	0.047	3e-05
YER070W	rnr1Y285F	YAL020C	ATS1	0.91861	0.013	0.95664	0.025	-0.04251	0.013	0
YER070W	rnr1Y285F	YJR083C	ACF4	0.99706	0.017	1.03581	0.03	-0.04239	0.017	0
YER070W	rnr1Y285F	YKR070W	YKR070W	1.03294	0.026	1.0803	0.027	-0.04232	0.026	0
YER070W	rnr1Y285F	YBR050C	REG2	0.96098	0.033	0.99316	0.017	-0.04225	0.033	1e-05
YER070W	rnr1Y285F	YOR237W	HES1	1.00792	0.006	1.04836	0.005	-0.04222	0.006	1e-05
YER070W	rnr1Y285F	YGR260W	TNA1	0.93873	0.022	0.98209	0.013	-0.04194	0.022	0
YER070W	rnr1Y285F	YDR385W	EFT2	0.79013	0.078	0.82981	0.048	-0.04187	0.078	0.00027
YER070W	rnr1Y285F	YPL177C	CUP9	0.93829	0.011	0.97782	0.009	-0.04187	0.011	0
YER070W	rnr1Y285F	YOR034C	AKR2	1.03276	0.011	1.07209	0.007	-0.04174	0.011	0
YER070W	rnr1Y285F	YMR048W	CSM3	0.95869	0.009	1.0041	0.025	-0.0417	0.009	3e-05
YER070W	rnr1Y285F	YKL163W	PIR3	1.03046	0.05	1.07229	0.011	-0.04167	0.05	3e-05
YER070W	rnr1Y285F	YDR479C	PEX29	1.00163	0.048	1.04389	0.013	-0.04165	0.048	3e-05
YER070W	rnr1Y285F	YLL042C	ATG10	0.96632	0.031	1.01018	0.006	-0.04163	0.031	1e-05
YER070W	rnr1Y285F	YPL229W	YPL229W	0.99155	0.005	1.02087	0.041	-0.04155	0.005	1e-05
YER070W	rnr1Y285F	YGR100W	MDR1	0.94861	0.015	0.98386	0.02	-0.04148	0.015	0
YER070W	rnr1Y285F	YOR184W	SER1	0.90984	0.013	0.9489	0.012	-0.04124	0.013	0
YER070W	rnr1Y285F	YMR015C	ERG5	0.97267	0.065	1.01394	0.011	-0.04104	0.065	8e-05
YER070W	rnr1Y285F	YIL034C	CAP2	0.96082	0.013	1.00271	0.017	-0.041	0.013	0
YER070W	rnr1Y285F	YIL053W	RHR2	0.97294	0.014	1.01682	0.023	-0.04092	0.014	7e-05
YER070W	rnr1Y285F	YKR076W	ECM4	1.08418	0.011	1.13167	0.044	-0.04086	0.011	3e-05
YER070W	rnr1Y285F	YOR018W	ROD1	0.76893	0.018	0.81238	0.03	-0.04084	0.018	0
YER070W	rnr1Y285F	YOL042W	NGL1	1.01236	0.032	1.05326	0.008	-0.04081	0.032	1e-05
YER070W	rnr1Y285F	YDR380W	ARO10	1.02687	0.027	1.06759	0.001	-0.04078	0.027	1e-05
YER070W	rnr1Y285F	YHR086W	NAM8	1.05305	0.028	1.09495	0.004	-0.04072	0.028	1e-05
YER070W	rnr1Y285F	YNR007C	ATG3	1.02345	0.006	1.06726	0.015	-0.04064	0.006	1e-05
YER070W	rnr1Y285F	YJL169W	YJL169W	0.93693	0.015	0.97965	0.007	-0.04061	0.015	0
YER070W	rnr1Y285F	YNR059W	MNT4	0.92787	0.048	0.97564	0.029	-0.04058	0.048	4e-05
YER070W	rnr1Y285F	YKL061W	BLI1	0.95461	0.029	0.9979	0.005	-0.04046	0.029	1e-05
YER070W	rnr1Y285F	YGL080W	FMP37	0.9553	0.042	0.99567	0.011	-0.04046	0.042	2e-05
YER070W	rnr1Y285F	YCR033W	SNT1	0.98734	0.014	1.02845	0.02	-0.04011	0.014	0
YER070W	rnr1Y285F	YDR123C	INO2	0.42005	0.027	0.4601	0.006	-0.04008	0.027	8e-05
YER070W	rnr1Y285F	YLR035C	MLH2	1.01489	0.077	1.05678	0.015	-0.03988	0.077	0.00012
YER070W	rnr1Y285F	YLR020C	YEH2	1.01529	0.015	1.05885	0.014	-0.03977	0.015	0
YER070W	rnr1Y285F	YLR059C	REX2	0.89276	0.083	0.93707	0.03	-0.03972	0.083	0.00022
YER070W	rnr1Y285F	YKR017C	HEL1	1.02429	0.015	1.06265	0.003	-0.03968	0.015	0
YER070W	rnr1Y285F	YMR027W	YMR027W	1.09713	0.037	1.14021	0.048	-0.03957	0.037	1e-05
YER070W	rnr1Y285F	YDR239C	YDR239C	1.00847	0.007	1.04901	0.053	-0.03954	0.007	0
YER070W	rnr1Y285F	YOL129W	VPS68	0.94173	0.009	0.98092	0.003	-0.03941	0.009	3e-05
YER070W	rnr1Y285F	YOR115C	TRS33	0.94547	0.037	0.97486	0.04	-0.03939	0.037	2e-05
YER070W	rnr1Y285F	YDR279W	RNH202	0.96493	0.03	1.00189	0.028	-0.03919	0.03	1e-05
YER070W	rnr1Y285F	YMR259C	TRM732	0.99878	0.033	1.03997	0.014	-0.03914	0.033	1e-05
YER070W	rnr1Y285F	YPR106W	ISR1	1.00523	0.035	1.04803	0.035	-0.03908	0.035	1e-05
YER070W	rnr1Y285F	YLR431C	ATG23	1.00352	0.02	1.0464	0.008	-0.03902	0.02	0
YER070W	rnr1Y285F	YOR010C	TIR2	0.95206	0.002	0.98984	0.002	-0.039	0.002	0
YER070W	rnr1Y285F	YLR319C	BUD6	0.96081	0.01	1.00162	0.015	-0.03897	0.01	0
YER070W	rnr1Y285F	YKL017C	HCS1	1.06172	0.009	1.10156	0.012	-0.03884	0.009	0
YER070W	rnr1Y285F	YBR030W	RKM3	0.92969	0.035	0.95844	0.039	-0.03883	0.035	1e-05
YER070W	rnr1Y285F	YLR273C	PIG1	0.95267	0.04	1.0009	0.033	-0.03883	0.04	2e-05
YER070W	rnr1Y285F	YOL062C	APM4	0.99849	0.006	1.03225	0.03	-0.03879	0.006	1e-05
YER070W	rnr1Y285F	YGR207C	CIR1	1.04266	0.024	1.08112	0.001	-0.03871	0.024	0
YER070W	rnr1Y285F	YJR139C	HOM6	0.79327	0.004	0.83195	0.012	-0.03868	0.004	1e-05
YER070W	rnr1Y285F	YPL111W	CAR1	1.02126	0.018	1.05931	0.014	-0.03867	0.018	0
YER070W	rnr1Y285F	YIL105C	SLM1	1.02204	0.05	1.06245	0.003	-0.03859	0.05	3e-05
YER070W	rnr1Y285F	YCR017C	CWH43	1.02165	0.023	1.06252	0.009	-0.03852	0.023	0
YER070W	rnr1Y285F	YOL030W	GAS5	0.97431	0.008	1.00839	0.012	-0.03842	0.008	0
YER070W	rnr1Y285F	YLR455W	YLR455W	0.94984	0.005	0.98847	0.03	-0.03841	0.005	1e-05
YER070W	rnr1Y285F	YNL122C	YNL122C	0.86781	0.118	0.91664	0.093	-0.0384	0.118	0.00068
YER070W	rnr1Y285F	YLR262C-A	TMA7	1.05677	0.025	1.0922	0.048	-0.03834	0.025	0
YER070W	rnr1Y285F	YGR132C	PHB1	1.02828	0.012	1.06945	0.019	-0.03831	0.012	0
YER070W	rnr1Y285F	YMR017W	SPO20	1.01402	0.082	1.05038	0.03	-0.03828	0.082	0.00014
YER070W	rnr1Y285F	YKL221W	MCH2	1.01258	0.017	1.04257	0.023	-0.03818	0.017	0
YER070W	rnr1Y285F	YHR032W	ERC1	1.06623	0.003	1.09668	0.038	-0.03812	0.003	0
YER070W	rnr1Y285F	YKL047W	ANR2	0.98804	0.007	1.0269	0.014	-0.03806	0.007	0
YER070W	rnr1Y285F	YFL048C	EMP47	1.00198	0.024	1.04098	0.026	-0.03802	0.024	0
YER070W	rnr1Y285F	YGL227W	VID30	0.9794	0.031	1.0185	0.003	-0.03795	0.031	1e-05
YER070W	rnr1Y285F	YNR071C	YNR071C	0.59954	0.188	0.63734	0.011	-0.03795	0.188	0.00785
YER070W	rnr1Y285F	YJL068C	YJL068C	1.01664	0.012	1.05145	0.017	-0.03787	0.012	0
YER070W	rnr1Y285F	YKR029C	SET3	0.96646	0.015	1.0017	0.009	-0.03781	0.015	0
YER070W	rnr1Y285F	YDR406W	PDR15	1.00953	0.013	1.0464	0.02	-0.03777	0.013	0
YER070W	rnr1Y285F	YMR124W	YMR124W	1.04423	0.066	1.07387	0.046	-0.03762	0.066	7e-05
YER070W	rnr1Y285F	YJL017W	YJL017W	1.04505	0.016	1.08004	0.02	-0.03761	0.016	0
YER070W	rnr1Y285F	YHR003C	YHR003C	0.99668	0.036	1.03176	0.009	-0.03744	0.036	1e-05
YER070W	rnr1Y285F	YDR218C	SPR28	0.97526	0.055	1.01168	0.015	-0.03742	0.055	5e-05
YER070W	rnr1Y285F	YER185W	PUG1	0.97305	0.02	1.00941	0.006	-0.03742	0.02	0.00014
YER070W	rnr1Y285F	YPL003W	ULA1	0.95216	0.041	0.99092	0.009	-0.03734	0.041	2e-05
YER070W	rnr1Y285F	YCR006C	YCR006C	1.05087	0.012	1.08802	0.011	-0.03734	0.012	0
YER070W	rnr1Y285F	YJL079C	PRY1	1.01775	0.059	1.05755	0.005	-0.03725	0.059	5e-05
YER070W	rnr1Y285F	YMR307W	GAS1	1.00852	0.02	1.043	0.021	-0.03722	0.02	0
YER070W	rnr1Y285F	YLR281C	YLR281C	1.01893	0.008	1.06235	0.027	-0.03722	0.008	2e-05
YER070W	rnr1Y285F	YKL140W	TGL1	0.96196	0.011	0.99979	0.012	-0.03721	0.011	4e-05
YER070W	rnr1Y285F	YPL240C	HSP82	0.91978	0.031	0.95709	0.015	-0.03718	0.031	1e-05
YER070W	rnr1Y285F	YKL116C	PRR1	1.00557	0.027	1.04469	0.01	-0.03712	0.027	1e-05
YER070W	rnr1Y285F	YGR144W	THI4	0.95859	0.03	0.99914	0.013	-0.0371	0.03	1e-05
YER070W	rnr1Y285F	YAL042W	ERV46	0.9673	0.003	0.99811	0.023	-0.03704	0.003	0
YER070W	rnr1Y285F	YGR244C	LSC2	1.10531	0.035	1.14489	0.008	-0.03701	0.035	1e-05
YER070W	rnr1Y285F	YOR055W	YOR055W	0.99149	0.025	1.03114	0.016	-0.03688	0.025	0
YER070W	rnr1Y285F	YJR009C	TDH2	1.06834	0.034	1.09674	0.035	-0.03681	0.034	1e-05
YER070W	rnr1Y285F	YHR195W	NVJ1	1.0587	0.006	1.09847	0.009	-0.03681	0.006	1e-05
YER070W	rnr1Y285F	YCR101C	YCR101C	1.00227	0.033	1.03818	0.021	-0.03675	0.033	1e-05
YER070W	rnr1Y285F	YML099C	ARG81	1.04699	0.034	1.0798	0.011	-0.0367	0.034	1e-05
YER070W	rnr1Y285F	YOR296W	YOR296W	0.97918	0.03	1.01851	0.013	-0.03654	0.03	1e-05
YER070W	rnr1Y285F	YLR368W	MDM30	0.9974	0.021	1.03816	0.014	-0.03651	0.021	0
YER070W	rnr1Y285F	YHR109W	CTM1	1.028	0.003	1.06384	0.01	-0.03647	0.003	0
YER070W	rnr1Y285F	YDR257C	RKM4	0.98157	0.012	1.01935	0.008	-0.03638	0.012	0
YER070W	rnr1Y285F	YHR163W	SOL3	0.98109	0.007	1.01668	0.009	-0.03635	0.007	2e-05
YER070W	rnr1Y285F	YOL008W	COQ10	0.94257	0.025	0.97609	0.021	-0.03633	0.025	1e-05
YER070W	rnr1Y285F	YLR073C	RFU1	1.02	0.009	1.04718	0.032	-0.03627	0.009	0
YER070W	rnr1Y285F	YLR185W	RPL37A	0.64339	0.082	0.68018	0.003	-0.03624	0.082	0.00057
YER070W	rnr1Y285F	YCL046W	YCL046W	1.00722	0.01	1.04395	0.001	-0.03623	0.01	0
YER070W	rnr1Y285F	YLR344W	RPL26A	0.9824	0.02	1.0055	0.059	-0.03621	0.02	0
YER070W	rnr1Y285F	YPL194W	DDC1	1.01564	0.019	1.05196	0.03	-0.0362	0.019	0
YER070W	rnr1Y285F	YMR302C	YME2	1.03539	0.026	1.0592	0.039	-0.0362	0.026	0
YER070W	rnr1Y285F	YPL196W	OXR1	0.9501	0.021	0.98587	0.002	-0.03618	0.021	0.00017
YER070W	rnr1Y285F	YGL141W	HUL5	0.99067	0.026	1.03128	0.018	-0.03618	0.026	0
YER070W	rnr1Y285F	YMR075W	RCO1	0.92732	0.026	0.95515	0.035	-0.03605	0.026	1e-05
YER070W	rnr1Y285F	YDR281C	PHM6	0.99277	0.007	1.02885	0.018	-0.03595	0.007	2e-05
YER070W	rnr1Y285F	YDR085C	AFR1	1.01352	0.021	1.05123	0.002	-0.0359	0.021	0
YER070W	rnr1Y285F	YOR028C	CIN5	0.97381	0.01	1.01242	0.013	-0.03579	0.01	0
YER070W	rnr1Y285F	YCR060W	TAH1	0.97374	0.088	1.00764	0.006	-0.03567	0.088	0.0002
YER070W	rnr1Y285F	YLR312C	YLR312C	0.99921	0.007	1.04154	0.011	-0.03567	0.007	1e-05
YER070W	rnr1Y285F	YGL118C	YGL118C	0.9791	0.007	1.01629	0.008	-0.03554	0.007	0
YER070W	rnr1Y285F	YPR003C	YPR003C	1.0109	0.013	1.04745	0.014	-0.0355	0.013	5e-05
YER070W	rnr1Y285F	YIL071C	PCI8	0.96675	0.015	1.00274	0.02	-0.03548	0.015	0
YER070W	rnr1Y285F	YHR009C	TDA3	1.04596	0.013	1.08379	0.017	-0.03538	0.013	5e-05
YER070W	rnr1Y285F	YOR072W	YOR072W	0.98403	0.006	1.01932	0.002	-0.03535	0.006	0
YER070W	rnr1Y285F	YJR043C	POL32	0.95468	0.017	0.98793	0.009	-0.03533	0.017	0
YER070W	rnr1Y285F	YDR452W	PPN1	1.04353	0.013	1.07411	0.028	-0.03513	0.013	0
YER070W	rnr1Y285F	YJL117W	PHO86	0.93381	0.039	0.96826	0.006	-0.03505	0.039	2e-05
YER070W	rnr1Y285F	YCR086W	CSM1	0.89476	0.037	0.9287	0.009	-0.03492	0.037	2e-05
YER070W	rnr1Y285F	YFR038W	IRC5	1.00058	0.005	1.03203	0.03	-0.03484	0.005	1e-05
YER070W	rnr1Y285F	YLL032C	YLL032C	0.96982	0.018	1.00518	0.01	-0.03482	0.018	0.00012
YER070W	rnr1Y285F	YGL059W	PKP2	0.9336	0.035	0.97134	0.017	-0.03473	0.035	1e-05
YER070W	rnr1Y285F	YHR137W	ARO9	1.04033	0.03	1.07044	0.025	-0.03466	0.029	1e-05
YER070W	rnr1Y285F	YDR333C	YDR333C	1.01632	0.035	1.05004	0.012	-0.0346	0.035	1e-05
YER070W	rnr1Y285F	YDL071C	YDL071C	1.01516	0.023	1.05149	0.013	-0.0346	0.023	0
YER070W	rnr1Y285F	YOR042W	CUE5	0.98664	0.025	1.02316	0.027	-0.03447	0.025	0
YER070W	rnr1Y285F	YDL118W	YDL118W	0.88539	0.017	0.91787	0.015	-0.03445	0.017	0
YER070W	rnr1Y285F	YDR476C	YDR476C	0.93064	0.006	0.95966	0.036	-0.03438	0.006	1e-05
YER070W	rnr1Y285F	YKR030W	GMH1	0.96546	0.004	0.99914	0.023	-0.03417	0.004	1e-05
YER070W	rnr1Y285F	YER173W	RAD24	1.01007	0.003	1.0447	0.007	-0.03416	0.003	0
YER070W	rnr1Y285F	YNL070W	TOM7	0.95002	0.018	0.98338	0.003	-0.0341	0.018	0
YER070W	rnr1Y285F	YJL045W	YJL045W	0.98341	0.036	1.0151	0.008	-0.03406	0.036	1e-05
YER070W	rnr1Y285F	YGR111W	YGR111W	0.9759	0.006	1.01045	0.018	-0.03402	0.006	1e-05
YER070W	rnr1Y285F	YPR134W	MSS18	0.9176	0.01	0.95478	0.013	-0.03394	0.01	0
YER070W	rnr1Y285F	YHR138C	YHR138C	1.00605	0.044	1.04465	0.026	-0.03389	0.044	2e-05
YER070W	rnr1Y285F	YOR100C	CRC1	0.94166	0.013	0.97315	0.012	-0.03368	0.013	0
YER070W	rnr1Y285F	YPL236C	ENV7	0.97702	0.011	1.01016	0.019	-0.03359	0.011	0
YER070W	rnr1Y285F	YLR084C	RAX2	1.02493	0.021	1.06089	0.004	-0.03358	0.021	0
YER070W	rnr1Y285F	YDR251W	PAM1	1.02522	0.015	1.06629	0.027	-0.03355	0.015	0
YER070W	rnr1Y285F	YPL091W	GLR1	1.00104	0.031	1.03543	0.005	-0.03351	0.031	1e-05
YER070W	rnr1Y285F	YJR142W	YJR142W	1.02067	0.003	1.05413	0.003	-0.03345	0.003	0
YER070W	rnr1Y285F	YBR162C	TOS1	1.01758	0.011	1.05236	0.011	-0.03345	0.011	0
YER070W	rnr1Y285F	YJL027C	YJL027C	1.04071	0.003	1.07247	0.009	-0.03342	0.003	0
YER070W	rnr1Y285F	YBL106C	SRO77	0.99402	0.025	1.02732	0.016	-0.03339	0.025	0
YER070W	rnr1Y285F	YBR177C	EHT1	1.02946	0.013	1.0629	0.013	-0.03335	0.013	0
YER070W	rnr1Y285F	YGL244W	RTF1	0.74094	0.032	0.77109	0.017	-0.03318	0.032	2e-05
YER070W	rnr1Y285F	YAL002W	VPS8	0.75652	0.038	0.79235	0.012	-0.03312	0.038	3e-05
YER070W	rnr1Y285F	YPL001W	HAT1	0.96497	0.022	0.99566	0.012	-0.03307	0.022	0
YER070W	rnr1Y285F	YJL182C	YJL182C	0.97117	0.012	1.00553	0.007	-0.03299	0.012	0
YER070W	rnr1Y285F	YOR382W	FIT2	1.01653	0.035	1.04556	0.019	-0.03292	0.035	1e-05
YER070W	rnr1Y285F	YGR010W	NMA2	0.99149	0.028	1.0282	0.017	-0.0329	0.028	1e-05
YER070W	rnr1Y285F	YBR065C	ECM2	0.97993	0.006	1.01189	0.006	-0.03271	0.006	1e-05
YER070W	rnr1Y285F	YJR133W	XPT1	0.99906	0.008	1.03249	0.026	-0.03268	0.008	0
YER070W	rnr1Y285F	YDR036C	EHD3	1.00882	0.025	1.04112	0.013	-0.03268	0.025	0
YER070W	rnr1Y285F	YLR003C	CMS1	0.98223	0.014	1.01599	0.007	-0.03268	0.014	0
YER070W	rnr1Y285F	YIL163C	YIL163C	0.97136	0.02	1.00638	0.011	-0.03262	0.02	0
YER070W	rnr1Y285F	YOR003W	YSP3	1.01816	0.016	1.04576	0.014	-0.03257	0.016	0
YER070W	rnr1Y285F	YJL066C	MPM1	0.9826	0.014	1.01584	0.002	-0.03254	0.014	0
YER070W	rnr1Y285F	YDL135C	RDI1	1.01014	0.034	1.03931	0.007	-0.03249	0.034	1e-05
YER070W	rnr1Y285F	YLL051C	FRE6	0.83806	0.028	0.86729	0.009	-0.03242	0.028	1e-05
YER070W	rnr1Y285F	YHR139C	SPS100	1.02544	0.003	1.05995	0.013	-0.03237	0.003	0
YER070W	rnr1Y285F	YGR235C	MOS2	1.00873	0.018	1.0378	0.042	-0.0323	0.018	0
YER070W	rnr1Y285F	YBR296C	PHO89	0.99035	0.037	1.02759	0.023	-0.03229	0.037	1e-05
YER070W	rnr1Y285F	YGR026W	YGR026W	0.9737	0.049	1.00434	0.02	-0.03229	0.049	4e-05
YER070W	rnr1Y285F	YBR220C	YBR220C	0.99418	0.032	1.02653	0.017	-0.03224	0.032	1e-05
YER070W	rnr1Y285F	YGL146C	RRT6	0.89919	0.036	0.93055	0.014	-0.03221	0.036	2e-05
YER070W	rnr1Y285F	YLR343W	GAS2	0.97643	0.012	1.0078	0.008	-0.03216	0.012	0
YER070W	rnr1Y285F	YAL028W	FRT2	0.99272	0.012	1.02519	0.013	-0.03213	0.012	0
YER070W	rnr1Y285F	YDL122W	UBP1	0.90238	0.125	0.92455	0.053	-0.03212	0.124	0.00071
YER070W	rnr1Y285F	YBR161W	CSH1	1.05806	0.005	1.0912	0.006	-0.0321	0.005	0
YER070W	rnr1Y285F	YML096W	YML096W	1.02053	0.015	1.05177	0.005	-0.03209	0.015	0
YER070W	rnr1Y285F	YOR109W	INP53	0.91002	0.008	0.94166	0.005	-0.03206	0.008	0
YER070W	rnr1Y285F	YPL022W	RAD1	0.94189	0.037	0.9733	0.021	-0.03205	0.037	2e-05
YER070W	rnr1Y285F	YOL124C	TRM11	0.93834	0.017	0.96719	0.005	-0.03194	0.017	0
YER070W	rnr1Y285F	YDL065C	PEX19	0.93641	0.004	0.9688	0.001	-0.03182	0.004	1e-05
YER070W	rnr1Y285F	YHL024W	RIM4	0.99826	0.03	1.03121	0.005	-0.03177	0.03	1e-05
YER070W	rnr1Y285F	YOR137C	SIA1	0.97909	0.038	1.01706	0.042	-0.03169	0.038	2e-05
YER070W	rnr1Y285F	YIL047C	SYG1	1.04195	0.001	1.07472	0.017	-0.03165	0.001	0
YER070W	rnr1Y285F	YBR114W	RAD16	1.00382	0.007	1.02891	0.018	-0.03159	0.007	0
YER070W	rnr1Y285F	YKL159C	RCN1	1.08898	0.025	1.12089	0.003	-0.03154	0.025	0
YER070W	rnr1Y285F	YDR537C	YDR537C	1.00934	0.014	1.0332	0.021	-0.03147	0.014	6e-05
YER070W	rnr1Y285F	YJL070C	YJL070C	1.01254	0.031	1.04138	0.024	-0.03136	0.031	1e-05
YER070W	rnr1Y285F	YPL134C	ODC1	1.04565	0.032	1.0749	0.026	-0.03136	0.032	1e-05
YER070W	rnr1Y285F	YMR138W	CIN4	1.05717	0.054	1.08579	0.03	-0.03133	0.054	4e-05
YER070W	rnr1Y285F	YCR045C	RRT12	1.0076	0.021	1.04334	0.024	-0.03132	0.021	0
YER070W	rnr1Y285F	YAL004W	YAL004W	1.00299	0.028	1.02272	0.031	-0.03132	0.028	1e-05
YER070W	rnr1Y285F	YDL130W	RPP1B	0.89552	0.023	0.92645	0.029	-0.03125	0.023	0
YER070W	rnr1Y285F	YOR374W	ALD4	0.96923	0.009	1.00053	0.011	-0.03124	0.009	3e-05
YER070W	rnr1Y285F	YBR180W	DTR1	0.97506	0.023	1.00572	0.005	-0.03124	0.023	0
YER070W	rnr1Y285F	YMR058W	FET3	1.01382	0.005	1.04455	0.016	-0.03121	0.005	1e-05
YER070W	rnr1Y285F	YMR292W	GOT1	1.01898	0.047	1.042	0.05	-0.03121	0.047	3e-05
YER070W	rnr1Y285F	YIR014W	YIR014W	1.03315	0.017	1.06247	0.023	-0.03119	0.017	0
YER070W	rnr1Y285F	YGR080W	TWF1	0.99326	0.012	1.0251	0.017	-0.03112	0.012	5e-05
YER070W	rnr1Y285F	YNL031C	HHT2	0.98799	0.011	1.02117	0.01	-0.0311	0.011	4e-05
YER070W	rnr1Y285F	YPR098C	YPR098C	0.93879	0.047	0.9711	0.013	-0.03103	0.047	4e-05
YER070W	rnr1Y285F	YPL155C	KIP2	1.0292	0.028	1.06941	0.027	-0.03097	0.028	0.00026
YER070W	rnr1Y285F	YNR034W	SOL1	1.01002	0.021	1.03673	0.018	-0.03095	0.021	0
YER070W	rnr1Y285F	YCR010C	ADY2	1.03235	0.031	1.06017	0.01	-0.03094	0.031	1e-05
YER070W	rnr1Y285F	YGL109W	YGL109W	0.99446	0.016	1.02594	0.026	-0.03088	0.016	0
YER070W	rnr1Y285F	YIL162W	SUC2	0.99175	0.008	1.02437	0.007	-0.03087	0.008	0
YER070W	rnr1Y285F	YML035C	AMD1	1.00042	0.015	1.02569	0.029	-0.03083	0.015	0
YER070W	rnr1Y285F	YKR089C	TGL4	1.00734	0.015	1.03561	0.012	-0.0308	0.015	0
YER070W	rnr1Y285F	YCL027W	FUS1	1.03614	0.02	1.06594	0.003	-0.03079	0.02	0
YER070W	rnr1Y285F	YKL220C	FRE2	0.97749	0.021	1.00511	0.019	-0.0307	0.021	0
YER070W	rnr1Y285F	YBR274W	CHK1	1.0001	0.031	1.02841	0.006	-0.03057	0.031	1e-05
YER070W	rnr1Y285F	YNL086W	SNN1	0.936	0.014	0.96594	0.014	-0.03055	0.014	0
YER070W	rnr1Y285F	YGL243W	TAD1	1.01173	0.003	1.04027	0.008	-0.03054	0.003	0
YER070W	rnr1Y285F	YLR456W	YLR456W	1.00136	0.004	1.03948	0.035	-0.03052	0.004	0
YER070W	rnr1Y285F	YDL170W	UGA3	0.98052	0.021	1.01066	0.002	-0.03051	0.021	0
YER070W	rnr1Y285F	YNL001W	DOM34	0.9556	0.016	0.98573	0.003	-0.03049	0.016	0
YER070W	rnr1Y285F	YNR061C	YNR061C	0.9394	0.06	0.97479	0.022	-0.03048	0.06	7e-05
YER070W	rnr1Y285F	YOR229W	WTM2	1.03295	0.027	1.06097	0.027	-0.03047	0.027	0
YER070W	rnr1Y285F	YJR095W	SFC1	0.96055	0.056	0.99996	0.024	-0.03042	0.056	5e-05
YER070W	rnr1Y285F	YML104C	MDM1	0.99892	0.015	1.02355	0.021	-0.03034	0.015	0
YER070W	rnr1Y285F	YKL098W	MTC2	1.0167	0.018	1.04605	0.003	-0.03021	0.018	0
YER070W	rnr1Y285F	YDR271C	YDR271C	1.00883	0.037	1.03833	0.023	-0.03016	0.037	1e-05
YER070W	rnr1Y285F	YOL059W	GPD2	0.98161	0.016	1.01052	0.003	-0.03013	0.016	0
YER070W	rnr1Y285F	YDL019C	OSH2	1.00259	0.015	1.03352	0.009	-0.03006	0.015	0
YER070W	rnr1Y285F	YDR354W	TRP4	1.02036	0.016	1.04689	0.013	-0.03	0.016	0
YER070W	rnr1Y285F	YLR023C	IZH3	1.02685	0.012	1.05034	0.025	-0.03	0.012	0
YER070W	rnr1Y285F	YGR038W	ORM1	0.97345	0.022	1.00387	0.001	-0.02986	0.022	0
YER070W	rnr1Y285F	YMR252C	YMR252C	0.97656	0.026	1.0088	0.013	-0.02985	0.026	1e-05
YER070W	rnr1Y285F	YGR210C	YGR210C	1.03198	0.017	1.06044	0.032	-0.02982	0.017	0
YER070W	rnr1Y285F	YCL044C	MGR1	0.96555	0.034	0.9951	0.018	-0.02979	0.034	1e-05
YER070W	rnr1Y285F	YKL171W	NNK1	0.94498	0.064	0.98536	0.047	-0.02976	0.064	8e-05
YER070W	rnr1Y285F	YOR044W	IRC23	1.0151	0.006	1.04006	0.015	-0.02971	0.006	0
YER070W	rnr1Y285F	YCR092C	MSH3	0.99355	0.029	1.02423	0.002	-0.02966	0.029	1e-05
YER070W	rnr1Y285F	YPL130W	SPO19	0.99028	0.006	1.02182	0.05	-0.02962	0.006	1e-05
YER070W	rnr1Y285F	YLR438W	CAR2	0.96961	0.006	0.99597	0.01	-0.02961	0.006	1e-05
YER070W	rnr1Y285F	YHR031C	RRM3	0.96578	0.006	0.99438	0.012	-0.02959	0.006	1e-05
YER070W	rnr1Y285F	YGR040W	KSS1	0.96283	0.015	0.99475	0.008	-0.02959	0.015	0
YER070W	rnr1Y285F	YHL017W	YHL017W	0.98725	0.012	1.01915	0.011	-0.02955	0.012	0
YER070W	rnr1Y285F	YGL104C	VPS73	0.99723	0.006	1.02214	0.023	-0.02954	0.006	0
YER070W	rnr1Y285F	YOR040W	GLO4	1.02535	0.043	1.05804	0.047	-0.02944	0.043	2e-05
YER070W	rnr1Y285F	YGR238C	KEL2	0.99031	0.006	1.02599	0.031	-0.02939	0.006	0
YER070W	rnr1Y285F	YHR045W	YHR045W	0.99911	0.065	1.02281	0.048	-0.02938	0.065	8e-05
YER070W	rnr1Y285F	YOR283W	YOR283W	0.99735	0.008	1.02579	0.009	-0.02936	0.008	2e-05
YER070W	rnr1Y285F	YGR270W	YTA7	0.67042	0.129	0.69768	0.039	-0.02934	0.129	0.00188
YER070W	rnr1Y285F	YKR050W	TRK2	0.95245	0.053	0.9959	0.043	-0.02927	0.053	5e-05
YER070W	rnr1Y285F	YGL161C	YIP5	1.03624	0.014	1.06695	0.004	-0.02926	0.014	6e-05
YER070W	rnr1Y285F	YMR255W	GFD1	0.99885	0.014	1.02959	0.016	-0.0292	0.014	7e-05
YER070W	rnr1Y285F	YGL087C	MMS2	1.08174	0.026	1.11448	0.028	-0.02919	0.026	0
YER070W	rnr1Y285F	YML100W	TSL1	0.98307	0.009	1.00846	0.011	-0.02918	0.009	0
YER070W	rnr1Y285F	YPL086C	ELP3	0.85337	0.003	0.88094	0.017	-0.02914	0.003	0
YER070W	rnr1Y285F	YHR033W	YHR033W	0.97056	0.054	1.00126	0.017	-0.02912	0.054	5e-05
YER070W	rnr1Y285F	YPR021C	AGC1	0.99762	0.049	1.02638	0.005	-0.02911	0.049	3e-05
YER070W	rnr1Y285F	YPL098C	MGR2	0.96439	0.004	0.99147	0.014	-0.02905	0.004	1e-05
YER070W	rnr1Y285F	YKR045C	YKR045C	1.03507	0.001	1.06612	0.022	-0.02904	0.001	0
YER070W	rnr1Y285F	YOR161C	PNS1	0.97589	0.033	0.99512	0.029	-0.02898	0.033	1e-05
YER070W	rnr1Y285F	YLR351C	NIT3	0.98255	0.021	1.01237	0.025	-0.02897	0.021	0
YER070W	rnr1Y285F	YLR137W	RKM5	1.04062	0.007	1.06981	0.039	-0.02888	0.007	2e-05
YER070W	rnr1Y285F	YLR211C	YLR211C	1.01293	0.026	1.048	0.018	-0.02882	0.026	0
YER070W	rnr1Y285F	YOR280C	FSH3	0.98475	0.044	1.0157	0.021	-0.0288	0.044	3e-05
YER070W	rnr1Y285F	YMR030W	RSF1	1.01343	0.092	1.05055	0.051	-0.02879	0.092	0.0002
YER070W	rnr1Y285F	YLR070C	XYL2	0.98821	0.027	1.01554	0.02	-0.02879	0.027	1e-05
YER070W	rnr1Y285F	YNL053W	MSG5	0.97789	0.013	1.00147	0.019	-0.02876	0.013	0
YER070W	rnr1Y285F	YBR018C	GAL7	1.01428	0.056	1.04731	0.049	-0.02867	0.056	5e-05
YER070W	rnr1Y285F	YOR050C	YOR050C	1.00374	0.032	1.02854	0.033	-0.02867	0.032	1e-05
YER070W	rnr1Y285F	YML028W	TSA1	0.83781	0.054	0.86448	0.005	-0.02862	0.054	8e-05
YER070W	rnr1Y285F	YOL090W	MSH2	0.82796	0.025	0.86075	0.037	-0.02849	0.025	1e-05
YER070W	rnr1Y285F	YHL040C	ARN1	0.97261	0.021	0.98781	0.045	-0.02844	0.021	0.00015
YER070W	rnr1Y285F	YBL067C	UBP13	0.9882	0.008	1.01578	0.018	-0.02842	0.008	2e-05
YER070W	rnr1Y285F	YDR445C	YDR445C	0.96326	0.017	0.99361	0.017	-0.02836	0.017	0
YER070W	rnr1Y285F	YPR079W	MRL1	0.93608	0.162	0.96647	0.115	-0.02836	0.162	0.00138
YER070W	rnr1Y285F	YBR150C	TBS1	0.95519	0.01	0.98384	0.005	-0.02828	0.01	0
YER070W	rnr1Y285F	YBR240C	THI2	0.98092	0.021	1.00587	0.029	-0.02822	0.021	0
YER070W	rnr1Y285F	YBR145W	ADH5	0.99398	0.018	1.02453	0.019	-0.02822	0.018	0
YER070W	rnr1Y285F	YBR165W	UBS1	0.79164	0.039	0.81799	0.01	-0.02822	0.039	3e-05
YER070W	rnr1Y285F	YPL103C	FMP30	1.00505	0.036	1.03314	0.017	-0.02818	0.036	1e-05
YER070W	rnr1Y285F	YLR049C	YLR049C	1.03899	0.022	1.06636	0.029	-0.02816	0.022	0
YER070W	rnr1Y285F	YKL090W	CUE2	1.02869	0.015	1.05677	0.004	-0.02809	0.015	0
YER070W	rnr1Y285F	YIL032C	YIL032C	1.02164	0.014	1.04962	0.027	-0.02805	0.014	0
YER070W	rnr1Y285F	YKL063C	YKL063C	1.04622	0.044	1.06779	0.028	-0.02793	0.044	2e-05
YER070W	rnr1Y285F	YDR368W	YPR1	0.99638	0.027	1.02306	0.015	-0.02792	0.027	1e-05
YER070W	rnr1Y285F	YJR005W	APL1	0.99696	0.009	1.02517	0.003	-0.02788	0.009	3e-05
YER070W	rnr1Y285F	YER163C	GCG1	1.00743	0.007	1.03518	0.004	-0.02778	0.007	0
YER070W	rnr1Y285F	YKL167C	MRP49	0.96576	0.022	0.99305	0.002	-0.02774	0.022	0.00018
YER070W	rnr1Y285F	YIL155C	GUT2	0.97012	0.041	0.99332	0.01	-0.02769	0.041	2e-05
YER070W	rnr1Y285F	YIL096C	YIL096C	1.04968	0.037	1.07154	0.012	-0.02766	0.037	1e-05
YER070W	rnr1Y285F	YHR200W	RPN10	0.93324	0.007	0.95922	0.019	-0.02765	0.007	0
YER070W	rnr1Y285F	YDR157W	YDR157W	1.07637	0.015	1.10317	0.008	-0.02764	0.015	0
YER070W	rnr1Y285F	YNR014W	YNR014W	1.06678	0.028	1.09247	0.023	-0.02756	0.028	1e-05
YER070W	rnr1Y285F	YDR242W	AMD2	1.01636	0.028	1.04842	0.013	-0.02755	0.028	0.00026
YER070W	rnr1Y285F	YLR013W	GAT3	1.02833	0.027	1.05608	0.032	-0.02749	0.027	0
YER070W	rnr1Y285F	YIL166C	YIL166C	0.89795	0.146	0.92023	0.14	-0.02735	0.146	0.00116
YER070W	rnr1Y285F	YKR021W	ALY1	1.00942	0.006	1.03473	0.004	-0.02734	0.006	1e-05
YER070W	rnr1Y285F	YMR162C	DNF3	1.03504	0.004	1.05995	0.013	-0.02729	0.004	1e-05
YER070W	rnr1Y285F	YDL188C	PPH22	0.9627	0.032	0.99079	0.005	-0.02726	0.032	1e-05
YER070W	rnr1Y285F	YGR033C	TIM21	1.03647	0.013	1.06616	0.007	-0.02723	0.013	0
YER070W	rnr1Y285F	YGR233C	PHO81	1.01113	0.026	1.03541	0.012	-0.02715	0.026	0
YER070W	rnr1Y285F	YBL070C	YBL070C	0.95412	0.005	0.97964	0.011	-0.02713	0.005	1e-05
YER070W	rnr1Y285F	YKL092C	BUD2	0.9524	0.025	0.98357	0.008	-0.02712	0.025	1e-05
YER070W	rnr1Y285F	YLR233C	EST1	0.97823	0.029	1.00698	0.081	-0.02709	0.029	1e-05
YER070W	rnr1Y285F	YOL063C	CRT10	1.0064	0.011	1.03381	0.003	-0.02692	0.011	0
YER070W	rnr1Y285F	YDR317W	HIM1	0.99234	0.043	1.01813	0.034	-0.02689	0.043	2e-05
YER070W	rnr1Y285F	YMR153W	NUP53	1.05485	0.064	1.08698	0.032	-0.02687	0.064	6e-05
YER070W	rnr1Y285F	YOR051C	ETT1	1.0592	0.015	1.08554	0.014	-0.02681	0.015	0
YER070W	rnr1Y285F	YOR167C	RPS28A	0.96488	0.047	0.98737	0.046	-0.0268	0.047	3e-05
YER070W	rnr1Y285F	YPL026C	SKS1	0.94181	0.005	0.96942	0.006	-0.02675	0.005	1e-05
YER070W	rnr1Y285F	YIL025C	YIL025C	1.00309	0.036	1.02922	0.01	-0.02675	0.036	1e-05
YER070W	rnr1Y285F	YKR011C	YKR011C	1.03337	0.002	1.05744	0.018	-0.02673	0.002	0
YER070W	rnr1Y285F	YDL238C	GUD1	1.03918	0.006	1.06493	0.017	-0.02672	0.006	1e-05
YER070W	rnr1Y285F	YKL051W	SFK1	0.90298	0.144	0.89252	0.185	-0.02669	0.144	0.00109
YER070W	rnr1Y285F	YIL010W	DOT5	0.98509	0.03	1.01321	0.007	-0.02666	0.03	1e-05
YER070W	rnr1Y285F	YBR178W	YBR178W	1.0685	0.025	1.09265	0.003	-0.0266	0.024	0
YER070W	rnr1Y285F	YOL003C	PFA4	0.93839	0.02	0.96664	0.027	-0.02658	0.02	0
YER070W	rnr1Y285F	YMR105C	PGM2	0.97553	0.034	0.99709	0.02	-0.02656	0.034	1e-05
YER070W	rnr1Y285F	YOL046C	YOL046C	0.95381	0.028	0.97856	0.031	-0.02656	0.028	1e-05
YER070W	rnr1Y285F	YKR096W	ESL2	1.03918	0.002	1.06539	0.011	-0.02655	0.002	0
YER070W	rnr1Y285F	YDL213C	NOP6	0.95895	0.067	0.98652	0.002	-0.02654	0.067	9e-05
YER070W	rnr1Y285F	YDR428C	BNA7	1.05661	0.005	1.08187	0.008	-0.0265	0.005	0
YER070W	rnr1Y285F	YJL037W	IRC18	0.96006	0.082	0.98248	0.032	-0.02649	0.082	0.00017
YER070W	rnr1Y285F	YGR209C	TRX2	0.9885	0.017	1.01359	0.02	-0.02649	0.017	0
YER070W	rnr1Y285F	YLR292C	SEC72	0.99418	0.005	1.02332	0.044	-0.02649	0.005	0
YER070W	rnr1Y285F	YPL207W	TYW1	0.97605	0.021	1.00387	0.01	-0.02647	0.021	0
YER070W	rnr1Y285F	YKR054C	DYN1	1.02098	0.003	1.04506	0.012	-0.02646	0.003	0
YER070W	rnr1Y285F	YGR279C	SCW4	1.01077	0.06	1.02708	0.066	-0.02644	0.06	6e-05
YER070W	rnr1Y285F	YGL054C	ERV14	0.95669	0.004	0.97905	0.036	-0.02642	0.004	0
YER070W	rnr1Y285F	YIL042C	PKP1	0.97091	0.025	0.99576	0.034	-0.02635	0.025	0
YER070W	rnr1Y285F	YOR266W	PNT1	0.94439	0.009	0.97048	0.026	-0.02629	0.009	3e-05
YER070W	rnr1Y285F	YFR032C	RRT5	1.0262	0.019	1.05533	0.032	-0.02629	0.019	0
YER070W	rnr1Y285F	YLR124W	YLR124W	0.95582	0.028	0.98221	0.04	-0.02628	0.027	1e-05
YER070W	rnr1Y285F	YPL174C	NIP100	0.68171	0.019	0.70597	0.017	-0.02627	0.019	1e-05
YER070W	rnr1Y285F	YLR453C	RIF2	1.03641	0.029	1.06058	0.029	-0.02617	0.029	1e-05
YER070W	rnr1Y285F	YNR033W	ABZ1	1.04252	0.005	1.06627	0.014	-0.02609	0.005	1e-05
YER070W	rnr1Y285F	YAL015C	NTG1	0.97861	0.008	1.004	0.004	-0.02609	0.008	2e-05
YER070W	rnr1Y285F	YMR303C	ADH2	0.98826	0.004	1.01778	0.04	-0.02601	0.004	1e-05
YER070W	rnr1Y285F	YHR021W-A	ECM12	1.02391	0.003	1.05199	0.007	-0.02584	0.003	0
YER070W	rnr1Y285F	YOR170W	YOR170W	1.01875	0.024	1.03997	0.026	-0.02582	0.024	0
YER070W	rnr1Y285F	YFL044C	OTU1	1.00086	0.014	1.02763	0.013	-0.02577	0.014	0
YER070W	rnr1Y285F	YBR095C	RXT2	0.93235	0.01	0.95885	0.009	-0.02577	0.01	4e-05
YER070W	rnr1Y285F	YDL146W	LDB17	0.98999	0.068	1.0175	0.013	-0.02573	0.068	9e-05
YER070W	rnr1Y285F	YML059C	NTE1	1.03114	0.034	1.0535	0.005	-0.02572	0.034	1e-05
YER070W	rnr1Y285F	YOR083W	WHI5	0.95103	0.03	0.96995	0.027	-0.0257	0.03	0.00034
YER070W	rnr1Y285F	YHR030C	SLT2	0.82706	0.014	0.84958	0.019	-0.0256	0.014	0
YER070W	rnr1Y285F	YOR177C	MPC54	1.08267	0.009	1.10797	0.009	-0.0255	0.009	0
YER070W	rnr1Y285F	YPL139C	UME1	0.93911	0.038	0.96763	0.026	-0.02549	0.038	2e-05
YER070W	rnr1Y285F	YLR460C	YLR460C	1.00333	0.028	1.03497	0.025	-0.02546	0.028	1e-05
YER070W	rnr1Y285F	YLR231C	BNA5	1.00105	0.059	1.03015	0.025	-0.02533	0.059	6e-05
YER070W	rnr1Y285F	YMR191W	SPG5	1.02851	0.025	1.05618	0.035	-0.0253	0.025	0
YER070W	rnr1Y285F	YJL100W	LSB6	1.04269	0.03	1.07013	0.022	-0.02526	0.03	1e-05
YER070W	rnr1Y285F	YIL023C	YKE4	1.01769	0.017	1.04411	0.016	-0.02525	0.017	0
YER070W	rnr1Y285F	YNL020C	ARK1	0.94336	0.024	0.96693	0.014	-0.02525	0.024	0.00021
YER070W	rnr1Y285F	YHR049C-A	YHR049C-A	1.01761	0.019	1.04529	0.016	-0.02518	0.019	0
YER070W	rnr1Y285F	YOL001W	PHO80	0.96968	0.034	0.99379	0	-0.02514	0.034	1e-05
YER070W	rnr1Y285F	YNL035C	YNL035C	0.96213	0.037	0.9868	0.015	-0.0251	0.037	2e-05
YER070W	rnr1Y285F	YKR034W	DAL80	0.9855	0.032	1.00851	0.021	-0.02506	0.032	1e-05
YER070W	rnr1Y285F	YNR020C	ATP23	0.88141	0.017	0.90711	0.013	-0.02488	0.017	0
YER070W	rnr1Y285F	YPL184C	MRN1	0.98176	0.054	1.0051	0.006	-0.02484	0.054	5e-05
YER070W	rnr1Y285F	YMR224C	MRE11	0.1688	0.048	0.20176	0.097	-0.02481	0.048	0.00588
YER070W	rnr1Y285F	YMR153C-A	YMR153C-A	1.03785	0.022	1.05304	0.041	-0.02479	0.022	0
YER070W	rnr1Y285F	YMR107W	SPG4	1.0127	0.032	1.03275	0.019	-0.02476	0.032	1e-05
YER070W	rnr1Y285F	YMR234W	RNH1	1.09535	0.03	1.11908	0.01	-0.02469	0.03	1e-05
YER070W	rnr1Y285F	YGR003W	CUL3	0.93608	0.099	0.96471	0.038	-0.02468	0.099	0.00032
YER070W	rnr1Y285F	YHR171W	ATG7	0.95867	0.006	0.98175	0.01	-0.02465	0.006	1e-05
YER070W	rnr1Y285F	YBR125C	PTC4	0.98207	0.066	1.00586	0.045	-0.02457	0.066	8e-05
YER070W	rnr1Y285F	YLR188W	MDL1	0.93949	0.029	0.9605	0.027	-0.02455	0.029	1e-05
YER070W	rnr1Y285F	YMR007W	YMR007W	1.03661	0.008	1.05493	0.022	-0.02452	0.008	0
YER070W	rnr1Y285F	YKR097W	PCK1	0.64291	0.363	0.66104	0.126	-0.02448	0.363	0.03833
YER070W	rnr1Y285F	YOL091W	SPO21	0.92484	0.087	0.94913	0.022	-0.02447	0.087	0.00023
YER070W	rnr1Y285F	YMR101C	SRT1	1.01613	0.024	1.03607	0.043	-0.02446	0.024	0
YER070W	rnr1Y285F	YPR071W	YPR071W	0.95776	0.029	0.97998	0.014	-0.02442	0.029	1e-05
YER070W	rnr1Y285F	YGR154C	GTO1	0.97233	0.008	0.9801	0.031	-0.02437	0.008	2e-05
YER070W	rnr1Y285F	YOL114C	YOL114C	1.00251	0.024	1.02217	0.015	-0.02437	0.024	0
YER070W	rnr1Y285F	YOR166C	SWT1	0.98262	0.024	1.00515	0.025	-0.02435	0.024	0
YER070W	rnr1Y285F	YLR173W	YLR173W	1.06253	0.014	1.08949	0.028	-0.02433	0.014	0
YER070W	rnr1Y285F	YLL015W	BPT1	1.01785	0.012	1.04292	0.025	-0.02432	0.012	0
YER070W	rnr1Y285F	YGL229C	SAP4	1.02494	0.01	1.05173	0.035	-0.02431	0.01	3e-05
YER070W	rnr1Y285F	YCL026C-A	FRM2	1.0183	0.045	1.04967	0.033	-0.02427	0.045	2e-05
YER070W	rnr1Y285F	YGR223C	HSV2	0.97533	0.031	1.00133	0.024	-0.02427	0.031	1e-05
YER070W	rnr1Y285F	YIR036C	IRC24	1.0349	0.019	1.05852	0.014	-0.02417	0.019	0
YER070W	rnr1Y285F	YPL112C	PEX25	0.95596	0.069	0.97383	0.032	-0.02411	0.069	0.00011
YER070W	rnr1Y285F	YER176W	ECM32	0.97003	0.022	0.99509	0.003	-0.02408	0.022	0
YER070W	rnr1Y285F	YFR012W	DCV1	0.94857	0.01	0.97235	0.029	-0.02408	0.01	0
YER070W	rnr1Y285F	YNR013C	PHO91	0.97966	0.06	0.99913	0.011	-0.02407	0.06	6e-05
YER070W	rnr1Y285F	YML090W	YML090W	0.86455	0.021	0.88622	0.004	-0.02396	0.021	0
YER070W	rnr1Y285F	YAL027W	SAW1	1.03047	0.024	1.05141	0.005	-0.02396	0.024	0
YER070W	rnr1Y285F	YLR015W	BRE2	0.76831	0.012	0.79279	0.031	-0.02394	0.012	0
YER070W	rnr1Y285F	YOR334W	MRS2	0.9894	0.07	1.00906	0.028	-0.02393	0.07	0.0001
YER070W	rnr1Y285F	YFR030W	MET10	1.00504	0.018	1.03041	0.004	-0.02389	0.018	0
YER070W	rnr1Y285F	YBR245C	ISW1	0.95231	0.013	0.9747	0.007	-0.02388	0.013	0
YER070W	rnr1Y285F	YDR486C	VPS60	0.88135	0.174	0.87568	0.108	-0.02386	0.174	0.00204
YER070W	rnr1Y285F	YAL062W	GDH3	1.04381	0.009	1.06678	0.006	-0.02385	0.009	2e-05
YER070W	rnr1Y285F	YCL074W	YCL074W	0.95392	0.029	0.97929	0.009	-0.02384	0.029	1e-05
YER070W	rnr1Y285F	YMR166C	YMR166C	0.86667	0.031	0.8793	0.056	-0.02382	0.031	1e-05
YER070W	rnr1Y285F	YBR138C	YBR138C	1.03902	0.043	1.06324	0.025	-0.02382	0.043	2e-05
YER070W	rnr1Y285F	YGL077C	HNM1	1.00252	0.008	1.02301	0.024	-0.02374	0.008	0
YER070W	rnr1Y285F	YKL121W	DGR2	1.03767	0.026	1.06167	0.03	-0.02373	0.026	0
YER070W	rnr1Y285F	YPL055C	LGE1	0.80714	0.036	0.83503	0.03	-0.02371	0.036	3e-05
YER070W	rnr1Y285F	YGL179C	TOS3	1.10929	0.01	1.13469	0.006	-0.02371	0.01	0
YER070W	rnr1Y285F	YDL091C	UBX3	0.95098	0.071	0.96912	0.021	-0.02369	0.071	0.00011
YER070W	rnr1Y285F	YFR024C	YFR024C	0.99579	0.01	1.01205	0.036	-0.02369	0.01	0
YER070W	rnr1Y285F	YDR156W	RPA14	0.91373	0.025	0.93939	0.021	-0.02365	0.025	1e-05
YER070W	rnr1Y285F	YMR294W	JNM1	0.93755	0.033	0.96232	0.028	-0.02365	0.033	1e-05
YER070W	rnr1Y285F	YKL214C	YRA2	1.02287	0.008	1.05048	0.04	-0.02364	0.008	2e-05
YER070W	rnr1Y285F	YGR288W	MAL13	1.0038	0.017	1.02824	0.005	-0.02355	0.017	0
YER070W	rnr1Y285F	YJR128W	YJR128W	1.00745	0.012	1.03296	0.008	-0.02353	0.012	0
YER070W	rnr1Y285F	YJR146W	YJR146W	1.00454	0.014	1.02726	0.003	-0.02352	0.014	0
YER070W	rnr1Y285F	YMR182C	RGM1	1.04061	0.017	1.06459	0.019	-0.02348	0.017	0
YER070W	rnr1Y285F	YBR255W	MTC4	0.93291	0.088	0.96211	0.023	-0.02348	0.088	0.00023
YER070W	rnr1Y285F	YBR137W	YBR137W	0.98382	0.025	1.00457	0.01	-0.02341	0.025	0
YER070W	rnr1Y285F	YGR206W	MVB12	0.96581	0.012	0.99647	0.045	-0.0234	0.012	0
YER070W	rnr1Y285F	YOR014W	RTS1	0.72607	0.044	0.74272	0.032	-0.02339	0.044	6e-05
YER070W	rnr1Y285F	YDL155W	CLB3	0.79397	0.087	0.81043	0.073	-0.02338	0.087	0.00395
YER070W	rnr1Y285F	YCL063W	VAC17	0.96477	0.008	0.98746	0.003	-0.0233	0.008	2e-05
YER070W	rnr1Y285F	YKR066C	CCP1	1.01178	0.026	1.03832	0.02	-0.02329	0.026	0
YER070W	rnr1Y285F	YDL066W	IDP1	1.00836	0.028	1.02954	0.022	-0.02325	0.028	1e-05
YER070W	rnr1Y285F	YHR111W	UBA4	0.86303	0.009	0.88118	0.045	-0.02322	0.009	4e-05
YER070W	rnr1Y285F	YGR242W	YGR242W	1.01631	0.014	1.03335	0.03	-0.0232	0.014	0
YER070W	rnr1Y285F	YCR024C-A	PMP1	0.96541	0.024	0.98842	0.019	-0.02318	0.024	0
YER070W	rnr1Y285F	YFR055W	IRC7	0.98585	0.007	1.00904	0.009	-0.02314	0.007	2e-05
YER070W	rnr1Y285F	YDR491C	YDR491C	1.00651	0.053	1.02817	0.031	-0.02313	0.053	4e-05
YER070W	rnr1Y285F	YGR118W	RPS23A	0.8171	0.04	0.83844	0.015	-0.02312	0.04	3e-05
YER070W	rnr1Y285F	YJL059W	YHC3	0.91739	0.088	0.93194	0.067	-0.02306	0.088	0.00024
YER070W	rnr1Y285F	YOR114W	YOR114W	1.03025	0.002	1.05178	0.003	-0.02299	0.002	0
YER070W	rnr1Y285F	YCR014C	POL4	1.03016	0.051	1.05931	0.027	-0.02296	0.051	3e-05
YER070W	rnr1Y285F	YAR023C	YAR023C	1.07449	0.018	1.09856	0.017	-0.02296	0.018	0
YER070W	rnr1Y285F	YKL064W	MNR2	0.98733	0.038	1.00886	0.004	-0.02292	0.038	2e-05
YER070W	rnr1Y285F	YGL224C	SDT1	1.05354	0.006	1.07721	0.01	-0.02291	0.006	1e-05
YER070W	rnr1Y285F	YDR001C	NTH1	0.96268	0.01	0.98862	0.008	-0.02284	0.01	0
YER070W	rnr1Y285F	YDR424C	DYN2	1.01122	0.019	1.03011	0.034	-0.02273	0.019	0
YER070W	rnr1Y285F	YMR036C	MIH1	0.98283	0.005	1.00687	0.018	-0.0227	0.005	1e-05
YER070W	rnr1Y285F	YOR071C	NRT1	1.00895	0.029	1.02651	0.016	-0.02269	0.029	1e-05
YER070W	rnr1Y285F	YBR222C	PCS60	1.01543	0.014	1.03616	0.007	-0.02268	0.014	0
YER070W	rnr1Y285F	YJL197W	UBP12	0.99536	0.007	1.02218	0.018	-0.02266	0.007	1e-05
YER070W	rnr1Y285F	YJR021C	REC107	0.95996	0.003	0.9838	0.008	-0.02266	0.003	0
YER070W	rnr1Y285F	YOL025W	LAG2	0.97287	0.029	0.99411	0.008	-0.02258	0.029	1e-05
YER070W	rnr1Y285F	YGR031W	IMO32	1.03675	0.026	1.06263	0.006	-0.02257	0.026	0
YER070W	rnr1Y285F	YBR238C	YBR238C	0.88242	0.131	0.87541	0.164	-0.02256	0.131	0.00088
YER070W	rnr1Y285F	YCR082W	AHC2	1.00584	0.009	1.0249	0.017	-0.02253	0.009	0
YER070W	rnr1Y285F	YLL048C	YBT1	0.99554	0.049	1.02319	0.016	-0.02252	0.049	3e-05
YER070W	rnr1Y285F	YJL159W	HSP150	1.0786	0.003	1.10006	0.021	-0.02251	0.003	0
YER070W	rnr1Y285F	YLR450W	HMG2	0.96034	0.016	0.98427	0.016	-0.02251	0.016	0
YER070W	rnr1Y285F	YLL024C	SSA2	1.02389	0.01	1.0479	0.013	-0.02249	0.01	0
YER070W	rnr1Y285F	YHR078W	YHR078W	1.15078	0.012	1.17299	0.008	-0.02247	0.012	0
YER070W	rnr1Y285F	YFR057W	YFR057W	1.00633	0.035	1.01772	0.044	-0.02244	0.035	1e-05
YER070W	rnr1Y285F	YOL098C	YOL098C	1.04037	0.065	1.06787	0.029	-0.02239	0.065	7e-05
YER070W	rnr1Y285F	YCL064C	CHA1	1.01654	0	1.0403	0.007	-0.02237	0	0
YER070W	rnr1Y285F	YKR103W	NFT1	0.9925	0.026	1.02159	0.086	-0.02232	0.026	1e-05
YER070W	rnr1Y285F	YBR103W	SIF2	0.97347	0.016	0.99638	0.007	-0.02228	0.016	0
YER070W	rnr1Y285F	YDL114W	YDL114W	0.98209	0.022	1.00464	0.008	-0.02222	0.022	0
YER070W	rnr1Y285F	YKL085W	MDH1	0.96686	0.03	0.98756	0.006	-0.0222	0.03	1e-05
YER070W	rnr1Y285F	YLR252W	YLR252W	1.02055	0.037	1.03974	0.045	-0.02217	0.037	1e-05
YER070W	rnr1Y285F	YLR216C	CPR6	1.07738	0.023	1.09801	0.01	-0.02212	0.023	0
YER070W	rnr1Y285F	YKL114C	APN1	1.00382	0.006	1.02171	0.009	-0.0221	0.006	1e-05
YER070W	rnr1Y285F	YHR039C	MSC7	1.03228	0.03	1.05284	0.033	-0.02209	0.03	1e-05
YER070W	rnr1Y285F	YHR121W	LSM12	0.99427	0.04	1.01669	0.034	-0.02208	0.04	2e-05
YER070W	rnr1Y285F	YOL117W	RRI2	0.99174	0.021	1.01396	0.004	-0.02206	0.021	0
YER070W	rnr1Y285F	YKR027W	BCH2	1.00578	0.009	1.02939	0.031	-0.02205	0.009	2e-05
YER070W	rnr1Y285F	YBR227C	MCX1	0.9571	0.014	0.97871	0.011	-0.02201	0.014	0
YER070W	rnr1Y285F	YGR028W	MSP1	0.99609	0.01	1.01807	0.01	-0.02197	0.01	0
YER070W	rnr1Y285F	YLR142W	PUT1	1.09072	0.093	1.11358	0.053	-0.02195	0.093	0.00017
YER070W	rnr1Y285F	YKR052C	MRS4	0.98578	0.005	1.00543	0.021	-0.02194	0.005	0
YER070W	rnr1Y285F	YHR132C	ECM14	1.06971	0.009	1.09647	0.019	-0.02194	0.009	0
YER070W	rnr1Y285F	YCL033C	MXR2	1.01454	0.021	1.02549	0.026	-0.02193	0.021	0
YER070W	rnr1Y285F	YGL211W	NCS6	0.908	0.006	0.93066	0.037	-0.02191	0.006	1e-05
YER070W	rnr1Y285F	YOR080W	DIA2	0.67187	0.005	0.69052	0.033	-0.02187	0.005	2e-05
YER070W	rnr1Y285F	YDR516C	EMI2	1.0555	0.01	1.07573	0.016	-0.02178	0.01	0
YER070W	rnr1Y285F	YHR140W	YHR140W	1.01176	0.01	1.03143	0.019	-0.02168	0.01	0
YER070W	rnr1Y285F	YDR276C	PMP3	0.6889	0.019	0.70469	0.027	-0.02164	0.019	0.00025
YER070W	rnr1Y285F	YCR088W	ABP1	1.00271	0.019	1.02243	0.01	-0.02161	0.019	0
YER070W	rnr1Y285F	YER167W	BCK2	0.97563	0.018	0.99737	0.005	-0.02157	0.018	0
YER070W	rnr1Y285F	YLR257W	YLR257W	1.0288	0.039	1.04065	0.054	-0.02157	0.039	2e-05
YER070W	rnr1Y285F	YBL061C	SKT5	0.97208	0.001	0.99447	0.004	-0.02153	0.001	0
YER070W	rnr1Y285F	YLR135W	SLX4	0.97989	0.009	1.00394	0.03	-0.02153	0.009	0
YER070W	rnr1Y285F	YKL050C	YKL050C	1.09887	0.028	1.11941	0.022	-0.02152	0.028	0
YER070W	rnr1Y285F	YIL117C	PRM5	0.98821	0.002	1.01308	0.009	-0.02151	0.002	0
YER070W	rnr1Y285F	YGR205W	TDA10	1.03773	0.022	1.06092	0.01	-0.02147	0.021	0
YER070W	rnr1Y285F	YPL067C	YPL067C	1.03725	0.033	1.06058	0.025	-0.02143	0.033	1e-05
YER070W	rnr1Y285F	YGL079W	KXD1	1.0218	0.01	1.0438	0.005	-0.02139	0.01	0
YER070W	rnr1Y285F	YJL112W	MDV1	0.96888	0.004	0.99154	0.012	-0.02132	0.004	1e-05
YER070W	rnr1Y285F	YJL187C	SWE1	0.60415	0.296	0.63227	0.172	-0.02132	0.296	0.02664
YER070W	rnr1Y285F	YOL080C	REX4	0.9746	0.042	1.00042	0.029	-0.02131	0.042	2e-05
YER070W	rnr1Y285F	YML048W-A	YML048W-A	1.03533	0.026	1.05284	0.042	-0.0213	0.026	0
YER070W	rnr1Y285F	YJL058C	BIT61	1.03635	0.023	1.05943	0.006	-0.02129	0.023	0
YER070W	rnr1Y285F	YPL136W	YPL136W	1.00938	0.022	1.02982	0.009	-0.02128	0.022	0
YER070W	rnr1Y285F	YIL099W	SGA1	1.01005	0.012	1.02707	0.024	-0.02126	0.012	0
YER070W	rnr1Y285F	YJL016W	YJL016W	0.96814	0.026	0.98707	0.011	-0.02125	0.026	1e-05
YER070W	rnr1Y285F	YDR109C	YDR109C	1.06531	0.028	1.08303	0.022	-0.02121	0.028	1e-05
YER070W	rnr1Y285F	YKL158W	YKL158W	1.04158	0.035	1.06099	0.045	-0.02111	0.035	1e-05
YER070W	rnr1Y285F	YGR286C	BIO2	0.94324	0.002	0.96426	0.014	-0.0211	0.002	0
YER070W	rnr1Y285F	YDR382W	RPP2B	0.9943	0.034	1.01498	0.019	-0.02109	0.034	1e-05
YER070W	rnr1Y285F	YMR002W	MIC17	1.08648	0.086	1.1156	0.033	-0.02109	0.086	0.00013
YER070W	rnr1Y285F	YKR013W	PRY2	1.04817	0.031	1.06309	0.014	-0.02108	0.031	1e-05
YER070W	rnr1Y285F	YKL027W	YKL027W	1.0552	0.005	1.07597	0.006	-0.02105	0.005	0
YER070W	rnr1Y285F	YAL064C-A	TDA8	0.99844	0.002	1.01797	0.006	-0.021	0.002	0
YER070W	rnr1Y285F	YLR265C	NEJ1	1.00801	0.012	1.02769	0.018	-0.02099	0.012	0
YER070W	rnr1Y285F	YKL202W	YKL202W	1.0197	0.029	1.04197	0.016	-0.02094	0.029	1e-05
YER070W	rnr1Y285F	YCL060C	YCL060C	0.92413	0.014	0.9459	0.009	-0.0209	0.014	0
YER070W	rnr1Y285F	YOL032W	OPI10	0.94569	0.046	0.96539	0.034	-0.02085	0.046	3e-05
YER070W	rnr1Y285F	YLR133W	CKI1	1.08667	0.038	1.10513	0.006	-0.02074	0.038	1e-05
YER070W	rnr1Y285F	YMR053C	STB2	0.96569	0.004	0.98312	0.027	-0.02073	0.004	0
YER070W	rnr1Y285F	YOL083W	ATG34	1.03011	0.077	1.04993	0.008	-0.02073	0.077	0.00011
YER070W	rnr1Y285F	YNR042W	YNR042W	1.00163	0.021	1.02192	0.002	-0.02069	0.021	0
YER070W	rnr1Y285F	YLR324W	PEX30	0.99381	0.034	1.00942	0.03	-0.02069	0.034	1e-05
YER070W	rnr1Y285F	YLR408C	BLS1	1.07248	0.042	1.09217	0.021	-0.02069	0.042	2e-05
YER070W	rnr1Y285F	YHR103W	SBE22	0.9664	0.026	0.98912	0.051	-0.02068	0.026	1e-05
YER070W	rnr1Y285F	YBR269C	FMP21	0.95117	0.006	0.97714	0.021	-0.02065	0.006	1e-05
YER070W	rnr1Y285F	YLL006W	MMM1	0.89679	0.003	0.90748	0.052	-0.02064	0.003	0
YER070W	rnr1Y285F	YIL141W	YIL141W	1.10666	0.033	1.12817	0.011	-0.02062	0.033	1e-05
YER070W	rnr1Y285F	YCR076C	FUB1	1.0718	0.025	1.08098	0.024	-0.02058	0.025	0.00018
YER070W	rnr1Y285F	YGL132W	YGL132W	0.98029	0.013	1.0014	0.01	-0.02058	0.013	0
YER070W	rnr1Y285F	YBL057C	PTH2	1.01604	0.034	1.04112	0.01	-0.02051	0.034	1e-05
YER070W	rnr1Y285F	YIL161W	YIL161W	0.92949	0.02	0.94847	0.008	-0.02048	0.02	0
YER070W	rnr1Y285F	YBL048W	YBL048W	0.99063	0.012	1.00939	0.01	-0.02048	0.011	0
YER070W	rnr1Y285F	YDR314C	RAD34	0.95665	0.044	0.97122	0.034	-0.02047	0.044	3e-05
YER070W	rnr1Y285F	YOR252W	TMA16	0.95953	0.02	0.97724	0.015	-0.02045	0.02	0
YER070W	rnr1Y285F	YOR141C	ARP8	0.03576	0.006	0.05642	0.001	-0.02044	0.006	0.0086
YER070W	rnr1Y285F	YBL037W	APL3	0.96388	0.014	0.98645	0.018	-0.02043	0.014	0
YER070W	rnr1Y285F	YJR011C	YJR011C	0.98014	0.035	1.00004	0.011	-0.02041	0.035	1e-05
YER070W	rnr1Y285F	YLR370C	ARC18	0.90156	0.012	0.92336	0.017	-0.02041	0.012	0
YER070W	rnr1Y285F	YKL110C	KTI12	0.78607	0.058	0.81458	0.03	-0.02038	0.058	0.00011
YER070W	rnr1Y285F	YDL210W	UGA4	1.05105	0.002	1.06983	0.005	-0.02033	0.002	0
YER070W	rnr1Y285F	YIL009C-A	EST3	1.04876	0.009	1.06793	0.007	-0.02033	0.009	2e-05
YER070W	rnr1Y285F	YHL012W	YHL012W	0.98166	0.011	1.00333	0.009	-0.02028	0.011	4e-05
YER070W	rnr1Y285F	YLR112W	YLR112W	0.96441	0.017	0.98054	0.027	-0.02023	0.017	0
YER070W	rnr1Y285F	YDL033C	SLM3	0.87476	0.025	0.8913	0.027	-0.02015	0.025	1e-05
YER070W	rnr1Y285F	YBL009W	ALK2	1.00911	0.027	1.01048	0.037	-0.02012	0.027	0.00024
YER070W	rnr1Y285F	YLR392C	ART10	0.99072	0.003	1.00805	0.021	-0.02012	0.003	0
YER070W	rnr1Y285F	YAR044W	YAR044W	0.9484	0.038	0.97026	0.005	-0.02008	0.038	2e-05
YER070W	rnr1Y285F	YDR522C	SPS2	1.00689	0.046	1.03101	0.02	-0.02004	0.046	3e-05
YER070W	rnr1Y285F	YJL152W	YJL152W	0.9989	0.003	1.01864	0.003	-0.02002	0.003	0
YER070W	rnr1Y285F	YJL043W	YJL043W	1.05945	0.012	1.07656	0.006	-0.01995	0.012	0
YER070W	rnr1Y285F	YMR119W-A	YMR119W-A	1.00538	0.017	1.02302	0.006	-0.01989	0.017	0
YER070W	rnr1Y285F	YOL029C	YOL029C	0.99635	0.016	1.01498	0.001	-0.01986	0.016	0
YER070W	rnr1Y285F	YLR284C	ECI1	1.02097	0.017	1.03694	0.018	-0.01985	0.017	0
YER070W	rnr1Y285F	YNL119W	NCS2	0.89797	0.014	0.92235	0.031	-0.01984	0.014	0
YER070W	rnr1Y285F	YIL079C	AIR1	1.03592	0.019	1.05189	0.015	-0.01983	0.019	0
YER070W	rnr1Y285F	YCR085W	YCR085W	1.08588	0.024	1.10744	0.002	-0.01983	0.024	0
YER070W	rnr1Y285F	YDR055W	PST1	1.03791	0.016	1.0602	0.016	-0.01969	0.016	0
YER070W	rnr1Y285F	YIL119C	RPI1	0.99992	0.022	1.01863	0.012	-0.01968	0.022	0
YER070W	rnr1Y285F	YGR018C	YGR018C	0.97196	0.027	0.99706	0.024	-0.01966	0.027	1e-05
YER070W	rnr1Y285F	YDR330W	UBX5	1.0797	0.022	1.09424	0.021	-0.0196	0.022	0
YER070W	rnr1Y285F	YAL017W	PSK1	1.004	0.008	1.02148	0.019	-0.01957	0.008	2e-05
YER070W	rnr1Y285F	YAL058W	CNE1	0.93582	0.037	0.95788	0.006	-0.01957	0.037	2e-05
YER070W	rnr1Y285F	YDR411C	DFM1	0.95568	0.019	0.97273	0.031	-0.01952	0.019	0
YER070W	rnr1Y285F	YIL052C	RPL34B	1.02831	0.005	1.04506	0.015	-0.0195	0.005	0
YER070W	rnr1Y285F	YBR095C	RXT2	0.92292	0.021	0.94029	0.024	-0.01949	0.021	0
YER070W	rnr1Y285F	YDR508C	GNP1	0.53841	0.158	0.55772	0.021	-0.0194	0.158	0.00651
YER070W	rnr1Y285F	YDL134C	PPH21	1.00466	0.021	1.02412	0.009	-0.01932	0.021	0
YER070W	rnr1Y285F	YLR446W	YLR446W	0.98279	0.003	0.99621	0.024	-0.01929	0.003	0
YER070W	rnr1Y285F	YJR052W	RAD7	0.9903	0.028	1.0132	0.013	-0.01926	0.028	1e-05
YER070W	rnr1Y285F	YIR029W	DAL2	1.07103	0.023	1.08689	0.021	-0.01922	0.023	0
YER070W	rnr1Y285F	YHR185C	PFS1	0.98916	0.022	1.00721	0.005	-0.01922	0.022	0
YER070W	rnr1Y285F	YLR330W	CHS5	0.93897	0.039	0.94767	0.051	-0.01922	0.038	2e-05
YER070W	rnr1Y285F	YOL122C	SMF1	1.03233	0.025	1.0532	0.019	-0.01919	0.025	0
YER070W	rnr1Y285F	YLR102C	APC9	1.01925	0.02	1.03974	0.025	-0.01913	0.02	0
YER070W	rnr1Y285F	YMR095C	SNO1	1.04186	0.02	1.05952	0.001	-0.01912	0.02	0
YER070W	rnr1Y285F	YML095C	RAD10	1.02147	0.018	1.04285	0.006	-0.01909	0.018	0
YER070W	rnr1Y285F	YGR173W	RBG2	0.80999	0.038	0.82904	0.055	-0.01909	0.038	3e-05
YER070W	rnr1Y285F	YML005W	TRM12	1.01041	0.015	1.0258	0.018	-0.01906	0.015	0
YER070W	rnr1Y285F	YAL043C-A	YAL043C-A	0.95977	0.01	0.97635	0.013	-0.01906	0.01	0
YER070W	rnr1Y285F	YCR051W	YCR051W	1.08356	0.03	1.11286	0.018	-0.01903	0.03	1e-05
YER070W	rnr1Y285F	YDR309C	GIC2	1.0211	0.047	1.03157	0.031	-0.01897	0.047	3e-05
YER070W	rnr1Y285F	YKL053C-A	MDM35	0.89769	0.104	0.90828	0.087	-0.01897	0.104	0.00441
YER070W	rnr1Y285F	YBR162W-A	YSY6	0.94605	0.01	0.9644	0.015	-0.01895	0.01	0
YER070W	rnr1Y285F	YCR028C-A	RIM1	0.83906	0.037	0.85617	0.019	-0.01894	0.037	2e-05
YER070W	rnr1Y285F	YBR291C	CTP1	0.93662	0.008	0.95603	0.023	-0.01893	0.008	0
YER070W	rnr1Y285F	YCR073W-A	SOL2	0.95818	0.018	0.97674	0.013	-0.01892	0.018	0
YER070W	rnr1Y285F	YLR118C	YLR118C	1.03642	0.017	1.056	0.012	-0.01892	0.017	0
YER070W	rnr1Y285F	YBR108W	AIM3	1.05571	0.003	1.07572	0.01	-0.0189	0.003	0
YER070W	rnr1Y285F	YDR049W	VMS1	0.97198	0.053	0.99083	0.017	-0.01886	0.053	4e-05
YER070W	rnr1Y285F	YBR105C	VID24	0.9468	0.013	0.96469	0.008	-0.01886	0.013	0
YER070W	rnr1Y285F	YNL098C	RAS2	1.00111	0.017	1.01935	0.015	-0.01881	0.017	0
YER070W	rnr1Y285F	YJL051W	IRC8	1.07702	0.026	1.10016	0.036	-0.0188	0.026	0
YER070W	rnr1Y285F	YBL107C	MIC23	0.97282	0.019	0.99161	0.003	-0.01877	0.019	0
YER070W	rnr1Y285F	YFR007W	YFH7	0.98705	0.032	1.00461	0.016	-0.01874	0.032	0.00034
YER070W	rnr1Y285F	YMR254C	YMR254C	0.90721	0.03	0.93129	0.02	-0.01867	0.03	1e-05
YER070W	rnr1Y285F	YDR102C	YDR102C	1.0029	0.011	1.01965	0.027	-0.01866	0.011	0
YER070W	rnr1Y285F	YOR230W	WTM1	1.02467	0.021	1.04278	0.019	-0.01861	0.021	0
YER070W	rnr1Y285F	YOR189W	IES4	1.02057	0.003	1.0405	0.024	-0.01859	0.003	0
YER070W	rnr1Y285F	YLR348C	DIC1	1.00029	0.004	1.02684	0.031	-0.01858	0.004	0
YER070W	rnr1Y285F	YGL198W	YIP4	1.05714	0.044	1.04822	0.114	-0.01856	0.044	2e-05
YER070W	rnr1Y285F	YPR126C	YPR126C	1.01004	0.001	1.02691	0.007	-0.01854	0.001	0
YER070W	rnr1Y285F	YOR104W	PIN2	0.95664	0.04	0.9747	0.014	-0.01854	0.04	2e-05
YER070W	rnr1Y285F	YOR008C-A	YOR008C-A	0.98074	0.015	1.00107	0.006	-0.01853	0.015	0
YER070W	rnr1Y285F	YER182W	FMP10	1.00193	0.015	1.02134	0.026	-0.01846	0.015	0
YER070W	rnr1Y285F	YGR276C	RNH70	0.98852	0.023	1.0111	0.017	-0.01839	0.023	0
YER070W	rnr1Y285F	YDR475C	JIP4	1.00855	0.071	1.02788	0.003	-0.01835	0.071	0.0001
YER070W	rnr1Y285F	YPL035C	YPL035C	1.00861	0.018	1.02893	0.011	-0.01831	0.018	0
YER070W	rnr1Y285F	YDR004W	RAD57	0.80934	0.002	0.82982	0.016	-0.01829	0.002	0
YER070W	rnr1Y285F	YDR134C	YDR134C	1.04872	0.025	1.0655	0.005	-0.01823	0.025	0
YER070W	rnr1Y285F	YJL065C	DLS1	1.00479	0.018	1.02551	0.007	-0.0182	0.018	0
YER070W	rnr1Y285F	YAL049C	AIM2	0.99728	0.01	1.01472	0.002	-0.01817	0.01	0
YER070W	rnr1Y285F	YJR091C	JSN1	0.98629	0.023	1.0096	0.017	-0.01815	0.023	0
YER070W	rnr1Y285F	YBR006W	UGA2	0.99539	0.001	1.01685	0.012	-0.01813	0.001	0
YER070W	rnr1Y285F	YOR019W	YOR019W	1.03797	0.009	1.05524	0.001	-0.01813	0.009	2e-05
YER070W	rnr1Y285F	YGR197C	SNG1	0.98329	0.032	0.99218	0.02	-0.01811	0.032	1e-05
YER070W	rnr1Y285F	YJR053W	BFA1	1.05891	0.004	1.07369	0.02	-0.01806	0.004	0
YER070W	rnr1Y285F	YMR133W	REC114	1.03195	0.022	1.04731	0.011	-0.01804	0.022	0
YER070W	rnr1Y285F	YIL092W	YIL092W	0.94891	0.033	0.96439	0.015	-0.01799	0.033	1e-05
YER070W	rnr1Y285F	YPL245W	YPL245W	1.05312	0.018	1.07262	0.014	-0.01799	0.018	0
YER070W	rnr1Y285F	YDR070C	FMP16	1.02064	0.067	1.04054	0.018	-0.01798	0.067	8e-05
YER070W	rnr1Y285F	YLR090W	XDJ1	0.98482	0.004	1.00025	0.006	-0.01794	0.004	1e-05
YER070W	rnr1Y285F	YFL047W	RGD2	1.00767	0.012	1.02414	0.037	-0.01793	0.012	0
YER070W	rnr1Y285F	YGR249W	MGA1	1.02516	0.022	1.04441	0.01	-0.01793	0.022	0
YER070W	rnr1Y285F	YJR137C	MET5	1.02002	0.074	1.032	0.029	-0.01792	0.074	0.0001
YER070W	rnr1Y285F	YKR051W	YKR051W	0.95917	0.012	0.97483	0.009	-0.01791	0.012	0
YER070W	rnr1Y285F	YPL144W	POC4	0.87136	0.018	0.88771	0.007	-0.01789	0.018	0
YER070W	rnr1Y285F	YMR306W	FKS3	0.98405	0.014	1.00975	0.028	-0.01788	0.014	0
YER070W	rnr1Y285F	YJL007C	YJL007C	0.95809	0.017	0.97743	0.017	-0.01787	0.017	0
YER070W	rnr1Y285F	YOL048C	RRT8	1.0113	0.019	1.02763	0.007	-0.01784	0.019	0
YER070W	rnr1Y285F	YBL094C	YBL094C	0.95491	0.025	0.97319	0.034	-0.01781	0.025	0.00024
YER070W	rnr1Y285F	YKR064W	OAF3	0.98538	0.02	1.00575	0.014	-0.0178	0.02	0
YER070W	rnr1Y285F	YHR130C	YHR130C	0.99399	0.018	1.01589	0.023	-0.0178	0.018	0
YER070W	rnr1Y285F	YMR086W	SEG1	1.05381	0.012	1.07176	0.002	-0.01775	0.012	0
YER070W	rnr1Y285F	YGL251C	HFM1	1.04778	0.032	1.07382	0.031	-0.01773	0.032	1e-05
YER070W	rnr1Y285F	YIL139C	REV7	0.99106	0.017	1.00982	0.014	-0.01769	0.017	0
YER070W	rnr1Y285F	YJL134W	LCB3	1.0463	0.003	1.06525	0.003	-0.01767	0.003	0
YER070W	rnr1Y285F	YER179W	DMC1	0.98029	0.034	1.00217	0.013	-0.01765	0.034	1e-05
YER070W	rnr1Y285F	YGL259W	YPS5	1.01376	0.032	1.03651	0.029	-0.01765	0.032	1e-05
YER070W	rnr1Y285F	YDR395W	SXM1	1.05231	0.002	1.07208	0.007	-0.01761	0.002	0
YER070W	rnr1Y285F	YJL089W	SIP4	0.97196	0.018	0.9846	0.056	-0.01754	0.018	0.00011
YER070W	rnr1Y285F	YOL049W	GSH2	1.00368	0.012	1.01964	0.004	-0.01745	0.012	0
YER070W	rnr1Y285F	YIL074C	SER33	0.99277	0.015	1.00765	0.017	-0.01743	0.015	0
YER070W	rnr1Y285F	YLR018C	POM34	1.01921	0.013	1.03566	0.021	-0.01742	0.013	0
YER070W	rnr1Y285F	YDR179C	CSN9	1.03233	0.01	1.04551	0.01	-0.0174	0.01	3e-05
YER070W	rnr1Y285F	YHR113W	APE4	0.98257	0.027	0.99917	0.009	-0.01735	0.027	1e-05
YER070W	rnr1Y285F	YOL106W	YOL106W	1.06651	0.004	1.08319	0.01	-0.01734	0.004	0
YER070W	rnr1Y285F	YGL035C	MIG1	0.98697	0.002	1.00149	0.017	-0.0173	0.002	0
YER070W	rnr1Y285F	YLR019W	PSR2	1.05955	0.015	1.07206	0.009	-0.0173	0.015	0
YER070W	rnr1Y285F	YAR014C	BUD14	0.97054	0.018	0.98433	0.026	-0.01727	0.018	0
YER070W	rnr1Y285F	YPR093C	ASR1	0.98215	0.05	0.99717	0.013	-0.01725	0.05	4e-05
YER070W	rnr1Y285F	YBR230C	OM14	1.02926	0.007	1.04568	0.013	-0.01725	0.007	1e-05
YER070W	rnr1Y285F	YPL149W	ATG5	1.03115	0.015	1.04488	0.017	-0.01722	0.015	0
YER070W	rnr1Y285F	YDL211C	YDL211C	1.033	0.043	1.05117	0.005	-0.0172	0.043	2e-05
YER070W	rnr1Y285F	YOR195W	SLK19	1.01671	0.035	1.03199	0.013	-0.0172	0.035	1e-05
YER070W	rnr1Y285F	YJL067W	YJL067W	1.01637	0.01	1.0321	0.01	-0.01713	0.01	0
YER070W	rnr1Y285F	YGR275W	RTT102	0.94869	0.129	0.97088	0.08	-0.01712	0.129	0.00068
YER070W	rnr1Y285F	YJL192C	SOP4	1.02298	0.004	1.03934	0.004	-0.01711	0.004	1e-05
YER070W	rnr1Y285F	YPR012W	YPR012W	0.99697	0.002	1.00987	0.024	-0.0171	0.002	0
YER070W	rnr1Y285F	YPL072W	UBP16	1.01341	0.014	1.03566	0.027	-0.01708	0.014	0
YER070W	rnr1Y285F	YGL202W	ARO8	0.9446	0.085	0.95237	0.041	-0.01703	0.085	0.0002
YER070W	rnr1Y285F	YAL055W	PEX22	0.92177	0.023	0.93754	0.001	-0.017	0.023	0
YER070W	rnr1Y285F	YGL028C	SCW11	0.99122	0.021	1.0091	0.017	-0.01698	0.021	0
YER070W	rnr1Y285F	YHR181W	SVP26	1.01872	0.053	1.03761	0.045	-0.01694	0.053	4e-05
YER070W	rnr1Y285F	YJL181W	YJL181W	1.00321	0.028	1.02104	0.022	-0.0169	0.028	1e-05
YER070W	rnr1Y285F	YOL070C	NBA1	1.06142	0.051	1.07516	0.023	-0.0169	0.051	3e-05
YER070W	rnr1Y285F	YIL086C	YIL086C	0.99801	0.005	1.01495	0.003	-0.01686	0.005	1e-05
YER070W	rnr1Y285F	YIL005W	EPS1	1.00351	0.001	1.02225	0.006	-0.01685	0.001	0
YER070W	rnr1Y285F	YGR108W	CLB1	1.00818	0.001	1.02408	0.019	-0.01684	0.001	0
YER070W	rnr1Y285F	YOL089C	HAL9	0.98194	0.037	0.99652	0.012	-0.01682	0.037	2e-05
YER070W	rnr1Y285F	YDL173W	PAR32	0.91106	0.007	0.93358	0.012	-0.0168	0.007	0
YER070W	rnr1Y285F	YDR305C	HNT2	0.96447	0.018	0.98073	0.028	-0.01679	0.018	0.00012
YER070W	rnr1Y285F	YLR227C	ADY4	1.03361	0.084	1.05358	0.017	-0.01679	0.084	0.00015
YER070W	rnr1Y285F	YKL005C	BYE1	1.02819	0.029	1.04341	0.012	-0.01677	0.029	1e-05
YER070W	rnr1Y285F	YCL001W-A	YCL001W-A	1.03083	0.008	1.05018	0.015	-0.01677	0.008	0
YER070W	rnr1Y285F	YLR199C	PBA1	1.006	0.124	0.98457	0.129	-0.01674	0.124	0.00051
YER070W	rnr1Y285F	YDL149W	ATG9	0.92419	0.037	0.9369	0.029	-0.01673	0.037	2e-05
YER070W	rnr1Y285F	YLR395C	COX8	1.07956	0.009	1.09449	0.013	-0.01669	0.009	0
YER070W	rnr1Y285F	YDL172C	YDL172C	0.95424	0.027	0.97067	0.018	-0.01668	0.027	1e-05
YER070W	rnr1Y285F	YGR087C	PDC6	1.02386	0.014	1.04016	0.007	-0.01665	0.014	0
YER070W	rnr1Y285F	YDR275W	BSC2	1.00903	0.015	1.02314	0.007	-0.01662	0.015	0
YER070W	rnr1Y285F	YLR043C	TRX1	1.02891	0.019	1.04641	0.021	-0.01657	0.019	0
YER070W	rnr1Y285F	YJL178C	ATG27	1.00633	0.036	1.01794	0.021	-0.01652	0.036	1e-05
YER070W	rnr1Y285F	YOR061W	CKA2	0.92943	0.022	0.94216	0.013	-0.01652	0.022	0
YER070W	rnr1Y285F	YLR247C	IRC20	1.00558	0.01	1.02571	0.018	-0.01649	0.01	0
YER070W	rnr1Y285F	YOL152W	FRE7	1.01979	0.025	1.03226	0.007	-0.01644	0.025	0.00021
YER070W	rnr1Y285F	YBR284W	YBR284W	0.99518	0.026	1.00969	0.007	-0.01636	0.026	0
YER070W	rnr1Y285F	YIR027C	DAL1	0.98306	0.003	0.99584	0.021	-0.01635	0.003	0
YER070W	rnr1Y285F	YLR364W	GRX8	1.03817	0.008	1.04811	0.03	-0.01633	0.008	0
YER070W	rnr1Y285F	YBR064W	YBR064W	1.03426	0.01	1.05475	0.025	-0.01631	0.01	0
YER070W	rnr1Y285F	YLR064W	PER33	1.07865	0.025	1.09101	0.035	-0.01619	0.025	0
YER070W	rnr1Y285F	YJL022W	YJL022W	1.02958	0.016	1.04694	0.006	-0.01615	0.016	0
YER070W	rnr1Y285F	YIL130W	ASG1	0.98809	0.018	1.00618	0.016	-0.01614	0.018	0
YER070W	rnr1Y285F	YCR001W	YCR001W	1.05286	0.005	1.07138	0.011	-0.01613	0.005	1e-05
YER070W	rnr1Y285F	YBR194W	AIM4	0.92524	0.024	0.9424	0.015	-0.01608	0.024	0
YER070W	rnr1Y285F	YMR055C	BUB2	0.9924	0.004	1.01253	0.022	-0.01604	0.004	1e-05
YER070W	rnr1Y285F	YOR255W	OSW1	1.01501	0.013	1.02923	0.005	-0.01599	0.013	6e-05
YER070W	rnr1Y285F	YGR058W	PEF1	0.93695	0.023	0.95002	0.013	-0.01592	0.023	0
YER070W	rnr1Y285F	YML056C	IMD4	0.96985	0.004	0.98406	0.002	-0.01591	0.004	1e-05
YER070W	rnr1Y285F	YMR313C	TGL3	0.99683	0.019	1.01158	0.013	-0.0159	0.019	0
YER070W	rnr1Y285F	YER164W	CHD1	0.88823	0.029	0.90522	0.027	-0.01584	0.029	1e-05
YER070W	rnr1Y285F	YFR041C	ERJ5	1.00126	0.011	1.01922	0.011	-0.01583	0.011	0
YER070W	rnr1Y285F	YNL063W	MTQ1	0.97797	0.019	0.99633	0.017	-0.01581	0.019	0
YER070W	rnr1Y285F	YBL036C	YBL036C	0.99316	0.005	1.00482	0.024	-0.0158	0.005	1e-05
YER070W	rnr1Y285F	YCR075C	ERS1	1.03311	0.025	1.05023	0.031	-0.01577	0.025	0
YER070W	rnr1Y285F	YDR403W	DIT1	0.95333	0.028	0.9667	0.02	-0.01576	0.028	1e-05
YER070W	rnr1Y285F	YLR121C	YPS3	1.00262	0.02	1.01956	0.023	-0.01574	0.02	0
YER070W	rnr1Y285F	YLR436C	ECM30	0.90418	0.002	0.92081	0.011	-0.01571	0.002	0
YER070W	rnr1Y285F	YBL005W	PDR3	1.05611	0.014	1.0711	0.031	-0.01571	0.014	0
YER070W	rnr1Y285F	YDR402C	DIT2	1.04586	0.01	1.06619	0.023	-0.0157	0.01	0
YER070W	rnr1Y285F	YDL119C	YDL119C	1.01308	0.01	1.02587	0.014	-0.01568	0.01	0
YER070W	rnr1Y285F	YAR050W	FLO1	1.02795	0.022	1.04581	0.016	-0.01559	0.022	0
YER070W	rnr1Y285F	YDL183C	YDL183C	0.88266	0.015	0.89837	0.022	-0.01558	0.015	0
YER070W	rnr1Y285F	YLL047W	YLL047W	0.98727	0.027	1.0028	0.029	-0.01557	0.027	1e-05
YER070W	rnr1Y285F	YGL209W	MIG2	1.0118	0.041	1.02189	0.022	-0.01556	0.041	2e-05
YER070W	rnr1Y285F	YDL125C	HNT1	0.98097	0.016	0.99523	0.007	-0.01555	0.016	0
YER070W	rnr1Y285F	YML101C	CUE4	1.04114	0.005	1.05147	0.015	-0.01554	0.005	0
YER070W	rnr1Y285F	YLR266C	PDR8	1.02212	0.044	1.04067	0.022	-0.01552	0.044	2e-05
YER070W	rnr1Y285F	YIR016W	YIR016W	0.96919	0.008	0.97914	0.022	-0.0155	0.008	2e-05
YER070W	rnr1Y285F	YKL067W	YNK1	1.00341	0.008	1.01831	0.018	-0.01545	0.008	0
YER070W	rnr1Y285F	YFR008W	FAR7	0.91605	0.008	0.93208	0.014	-0.01543	0.008	0
YER070W	rnr1Y285F	YML057W	CMP2	0.98615	0.005	1.00566	0.019	-0.01541	0.005	1e-05
YER070W	rnr1Y285F	YKL070W	YKL070W	0.99217	0.032	1.00873	0.002	-0.0154	0.032	1e-05
YER070W	rnr1Y285F	YJR008W	MHO1	1.07307	0.018	1.0888	0.01	-0.01539	0.018	0
YER070W	rnr1Y285F	YOL126C	MDH2	1.00663	0.011	1.02394	0.026	-0.01538	0.011	0
YER070W	rnr1Y285F	YLL059C	YLL059C	1.0028	0.019	1.02261	0.021	-0.01537	0.019	0
YER070W	rnr1Y285F	YCR015C	YCR015C	1.02275	0.036	1.03979	0.009	-0.01536	0.036	1e-05
YER070W	rnr1Y285F	YKL217W	JEN1	0.9466	0.006	0.96523	0.034	-0.01534	0.006	0
YER070W	rnr1Y285F	YKR028W	SAP190	0.97453	0.012	0.99091	0.017	-0.01534	0.012	0
YER070W	rnr1Y285F	YOR049C	RSB1	0.95455	0.005	0.97297	0.029	-0.01534	0.005	1e-05
YER070W	rnr1Y285F	YDL171C	GLT1	0.99638	0.034	1.00898	0.035	-0.01533	0.034	1e-05
YER070W	rnr1Y285F	YJR090C	GRR1	0.1319	0.077	0.15251	0.013	-0.01531	0.077	0.04125
YER070W	rnr1Y285F	YLR108C	YLR108C	1.01424	0.027	1.02515	0.018	-0.01527	0.027	1e-05
YER070W	rnr1Y285F	YNL116W	DMA2	1.0307	0.007	1.05043	0.007	-0.01526	0.007	2e-05
YER070W	rnr1Y285F	YHR105W	YPT35	0.97706	0.018	0.99057	0.014	-0.01519	0.018	0
YER070W	rnr1Y285F	YPL081W	RPS9A	1.00879	0.034	1.02533	0.009	-0.01517	0.034	1e-05
YER070W	rnr1Y285F	YDR051C	DET1	1.02805	0.013	1.04175	0.009	-0.01516	0.013	0
YER070W	rnr1Y285F	YOR105W	YOR105W	0.9915	0.014	1.00235	0.02	-0.01515	0.014	0
YER070W	rnr1Y285F	YOL153C	YOL153C	0.96273	0.036	0.98304	0.026	-0.01514	0.036	1e-05
YER070W	rnr1Y285F	YJR096W	YJR096W	1.03649	0.019	1.04839	0.007	-0.01513	0.019	0
YER070W	rnr1Y285F	YPL225W	YPL225W	1.0088	0.024	1.02448	0.018	-0.01513	0.024	0
YER070W	rnr1Y285F	YDR179W-A	YDR179W-A	0.90317	0.052	0.91559	0.074	-0.01509	0.052	5e-05
YER070W	rnr1Y285F	YGR016W	YGR016W	0.99705	0.012	1.0097	0.026	-0.01506	0.012	0
YER070W	rnr1Y285F	YGL006W	PMC1	1.03389	0.073	1.05914	0.036	-0.01503	0.073	0.0001
YER070W	rnr1Y285F	YBR066C	NRG2	0.97588	0.025	0.9928	0.014	-0.01501	0.025	0
YER070W	rnr1Y285F	YJR094C	IME1	1.05146	0.038	1.07216	0.03	-0.01496	0.038	1e-05
YER070W	rnr1Y285F	YMR304C-A	YMR304C-A	0.9683	0.02	0.99669	0.046	-0.01496	0.02	0
YER070W	rnr1Y285F	YOR344C	TYE7	1.0096	0.024	1.02166	0.017	-0.0149	0.024	0
YER070W	rnr1Y285F	YFL023W	BUD27	0.73227	0.007	0.74431	0.021	-0.01489	0.007	3e-05
YER070W	rnr1Y285F	YOL108C	INO4	0.2518	0.021	0.26662	0.024	-0.01488	0.021	0.00017
YER070W	rnr1Y285F	YOL093W	TRM10	0.98191	0.008	0.99571	0.002	-0.01486	0.008	2e-05
YER070W	rnr1Y285F	YKR092C	SRP40	0.86306	0.012	0.87719	0.023	-0.01478	0.012	0
YER070W	rnr1Y285F	YBR281C	DUG2	0.97494	0.006	0.98807	0.015	-0.01477	0.006	1e-05
YER070W	rnr1Y285F	YLL060C	GTT2	1.01819	0.03	1.03199	0.006	-0.01471	0.03	1e-05
YER070W	rnr1Y285F	YBL088C	TEL1	0.99125	0.029	0.99433	0.048	-0.01469	0.029	1e-05
YER070W	rnr1Y285F	YPL161C	BEM4	0.84068	0.008	0.84919	0.034	-0.01468	0.008	3e-05
YER070W	rnr1Y285F	YLR149C	YLR149C	1.03993	0.011	1.05728	0.015	-0.01461	0.011	0
YER070W	rnr1Y285F	YPR160W	GPH1	1.01771	0.019	1.03052	0.027	-0.0146	0.019	0
YER070W	rnr1Y285F	YNL078W	NIS1	1.07228	0.004	1.08745	0.027	-0.01459	0.004	1e-05
YER070W	rnr1Y285F	YBR208C	DUR1	1.01417	0.01	1.02565	0.016	-0.01458	0.01	0
YER070W	rnr1Y285F	YMR187C	YMR187C	0.9877	0.012	1.00358	0.018	-0.01456	0.012	0
YER070W	rnr1Y285F	YIL102C	YIL102C	1.02177	0.021	1.03419	0.024	-0.01448	0.021	0
YER070W	rnr1Y285F	YLR380W	CSR1	1.03808	0.027	1.03863	0.041	-0.01448	0.027	0
YER070W	rnr1Y285F	YKR014C	YPT52	1.03224	0.041	1.0504	0.01	-0.01446	0.041	2e-05
YER070W	rnr1Y285F	YJR120W	YJR120W	0.89409	0.119	0.88131	0.133	-0.01443	0.119	0.00064
YER070W	rnr1Y285F	YOR225W	YOR225W	0.96305	0.005	0.97555	0.009	-0.0144	0.005	1e-05
YER070W	rnr1Y285F	YBR258C	SHG1	0.98407	0.03	0.99769	0.038	-0.0144	0.03	1e-05
YER070W	rnr1Y285F	YCR061W	YCR061W	1.02063	0.021	1.0193	0.074	-0.01437	0.021	0.00014
YER070W	rnr1Y285F	YML117W-A	YML117W-A	1.03649	0.019	1.04965	0.001	-0.01436	0.019	0
YER070W	rnr1Y285F	YDL174C	DLD1	0.96719	0.02	0.98421	0.016	-0.01433	0.02	0
YER070W	rnr1Y285F	YLR054C	OSW2	1.00851	0.016	1.02302	0.015	-0.01432	0.016	0
YER070W	rnr1Y285F	YOR360C	PDE2	0.97687	0.003	0.99202	0.003	-0.01421	0.003	0
YER070W	rnr1Y285F	YFR017C	IGD1	1.00087	0.01	1.01399	0.01	-0.01414	0.01	0
YER070W	rnr1Y285F	YMR195W	ICY1	1.0539	0.006	1.06613	0.02	-0.01413	0.006	0
YER070W	rnr1Y285F	YHR116W	COX23	0.91045	0.017	0.9236	0.026	-0.01411	0.017	0
YER070W	rnr1Y285F	YBL011W	SCT1	0.95607	0.054	0.96534	0.024	-0.01411	0.054	5e-05
YER070W	rnr1Y285F	YOL017W	ESC8	0.98727	0.005	0.99981	0.008	-0.01408	0.005	1e-05
YER070W	rnr1Y285F	YOR067C	ALG8	0.93293	0.004	0.9421	0.02	-0.01407	0.004	1e-05
YER070W	rnr1Y285F	YFL041W	FET5	0.99388	0.009	1.00415	0.007	-0.01406	0.009	3e-05
YER070W	rnr1Y285F	YIL087C	AIM19	0.9805	0.005	0.99414	0.005	-0.01401	0.005	0
YER070W	rnr1Y285F	YKL211C	TRP3	1.00221	0.004	1.01638	0.035	-0.014	0.004	0
YER070W	rnr1Y285F	YJL164C	TPK1	0.84963	0.052	0.87085	0.03	-0.01399	0.052	6e-05
YER070W	rnr1Y285F	YGR247W	CPD1	0.97763	0.039	0.98996	0.023	-0.01396	0.039	2e-05
YER070W	rnr1Y285F	YJL105W	SET4	0.9883	0.019	1.00678	0.019	-0.01394	0.019	0
YER070W	rnr1Y285F	YLR341W	SPO77	0.99449	0.002	1.00882	0.016	-0.01394	0.002	0
YER070W	rnr1Y285F	YML076C	WAR1	0.98883	0.016	1.00033	0.007	-0.0139	0.016	0
YER070W	rnr1Y285F	YMR238W	DFG5	1.02947	0.094	1.04661	0.035	-0.01387	0.094	0.00021
YER070W	rnr1Y285F	YJR058C	APS2	0.98682	0.025	0.99357	0.029	-0.01383	0.025	0
YER070W	rnr1Y285F	YLR214W	FRE1	0.98758	0.023	0.99969	0.026	-0.01383	0.023	0
YER070W	rnr1Y285F	YPL267W	ACM1	0.91378	0.027	0.9308	0.042	-0.01381	0.027	1e-05
YER070W	rnr1Y285F	YHL046C	PAU13	0.99022	0.013	1.00176	0.021	-0.01373	0.013	0
YER070W	rnr1Y285F	YGR014W	MSB2	1.00908	0.027	1.02699	0.015	-0.0137	0.027	1e-05
YER070W	rnr1Y285F	YDR011W	SNQ2	0.99916	0.02	0.99921	0.048	-0.01364	0.02	0
YER070W	rnr1Y285F	YDL011C	YDL011C	0.97485	0.045	0.99189	0.01	-0.01361	0.045	3e-05
YER070W	rnr1Y285F	YOR113W	AZF1	0.97945	0.065	0.99274	0.001	-0.01356	0.065	8e-05
YER070W	rnr1Y285F	YDR469W	SDC1	0.83714	0.029	0.85414	0.023	-0.0135	0.029	1e-05
YER070W	rnr1Y285F	YCL006C	YCL006C	0.99296	0.02	1.00322	0.026	-0.01348	0.02	0
YER070W	rnr1Y285F	YOR086C	TCB1	0.9663	0.052	0.98121	0.063	-0.01348	0.052	4e-05
YER070W	rnr1Y285F	YIL041W	GVP36	0.96634	0.016	0.98072	0.008	-0.01346	0.016	0
YER070W	rnr1Y285F	YNR024W	MPP6	1.02056	0.003	1.03073	0.009	-0.01338	0.003	0
YER070W	rnr1Y285F	YGR266W	YGR266W	1.04736	0.026	1.06804	0.021	-0.01336	0.026	0
YER070W	rnr1Y285F	YLR311C	YLR311C	1.01088	0.017	1.02569	0.008	-0.01334	0.017	0
YER070W	rnr1Y285F	YDR043C	NRG1	0.92841	0.021	0.93789	0.03	-0.01333	0.021	0
YER070W	rnr1Y285F	YML072C	TCB3	0.99213	0.015	1.00577	0.017	-0.0133	0.015	0
YER070W	rnr1Y285F	YCR016W	YCR016W	1.00352	0.02	1.01879	0.003	-0.01329	0.02	0
YER070W	rnr1Y285F	YBR090C	YBR090C	1.04356	0.016	1.05769	0.008	-0.01329	0.016	0
YER070W	rnr1Y285F	YLR287C	YLR287C	1.07805	0.031	1.0905	0.004	-0.01325	0.031	1e-05
YER070W	rnr1Y285F	YKL132C	RMA1	1.04961	0.017	1.06207	0.013	-0.01324	0.017	0
YER070W	rnr1Y285F	YOL109W	ZEO1	1.02283	0.046	1.03868	0.01	-0.01322	0.046	2e-05
YER070W	rnr1Y285F	YLR095C	IOC2	0.95062	0.02	0.95187	0.026	-0.01321	0.02	0
YER070W	rnr1Y285F	YBR288C	APM3	0.98833	0.025	0.99873	0.015	-0.0132	0.025	0
YER070W	rnr1Y285F	YOR242C	SSP2	0.96392	0.033	0.97548	0.008	-0.01316	0.033	1e-05
YER070W	rnr1Y285F	YGL262W	YGL262W	0.95112	0.011	0.96775	0.016	-0.01311	0.011	5e-05
YER070W	rnr1Y285F	YDL169C	UGX2	0.9947	0.003	1.00818	0.009	-0.01303	0.003	0
YER070W	rnr1Y285F	YKL039W	PTM1	0.98434	0.005	0.98871	0.047	-0.01302	0.005	1e-05
YER070W	rnr1Y285F	YGL208W	SIP2	0.99156	0.006	1.00595	0.028	-0.013	0.006	1e-05
YER070W	rnr1Y285F	YMR295C	YMR295C	1.04424	0.008	1.05978	0.045	-0.01299	0.008	2e-05
YER070W	rnr1Y285F	YJR082C	EAF6	0.93954	0.004	0.95572	0.012	-0.01298	0.004	1e-05
YER070W	rnr1Y285F	YOL136C	PFK27	1.00721	0.016	1.01258	0.014	-0.01293	0.016	0
YER070W	rnr1Y285F	YOR121C	YOR121C	0.97735	0.033	0.99291	0.017	-0.01293	0.033	1e-05
YER070W	rnr1Y285F	YBR239C	ERT1	1.05061	0.012	1.06557	0.007	-0.01287	0.012	0
YER070W	rnr1Y285F	YLR435W	TSR2	0.70318	0.011	0.72163	0.022	-0.01285	0.011	0
YER070W	rnr1Y285F	YDR258C	HSP78	1.04033	0.009	1.04826	0.025	-0.01283	0.009	0
YER070W	rnr1Y285F	YKL174C	TPO5	1.0106	0.028	1.02605	0.026	-0.01283	0.028	1e-05
YER070W	rnr1Y285F	YBR139W	YBR139W	1.01057	0.045	1.02092	0.036	-0.01279	0.045	2e-05
YER070W	rnr1Y285F	YLR122C	YLR122C	0.98331	0.021	0.99836	0.023	-0.01277	0.021	0
YER070W	rnr1Y285F	YLR039C	RIC1	0.59115	0.015	0.6042	0.001	-0.01275	0.015	0
YER070W	rnr1Y285F	YIR024C	YIR024C	0.99107	0.026	1.0024	0.003	-0.01274	0.026	1e-05
YER070W	rnr1Y285F	YLL055W	YCT1	1.03609	0.022	1.01346	0.116	-0.01274	0.022	0
YER070W	rnr1Y285F	YNL056W	OCA2	1.00382	0.012	1.01762	0.009	-0.01271	0.012	0
YER070W	rnr1Y285F	YBR293W	VBA2	0.96922	0.034	0.98212	0.001	-0.01269	0.034	1e-05
YER070W	rnr1Y285F	YJL073W	JEM1	0.93841	0.106	0.97208	0.099	-0.01267	0.106	0.00039
YER070W	rnr1Y285F	YGL034C	YGL034C	1.02519	0.011	1.03642	0.033	-0.01265	0.011	0
YER070W	rnr1Y285F	YKR061W	KTR2	1.00568	0.014	1.01827	0.003	-0.01264	0.014	0
YER070W	rnr1Y285F	YBR074W	YBR074W	0.99661	0.003	1.00873	0.008	-0.01264	0.003	0
YER070W	rnr1Y285F	YBR182C	SMP1	0.97481	0.018	0.98785	0.005	-0.01262	0.018	0
YER070W	rnr1Y285F	YNR032W	PPG1	0.97856	0.03	0.99035	0.026	-0.01261	0.03	1e-05
YER070W	rnr1Y285F	YGL260W	YGL260W	1.01219	0.049	1.02755	0.007	-0.01251	0.049	3e-05
YER070W	rnr1Y285F	YBR084W	MIS1	0.94319	0.019	0.95488	0.007	-0.0125	0.019	0
YER070W	rnr1Y285F	YGR054W	YGR054W	1.05217	0.048	1.06542	0.014	-0.01249	0.048	3e-05
YER070W	rnr1Y285F	YOR064C	YNG1	1.03388	0.015	1.04681	0.012	-0.01249	0.015	0
YER070W	rnr1Y285F	YLR398C	SKI2	0.99983	0.014	1.00006	0.073	-0.01245	0.014	0
YER070W	rnr1Y285F	YLR114C	AVL9	0.92339	0.004	0.93091	0.046	-0.01243	0.004	1e-05
YER070W	rnr1Y285F	YAL040C	CLN3	1.01979	0.009	1.03019	0.003	-0.01242	0.009	0
YER070W	rnr1Y285F	YBR083W	TEC1	1.02124	0.01	1.03138	0.003	-0.01231	0.01	0
YER070W	rnr1Y285F	YGL121C	GPG1	1.03142	0	1.04481	0.017	-0.01231	0	0
YER070W	rnr1Y285F	YOR171C	LCB4	1.03207	0.021	1.04321	0.02	-0.01229	0.021	0
YER070W	rnr1Y285F	YBL102W	SFT2	0.95786	0.021	0.96795	0.018	-0.01228	0.021	0
YER070W	rnr1Y285F	YCR030C	SYP1	1.0338	0.048	1.0459	0.008	-0.01227	0.048	3e-05
YER070W	rnr1Y285F	YDR291W	HRQ1	1.06015	0.037	1.07538	0.053	-0.01226	0.037	1e-05
YER070W	rnr1Y285F	YML058C-A	YML058C-A	1.04488	0.025	1.06353	0.03	-0.01222	0.025	0
YER070W	rnr1Y285F	YGL165C	YGL165C	1.0294	0.015	1.03979	0.014	-0.01222	0.015	0
YER070W	rnr1Y285F	YDR540C	IRC4	0.9932	0.034	1.00636	0.018	-0.01221	0.034	1e-05
YER070W	rnr1Y285F	YPR058W	YMC1	1.02066	0.006	1.03949	0.026	-0.01218	0.006	1e-05
YER070W	rnr1Y285F	YLL049W	LDB18	1.00563	0.04	1.02035	0.028	-0.01218	0.04	2e-05
YER070W	rnr1Y285F	YLR366W	YLR366W	0.94711	0.01	0.9575	0.017	-0.01217	0.01	0
YER070W	rnr1Y285F	YGR137W	YGR137W	1.00612	0.02	1.02244	0.016	-0.01215	0.02	0
YER070W	rnr1Y285F	YDR076W	RAD55	0.79806	0.01	0.81032	0.001	-0.01214	0.01	0
YER070W	rnr1Y285F	YPL021W	ECM23	1.0513	0.015	1.06343	0.009	-0.01212	0.015	0
YER070W	rnr1Y285F	YLR258W	GSY2	1.06437	0.028	1.07907	0.009	-0.01208	0.028	0
YER070W	rnr1Y285F	YOR025W	HST3	1.01298	0.034	1.0265	0.021	-0.01205	0.034	1e-05
YER070W	rnr1Y285F	YBR151W	APD1	1.03083	0.002	1.04246	0.004	-0.01204	0.002	0
YER070W	rnr1Y285F	YPL138C	SPP1	0.95889	0.02	0.97371	0.024	-0.01197	0.02	0
YER070W	rnr1Y285F	YBR297W	MAL33	1.01599	0.02	1.0271	0.012	-0.01196	0.02	0
YER070W	rnr1Y285F	YPL253C	VIK1	1.07566	0.023	1.08384	0.008	-0.01191	0.023	0
YER070W	rnr1Y285F	YJL158C	CIS3	1.03075	0.036	1.04068	0.03	-0.01189	0.036	1e-05
YER070W	rnr1Y285F	YGR243W	FMP43	1.09364	0.033	1.10777	0.027	-0.01188	0.033	1e-05
YER070W	rnr1Y285F	YDL144C	YDL144C	1.04632	0.001	1.05225	0.022	-0.01184	0.001	0
YER070W	rnr1Y285F	YGR187C	HGH1	0.98787	0.003	1.00191	0.004	-0.01182	0.003	0
YER070W	rnr1Y285F	YOL019W	YOL019W	1.00033	0.014	1.01184	0.041	-0.01179	0.014	0
YER070W	rnr1Y285F	YBR214W	SDS24	1.02147	0.032	1.03428	0.04	-0.01176	0.032	1e-05
YER070W	rnr1Y285F	YCL034W	LSB5	0.97888	0.02	0.99164	0.021	-0.01173	0.02	0
YER070W	rnr1Y285F	YLR065C	ENV10	0.9595	0.031	0.97255	0.017	-0.01173	0.031	1e-05
YER070W	rnr1Y285F	YBR056W	YBR056W	0.98936	0.007	0.99967	0.002	-0.01169	0.007	2e-05
YER070W	rnr1Y285F	YBR169C	SSE2	1.00375	0.008	1.01241	0.012	-0.01161	0.008	0
YER070W	rnr1Y285F	YJL161W	FMP33	1.01013	0.005	1.02163	0.011	-0.01159	0.005	0
YER070W	rnr1Y285F	YOR209C	NPT1	0.98348	0.015	0.99429	0.007	-0.01158	0.015	0
YER070W	rnr1Y285F	YDL078C	MDH3	1.02055	0.07	1.03918	0.033	-0.01158	0.07	9e-05
[truncated: 2,975 more rows]

## Sheet: Table S6. rnr1D57N x DMA
Table S6. rnr1D57N x deletion mutant array raw SGA data
[truncated: 4,116 more rows]

[truncated: 4 more sheets: Table S7. rnr1Y285A x TSA, Table S8. rnrY285F x TSA, Table S9. rnr1D57N x TSA, Table S10. Hits and overlaps]
