# Supplementary material for: Complex mutation profiles in mismatch repair and ribonucleotide reductase mutants reveal novel repair substrate specificity of MutS homolog (MSH) complexes
Source: Oxford University Press journal article supplement (doi:10.1093/genetics/iyac092), 2022-06-10
Supplement: iyac092_tables_s13_s23.xlsx [file iyac092_tables_s13_s23.xlsx]

## Sheet: ST13. cosine bio. replicates
Table S13. Cosine scores among biological replicates
	msh2-Rep1	msh2-Rep2	msh2-Rep3	msh2-Rep4	msh3-Rep1	msh3-Rep2	msh3-Rep3	msh3-Rep4	msh3-Rep5	msh3-Rep6	msh6-Rep1	msh6-Rep2	msh6-Rep3	msh6-Rep4	rnr1D57N_msh2-Rep1	rnr1D57N_msh2-Rep2	rnr1D57N_msh2-Rep3	rnr1D57N_msh2-Rep4	rnr1D57N_msh3-Rep1	rnr1D57N_msh3-Rep2	rnr1D57N_msh3-Rep3	rnr1D57N_msh3-Rep4	rnr1D57N_msh6-Rep1	rnr1D57N_msh6-Rep2	rnr1D57N_msh6-Rep3	rnr1D57N_msh6-Rep4	rnr1D57N-Rep1	rnr1D57N-Rep2	rnr1D57N-Rep3	rnr1D57N-Rep4	rnr1D57N-Rep5	rnr1D57N-Rep6	rnr1D57N-Rep7	rnr1Y285A_msh2-Rep1	rnr1Y285A_msh2-Rep2	rnr1Y285A_msh2-Rep3	rnr1Y285A_msh2-Rep4	rnr1Y285A_msh2-Rep5	rnr1Y285A_msh2-Rep6	rnr1Y285A_msh2-Rep7	rnr1Y285A_msh3-Rep1	rnr1Y285A_msh3-Rep2	rnr1Y285A_msh3-Rep3	rnr1Y285A_msh3-Rep4	rnr1Y285A_msh6-Rep1	rnr1Y285A_msh6-Rep2	rnr1Y285A_msh6-Rep3	rnr1Y285A_msh6-Rep4	rnr1Y285A_msh6-Rep5
msh2-Rep1	1	0.431557	0.428527	0.37977	0.261092	0.309012	0.27074	0.211268	0.23334	0.238062	0.390248	0.40858	0.407277	0.313561	0.467641	0.456327	0.439109	0.47767	0.347522	0.300235	0.211922	0.201486	0.363408	0.315474	0.353589	0.347161	0.258694	0.271264	0.217483	0.271264	0.218165	0.191837	0.156032	0.385598	0.249331	0.42059	0.399714	0.289337	0.330499	0.272769	0.225176	0.288782	0.274551	0.253637	0.335872	0.345811	0.351264	0.208353	0.237356
msh2-Rep2	0.431557	1	0.496822	0.490909	0.315152	0.236707	0.235671	0.20499	0.268112	0.266524	0.472735	0.494942	0.471597	0.494942	0.499622	0.484863	0.518182	0.477705	0.306541	0.306645	0.18731	0.231511	0.468842	0.459928	0.448844	0.409123	0.3114	0.246753	0.244339	0.272727	0.214865	0.212261	0.217314	0.43383	0.346172	0.452791	0.408248	0.356545	0.356309	0.348241	0.258732	0.265453	0.272166	0.254071	0.381488	0.432664	0.436083	0.297923	0.343434
msh2-Rep3	0.428527	0.496822	1	0.48795	0.299276	0.215987	0.26311	0.220054	0.231852	0.225877	0.492551	0.476621	0.436158	0.460994	0.485741	0.484182	0.478191	0.447347	0.329069	0.267459	0.18767	0.26036	0.471842	0.493728	0.415371	0.472129	0.31909	0.223063	0.226528	0.264887	0.269098	0.122694	0.209956	0.346807	0.281912	0.401939	0.40837	0.362058	0.332166	0.274145	0.169734	0.189974	0.146083	0.192524	0.342857	0.341236	0.348608	0.251285	0.29277
msh2-Rep4	0.37977	0.490909	0.48795	1	0.28	0.286416	0.279977	0.237356	0.278539	0.277746	0.428243	0.432346	0.391063	0.416333	0.456259	0.508542	0.54	0.503115	0.337195	0.326769	0.178569	0.218282	0.451261	0.463046	0.400091	0.416283	0.32697	0.2	0.256556	0.242857	0.223221	0.197566	0.179284	0.375678	0.302005	0.4406	0.408248	0.328599	0.350683	0.33199	0.173925	0.275776	0.204124	0.213719	0.341565	0.349663	0.316392	0.257491	0.344444
msh3-Rep1	0.261092	0.315152	0.299276	0.28	1	0.260378	0.324912	0.276916	0.365924	0.308607	0.341575	0.341607	0.303273	0.282893	0.311086	0.281145	0.286667	0.268328	0.378605	0.316228	0.21062	0.266789	0.300841	0.291548	0.300777	0.232518	0.32697	0.219048	0.195471	0.209524	0.21009	0.143684	0.223109	0.257221	0.166321	0.274577	0.292578	0.254399	0.247541	0.198627	0.189737	0.194666	0.226805	0.197279	0.26024	0.207208	0.244949	0.179463	0.17037
msh3-Rep2	0.309012	0.236707	0.215987	0.286416	0.260378	1	0.337499	0.27811	0.21331	0.301329	0.258851	0.229316	0.270145	0.187622	0.350999	0.322959	0.221321	0.363889	0.33502	0.329355	0.232477	0.221028	0.241291	0.212109	0.288143	0.278301	0.263515	0.260378	0.286292	0.223181	0.205136	0.187061	0.155606	0.317248	0.22223	0.299276	0.292322	0.207	0.187991	0.221648	0.30877	0.38015	0.283463	0.385253	0.266808	0.278191	0.212598	0.137137	0.15912
msh3-Rep3	0.27074	0.235671	0.26311	0.279977	0.324912	0.337499	1	0.319965	0.339802	0.32001	0.293401	0.249068	0.264825	0.224161	0.247312	0.270098	0.269607	0.26665	0.358857	0.240469	0.256385	0.314372	0.25068	0.231186	0.255986	0.233332	0.250252	0.118509	0.202694	0.237018	0.204238	0.093121	0.198303	0.252688	0.149774	0.238373	0.243417	0.208842	0.224602	0.167715	0.180352	0.235502	0.211667	0.204569	0.172033	0.141005	0.211667	0.121366	0.161304
msh3-Rep4	0.211268	0.20499	0.220054	0.237356	0.276916	0.27811	0.319965	1	0.31112	0.329624	0.235964	0.180535	0.179959	0.199539	0.209208	0.250244	0.225489	0.225567	0.273806	0.262705	0.260827	0.259053	0.191267	0.213708	0.151538	0.186933	0.20326	0.101724	0.115991	0.16954	0.124666	0.0213152	0.198587	0.253049	0.140249	0.261448	0.254363	0.251597	0.244814	0.202051	0.243941	0.231026	0.209951	0.214616	0.185309	0.126797	0.193801	0.152793	0.145051
msh3-Rep5	0.23334	0.268112	0.231852	0.278539	0.365924	0.21331	0.339802	0.31112	1	0.303385	0.263123	0.255805	0.268065	0.229569	0.263346	0.264194	0.270347	0.274779	0.305319	0.241793	0.213807	0.248366	0.250859	0.25992	0.244082	0.202776	0.242353	0.187253	0.190162	0.198956	0.236655	0.176566	0.264376	0.274495	0.172113	0.274639	0.250838	0.208412	0.261942	0.209213	0.168392	0.186056	0.178373	0.215489	0.183882	0.167099	0.234115	0.163003	0.191154
msh3-Rep6	0.238062	0.266524	0.225877	0.277746	0.308607	0.301329	0.32001	0.329624	0.303385	1	0.212398	0.234729	0.209351	0.210021	0.288009	0.229668	0.216025	0.293278	0.328613	0.22771	0.254342	0.243256	0.149209	0.158777	0.210163	0.243047	0.228237	0.154303	0.188512	0.19839	0.141827	0.110855	0.258199	0.266341	0.243132	0.280812	0.220479	0.21263	0.190982	0.197028	0.243975	0.300376	0.31497	0.27904	0.19576	0.194834	0.267725	0.162539	0.154303
msh6-Rep1	0.390248	0.472735	0.492551	0.428243	0.341575	0.258851	0.293401	0.235964	0.263123	0.212398	1	0.557161	0.543178	0.557161	0.467856	0.464773	0.550598	0.444591	0.346075	0.298251	0.210084	0.157651	0.560768	0.511478	0.4687	0.481811	0.345293	0.273114	0.233563	0.251265	0.261073	0.164817	0.201083	0.450344	0.32132	0.490754	0.468293	0.36477	0.354936	0.351525	0.217643	0.235702	0.23935	0.226294	0.447774	0.445657	0.429268	0.375915	0.399353
msh6-Rep2	0.40858	0.494942	0.476621	0.432346	0.341607	0.229316	0.249068	0.180535	0.255805	0.234729	0.557161	1	0.543134	0.519231	0.44002	0.436952	0.488391	0.402815	0.305495	0.295382	0.164965	0.194184	0.51614	0.494312	0.47027	0.450396	0.349047	0.194441	0.234753	0.217317	0.231284	0.186939	0.220098	0.365817	0.273336	0.3681	0.384061	0.28855	0.313803	0.258989	0.16457	0.168845	0.174325	0.210599	0.375046	0.381049	0.367718	0.281124	0.302464
msh6-Rep3	0.407277	0.471597	0.436158	0.391063	0.303273	0.270145	0.264825	0.179959	0.268065	0.209351	0.543178	0.543134	1	0.555913	0.463443	0.455356	0.510776	0.437221	0.33993	0.277615	0.175401	0.174208	0.55308	0.506422	0.475564	0.502834	0.34172	0.285031	0.243755	0.262229	0.241026	0.172009	0.219396	0.429477	0.282944	0.412791	0.423563	0.321469	0.345729	0.292132	0.201902	0.23304	0.217212	0.249289	0.381638	0.41084	0.382836	0.280227	0.33697
msh6-Rep4	0.313561	0.494942	0.460994	0.416333	0.282893	0.187622	0.224161	0.199539	0.229569	0.210021	0.557161	0.519231	0.555913	1	0.381904	0.446883	0.51241	0.384912	0.220241	0.261624	0.131972	0.155347	0.541947	0.5561	0.47027	0.459404	0.336581	0.228755	0.195628	0.263068	0.231284	0.143799	0.248807	0.34143	0.231284	0.406444	0.375889	0.330984	0.330319	0.265805	0.139252	0.168845	0.130744	0.157949	0.351605	0.365496	0.343203	0.327978	0.35584
rnr1D57N_msh2-Rep1	0.467641	0.499622	0.485741	0.456259	0.311086	0.350999	0.247312	0.209208	0.263346	0.288009	0.467856	0.44002	0.463443	0.381904	1	0.630228	0.518476	0.556487	0.31285	0.306052	0.213654	0.251498	0.426156	0.382347	0.450183	0.466665	0.322906	0.296272	0.329378	0.281458	0.299549	0.260739	0.223091	0.463261	0.32678	0.486678	0.455084	0.32975	0.331556	0.353085	0.295122	0.370075	0.352778	0.357995	0.354186	0.382727	0.370417	0.254869	0.334129
rnr1D57N_msh2-Rep2	0.456327	0.484863	0.484182	0.508542	0.281145	0.322959	0.270098	0.250244	0.264194	0.229668	0.464773	0.436952	0.455356	0.446883	0.630228	1	0.57056	0.582435	0.29717	0.313786	0.20445	0.195538	0.43978	0.446707	0.454017	0.432605	0.270371	0.265789	0.242452	0.283508	0.276871	0.200496	0.20755	0.415596	0.293158	0.451454	0.417755	0.341839	0.35821	0.306198	0.274563	0.301816	0.270064	0.305868	0.290509	0.337325	0.3418	0.261309	0.316978
rnr1D57N_msh2-Rep3	0.439109	0.518182	0.478191	0.54	0.286667	0.221321	0.269607	0.225489	0.270347	0.216025	0.550598	0.488391	0.510776	0.51241	0.518476	0.57056	1	0.514296	0.301701	0.316228	0.178569	0.206155	0.515727	0.505921	0.485216	0.483788	0.334755	0.228571	0.232122	0.271429	0.236352	0.197566	0.203189	0.426445	0.302005	0.4406	0.449073	0.370999	0.371312	0.314965	0.205548	0.243332	0.217732	0.279478	0.380601	0.378801	0.357217	0.280899	0.311111
rnr1D57N_msh2-Rep4	0.47767	0.477705	0.447347	0.503115	0.268328	0.363889	0.26665	0.225567	0.274779	0.293278	0.444591	0.402815	0.437221	0.384912	0.556487	0.582435	0.514296	1	0.347233	0.247487	0.168931	0.203372	0.43245	0.383482	0.46635	0.465418	0.339451	0.303466	0.286838	0.271523	0.322971	0.261046	0.227172	0.499484	0.396374	0.535441	0.502079	0.367385	0.345949	0.371176	0.318198	0.417149	0.319505	0.385988	0.381881	0.434372	0.38797	0.274798	0.372678
rnr1D57N_msh3-Rep1	0.347522	0.306541	0.329069	0.337195	0.378605	0.33502	0.358857	0.273806	0.305319	0.328613	0.346075	0.305495	0.33993	0.220241	0.31285	0.29717	0.301701	0.347233	1	0.28996	0.231587	0.269019	0.307472	0.296752	0.324808	0.30949	0.303955	0.202824	0.195134	0.228177	0.186425	0.127499	0.212119	0.324351	0.186425	0.339973	0.316979	0.263367	0.292876	0.279486	0.210455	0.259107	0.217357	0.218821	0.268451	0.249944	0.289809	0.2181	0.216909
rnr1D57N_msh3-Rep2	0.300235	0.306645	0.267459	0.326769	0.316228	0.329355	0.240469	0.262705	0.241793	0.22771	0.298251	0.295382	0.277615	0.261624	0.306052	0.313786	0.316228	0.247487	0.28996	1	0.260623	0.178958	0.2888	0.289241	0.278164	0.237189	0.254389	0.19576	0.154533	0.271052	0.193773	0.132524	0.176383	0.27827	0.193773	0.242313	0.31199	0.223467	0.271803	0.188434	0.183333	0.170996	0.215166	0.225279	0.174877	0.17405	0.172133	0.135709	0.128834
rnr1D57N_msh3-Rep3	0.211922	0.18731	0.18767	0.178569	0.21062	0.232477	0.256385	0.260827	0.213807	0.254342	0.210084	0.164965	0.175401	0.131972	0.213654	0.20445	0.178569	0.168931	0.231587	0.260623	1	0.199889	0.177101	0.153121	0.116929	0.139088	0.160403	0.117738	0.117469	0.176606	0.144291	0.0986827	0.164177	0.209203	0.1984	0.210508	0.238328	0.160162	0.155844	0.152008	0.195468	0.200545	0.243001	0.248401	0.120645	0.120075	0.140193	0.096461	0.106836
rnr1D57N_msh3-Rep4	0.201486	0.231511	0.26036	0.218282	0.266789	0.221028	0.314372	0.259053	0.248366	0.243256	0.157651	0.194184	0.174208	0.155347	0.251498	0.195538	0.206155	0.203372	0.269019	0.178958	0.199889	1	0.195441	0.207973	0.165168	0.163724	0.188814	0.121268	0.162967	0.225212	0.175156	0.0435607	0.173931	0.160067	0.127386	0.197461	0.19803	0.128544	0.200125	0.123876	0.134219	0.17705	0.181527	0.239236	0.118345	0.0942286	0.0990148	0.0851599	0.0943194
rnr1D57N_msh6-Rep1	0.363408	0.468842	0.471842	0.451261	0.300841	0.241291	0.25068	0.191267	0.250859	0.149209	0.560768	0.51614	0.55308	0.541947	0.426156	0.43978	0.515727	0.43245	0.307472	0.2888	0.177101	0.195441	1	0.863734	0.555629	0.498642	0.351306	0.218723	0.265807	0.241747	0.253943	0.173676	0.221523	0.384549	0.285686	0.393638	0.427669	0.341668	0.332457	0.246946	0.165635	0.196083	0.153522	0.22521	0.346017	0.391342	0.312527	0.235786	0.331283
rnr1D57N_msh6-Rep2	0.315474	0.459928	0.493728	0.463046	0.291548	0.212109	0.231186	0.213708	0.25992	0.158777	0.511478	0.494312	0.506422	0.5561	0.382347	0.446707	0.505921	0.383482	0.296752	0.289241	0.153121	0.207973	0.863734	1	0.518262	0.463082	0.367157	0.146999	0.219995	0.257248	0.20267	0.107807	0.235727	0.322141	0.236448	0.386025	0.376325	0.345397	0.353775	0.218984	0.108465	0.0973726	0.11669	0.140971	0.334731	0.32482	0.306311	0.270977	0.352525
rnr1D57N_msh6-Rep3	0.353589	0.448844	0.415371	0.400091	0.300777	0.288143	0.255986	0.151538	0.244082	0.210163	0.4687	0.47027	0.475564	0.47027	0.450183	0.454017	0.485216	0.46635	0.324808	0.278164	0.116929	0.165168	0.555629	0.518262	1	0.488447	0.371113	0.243216	0.249594	0.255377	0.257084	0.168179	0.244187	0.371658	0.234728	0.391371	0.356212	0.333862	0.351202	0.231884	0.161515	0.220947	0.19693	0.209919	0.323989	0.363798	0.304084	0.24908	0.312127
rnr1D57N_msh6-Rep4	0.347161	0.409123	0.472129	0.416283	0.232518	0.278301	0.233332	0.186933	0.202776	0.243047	0.481811	0.450396	0.502834	0.459404	0.466665	0.432605	0.483788	0.465418	0.30949	0.237189	0.139088	0.163724	0.498642	0.463082	0.488447	1	0.315317	0.337526	0.288648	0.305381	0.23637	0.14145	0.215158	0.456941	0.295463	0.366397	0.413384	0.345851	0.301714	0.239435	0.195681	0.255519	0.199037	0.295941	0.340372	0.382474	0.298555	0.276531	0.362528
rnr1D57N-Rep1	0.258694	0.3114	0.31909	0.32697	0.32697	0.263515	0.250252	0.20326	0.242353	0.228237	0.345293	0.349047	0.34172	0.336581	0.322906	0.270371	0.334755	0.339451	0.303955	0.254389	0.160403	0.188814	0.351306	0.367157	0.371113	0.315317	1	0.200185	0.199728	0.255793	0.245333	0.181769	0.251231	0.316178	0.204444	0.31318	0.325766	0.264066	0.248918	0.225319	0.172328	0.252578	0.15891	0.191977	0.2887	0.279774	0.30193	0.191344	0.26815
rnr1D57N-Rep2	0.271264	0.246753	0.223063	0.2	0.219048	0.260378	0.118509	0.101724	0.187253	0.154303	0.273114	0.194441	0.285031	0.228755	0.296272	0.265789	0.228571	0.303466	0.202824	0.19576	0.117738	0.121268	0.218723	0.146999	0.243216	0.337526	0.200185	1	0.349056	0.346939	0.356403	0.179605	0.153672	0.304604	0.262613	0.328398	0.306186	0.181714	0.176815	0.255377	0.225877	0.301268	0.272166	0.328798	0.278829	0.263635	0.218704	0.150481	0.206349
rnr1D57N-Rep3	0.217483	0.244339	0.226528	0.256556	0.195471	0.286292	0.202694	0.115991	0.190162	0.188512	0.233563	0.234753	0.243755	0.195628	0.329378	0.242452	0.232122	0.286838	0.195134	0.154533	0.117469	0.162967	0.265807	0.219995	0.249594	0.288648	0.199728	0.349056	1	0.296697	0.288749	0.175538	0.160622	0.248089	0.224583	0.315946	0.274315	0.207199	0.189012	0.176796	0.193167	0.277459	0.249377	0.361522	0.23845	0.261055	0.174564	0.214483	0.203616
rnr1D57N-Rep4	0.271264	0.272727	0.264887	0.242857	0.209524	0.223181	0.237018	0.16954	0.198956	0.19839	0.251265	0.217317	0.262229	0.263068	0.281458	0.283508	0.271429	0.271523	0.228177	0.271052	0.176606	0.225212	0.241747	0.257248	0.255377	0.305381	0.255793	0.346939	0.296697	1	0.318887	0.179605	0.221971	0.261089	0.243855	0.259981	0.218704	0.196857	0.235753	0.15809	0.112938	0.231745	0.213844	0.21137	0.223063	0.194257	0.160383	0.167202	0.190476
rnr1D57N-Rep5	0.218165	0.214865	0.269098	0.223221	0.21009	0.205136	0.204238	0.124666	0.236655	0.141827	0.261073	0.231284	0.241026	0.231284	0.299549	0.276871	0.236352	0.322971	0.186425	0.193773	0.144291	0.175156	0.253943	0.20267	0.257084	0.23637	0.245333	0.356403	0.288749	0.318887	1	0.165083	0.109859	0.239979	0.258621	0.289268	0.294831	0.167021	0.216692	0.178841	0.228375	0.191706	0.196554	0.280626	0.281912	0.242319	0.214423	0.169051	0.175075
rnr1D57N-Rep6	0.191837	0.212261	0.122694	0.197566	0.143684	0.187061	0.093121	0.0213152	0.176566	0.110855	0.164817	0.186939	0.172009	0.143799	0.260739	0.200496	0.197566	0.261046	0.127499	0.132524	0.0986827	0.0435607	0.173676	0.107807	0.168179	0.14145	0.181769	0.179605	0.175538	0.179605	0.165083	1	0.150269	0.182362	0.117917	0.206437	0.146647	0.171343	0.0926244	0.168179	0.0851943	0.174815	0.195529	0.206689	0.157749	0.191893	0.20164	0.16817	0.159649
rnr1D57N-Rep7	0.156032	0.217314	0.209956	0.179284	0.223109	0.155606	0.198303	0.198587	0.264376	0.258199	0.201083	0.220098	0.219396	0.248807	0.223091	0.20755	0.203189	0.227172	0.212119	0.176383	0.164177	0.173931	0.221523	0.235727	0.244187	0.215158	0.251231	0.153672	0.160622	0.221971	0.109859	0.150269	1	0.182036	0.141247	0.206068	0.170783	0.190041	0.184918	0.172966	0.0944911	0.116335	0.13012	0.157195	0.163299	0.150918	0.207379	0.181858	0.212485
rnr1Y285A_msh2-Rep1	0.385598	0.43383	0.346807	0.375678	0.257221	0.317248	0.252688	0.253049	0.274495	0.266341	0.450344	0.365817	0.429477	0.34143	0.463261	0.415596	0.426445	0.499484	0.324351	0.27827	0.209203	0.160067	0.384549	0.322141	0.371658	0.456941	0.316178	0.304604	0.248089	0.261089	0.239979	0.182362	0.182036	1	0.479957	0.59324	0.590682	0.516607	0.50268	0.509949	0.401351	0.444719	0.359245	0.400613	0.535073	0.522681	0.518142	0.451582	0.473828
rnr1Y285A_msh2-Rep2	0.249331	0.346172	0.281912	0.302005	0.166321	0.22223	0.149774	0.140249	0.172113	0.243132	0.32132	0.273336	0.282944	0.231284	0.32678	0.293158	0.302005	0.396374	0.186425	0.193773	0.1984	0.127386	0.285686	0.236448	0.234728	0.295463	0.204444	0.262613	0.224583	0.243855	0.258621	0.117917	0.141247	0.479957	1	0.440191	0.469049	0.417554	0.325037	0.413569	0.311421	0.340811	0.303765	0.345386	0.384426	0.395362	0.428845	0.322733	0.335561
rnr1Y285A_msh2-Rep3	0.42059	0.452791	0.401939	0.4406	0.274577	0.299276	0.238373	0.261448	0.274639	0.280812	0.490754	0.3681	0.412791	0.406444	0.486678	0.451454	0.4406	0.535441	0.339973	0.242313	0.210508	0.197461	0.393638	0.386025	0.391371	0.366397	0.31318	0.328398	0.315946	0.259981	0.289268	0.206437	0.206068	0.59324	0.440191	1	0.576771	0.467035	0.493961	0.472906	0.36347	0.419526	0.364962	0.393664	0.476719	0.474465	0.498564	0.470841	0.457628
rnr1Y285A_msh2-Rep4	0.399714	0.408248	0.40837	0.408248	0.292578	0.292322	0.243417	0.254363	0.250838	0.220479	0.468293	0.384061	0.423563	0.375889	0.455084	0.417755	0.449073	0.502079	0.316979	0.31199	0.238328	0.19803	0.427669	0.376325	0.356212	0.413384	0.325766	0.306186	0.274315	0.218704	0.294831	0.146647	0.170783	0.590682	0.469049	0.576771	1	0.476017	0.505291	0.460469	0.355023	0.364246	0.333333	0.402694	0.468131	0.475831	0.479167	0.370309	0.453609
rnr1Y285A_msh2-Rep5	0.289337	0.356545	0.362058	0.328599	0.254399	0.207	0.208842	0.251597	0.208412	0.21263	0.36477	0.28855	0.321469	0.330984	0.32975	0.341839	0.370999	0.367385	0.263367	0.223467	0.160162	0.128544	0.341668	0.345397	0.333862	0.345851	0.264066	0.181714	0.207199	0.196857	0.167021	0.171343	0.190041	0.516607	0.417554	0.467035	0.476017	1	0.50292	0.433118	0.251401	0.240736	0.27407	0.226541	0.43447	0.401529	0.486835	0.483847	0.482888
rnr1Y285A_msh2-Rep6	0.330499	0.356309	0.332166	0.350683	0.247541	0.187991	0.224602	0.244814	0.261942	0.190982	0.354936	0.313803	0.345729	0.330319	0.331556	0.35821	0.371312	0.345949	0.292876	0.271803	0.155844	0.200125	0.332457	0.353775	0.351202	0.301714	0.248918	0.176815	0.189012	0.235753	0.216692	0.0926244	0.184918	0.50268	0.325037	0.493961	0.505291	0.50292	1	0.395102	0.244623	0.26771	0.266681	0.305216	0.432823	0.380686	0.421076	0.482875	0.48133
rnr1Y285A_msh2-Rep7	0.272769	0.348241	0.274145	0.33199	0.198627	0.221648	0.167715	0.202051	0.209213	0.197028	0.351525	0.258989	0.292132	0.265805	0.353085	0.306198	0.314965	0.371176	0.279486	0.188434	0.152008	0.123876	0.246946	0.218984	0.231884	0.239435	0.225319	0.255377	0.176796	0.15809	0.178841	0.168179	0.172966	0.509949	0.413569	0.472906	0.460469	0.433118	0.395102	1	0.30957	0.34523	0.33594	0.349864	0.431985	0.413407	0.469157	0.458307	0.435087
rnr1Y285A_msh3-Rep1	0.225176	0.258732	0.169734	0.173925	0.189737	0.30877	0.180352	0.243941	0.168392	0.243975	0.217643	0.16457	0.201902	0.139252	0.295122	0.274563	0.205548	0.318198	0.210455	0.183333	0.195468	0.134219	0.165635	0.108465	0.161515	0.195681	0.172328	0.225877	0.193167	0.112938	0.228375	0.0851943	0.0944911	0.401351	0.311421	0.36347	0.355023	0.251401	0.244623	0.30957	1	0.589938	0.451848	0.545869	0.277746	0.276433	0.322749	0.129541	0.158114
rnr1Y285A_msh3-Rep2	0.288782	0.265453	0.189974	0.275776	0.194666	0.38015	0.235502	0.231026	0.186056	0.300376	0.235702	0.168845	0.23304	0.168845	0.370075	0.301816	0.243332	0.417149	0.259107	0.170996	0.200545	0.17705	0.196083	0.0973726	0.220947	0.255519	0.252578	0.301268	0.277459	0.231745	0.191706	0.174815	0.116335	0.444719	0.340811	0.419526	0.364246	0.240736	0.26771	0.34523	0.589938	1	0.529813	0.56005	0.26913	0.29937	0.24835	0.170879	0.198271
rnr1Y285A_msh3-Rep3	0.274551	0.272166	0.146083	0.204124	0.226805	0.283463	0.211667	0.209951	0.178373	0.31497	0.23935	0.174325	0.217212	0.130744	0.352778	0.270064	0.217732	0.319505	0.217357	0.215166	0.243001	0.181527	0.153522	0.11669	0.19693	0.199037	0.15891	0.272166	0.249377	0.213844	0.196554	0.195529	0.13012	0.359245	0.303765	0.364962	0.333333	0.27407	0.266681	0.33594	0.451848	0.529813	1	0.559297	0.278887	0.290786	0.180556	0.1752	0.196564
rnr1Y285A_msh3-Rep4	0.253637	0.254071	0.192524	0.213719	0.197279	0.385253	0.204569	0.214616	0.215489	0.27904	0.226294	0.210599	0.249289	0.157949	0.357995	0.305868	0.279478	0.385988	0.218821	0.225279	0.248401	0.239236	0.22521	0.140971	0.209919	0.295941	0.191977	0.328798	0.361522	0.21137	0.280626	0.206689	0.157195	0.400613	0.345386	0.393664	0.402694	0.226541	0.305216	0.349864	0.545869	0.56005	0.559297	1	0.288787	0.319357	0.218126	0.173173	0.164399
rnr1Y285A_msh6-Rep1	0.335872	0.381488	0.342857	0.341565	0.26024	0.266808	0.172033	0.185309	0.183882	0.19576	0.447774	0.375046	0.381638	0.351605	0.354186	0.290509	0.380601	0.381881	0.268451	0.174877	0.120645	0.118345	0.346017	0.334731	0.323989	0.340372	0.2887	0.278829	0.23845	0.223063	0.281912	0.157749	0.163299	0.535073	0.384426	0.476719	0.468131	0.43447	0.432823	0.431985	0.277746	0.26913	0.278887	0.288787	1	0.606642	0.527893	0.456882	0.498793
rnr1Y285A_msh6-Rep2	0.345811	0.432664	0.341236	0.349663	0.207208	0.278191	0.141005	0.126797	0.167099	0.194834	0.445657	0.381049	0.41084	0.365496	0.382727	0.337325	0.378801	0.434372	0.249944	0.17405	0.120075	0.0942286	0.391342	0.32482	0.363798	0.382474	0.279774	0.263635	0.261055	0.194257	0.242319	0.191893	0.150918	0.522681	0.395362	0.474465	0.475831	0.401529	0.380686	0.413407	0.276433	0.29937	0.290786	0.319357	0.606642	1	0.584876	0.420618	0.453267
rnr1Y285A_msh6-Rep3	0.351264	0.436083	0.348608	0.316392	0.244949	0.212598	0.211667	0.193801	0.234115	0.267725	0.429268	0.367718	0.382836	0.343203	0.370417	0.3418	0.357217	0.38797	0.289809	0.172133	0.140193	0.0990148	0.312527	0.306311	0.304084	0.298555	0.30193	0.218704	0.174564	0.160383	0.214423	0.20164	0.207379	0.518142	0.428845	0.498564	0.479167	0.486835	0.421076	0.469157	0.322749	0.24835	0.180556	0.218126	0.527893	0.584876	1	0.453928	0.48763
rnr1Y285A_msh6-Rep4	0.208353	0.297923	0.251285	0.257491	0.179463	0.137137	0.121366	0.152793	0.163003	0.162539	0.375915	0.281124	0.280227	0.327978	0.254869	0.261309	0.280899	0.274798	0.2181	0.135709	0.096461	0.0851599	0.235786	0.270977	0.24908	0.276531	0.191344	0.150481	0.214483	0.167202	0.169051	0.16817	0.181858	0.451582	0.322733	0.470841	0.370309	0.483847	0.482875	0.458307	0.129541	0.170879	0.1752	0.173173	0.456882	0.420618	0.453928	1	0.611215
rnr1Y285A_msh6-Rep5	0.237356	0.343434	0.29277	0.344444	0.17037	0.15912	0.161304	0.145051	0.191154	0.154303	0.399353	0.302464	0.33697	0.35584	0.334129	0.316978	0.311111	0.372678	0.216909	0.128834	0.106836	0.0943194	0.331283	0.352525	0.312127	0.362528	0.26815	0.206349	0.203616	0.190476	0.175075	0.159649	0.212485	0.473828	0.335561	0.457628	0.453609	0.482888	0.48133	0.435087	0.158114	0.198271	0.196564	0.164399	0.498793	0.453267	0.48763	0.611215	1
rnr1Y285A_pGAL_msh2-Rep1	0.442219	0.463547	0.478474	0.460873	0.268025	0.217023	0.233867	0.22111	0.29723	0.21183	0.412428	0.392546	0.422598	0.384696	0.43723	0.474342	0.500096	0.449492	0.330647	0.341096	0.20204	0.202152	0.402989	0.395195	0.375627	0.375101	0.297719	0.266158	0.215635	0.224133	0.218886	0.193729	0.210963	0.467946	0.321891	0.450828	0.440352	0.394977	0.394443	0.375627	0.232565	0.254514	0.20016	0.274051	0.38278	0.428591	0.410328	0.344305	0.337756
rnr1Y285A_pGAL_msh2-Rep2	0.481998	0.452291	0.435986	0.477213	0.250452	0.356904	0.252688	0.240999	0.249541	0.266341	0.434815	0.390205	0.453787	0.365817	0.600133	0.52894	0.507673	0.53354	0.35138	0.246162	0.22315	0.197006	0.400913	0.365674	0.40623	0.422671	0.316178	0.261089	0.310111	0.304604	0.306639	0.218834	0.230578	0.463918	0.333304	0.457087	0.424876	0.333642	0.345592	0.40623	0.305027	0.362364	0.276342	0.350536	0.366624	0.443786	0.393788	0.320861	0.34973
rnr1Y285A_pGAL_msh2-Rep3	0.368349	0.456435	0.418709	0.438178	0.30429	0.332768	0.236651	0.195008	0.269227	0.169031	0.46772	0.387367	0.43713	0.365441	0.444903	0.475556	0.502079	0.479692	0.324017	0.23094	0.175549	0.210334	0.448724	0.414874	0.44294	0.369742	0.284268	0.26082	0.26766	0.182574	0.251718	0.131165	0.152753	0.454171	0.323638	0.44593	0.475164	0.338674	0.348375	0.411856	0.288675	0.266557	0.248452	0.330165	0.374166	0.41673	0.419263	0.299162	0.334719
rnr1Y285A_pGAL_msh2-Rep4	0.359036	0.399232	0.342857	0.341565	0.266746	0.330334	0.27323	0.277963	0.239847	0.255994	0.402996	0.351605	0.350484	0.343792	0.425024	0.387346	0.380601	0.469168	0.31175	0.267459	0.18767	0.177518	0.353881	0.326363	0.382141	0.329392	0.273505	0.250946	0.298063	0.29277	0.256284	0.192805	0.186628	0.525164	0.384426	0.551498	0.537853	0.486192	0.55361	0.415371	0.385758	0.364117	0.318728	0.369005	0.457143	0.426545	0.448211	0.456882	0.466263
rnr1Y285A_pGAL_msh3-Rep1	0.253637	0.269017	0.160437	0.312358	0.273998	0.36385	0.272758	0.292659	0.255894	0.329775	0.251438	0.210599	0.236168	0.171112	0.306853	0.224303	0.328798	0.349227	0.291761	0.225279	0.270983	0.259172	0.211962	0.155068	0.181929	0.240452	0.191977	0.234856	0.241014	0.21137	0.19428	0.147635	0.137546	0.417305	0.366973	0.377918	0.369136	0.313673	0.271303	0.321875	0.493881	0.533381	0.536925	0.513514	0.30483	0.271453	0.234905	0.192414	0.219199
rnr1Y285A_pGAL_msh3-Rep2	0.271474	0.27727	0.178588	0.289747	0.254164	0.357365	0.205574	0.253376	0.212384	0.258841	0.256561	0.219774	0.255585	0.195355	0.347894	0.245897	0.289747	0.375097	0.270641	0.241121	0.251367	0.221918	0.221196	0.143843	0.220686	0.205889	0.213696	0.283212	0.242199	0.19607	0.280337	0.164337	0.109362	0.464517	0.320385	0.408988	0.435801	0.307132	0.346039	0.363483	0.458131	0.544248	0.539563	0.576624	0.342294	0.325863	0.233465	0.232032	0.271109
rnr1Y285A_pGAL_msh3-Rep3	0.232588	0.246691	0.161835	0.241209	0.201008	0.353281	0.203224	0.232588	0.160555	0.302407	0.265157	0.156911	0.216569	0.156911	0.312653	0.224387	0.195982	0.40452	0.254171	0.15891	0.207079	0.2011	0.170075	0.103418	0.179664	0.203536	0.22299	0.279975	0.276266	0.236902	0.217747	0.135383	0.126131	0.382673	0.336518	0.389874	0.384661	0.271661	0.264337	0.320829	0.524404	0.611395	0.574427	0.570034	0.294245	0.292854	0.230797	0.141157	0.184257
rnr1Y285A_pGAL_msh3-Rep4	0.244238	0.187089	0.150629	0.188648	0.205798	0.290254	0.213403	0.223885	0.154547	0.264628	0.196722	0.137309	0.177932	0.164771	0.302321	0.191446	0.222948	0.32596	0.197835	0.21693	0.235571	0.187175	0.165837	0.117647	0.13139	0.212246	0.160214	0.269498	0.209519	0.195998	0.225189	0.123208	0.122988	0.383087	0.360302	0.328532	0.35007	0.254503	0.265331	0.27738	0.488094	0.472953	0.536774	0.592078	0.234312	0.249861	0.192539	0.100362	0.114332
rnr1Y285A_pGAL_msh6-Rep1	0.226101	0.309279	0.252326	0.272166	0.190516	0.124015	0.197556	0.226101	0.189522	0.251976	0.364228	0.30507	0.282375	0.32686	0.282223	0.253185	0.31299	0.289076	0.169055	0.157788	0.149539	0.115517	0.296078	0.303394	0.220099	0.275589	0.222475	0.155523	0.182877	0.194404	0.160817	0.0977647	0.16265	0.483599	0.428845	0.430134	0.444444	0.490441	0.449148	0.428613	0.279715	0.264906	0.277778	0.268462	0.451531	0.356873	0.472222	0.398182	0.378008
rnr1Y285A_pGAL_msh6-Rep2	0.28169	0.291301	0.231636	0.284828	0.205709	0.185407	0.159983	0.211268	0.184727	0.274687	0.353946	0.294558	0.24626	0.285056	0.307659	0.235523	0.296695	0.278641	0.189558	0.187647	0.19562	0.143918	0.286901	0.254414	0.242461	0.22699	0.20326	0.16954	0.202984	0.203448	0.186998	0.106576	0.156032	0.494048	0.451913	0.46606	0.460277	0.452875	0.367222	0.414205	0.356529	0.346539	0.387601	0.35119	0.45169	0.414974	0.436051	0.416707	0.382407
rnr1Y285A_pGAL_msh6-Rep3	0.149564	0.267326	0.150319	0.182036	0.177369	0.109381	0.145202	0.149564	0.114715	0.151248	0.235581	0.190591	0.189983	0.224224	0.159723	0.138947	0.224045	0.172212	0.13668	0.162363	0.153875	0.101885	0.191824	0.18011	0.14304	0.173298	0.141715	0.10002	0.136857	0.080016	0.0551597	0.0502995	0.100419	0.327007	0.257412	0.29507	0.314414	0.326545	0.274413	0.309919	0.265684	0.249871	0.323942	0.253225	0.314303	0.272014	0.271539	0.262225	0.248939
rnr1Y285A_pGAL_msh6-Rep4	0.190308	0.303706	0.247779	0.293987	0.258353	0.173972	0.207853	0.222027	0.197054	0.268055	0.347446	0.246077	0.277287	0.299572	0.318708	0.215473	0.253898	0.268926	0.237156	0.211289	0.201911	0.162051	0.269207	0.27501	0.204757	0.225519	0.249675	0.171811	0.277535	0.248171	0.228105	0.120004	0.175691	0.407044	0.350931	0.396784	0.409159	0.38245	0.344574	0.364013	0.253546	0.325166	0.290957	0.307562	0.365148	0.311504	0.368243	0.406647	0.356348
rnr1Y285A_pGAL-Rep1	0.255315	0.349977	0.298347	0.339683	0.226455	0.265338	0.223082	0.215002	0.166968	0.2446	0.363667	0.317292	0.334353	0.317292	0.363976	0.365148	0.32836	0.367118	0.231089	0.179029	0.186636	0.137309	0.337593	0.300985	0.308435	0.305739	0.255628	0.194105	0.248993	0.194105	0.23788	0.16269	0.148866	0.448365	0.386556	0.498881	0.473806	0.432076	0.408749	0.414459	0.411766	0.385727	0.3698	0.390905	0.464095	0.461901	0.427581	0.397569	0.390007
rnr1Y285A_pGAL-Rep2	0.340931	0.354429	0.270338	0.338573	0.232555	0.253785	0.1915	0.206994	0.210129	0.284961	0.376601	0.312147	0.343904	0.320362	0.361723	0.292691	0.379612	0.390007	0.264018	0.24874	0.183208	0.161744	0.314168	0.299122	0.296946	0.357838	0.303515	0.249166	0.238152	0.234509	0.242492	0.165844	0.196205	0.572948	0.431096	0.511009	0.534039	0.435014	0.39154	0.401751	0.405554	0.432733	0.363007	0.387941	0.480601	0.478329	0.450268	0.408278	0.410391
rnr1Y285A_pGAL-Rep3	0.314539	0.371451	0.312533	0.320251	0.257674	0.287539	0.240476	0.262116	0.217126	0.289679	0.363131	0.282931	0.361349	0.300614	0.412244	0.328736	0.375467	0.370399	0.264579	0.22117	0.182027	0.160701	0.329257	0.303022	0.310218	0.323037	0.292301	0.299743	0.283319	0.268191	0.261007	0.138839	0.211185	0.515781	0.478512	0.475984	0.484647	0.479934	0.398655	0.432426	0.401597	0.429945	0.435807	0.399406	0.50652	0.439768	0.495918	0.348976	0.441726
rnr1Y285A_pGAL-Rep4	0.312639	0.359228	0.332069	0.296364	0.278069	0.271512	0.216258	0.234479	0.197829	0.237118	0.352543	0.325162	0.341646	0.307586	0.375607	0.32675	0.351246	0.392705	0.26298	0.242974	0.196005	0.15973	0.318422	0.310603	0.327031	0.333435	0.290535	0.26657	0.254787	0.26657	0.216191	0.138	0.183671	0.490374	0.41797	0.483621	0.470516	0.48867	0.475495	0.401781	0.381816	0.391735	0.313678	0.378948	0.482035	0.469095	0.470516	0.385408	0.439057
rnr1Y285A_pGAL-Rep5	0.350781	0.381385	0.325669	0.352781	0.292395	0.310326	0.2274	0.260257	0.210899	0.294245	0.430187	0.328254	0.357645	0.312986	0.35593	0.331135	0.343247	0.437061	0.313043	0.26131	0.235743	0.184999	0.338062	0.302507	0.31654	0.386183	0.311753	0.286039	0.244616	0.258797	0.30047	0.119873	0.193733	0.571176	0.438185	0.502288	0.515756	0.485121	0.452374	0.462636	0.452267	0.417615	0.415199	0.48592	0.521071	0.463042	0.467099	0.446377	0.444949
rnr1Y285A_pGAL-Rep6	0.335941	0.39115	0.298347	0.294392	0.226455	0.383266	0.1996	0.241878	0.213347	0.297014	0.406961	0.308226	0.361462	0.317292	0.446164	0.407281	0.373651	0.481051	0.261231	0.262575	0.217742	0.178501	0.301097	0.281567	0.346989	0.369434	0.290887	0.323508	0.345824	0.307332	0.297351	0.16269	0.202999	0.586323	0.431158	0.520572	0.520031	0.492087	0.408749	0.443375	0.483378	0.477567	0.493067	0.558436	0.486195	0.472899	0.427581	0.437326	0.44033
rnr1Y285A-Rep1	0.29819	0.310648	0.313861	0.331662	0.281411	0.235521	0.218857	0.214697	0.181139	0.201605	0.422714	0.329916	0.312822	0.362103	0.364761	0.349047	0.27136	0.314627	0.285385	0.211881	0.151858	0.121879	0.348249	0.336107	0.316552	0.305304	0.336441	0.201008	0.24557	0.244081	0.277133	0.162459	0.228237	0.459208	0.356313	0.44282	0.471851	0.458095	0.404281	0.393551	0.317821	0.358685	0.355598	0.297409	0.470792	0.390472	0.420563	0.399945	0.413182
rnr1Y285A-Rep2	0.283194	0.325396	0.285798	0.303703	0.245855	0.254177	0.236194	0.193087	0.231031	0.267785	0.414727	0.321314	0.354915	0.338683	0.382409	0.309429	0.314549	0.315296	0.269493	0.205798	0.208584	0.131533	0.349615	0.297626	0.276995	0.341692	0.219544	0.247921	0.278274	0.18594	0.256359	0.175328	0.142605	0.495584	0.384539	0.477898	0.476018	0.436897	0.391557	0.424726	0.360147	0.387098	0.354246	0.445789	0.497501	0.431938	0.442807	0.406237	0.349499
rnr1Y285A-Rep3	0.303627	0.319801	0.280885	0.319801	0.255841	0.291442	0.232133	0.240372	0.20086	0.230283	0.366837	0.307255	0.357321	0.358464	0.36478	0.317332	0.298481	0.34563	0.302696	0.224733	0.204998	0.142199	0.326424	0.310791	0.290382	0.31183	0.298758	0.274115	0.273489	0.243658	0.195962	0.153168	0.203859	0.497887	0.391925	0.469681	0.489593	0.429385	0.439799	0.417424	0.3371	0.36315	0.391675	0.38555	0.457738	0.372742	0.435194	0.386775	0.426401
rnr1Y285A-Rep4	0.369221	0.353535	0.303613	0.355556	0.288889	0.303774	0.253477	0.197797	0.24577	0.291462	0.390856	0.35584	0.328102	0.35584	0.357172	0.303196	0.333333	0.360255	0.285926	0.257667	0.167885	0.202113	0.367097	0.314414	0.312127	0.325025	0.30275	0.238095	0.285062	0.269841	0.277202	0.179605	0.185924	0.473828	0.36474	0.468271	0.47629	0.482888	0.46987	0.397253	0.368932	0.378517	0.332647	0.420131	0.45542	0.431683	0.419589	0.416146	0.407407
rnr1Y285A-Rep5	0.321382	0.324514	0.24025	0.233874	0.229771	0.288453	0.229752	0.248341	0.221849	0.265908	0.320043	0.285801	0.294713	0.266091	0.306336	0.25955	0.29542	0.357813	0.305833	0.246525	0.219803	0.164197	0.267813	0.221655	0.251478	0.276977	0.220401	0.246183	0.240608	0.193429	0.242441	0.243187	0.205971	0.499922	0.371742	0.448021	0.46483	0.469716	0.380878	0.450564	0.428174	0.359425	0.335013	0.404722	0.396412	0.394538	0.477393	0.345762	0.328244
rnr1Y285F_msh2-Rep1	0.46684	0.434235	0.420447	0.421464	0.256	0.329219	0.252511	0.25565	0.237857	0.274585	0.501358	0.389932	0.433537	0.374934	0.456461	0.464677	0.421464	0.492153	0.324123	0.276429	0.218705	0.20444	0.362267	0.369433	0.334855	0.347735	0.284361	0.267596	0.297498	0.267596	0.319747	0.168216	0.212692	0.570575	0.455025	0.583106	0.56398	0.466606	0.463687	0.518229	0.355409	0.364642	0.369614	0.400332	0.530128	0.482137	0.506626	0.471362	0.437073
rnr1Y285F_msh2-Rep2	0.403446	0.432664	0.426545	0.437079	0.297861	0.240256	0.261866	0.253595	0.254627	0.284758	0.475367	0.404379	0.41084	0.404379	0.433086	0.409609	0.456504	0.434372	0.275801	0.255956	0.200125	0.188457	0.42265	0.399778	0.372066	0.382474	0.272212	0.222008	0.237323	0.263635	0.280579	0.139558	0.162527	0.522681	0.45913	0.520981	0.53531	0.494189	0.500902	0.413407	0.276433	0.283614	0.277568	0.319357	0.46446	0.424528	0.446092	0.409249	0.442475
rnr1Y285F_msh2-Rep3	0.460137	0.450835	0.413572	0.378701	0.300557	0.328685	0.308546	0.24612	0.25115	0.236522	0.524038	0.433148	0.510924	0.404272	0.504893	0.458537	0.468868	0.483887	0.336043	0.313646	0.235322	0.185884	0.406888	0.386588	0.376101	0.405783	0.329916	0.244739	0.25336	0.25762	0.260469	0.178139	0.183209	0.576769	0.390704	0.578641	0.634981	0.496999	0.511501	0.460531	0.327903	0.336421	0.343565	0.370584	0.501565	0.472921	0.487739	0.443236	0.450835
rnr1Y285F_msh2-Rep4	0.470395	0.483368	0.433982	0.435031	0.277131	0.213959	0.260639	0.217988	0.245514	0.208839	0.517497	0.456665	0.493785	0.441185	0.451107	0.443663	0.473701	0.453955	0.334558	0.264948	0.185908	0.187574	0.444041	0.397905	0.403241	0.391559	0.285989	0.248589	0.20078	0.234779	0.266571	0.190994	0.150211	0.539865	0.39351	0.564839	0.582136	0.450885	0.478614	0.427929	0.244567	0.282286	0.263112	0.286075	0.443416	0.469489	0.503202	0.407333	0.408178
rnr1Y285F_msh3-Rep1	0.288046	0.281938	0.236863	0.26968	0.251701	0.386203	0.251681	0.256041	0.265117	0.249675	0.27841	0.237508	0.279796	0.205121	0.335574	0.250873	0.296648	0.301511	0.335023	0.312694	0.314869	0.212573	0.260777	0.196561	0.218088	0.288243	0.178454	0.288943	0.230627	0.231154	0.26558	0.169526	0.209514	0.410728	0.354107	0.374544	0.426623	0.300153	0.3616	0.298437	0.362441	0.415605	0.330289	0.465519	0.328976	0.340517	0.275241	0.220946	0.224733
rnr1Y285F_msh3-Rep2	0.319099	0.325912	0.237407	0.268877	0.26461	0.350049	0.252259	0.258318	0.220273	0.316104	0.303528	0.256279	0.26568	0.205023	0.345197	0.254096	0.268877	0.357874	0.295397	0.242933	0.246221	0.186321	0.24762	0.175665	0.239783	0.288105	0.209321	0.274365	0.250275	0.146328	0.218557	0.137977	0.153033	0.403005	0.302617	0.392439	0.418167	0.352869	0.277326	0.337876	0.526355	0.436177	0.418167	0.526228	0.299883	0.323337	0.300557	0.209798	0.170716
rnr1Y285F_msh3-Rep3	0.314967	0.268076	0.201444	0.235907	0.235907	0.32632	0.244624	0.27997	0.21742	0.341262	0.248054	0.212486	0.235343	0.188877	0.351647	0.274319	0.28014	0.346175	0.274751	0.233126	0.243033	0.23244	0.213862	0.139073	0.238471	0.298593	0.20661	0.294884	0.252181	0.231695	0.232321	0.132407	0.158604	0.449114	0.329121	0.395427	0.436399	0.281319	0.30415	0.313777	0.489565	0.597956	0.501608	0.557504	0.259	0.286417	0.225723	0.172568	0.163824
rnr1Y285F_msh3-Rep4	0.332365	0.305516	0.245976	0.308062	0.270721	0.346372	0.217803	0.282511	0.229431	0.324102	0.289122	0.235435	0.257035	0.190591	0.363006	0.260525	0.280056	0.266145	0.335488	0.295205	0.288515	0.203771	0.214392	0.18011	0.20264	0.283579	0.207122	0.260052	0.222393	0.220044	0.183866	0.0754493	0.184102	0.383878	0.330958	0.348719	0.385872	0.296859	0.332184	0.309919	0.442807	0.477026	0.419219	0.460409	0.300637	0.272014	0.271539	0.229447	0.217821
rnr1Y285F_msh6-Rep1	0.345246	0.421488	0.399232	0.4	0.230303	0.236707	0.169683	0.20499	0.208532	0.182359	0.549207	0.458549	0.457086	0.458549	0.367647	0.372104	0.390909	0.447214	0.25814	0.239566	0.112386	0.110243	0.476168	0.420951	0.394673	0.398895	0.318477	0.246753	0.244339	0.220779	0.238739	0.14695	0.173851	0.516904	0.334235	0.513743	0.491754	0.433635	0.450075	0.410151	0.229984	0.235958	0.197939	0.254071	0.505694	0.476813	0.482475	0.425604	0.444444
rnr1Y285F_msh6-Rep2	0.348135	0.433348	0.411519	0.375846	0.238342	0.238688	0.19962	0.163188	0.270356	0.19803	0.497722	0.40367	0.453595	0.433028	0.380229	0.352478	0.403347	0.399711	0.252166	0.164268	0.113326	0.144516	0.457992	0.432334	0.390173	0.412547	0.335415	0.314297	0.268782	0.261914	0.264811	0.181108	0.175306	0.521229	0.397216	0.518042	0.477157	0.466415	0.444386	0.421387	0.231908	0.312287	0.21207	0.256197	0.500979	0.498611	0.486513	0.472082	0.509277
rnr1Y285F_msh6-Rep3	0.33667	0.446355	0.36203	0.381881	0.210944	0.198867	0.203653	0.155386	0.205587	0.202031	0.534001	0.42805	0.452808	0.410578	0.429935	0.365399	0.381881	0.426956	0.213001	0.184017	0.119898	0.0793884	0.448405	0.392953	0.371519	0.405099	0.305788	0.249392	0.226606	0.233805	0.272207	0.156772	0.156492	0.59823	0.429801	0.543439	0.467707	0.462621	0.450149	0.436535	0.189768	0.283197	0.282109	0.269061	0.500453	0.487489	0.512251	0.459728	0.497052
rnr1Y285F_msh6-Rep4	0.334072	0.379117	0.356106	0.333623	0.187663	0.176451	0.162165	0.148477	0.187904	0.209134	0.49431	0.392321	0.39107	0.434057	0.356762	0.336219	0.385752	0.349689	0.240535	0.175835	0.114567	0.12643	0.361255	0.348659	0.328374	0.363625	0.275958	0.208514	0.21653	0.26809	0.205345	0.112351	0.199378	0.497529	0.38331	0.499301	0.44691	0.430998	0.440886	0.381623	0.164845	0.202953	0.198627	0.222817	0.549421	0.486065	0.468191	0.536905	0.498118
rnr1Y285F_pGAL_msh2-Rep1	0.411113	0.46363	0.441358	0.46188	0.30792	0.275604	0.279386	0.262656	0.307439	0.237566	0.456228	0.392913	0.460776	0.385208	0.439035	0.489345	0.519615	0.494881	0.358621	0.30429	0.21148	0.198373	0.418718	0.429064	0.376796	0.433047	0.292153	0.247436	0.246871	0.288675	0.252699	0.20739	0.195519	0.57644	0.366414	0.506918	0.500867	0.469192	0.516092	0.417752	0.258647	0.280976	0.301175	0.316386	0.46014	0.439272	0.4223	0.473016	0.427667
rnr1Y285F_pGAL_msh2-Rep2	0.494048	0.489212	0.426077	0.456906	0.284297	0.317248	0.294802	0.265099	0.282813	0.266341	0.465873	0.44711	0.478097	0.357688	0.484318	0.465971	0.507673	0.53354	0.34237	0.246162	0.278937	0.209319	0.458186	0.409207	0.40623	0.456941	0.316178	0.275594	0.310111	0.246584	0.266643	0.200598	0.182036	0.608247	0.453293	0.583515	0.54923	0.452031	0.513152	0.388944	0.353189	0.362364	0.345428	0.400613	0.445894	0.473372	0.455965	0.392163	0.394857
rnr1Y285F_pGAL_msh2-Rep3	0.418722	0.464238	0.462111	0.454954	0.315682	0.26593	0.279208	0.275475	0.304255	0.257881	0.511217	0.431158	0.437193	0.431158	0.442881	0.47217	0.501377	0.415227	0.403706	0.29361	0.242319	0.20267	0.448913	0.485659	0.40309	0.428293	0.289127	0.212223	0.18149	0.238751	0.182872	0.116732	0.155364	0.546781	0.353553	0.551378	0.521192	0.472408	0.497978	0.418897	0.249569	0.256052	0.227429	0.244225	0.471172	0.477963	0.473811	0.43468	0.453922
rnr1Y285F_pGAL_msh2-Rep4	0.365204	0.466252	0.436815	0.466252	0.279751	0.230663	0.241741	0.27667	0.252099	0.244611	0.47778	0.418097	0.416763	0.395699	0.425463	0.427953	0.494228	0.396177	0.322711	0.285054	0.256179	0.180933	0.39826	0.391812	0.373086	0.377694	0.31942	0.213144	0.216455	0.213144	0.232643	0.133986	0.20062	0.520748	0.379576	0.535907	0.561523	0.474457	0.490521	0.428652	0.265396	0.27229	0.266485	0.260615	0.473216	0.452864	0.494902	0.436566	0.466252
rnr1Y285F_pGAL_msh2-Rep5	0.465853	0.522826	0.463253	0.456435	0.310376	0.344652	0.283981	0.238343	0.269227	0.253546	0.502625	0.416603	0.466272	0.387367	0.539564	0.509525	0.529465	0.571548	0.38882	0.288675	0.238246	0.243544	0.441367	0.407046	0.435169	0.482718	0.334014	0.299943	0.278812	0.299943	0.311651	0.196748	0.185485	0.602472	0.407544	0.550854	0.540383	0.474144	0.536686	0.44294	0.375278	0.385027	0.385101	0.390195	0.48107	0.478796	0.465847	0.448743	0.456435
rnr1Y285F_pGAL_msh2-Rep6	0.466411	0.528148	0.450235	0.461353	0.336047	0.311438	0.283497	0.253484	0.307964	0.290027	0.561876	0.437781	0.511389	0.444622	0.584712	0.551044	0.529702	0.544465	0.401804	0.297189	0.246446	0.207212	0.440615	0.417585	0.407275	0.432552	0.319256	0.305128	0.260941	0.280718	0.280457	0.184137	0.214442	0.667951	0.415076	0.638294	0.627822	0.49809	0.511098	0.494549	0.37824	0.443504	0.372043	0.37923	0.483585	0.514492	0.523185	0.449978	0.484136
rnr1Y285F_pGAL_msh6-Rep1	0.307137	0.411725	0.399889	0.334282	0.215666	0.154425	0.19009	0.153569	0.212016	0.183029	0.486525	0.388509	0.447512	0.492111	0.346634	0.34775	0.442114	0.349626	0.210509	0.215965	0.103684	0.130766	0.408402	0.434589	0.367173	0.351832	0.235054	0.215666	0.223956	0.26188	0.184069	0.0968367	0.231993	0.416053	0.339819	0.464783	0.440225	0.43435	0.42264	0.348815	0.119349	0.139942	0.132068	0.159548	0.431459	0.429419	0.451231	0.42911	0.443313
rnr1Y285F_pGAL_msh6-Rep2	0.27027	0.423063	0.367188	0.366355	0.250837	0.154687	0.164278	0.211516	0.210902	0.168061	0.477026	0.436014	0.426721	0.475651	0.328555	0.356157	0.425763	0.309965	0.202081	0.219179	0.0952051	0.120073	0.446815	0.449994	0.370863	0.389901	0.26979	0.155595	0.193545	0.226319	0.156015	0.124485	0.165683	0.482564	0.286028	0.445743	0.444649	0.440813	0.439141	0.362434	0.1409	0.128499	0.121268	0.130223	0.425165	0.413538	0.434543	0.428786	0.462069
rnr1Y285F_pGAL_msh6-Rep3	0.295628	0.380857	0.364646	0.373651	0.196261	0.117928	0.1996	0.147814	0.185519	0.174714	0.441596	0.38075	0.388572	0.371684	0.328753	0.323016	0.384974	0.32914	0.221041	0.167093	0.124424	0.109847	0.401463	0.407786	0.33735	0.394912	0.255628	0.177929	0.152163	0.258806	0.193278	0.16269	0.189466	0.448365	0.356821	0.368738	0.3698	0.39607	0.373713	0.327712	0.0716115	0.110208	0.138675	0.0744581	0.408846	0.362922	0.439138	0.410821	0.415168
rnr1Y285F_pGAL_msh6-Rep4	0.323721	0.39676	0.393974	0.294594	0.181848	0.170457	0.169711	0.129488	0.18771	0.134687	0.433876	0.419314	0.452808	0.419314	0.384678	0.324799	0.381881	0.341565	0.193637	0.195519	0.104911	0.105851	0.413236	0.439733	0.362231	0.34372	0.246329	0.187044	0.213276	0.218218	0.243554	0.137176	0.143451	0.443133	0.358168	0.41803	0.412028	0.451055	0.450149	0.352943	0.155265	0.141598	0.133631	0.143499	0.457862	0.402709	0.445435	0.421418	0.460682
rnr1Y285F_pGAL-Rep1	0.303627	0.377947	0.312094	0.309141	0.291374	0.208173	0.198971	0.177116	0.244525	0.246732	0.350533	0.341394	0.32329	0.392604	0.353726	0.330554	0.298481	0.357548	0.274318	0.23597	0.131784	0.180981	0.317834	0.283368	0.381126	0.31183	0.323654	0.243658	0.19535	0.274115	0.237954	0.172314	0.242082	0.346356	0.265949	0.377787	0.391675	0.327689	0.28587	0.299456	0.185405	0.172929	0.159571	0.17525	0.301691	0.310618	0.380795	0.299439	0.296112
rnr1Y285F_pGAL-Rep2	0.317819	0.345547	0.328789	0.362825	0.293715	0.258672	0.223947	0.164036	0.261852	0.213276	0.409582	0.331991	0.330932	0.325075	0.322484	0.332164	0.362825	0.376675	0.222302	0.254967	0.177992	0.209519	0.368946	0.325935	0.338272	0.320736	0.302634	0.24682	0.22163	0.271502	0.226863	0.170671	0.154878	0.342079	0.272236	0.347523	0.379123	0.302181	0.294034	0.257381	0.245861	0.252248	0.246871	0.269836	0.328789	0.335625	0.299772	0.232549	0.268759
rnr1Y285F_pGAL-Rep3	0.359237	0.381019	0.318127	0.325983	0.320809	0.222302	0.297787	0.23028	0.260697	0.227549	0.421411	0.347994	0.359273	0.366636	0.370222	0.308063	0.357029	0.347105	0.323699	0.24544	0.17058	0.207069	0.381518	0.37936	0.35678	0.349295	0.33837	0.232845	0.189644	0.288284	0.244593	0.167281	0.213366	0.409792	0.264975	0.40888	0.364391	0.361996	0.344231	0.297316	0.18408	0.226635	0.179555	0.178638	0.378723	0.3317	0.380235	0.281609	0.301836
rnr1Y285F_pGAL-Rep4	0.315404	0.362406	0.296411	0.294239	0.310058	0.24714	0.275585	0.191495	0.279929	0.322208	0.355661	0.326772	0.34088	0.341971	0.314954	0.306094	0.284747	0.318357	0.353741	0.210105	0.156452	0.149633	0.328887	0.276725	0.323191	0.341724	0.295567	0.21695	0.208725	0.21695	0.249261	0.170474	0.249581	0.395127	0.324039	0.409108	0.377805	0.301832	0.313274	0.298951	0.270135	0.261755	0.232495	0.280873	0.351988	0.341104	0.368118	0.288835	0.263655
rnr1Y285F_pGAL-Rep5	0.261079	0.335697	0.314363	0.274986	0.303794	0.265944	0.252559	0.223782	0.23815	0.242464	0.420574	0.333393	0.369951	0.339683	0.33403	0.302098	0.329983	0.307444	0.285841	0.231889	0.194257	0.209609	0.367206	0.350329	0.367846	0.335902	0.299707	0.235702	0.182372	0.235702	0.216645	0.127	0.225374	0.41482	0.278543	0.383795	0.408956	0.383094	0.364662	0.2809	0.28572	0.267652	0.267292	0.232495	0.3527	0.343401	0.360844	0.285064	0.331729
rnr1Y285F_pGAL-Rep6	0.383782	0.418925	0.362925	0.388057	0.323381	0.32628	0.259881	0.230269	0.311286	0.249494	0.469861	0.407786	0.432294	0.368949	0.38563	0.381049	0.404226	0.451938	0.37304	0.289742	0.222099	0.186275	0.403911	0.360486	0.41292	0.436598	0.346159	0.311832	0.286428	0.265634	0.307849	0.217803	0.251234	0.476098	0.32908	0.472358	0.519827	0.377061	0.408589	0.350982	0.294003	0.327871	0.275041	0.345563	0.418153	0.392619	0.396059	0.321715	0.377278
rnr1Y285F-Rep1	0.316278	0.397329	0.270481	0.298481	0.220307	0.291442	0.198971	0.177116	0.192127	0.230283	0.407597	0.307255	0.365828	0.31579	0.397942	0.37022	0.351781	0.381385	0.264859	0.224733	0.175712	0.168053	0.352194	0.310791	0.30853	0.395785	0.315355	0.304572	0.286513	0.213201	0.223957	0.134022	0.140153	0.487063	0.377927	0.43905	0.489593	0.372887	0.296865	0.30853	0.40452	0.397736	0.348155	0.403075	0.426528	0.424512	0.359035	0.262009	0.296112
rnr1Y285F-Rep2	0.313993	0.309244	0.209018	0.226779	0.201581	0.262436	0.156772	0.164472	0.144499	0.233285	0.327575	0.28244	0.301648	0.232004	0.378867	0.281284	0.277174	0.394405	0.190054	0.185924	0.138446	0.137505	0.274115	0.226871	0.28957	0.311845	0.255012	0.251976	0.261662	0.287973	0.21506	0.181025	0.150585	0.370973	0.297775	0.349957	0.334324	0.213675	0.22091	0.225221	0.239046	0.327008	0.360041	0.331397	0.295084	0.342637	0.244314	0.162204	0.237978
rnr1Y285F-Rep3	0.343897	0.320697	0.233609	0.289773	0.20998	0.344447	0.169837	0.209329	0.185784	0.233285	0.356479	0.272352	0.311703	0.292527	0.431124	0.328165	0.289773	0.464835	0.223593	0.185924	0.155752	0.137505	0.284268	0.226871	0.343194	0.354369	0.343286	0.287973	0.277054	0.21598	0.297775	0.226281	0.120468	0.486102	0.38049	0.434429	0.46291	0.333868	0.298878	0.353919	0.318728	0.367884	0.325752	0.35211	0.418036	0.403823	0.360041	0.28017	0.349967
rnr1Y285F-Rep4	0.307137	0.303892	0.252562	0.323498	0.215666	0.266734	0.212453	0.217556	0.229684	0.216306	0.371078	0.302174	0.352846	0.267639	0.335452	0.280875	0.280365	0.361682	0.248784	0.181865	0.177744	0.143843	0.347576	0.277398	0.293739	0.327568	0.235054	0.246475	0.23713	0.200261	0.269024	0.193673	0.231993	0.416053	0.353978	0.382155	0.374192	0.320047	0.26693	0.321277	0.238698	0.297377	0.278809	0.283642	0.378842	0.314209	0.319163	0.302901	0.323498
rnr1Y285F-Rep5	0.216394	0.300442	0.23355	0.262109	0.265908	0.237382	0.212709	0.202869	0.205392	0.193429	0.322447	0.2646	0.309232	0.328469	0.259978	0.254431	0.284901	0.280306	0.202247	0.1922	0.172191	0.152017	0.284679	0.273617	0.291029	0.307718	0.29277	0.211641	0.194915	0.227921	0.194529	0.143275	0.136209	0.289274	0.224456	0.338379	0.290776	0.289915	0.223329	0.252225	0.252262	0.240329	0.217113	0.243555	0.278035	0.276721	0.290776	0.226747	0.27857
rnr1Y285F-Rep6	0.340751	0.371451	0.387972	0.320251	0.294484	0.287539	0.217573	0.275222	0.235219	0.289679	0.413801	0.380189	0.378976	0.397872	0.412244	0.369828	0.375467	0.395092	0.274378	0.244451	0.197196	0.174093	0.38265	0.340899	0.347821	0.459707	0.318092	0.205087	0.20237	0.268191	0.246506	0.138839	0.224385	0.493355	0.37701	0.444252	0.462106	0.456523	0.364485	0.357221	0.296833	0.322458	0.225417	0.326787	0.431081	0.418316	0.450835	0.361901	0.380375
rnr1Y285F-Rep7	0.27667	0.356047	0.29121	0.335702	0.261101	0.267084	0.193392	0.177069	0.190984	0.215833	0.399338	0.365835	0.334899	0.350903	0.348106	0.300724	0.289076	0.333623	0.239965	0.245737	0.102472	0.214857	0.368203	0.343835	0.309582	0.335728	0.275863	0.199822	0.227847	0.226465	0.19591	0.150735	0.167183	0.416599	0.281621	0.366203	0.361659	0.296536	0.269305	0.293706	0.265396	0.27229	0.215726	0.245285	0.336712	0.33512	0.352141	0.294682	0.310835
rnr1Y285F-Rep8	0.339151	0.389692	0.328688	0.37763	0.299382	0.265747	0.211667	0.181688	0.259199	0.251976	0.437073	0.375889	0.382836	0.351375	0.359834	0.354459	0.367423	0.38797	0.217357	0.258199	0.19627	0.160899	0.370098	0.315063	0.356212	0.367452	0.341657	0.218704	0.249377	0.247865	0.227824	0.183309	0.182981	0.435239	0.348437	0.400807	0.40625	0.313738	0.326334	0.32146	0.225924	0.264906	0.236111	0.218126	0.378489	0.416352	0.385417	0.274746	0.351547
WT-Rep6	0.197537	0.221155	0.224912	0.256074	0.221931	0.283373	0.199152	0.197537	0.199295	0.237078	0.244781	0.26653	0.214588	0.17427	0.238983	0.190572	0.179252	0.243354	0.181783	0.21594	0.175872	0.155268	0.24762	0.186644	0.228884	0.259295	0.239224	0.219492	0.203349	0.219492	0.218557	0.206965	0.168337	0.234003	0.168121	0.196219	0.209083	0.149291	0.118854	0.163488	0.141711	0.186933	0.139389	0.23154	0.237407	0.198977	0.222151	0.0599423	0.0853579
WT-Rep7	0.233821	0.282805	0.242871	0.21776	0.304172	0.202499	0.258065	0.13537	0.246356	0.192006	0.269612	0.365299	0.306204	0.25737	0.268817	0.192927	0.238499	0.208683	0.266842	0.207678	0.185167	0.176048	0.309172	0.320104	0.273641	0.233332	0.282543	0.133322	0.177357	0.192577	0.136158	0.111745	0.210697	0.178987	0.122543	0.188712	0.201084	0.142892	0.149735	0.132407	0.0655826	0.100929	0.127	0.119332	0.141675	0.161148	0.1905	0.109229	0.161304
WT-Rep8	0.209951	0.222681	0.146083	0.217732	0.181444	0.283463	0.183445	0.14535	0.156077	0.251976	0.260163	0.217907	0.217212	0.185221	0.296334	0.202548	0.190516	0.30429	0.193206	0.186477	0.130847	0.148522	0.219317	0.140028	0.220099	0.260279	0.243663	0.272166	0.249377	0.213844	0.232291	0.219971	0.16265	0.276342	0.214423	0.234619	0.25	0.158672	0.0842152	0.220099	0.236682	0.353209	0.277778	0.380322	0.278887	0.290786	0.263889	0.111491	0.166323
WT-Rep9	0.224281	0.240523	0.172133	0.21418	0.218379	0.295241	0.156772	0.164472	0.134178	0.233285	0.269768	0.252178	0.311703	0.272352	0.274352	0.234404	0.239377	0.338062	0.201234	0.172644	0.138446	0.168061	0.213201	0.162051	0.203772	0.283496	0.245204	0.269975	0.277054	0.233978	0.198517	0.135769	0.225877	0.307012	0.231603	0.289619	0.244314	0.160257	0.142942	0.203772	0.219125	0.388322	0.240027	0.331397	0.221313	0.244741	0.205738	0.191695	0.181983
WT-Rep1	0.233246	0.309694	0.338847	0.314458	0.353766	0.170579	0.298905	0.217696	0.311284	0.202175	0.380748	0.346181	0.355534	0.377652	0.278525	0.276277	0.347215	0.256357	0.331356	0.290035	0.179976	0.198613	0.380097	0.381998	0.351336	0.302199	0.351908	0.233972	0.248111	0.290125	0.232259	0.117663	0.242736	0.22616	0.206452	0.276097	0.267452	0.229161	0.243254	0.17288	0.103584	0.138157	0.133726	0.150782	0.242947	0.241798	0.240707	0.199358	0.211095
WT-Rep2	0.26951	0.293374	0.279942	0.298807	0.247014	0.248969	0.136333	0.156032	0.137084	0.165985	0.301625	0.287085	0.27663	0.287085	0.260273	0.311325	0.286855	0.293987	0.243937	0.21418	0.14776	0.144943	0.260049	0.225478	0.203489	0.268947	0.26984	0.221971	0.175224	0.187822	0.188329	0.171736	0.157143	0.25485	0.172635	0.286205	0.280571	0.164702	0.147934	0.203489	0.132288	0.213281	0.146385	0.196494	0.233285	0.2554	0.280571	0.167869	0.159364
WT-Rep3	0.214697	0.178166	0.13241	0.180907	0.211058	0.196267	0.171959	0.161023	0.172905	0.209359	0.230571	0.217262	0.192506	0.193122	0.187592	0.130893	0.211058	0.219115	0.133774	0.174801	0.165663	0.146254	0.218668	0.193908	0.192498	0.25442	0.258199	0.150756	0.128924	0.172292	0.118771	0.162459	0.180187	0.183683	0.158362	0.173277	0.169251	0.11186	0.0932956	0.102665	0.119183	0.171191	0.164122	0.173489	0.205971	0.16107	0.138478	0.0529339	0.0670025
WT-Rep4	0.306774	0.302134	0.24025	0.233874	0.229771	0.224352	0.165932	0.146083	0.191597	0.189934	0.31063	0.335077	0.284889	0.295656	0.3191	0.274817	0.258492	0.316527	0.229375	0.194625	0.135263	0.164197	0.307489	0.29554	0.282913	0.276977	0.220401	0.263767	0.22557	0.211014	0.193952	0.176863	0.176547	0.262459	0.210115	0.259381	0.251259	0.182667	0.177743	0.17813	0.175162	0.179713	0.201008	0.222597	0.204212	0.203247	0.251259	0.115254	0.191476
WT-Rep5	0.431958	0.513743	0.523456	0.49807	0.319275	0.311746	0.278101	0.227346	0.290332	0.266032	0.512728	0.475462	0.473946	0.42945	0.526406	0.570258	0.593852	0.524732	0.399469	0.302891	0.210508	0.243922	0.463103	0.459944	0.456599	0.452608	0.365377	0.259981	0.222332	0.246298	0.238961	0.22364	0.183171	0.486263	0.364729	0.486239	0.498564	0.406118	0.454444	0.383217	0.272602	0.264146	0.273722	0.299185	0.401939	0.390736	0.430134	0.347526	0.383131
[truncated: 68 more columns]

## Sheet: ST14. cosine sim. genotypes 
Table S14. cosine scores between genotypes
	msh2	msh3	msh6	rnr1D57N_msh2	rnr1D57N_msh3	rnr1D57N_msh6	rnr1D57N	rnr1Y285A_msh2	rnr1Y285A_msh3	rnr1Y285A_msh6	rnr1Y285A_pGAL_msh2	rnr1Y285A_pGAL_msh3	rnr1Y285A_pGAL_msh6	rnr1Y285A_pGAL	rnr1Y285A	rnr1Y285F_msh2	rnr1Y285F_msh3	rnr1Y285F_msh6	rnr1Y285F_pGAL_msh2	rnr1Y285F_pGAL_msh6	rnr1Y285F_pGAL	rnr1Y285F	WT
msh2	1	0.512016	0.703656	0.767442	0.531432	0.669096	0.535211	0.626096	0.36524	0.553464	0.731426	0.362972	0.40874	0.533962	0.507093	0.679273	0.449931	0.59296	0.730248	0.590717	0.633355	0.605651	0.633455
msh3	0.512016	1	0.47991	0.502296	0.645961	0.441091	0.531492	0.478474	0.431519	0.371466	0.523756	0.457531	0.365876	0.457803	0.463087	0.482661	0.511701	0.368516	0.528076	0.353343	0.577603	0.517817	0.602398
msh6	0.703656	0.47991	1	0.688	0.449269	0.749266	0.530621	0.584013	0.298548	0.58306	0.64809	0.309242	0.4366	0.52105	0.534824	0.665779	0.376719	0.668761	0.673463	0.676753	0.657392	0.634175	0.66576
rnr1D57N_msh2	0.767442	0.502296	0.688	1	0.484722	0.668468	0.565538	0.647932	0.461365	0.537387	0.765805	0.436491	0.391698	0.567169	0.50396	0.672493	0.464328	0.562259	0.741778	0.553611	0.609458	0.630391	0.630673
rnr1D57N_msh3	0.531432	0.645961	0.449269	0.484722	1	0.438063	0.480457	0.463623	0.389774	0.319714	0.514008	0.427972	0.323531	0.418721	0.423806	0.468191	0.510546	0.315903	0.529729	0.314295	0.522343	0.453352	0.562719
rnr1D57N_msh6	0.669096	0.441091	0.749266	0.668468	0.438063	1	0.530775	0.53962	0.268305	0.498584	0.622655	0.261815	0.362482	0.481451	0.471366	0.564437	0.343947	0.581373	0.625068	0.607031	0.617975	0.589806	0.6149
rnr1D57N	0.535211	0.531492	0.530621	0.565538	0.480457	0.530775	1	0.521448	0.432822	0.473672	0.561911	0.420989	0.364085	0.522928	0.513754	0.501867	0.445405	0.489748	0.521007	0.43778	0.612191	0.59827	0.663908
rnr1Y285A_msh2	0.626096	0.478474	0.584013	0.647932	0.463623	0.53962	0.521448	1	0.55346	0.774302	0.75567	0.566402	0.670703	0.782598	0.74859	0.819566	0.595249	0.738436	0.827976	0.685942	0.689432	0.709772	0.542428
rnr1Y285A_msh3	0.36524	0.431519	0.298548	0.461365	0.389774	0.268305	0.432822	0.55346	1	0.372599	0.489371	0.810843	0.473644	0.643738	0.573835	0.475351	0.714082	0.345023	0.490686	0.200186	0.436317	0.538017	0.42086
rnr1Y285A_msh6	0.553464	0.371466	0.58306	0.537387	0.319714	0.498584	0.473672	0.774302	0.372599	1	0.669056	0.372221	0.597254	0.718246	0.673932	0.711595	0.414954	0.749523	0.72401	0.693635	0.618551	0.649134	0.493255
rnr1Y285A_pGAL_msh2	0.731426	0.523756	0.64809	0.765805	0.514008	0.622655	0.561911	0.75567	0.489371	0.669056	1	0.489772	0.529529	0.684518	0.62171	0.746454	0.562059	0.652528	0.815342	0.631878	0.681266	0.670802	0.608299
rnr1Y285A_pGAL_msh3	0.362972	0.457531	0.309242	0.436491	0.427972	0.261815	0.420989	0.566402	0.810843	0.372221	0.489772	1	0.513409	0.634979	0.583934	0.468255	0.680187	0.363348	0.504172	0.238757	0.444005	0.549752	0.415709
rnr1Y285A_pGAL_msh6	0.40874	0.365876	0.4366	0.391698	0.323531	0.362482	0.364085	0.670703	0.473644	0.597254	0.529529	0.513409	1	0.797705	0.801072	0.605603	0.521279	0.593018	0.587869	0.563216	0.549073	0.642959	0.400807
rnr1Y285A_pGAL	0.533962	0.457803	0.52105	0.567169	0.418721	0.481451	0.522928	0.782598	0.643738	0.718246	0.684518	0.634979	0.797705	1	0.837566	0.70501	0.634251	0.668854	0.721318	0.614563	0.680012	0.756631	0.533201
rnr1Y285A	0.507093	0.463087	0.534824	0.50396	0.423806	0.471366	0.513754	0.74859	0.573835	0.673932	0.62171	0.583934	0.801072	0.837566	1	0.694869	0.632184	0.682268	0.670748	0.593674	0.679752	0.767518	0.540691
rnr1Y285F_msh2	0.679273	0.482661	0.665779	0.672493	0.468191	0.564437	0.501867	0.819566	0.475351	0.711595	0.746454	0.468255	0.605603	0.70501	0.694869	1	0.556295	0.768804	0.834735	0.727533	0.669483	0.682498	0.553869
rnr1Y285F_msh3	0.449931	0.511701	0.376719	0.464328	0.510546	0.343947	0.445405	0.595249	0.714082	0.414954	0.562059	0.680187	0.521279	0.634251	0.632184	0.556295	1	0.408084	0.57846	0.324303	0.523754	0.592944	0.470214
rnr1Y285F_msh6	0.59296	0.368516	0.668761	0.562259	0.315903	0.581373	0.489748	0.738436	0.345023	0.749523	0.652528	0.363348	0.593018	0.668854	0.682268	0.768804	0.408084	1	0.738271	0.777314	0.63704	0.692257	0.532095
rnr1Y285F_pGAL_msh2	0.730248	0.528076	0.673463	0.741778	0.529729	0.625068	0.521007	0.827976	0.490686	0.72401	0.815342	0.504172	0.587869	0.721318	0.670748	0.834735	0.57846	0.738271	1	0.705163	0.702041	0.687006	0.594647
rnr1Y285F_pGAL_msh6	0.590717	0.353343	0.676753	0.553611	0.314295	0.607031	0.43778	0.685942	0.200186	0.693635	0.631878	0.238757	0.563216	0.614563	0.593674	0.727533	0.324303	0.777314	0.705163	1	0.619865	0.613161	0.498812
rnr1Y285F_pGAL	0.633355	0.577603	0.657392	0.609458	0.522343	0.617975	0.612191	0.689432	0.436317	0.618551	0.681266	0.444005	0.549073	0.680012	0.679752	0.669483	0.523754	0.63704	0.702041	0.619865	1	0.757982	0.688162
rnr1Y285F	0.605651	0.517817	0.634175	0.630391	0.453352	0.589806	0.59827	0.709772	0.538017	0.649134	0.670802	0.549752	0.642959	0.756631	0.767518	0.682498	0.592944	0.692257	0.687006	0.613161	0.757982	1	0.672549
WT	0.633455	0.602398	0.66576	0.630673	0.562719	0.6149	0.663908	0.542428	0.42086	0.493255	0.608299	0.415709	0.400807	0.533201	0.540691	0.553869	0.470214	0.532095	0.594647	0.498812	0.688162	0.672549	1

## Sheet: ST15. msh2 susceptible
Table S15. msh2D susceptible positions
Fraction of biological replicates mutated									Mean frequency by genotype
Group.2	msh2	rnr1D57N_msh2	rnr1Y285A_msh2	rnr1Y285A_pGAL_msh2	rnr1Y285F_msh2	rnr1Y285F_pGAL_msh2	WT		Group.2	msh2	rnr1D57N_msh2	rnr1Y285A_msh2	rnr1Y285A_pGAL_msh2	rnr1Y285F_msh2	rnr1Y285F_pGAL_msh2	WT	msh2/WT ratio
32166-SNV-C-T	0.75	1	0.285714	0.5	0.25	0.833333	0		32166-SNV-C-T	0.578225	0.32825	2.47681	0.884824	0.295293	0.455811	0	#DIV/0!
31981-SNV-G-T	0.75	0	0	0	0.75	0.166667	0		31981-SNV-G-T	0.145296	0	0	0	0.403884	0.286115	0	#DIV/0!
32707-Deletion-C--	1	1	1	1	1	1	0.222222		32707-Deletion-C--	6.88739	0.511353	1.05048	0.704752	4.58166	0.868181	0.186765	36.8772
32498-Deletion-T--	1	1	0.857143	1	1	1	0.888889		32498-Deletion-T--	18.3723	6.2108	1.35652	7.56401	6.95304	3.21516	0.597775	30.7344
32274-SNV-G-T	1	0	0.428571	0.5	1	1	0.111111		32274-SNV-G-T	1.9941	0	0.539713	0.118292	0.301473	0.470903	0.144725	13.7786
32081-Deletion-A--	1	1	0.714286	1	1	1	0.666667		32081-Deletion-A--	5.76493	7.91575	0.560432	5.3123	7.57384	0.788432	0.759634	7.58909
33000-Deletion-A--	1	1	0.428571	0.75	0.5	0.5	0.222222		33000-Deletion-A--	3.37406	1.00364	0.444798	0.871629	0.302261	0.404278	0.685827	4.91969
32842-Deletion-A--	1	1	1	1	1	1	1		32842-Deletion-A--	8.11059	17.5494	4.98912	4.45407	3.61271	11.6345	1.65791	4.89205
31913-Deletion-A--	0.75	0.25	0.142857	0.5	0	0	0.222222		31913-Deletion-A--	0.545181	0.131628	0.129849	0.387861	0	0	0.123634	4.40963
32924-Deletion-A--	1	1	0.428571	0.75	0.75	0.666667	0.444444		32924-Deletion-A--	2.07276	1.23176	0.245085	2.45176	0.211718	0.16955	0.603041	3.43717
32487-SNV-C-T	1	1	0.571429	1	0.75	0.833333	0.333333		32487-SNV-C-T	1.03012	0.323086	1.19219	0.393661	0.474163	0.293109	0.303095	3.39867
31863-Deletion-A--	1	1	0.142857	0.75	0.75	1	0.444444		31863-Deletion-A--	0.623007	0.537657	1.60913	1.08356	0.176364	0.308131	0.206321	3.0196
32958-SNV-C-T	1	0.5	0.714286	1	1	1	0.444444		32958-SNV-C-T	0.992357	0.142522	0.90323	1.82774	0.98514	0.860991	0.342453	2.89779
33204-SNV-A-C	1	0.75	0.142857	0.75	0.5	0.833333	0.555556		33204-SNV-A-C	1.6611	0.23585	0.220014	0.340924	0.402244	0.132721	0.580063	2.86365
32842-Insertion---A	1	1	0.714286	0.75	1	1	0.888889		32842-Insertion---A	3.25637	9.58792	1.0624	4.76546	0.427208	2.11354	1.1859	2.74591
32490-Deletion-A--	1	1	0.714286	1	1	1	0.222222		32490-Deletion-A--	2.43938	1.83784	0.477755	1.92677	1.77231	2.21154	0.954818	2.55481
32970-SNV-C-T	0.75	1	0.428571	1	0.75	1	0.222222		32970-SNV-C-T	1.09405	0.666872	0.75099	0.700433	2.17655	0.917278	0.461164	2.37237
32256-SNV-A-G	0.75	0	0	0	0	0	0.111111		32256-SNV-A-G	0.613954	0	0	0	0	0	0.266218	2.30621
32940-SNV-G-T	1	0.75	1	1	1	1	0.444444		32940-SNV-G-T	0.374908	0.219827	3.47167	7.76755	8.75686	4.81803	0.167126	2.24326
32631-Deletion-T--	1	1	0.142857	0.75	0.75	0.833333	0.111111		32631-Deletion-T--	0.627675	8.76284	0.232597	0.724563	0.260944	0.383607	0.289487	2.16823
32081-Insertion---A	1	1	0.857143	1	1	1	0.666667		32081-Insertion---A	1.34589	5.66507	0.763556	1.34134	0.358747	0.825097	0.623425	2.15886
33153-SNV-C-T	0.75	0.75	0.857143	1	1	1	0.111111		33153-SNV-C-T	0.406929	0.1771	2.51758	1.07245	2.45872	4.47235	0.219444	1.85436
32631-Insertion---T	0.75	0.5	0.142857	0.25	0	0.166667	0.222222		32631-Insertion---T	0.278257	0.224408	0.367394	0.133028	0	0.161523	0.155477	1.7897
32075-SNV-C-T	0.75	1	1	1	1	1	0.333333		32075-SNV-C-T	0.794313	5.55452	5.29038	3.08992	4.87497	4.69453	0.513829	1.54587
32488-SNV-G-T	0.75	0.25	0.285714	0.25	0.25	0.5	0.111111		32488-SNV-G-T	0.33295	0.110011	0.4381	0.14726	0.675141	0.454878	0.219411	1.51747
32373-SNV-G-T	0.75	0	0.285714	0	1	0.166667	0.111111		32373-SNV-G-T	0.180881	0	0.703136	0	0.413394	0.123755	0.122328	1.47865
32945-SNV-C-T	0.75	1	1	1	1	1	0.222222		32945-SNV-C-T	0.519224	0.177968	1.72595	0.729787	2.52868	2.64109	0.371206	1.39875
32089-SNV-C-A	1	0.75	0.857143	1	1	1	0.111111		32089-SNV-C-A	0.608293	0.399753	1.1079	0.639295	1.40481	0.824077	0.488087	1.24628
32901-SNV-C-T	1	0.75	0.714286	1	0.75	0.833333	0.888889		32901-SNV-C-T	0.235093	0.218895	0.192516	0.211522	0.23899	0.227367	0.191308	1.22887
33168-SNV-C-T	1	0.25	0.571429	0.5	1	1	0.111111		33168-SNV-C-T	0.208313	0.318878	2.6145	0.237249	0.541793	0.751129	0.172427	1.20812
32088-SNV-C-T	0.75	1	1	1	1	1	0.222222		32088-SNV-C-T	0.362853	0.176266	1.58319	0.638921	0.920605	1.70552	0.311969	1.1631
32728-Insertion---A	0.75	0.75	0.714286	0.5	0.75	0.666667	0.222222		32728-Insertion---A	0.398215	0.315215	0.611167	0.664755	0.821803	0.39307	0.345442	1.15277
33276-SNV-G-A	0.75	0.5	0.857143	0.5	1	0.5	0.222222		33276-SNV-G-A	0.187121	0.234614	0.209481	0.245802	0.202795	0.21949	0.16643	1.12433
33476-SNV-T-C	0.75	0.75	0.428571	0.5	0.75	0.5	0.555556		33476-SNV-T-C	0.170584	0.178185	0.138923	0.151787	0.149853	0.17073	0.162235	1.05146
32536-SNV-C-T	1	1	0.571429	0.75	1	1	0.888889		32536-SNV-C-T	0.144517	0.16842	0.158608	0.146892	0.199489	0.146825	0.153106	0.943903
31723-Deletion-A--	0.75	0.5	0.428571	0.5	0.25	0.5	0.444444		31723-Deletion-A--	0.138723	0.128994	0.126305	0.149984	0.177105	0.119336	0.149936	0.925211
32679-SNV-C-T	0.75	0.75	0.142857	0.5	0.25	0.833333	0.444444		32679-SNV-C-T	0.183743	0.37856	0.111197	0.54904	0.367349	0.330488	0.212095	0.866322
32728-Deletion-A--	1	1	0.571429	1	1	1	0.222222		32728-Deletion-A--	5.0428	3.03394	0.736063	4.2577	2.17963	1.17511	7.3472	0.686357
32449-SNV-C-T	0.75	0.75	0	0.5	0	0	0.333333		32449-SNV-C-T	0.244455	0.237251	0	0.303764	0	0	0.362612	0.674149
32941-Deletion-A--	1	1	0.142857	0.5	0.25	1	0.111111		32941-Deletion-A--	0.302273	0.230533	0.343211	0.337721	0.436734	0.347106	0.478056	0.632297
32797-SNV-C-T	0.75	1	0	0.25	0	0.333333	0.444444		32797-SNV-C-T	0.243229	0.881674	0	0.195857	0	0.187119	0.399251	0.609213
32498-Insertion---T	0.75	1	0.142857	0.25	0.25	0.5	0.111111		32498-Insertion---T	0.283694	0.398256	0.568613	1.44546	0.325696	0.815235	0.469469	0.604288
32855-SNV-C-T	1	1	0.714286	0.5	1	1	0.555556		32855-SNV-C-T	0.320244	0.539318	1.73112	0.470917	0.664527	1.37009	0.748653	0.42776
32399-SNV-G-T	0.75	0	0	0.25	0	0	0.555556		32399-SNV-G-T	0.230058	0	0	0.315557	0	0	0.542512	0.42406
32760-Deletion-A--	0.75	0.25	0.571429	0.75	0.5	0.666667	0.111111		32760-Deletion-A--	0.317572	0.208676	21.7433	0.332834	0.601391	0.56883	0.9758	0.325447
33154-SNV-C-A	1	1	1	1	1	1	0.222222		33154-SNV-C-A	1.03397	1.45679	1.70894	1.63303	4.83033	5.45019	3.62974	0.284862
32917-SNV-C-T	0.75	0.5	0.714286	0.25	0.75	1	0.333333		32917-SNV-C-T	0.147685	0.203186	0.958212	0.406704	1.25084	0.593051	0.80585	0.183266
32530-SNV-G-T	1	0.75	0.285714	0.75	1	1	0.333333		32530-SNV-G-T	2.262	0.248541	0.391175	1.13857	0.605158	0.577215	19.9402	0.113439
32114-SNV-C-T	0.75	1	0.857143	1	1	0.5	0.555556		32114-SNV-C-T	0.393125	0.576264	1.49583	0.498911	2.90179	1.76029	11.5708	0.0339756

## Sheet: ST16. msh3 susceptible
Table S16. msh3D susceptible position6
Fraction of biological replicates mutated								Mean frequency by genotype
Group.2	msh3	rnr1D57N_msh3	rnr1Y285A_msh3	rnr1Y285A_pGAL_msh3	rnr1Y285F_msh3	WT		Group.2	msh3	rnr1D57N_msh3	rnr1Y285A_msh3	rnr1Y285A_pGAL_msh3	rnr1Y285F_msh3	WT	msh3/WT ratio
32842-Deletion-A--	1	1	0.75	0.75	1	1		32842-Deletion-A--	6.07718	2.96233	0.157769	0.184572	1.72887	1.65791	3.66556
32707-Deletion-C--	0.666667	1	1	1	1	0.222222		32707-Deletion-C--	0.573184	1.82814	10.1253	11.3822	4.90501	0.186765	3.069
32498-Deletion-T--	1	1	0.5	0.5	1	0.888889		32498-Deletion-T--	1.71189	1.17795	0.152243	0.150979	0.24122	0.597775	2.86377
32081-Deletion-A--	1	1	0.5	0.5	0.5	0.666667		32081-Deletion-A--	1.82552	0.809074	0.122722	0.123654	0.111753	0.759634	2.40316
31863-Deletion-A--	0.5	0.5	0	0	0	0.444444		31863-Deletion-A--	0.299917	0.466019	0	0	0	0.206321	1.45364
32901-SNV-C-T	0.833333	0.75	0.75	1	1	0.888889		32901-SNV-C-T	0.224469	0.202853	0.224084	0.211161	0.205327	0.191308	1.17334
32536-SNV-C-T	0.833333	0.75	1	1	1	0.888889		32536-SNV-C-T	0.140322	0.128974	0.127849	0.155627	0.140575	0.153106	0.9165
33000-Deletion-A--	0.5	0.25	0.25	0	0.25	0.222222		33000-Deletion-A--	0.51407	0.176598	1.36716	0	0.352294	0.685827	0.749562
32487-SNV-C-T	0.833333	0.25	0	0.25	0.25	0.333333		32487-SNV-C-T	0.163298	0.11103	0	0.121823	0.135135	0.303095	0.538767
32256-SNV-A-G	0.5	0.25	0	0	0	0.111111		32256-SNV-A-G	0.137419	0.117438	0	0	0	0.266218	0.516191
32797-SNV-C-T	0.666667	0.25	0	0	0	0.444444		32797-SNV-C-T	0.187364	0.132778	0	0	0	0.399251	0.469288
32842-Insertion---A	0.5	0.75	0	0	0.25	0.888889		32842-Insertion---A	0.51611	0.446901	0	0	0.114601	1.1859	0.435206
32399-SNV-G-T	0.5	0	0	0	0	0.555556		32399-SNV-G-T	0.225455	0	0	0	0	0.542512	0.415576
32081-Insertion---A	0.666667	0.5	0	0	0	0.666667		32081-Insertion---A	0.207521	0.328193	0	0	0	0.623425	0.332872
32490-Deletion-A--	0.5	0.75	0	0	0.25	0.222222		32490-Deletion-A--	0.306976	0.254797	0	0	0.532481	0.954818	0.321502
32855-SNV-C-T	0.5	0.5	0.25	0	0	0.555556		32855-SNV-C-T	0.23812	1.12386	0.117704	0	0	0.748653	0.318065
32917-SNV-C-T	0.666667	0.25	0	0.5	0	0.333333		32917-SNV-C-T	0.147413	0.351449	0	1.64766	0	0.80585	0.182928
32728-Deletion-A--	0.666667	0.75	0	0	0	0.222222		32728-Deletion-A--	0.500901	0.539104	0	0	0	7.3472	0.0681758

## Sheet: ST17. msh6 susceptible
Table S17. msh6D susceptible positions
Fraction of biological replicates mutated									Mean frequency by genotype
Group.2	msh6	rnr1D57N_msh6	rnr1Y285A_msh6	rnr1Y285A_pGAL_msh6	rnr1Y285F_msh6	rnr1Y285F_pGAL_msh6	WT		Group.2	msh6	rnr1D57N_msh6	rnr1Y285A_msh6	rnr1Y285A_pGAL_msh6	rnr1Y285F_msh6	rnr1Y285F_pGAL_msh6	WT	msh6/WT ratio
33099-SNV-A-C	1	1	0.2	0	0	0	0		33099-SNV-A-C	0.663558	0.607926	0.314517	0	0	0	0	#DIV/0!
32166-SNV-C-T	1	1	0.2	0	0.25	0.5	0		32166-SNV-C-T	0.551273	1.30273	4.18349	0	1.33021	0.181485	0	#DIV/0!
33199-SNV-G-A	1	0.5	0.6	0	0.75	0.75	0		33199-SNV-G-A	0.387275	0.429055	0.621041	0	0.386842	0.973788	0	#DIV/0!
32660-SNV-C-T	1	0.75	0	0.25	0.25	0.25	0		32660-SNV-C-T	0.382927	1.2647	0	0.193759	0.458104	0.821	0	#DIV/0!
32529-SNV-G-T	0.75	0.5	0.4	0	1	0	0		32529-SNV-G-T	0.358694	0.365804	0.15789	0	0.763796	0	0	#DIV/0!
33153-SNV-C-A	0.75	0.5	1	1	1	1	0		33153-SNV-C-A	0.318158	0.266047	4.17638	1.33044	1.48789	3.19509	0	#DIV/0!
32463-SNV-G-T	0.75	0.25	0	0.25	0.25	0	0		32463-SNV-G-T	0.293215	0.117375	0	0.231966	0.340727	0	0	#DIV/0!
33204-SNV-A-G	0.75	0	0	0	0	0.25	0		33204-SNV-A-G	0.280538	0	0	0	0	4.55209	0	#DIV/0!
33025-SNV-G-T	0.75	0	0	0	0	0	0		33025-SNV-G-T	0.241078	0	0	0	0	0	0	#DIV/0!
32811-SNV-G-T	0.75	0	0	0	0.25	0	0		32811-SNV-G-T	0.236476	0	0	0	0.119729	0	0	#DIV/0!
32568-SNV-G-A	0.75	0.5	0.6	0	0.75	0.25	0		32568-SNV-G-A	0.208091	0.164636	0.13867	0	1.13628	0.162048	0	#DIV/0!
32097-SNV-C-T	0.75	0.5	0	0	0	0	0		32097-SNV-C-T	0.206758	0.214187	0	0	0	0	0	#DIV/0!
32544-SNV-C-T	0.75	0.25	0	0	0	0	0		32544-SNV-C-T	0.170619	0.500101	0	0	0	0	0	#DIV/0!
32970-SNV-C-T	1	1	0.2	0	1	0.75	0.222222		32970-SNV-C-T	12.1359	2.54773	0.469838	0	0.588403	0.433752	0.461164	26.3158
32679-SNV-C-T	1	1	0	0	0.25	0.5	0.444444		32679-SNV-C-T	4.39286	1.39274	0	0	0.378047	0.310339	0.212095	20.7117
33168-SNV-C-T	1	1	0.4	0.25	1	1	0.111111		33168-SNV-C-T	2.39091	0.6034	0.361328	0.21155	1.29813	0.649912	0.172427	13.8662
33114-SNV-C-T	1	1	0.8	0.25	1	0.75	0.555556		33114-SNV-C-T	1.6022	1.18608	0.218139	0.127799	0.225421	0.242795	0.180262	8.88815
32188-SNV-C-A	0.75	0.75	1	1	1	1	0.444444		32188-SNV-C-A	1.70669	0.361377	5.39597	0.47447	3.41856	2.2106	0.311029	5.48725
32373-SNV-G-T	1	0	0.2	0.25	0.75	1	0.111111		32373-SNV-G-T	0.643014	0	0.120656	0.223479	0.340345	0.233686	0.122328	5.25646
32680-SNV-A-G	0.75	1	0	0	0	0.5	0.444444		32680-SNV-A-G	1.133	0.538119	0	0	0	2.17054	0.239055	4.73948
32707-Deletion-C--	0.75	0.5	0	1	0	0	0.222222		32707-Deletion-C--	0.866348	0.334009	0	4.98419	0	0	0.186765	4.6387
33024-SNV-G-T	0.75	0.75	0.4	0.25	0	0.75	0.222222		33024-SNV-G-T	1.04816	0.412088	0.218937	0.120482	0	0.981115	0.227014	4.61716
32487-SNV-C-T	1	1	0.8	0.25	1	0.75	0.333333		32487-SNV-C-T	1.39675	11.0885	0.341002	0.151998	0.86338	0.475142	0.303095	4.60827
32075-SNV-C-T	1	1	1	0.75	1	1	0.333333		32075-SNV-C-T	2.22765	2.61159	4.45337	0.542991	7.79673	7.61655	0.513829	4.33539
33112-SNV-G-T	1	0.5	0.2	0	0.25	0.5	0.111111		33112-SNV-G-T	0.75793	1.71458	0.116786	0	0.188142	0.346012	0.180251	4.20486
32658-SNV-C-T	1	0.5	0	0.25	0.75	0.5	0.333333		32658-SNV-C-T	0.756124	3.55467	0	0.293109	0.18653	0.316767	0.189772	3.98437
32488-SNV-G-T	1	0.25	0.4	0	0.25	0.25	0.111111		32488-SNV-G-T	0.869894	0.135153	0.21851	0	0.207108	0.159243	0.219411	3.96468
32940-SNV-G-T	1	1	1	0.5	1	1	0.444444		32940-SNV-G-T	0.640695	1.83876	1.60431	0.167784	11.4932	5.44453	0.167126	3.8336
33159-SNV-C-T	1	1	0.6	0.25	0.25	0.75	0.111111		33159-SNV-C-T	0.564055	1.22578	0.37525	0.255612	0.858742	0.516896	0.148914	3.78778
33153-SNV-C-T	1	1	1	1	1	1	0.111111		33153-SNV-C-T	0.805283	0.523392	3.36711	0.696712	3.79426	3.83939	0.219444	3.66965
32088-SNV-C-T	1	1	1	0.75	1	1	0.222222		32088-SNV-C-T	1.13884	0.407812	1.8589	0.327833	2.68887	2.01031	0.311969	3.65049
32958-SNV-C-T	1	1	1	0.25	1	1	0.444444		32958-SNV-C-T	1.20763	2.22705	1.22117	0.403777	9.57659	1.36398	0.342453	3.52642
32089-SNV-C-A	1	1	1	0.25	1	0.75	0.111111		32089-SNV-C-A	1.49284	5.33864	1.47711	0.267118	0.943413	4.47038	0.488087	3.05854
33238-SNV-C-A	1	1	0.2	0	0	0.75	0.222222		33238-SNV-C-A	0.911548	0.408412	0.123567	0	0	0.644951	0.301176	3.02662
33171-SNV-C-T	1	1	0	0	0	0.75	0.333333		33171-SNV-C-T	0.775308	0.73305	0	0	0	0.33219	0.259883	2.9833
32938-SNV-A-G	1	0.75	0	0	0	0	0.111111		32938-SNV-A-G	0.530327	0.520704	0	0	0	0	0.177977	2.97974
32256-SNV-A-G	1	0.5	0	0	0	0	0.111111		32256-SNV-A-G	0.73698	0.252841	0	0	0	0	0.266218	2.76833
33177-SNV-G-T	1	0.5	0.4	0	1	0.25	0.111111		33177-SNV-G-T	0.476296	3.3612	0.47897	0	0.414666	0.139308	0.176969	2.6914
32917-SNV-C-A	0.75	0.75	1	1	1	1	0.222222		32917-SNV-C-A	0.613618	0.42684	2.26644	5.94137	1.75439	0.508591	0.243043	2.52473
32271-SNV-C-T	1	1	0.6	0.5	1	0.75	0.555556		32271-SNV-C-T	0.606782	0.385758	0.286887	0.321705	0.443613	0.329631	0.250918	2.41825
33056-SNV-C-T	0.75	0.5	0.4	0	1	0	0.555556		33056-SNV-C-T	0.328872	0.152295	0.150183	0	0.144599	0	0.139275	2.36131
32947-SNV-A-G	0.75	0	0	0	0	0	0.111111		32947-SNV-A-G	0.29101	0	0	0	0	0	0.125592	2.31711
32797-SNV-C-T	1	1	0.2	0	0.25	0.25	0.444444		32797-SNV-C-T	0.902005	0.631845	0.169166	0	0.564846	0.233635	0.399251	2.25924
32572-SNV-C-A	0.75	0.75	0.2	0.25	0.75	0.5	0.111111		32572-SNV-C-A	0.292604	0.316685	0.4467	0.382791	0.486905	0.581702	0.130908	2.23519
32205-SNV-C-T	1	0.75	0	0	0.75	0.5	0.111111		32205-SNV-C-T	0.524001	0.868068	0	0	0.350559	0.831577	0.238603	2.19612
32041-SNV-G-A	1	1	0.2	0	0.5	0.5	0.333333		32041-SNV-G-A	0.416178	0.684478	0.174551	0	0.169234	0.556769	0.192869	2.15783
32259-SNV-C-T	0.75	0	0.4	0.25	0.75	0.75	0.222222		32259-SNV-C-T	0.355774	0	0.326677	0.137179	0.695182	0.249001	0.166113	2.14176
32780-SNV-C-T	1	1	0.2	0	0.25	0	0.222222		32780-SNV-C-T	0.296365	0.482951	0.255888	0	0.133428	0	0.144445	2.05175
33436-SNV-C-A	1	0.5	0	0	0.25	0.5	0.111111		33436-SNV-C-A	0.319039	0.314718	0	0	0.356843	0.830568	0.156513	2.03843
33169-SNV-C-A	0.75	0	0.2	0	0.25	0.25	0.111111		33169-SNV-C-A	0.518828	0	0.121286	0	0.30842	0.243747	0.262535	1.97622
32474-SNV-G-T	1	0.5	0	0	0	0.75	0.111111		32474-SNV-G-T	0.637501	0.600774	0	0	0	0.284958	0.352508	1.80847
33204-SNV-A-C	1	0.5	0.4	0	0.5	0.25	0.555556		33204-SNV-A-C	1.03672	0.387049	0.903743	0	0.869786	0.319285	0.580063	1.78725
32566-SNV-C-T	0.75	0.75	0	0	0.5	0.5	0.222222		32566-SNV-C-T	0.319359	0.14245	0	0	0.297876	0.130619	0.178738	1.78674
31844-SNV-C-T	0.75	1	1	0.5	1	1	0.222222		31844-SNV-C-T	0.735943	0.961299	0.842494	0.224307	0.938958	0.763344	0.412298	1.78498
32498-Deletion-T--	1	1	0.8	0	0.5	0.5	0.888889		32498-Deletion-T--	0.949399	0.967822	1.37487	0	0.323412	0.768891	0.597775	1.58822
32449-SNV-C-T	0.75	1	0	0	0.25	0.75	0.333333		32449-SNV-C-T	0.534392	1.09403	0	0	0.339729	0.250412	0.362612	1.47373
32945-SNV-C-T	1	1	1	0.5	1	1	0.222222		32945-SNV-C-T	0.541661	0.572711	4.28208	0.516351	9.50974	6.47372	0.371206	1.45919
33154-SNV-C-A	1	1	1	0.25	1	1	0.222222		33154-SNV-C-A	5.16757	1.06133	6.91257	0.252366	5.65016	3.81197	3.62974	1.42367
33276-SNV-G-A	0.75	0.75	0.6	0	1	0	0.222222		33276-SNV-G-A	0.221416	0.195533	0.189982	0	0.21249	0	0.16643	1.33039
32936-SNV-C-T	0.75	0.75	0.2	0	0.5	0.25	0.111111		32936-SNV-C-T	0.313107	0.542229	0.159409	0	1.224	1.11088	0.237342	1.31922
32445-SNV-A-G	1	0	0.2	0	0	0	0.333333		32445-SNV-A-G	0.390259	0	0.179845	0	0	0	0.298369	1.30797
32917-SNV-C-T	0.75	0.75	0.4	0	1	1	0.333333		32917-SNV-C-T	1.04267	0.63278	0.318511	0	0.520409	0.791378	0.80585	1.29388
32856-SNV-C-T	1	0.25	0	0	0	0.25	0.111111		32856-SNV-C-T	0.49021	0.406905	0	0	0	0.11265	0.383315	1.27887
32842-Deletion-A--	1	1	0.8	0.75	1	0.75	1		32842-Deletion-A--	2.11332	0.885761	1.36756	0.427595	0.374126	0.516448	1.65791	1.27469
32901-SNV-C-T	1	0.5	0.6	1	0.75	0.75	0.888889		32901-SNV-C-T	0.22863	0.195833	0.188207	0.207727	0.191171	0.353993	0.191308	1.19509
32609-SNV-C-T	1	1	0	0.25	0.75	0.25	0.111111		32609-SNV-C-T	0.428219	1.80017	0	1.3034	0.133669	0.659185	0.361046	1.18605
33474-SNV-C-A	1	0.5	0.6	0.25	1	0.25	0.666667		33474-SNV-C-A	0.317057	0.335371	0.295379	0.244106	0.288082	0.243754	0.271086	1.16958
32842-Insertion---A	1	1	0.6	0.25	0.75	0.75	0.888889		32842-Insertion---A	1.38329	2.92227	0.204258	0.1372	0.162378	0.85203	1.1859	1.16645
33078-SNV-C-T	0.75	0	0.2	0.25	0.25	0.25	0.222222		33078-SNV-C-T	0.17517	0	0.264487	2.66363	0.829755	0.110263	0.150718	1.16223
32299-SNV-C-T	1	0.25	0.6	0.5	0.25	0.25	0.333333		32299-SNV-C-T	0.212283	0.193753	0.223867	0.188923	0.213789	0.181992	0.191587	1.10803
32535-SNV-G-A	1	0.75	0.8	1	0.75	0.75	0.777778		32535-SNV-G-A	0.142711	0.147809	0.131438	0.133055	0.129412	0.119825	0.129191	1.10465
33070-SNV-C-T	0.75	0.5	0.8	0.25	0.75	0	0.222222		33070-SNV-C-T	0.143048	0.132847	0.13403	0.129894	0.141348	0	0.130372	1.09723
33310-SNV-G-A	0.75	0.75	0.4	0.25	0.5	0.25	0.555556		33310-SNV-G-A	0.150398	0.142908	0.138618	0.12846	0.127372	0.118073	0.139366	1.07916
32590-SNV-C-T	0.75	0.25	0.6	0	0.25	0	0.111111		32590-SNV-C-T	0.208313	0.215128	0.200177	0	0.226983	0	0.202614	1.02813
32529-SNV-G-A	1	0	0	0	0	0.25	0.222222		32529-SNV-G-A	0.237402	0	0	0	0	0.127394	0.234446	1.01261
33476-SNV-T-C	1	0.5	0	0.75	1	1	0.555556		33476-SNV-T-C	0.163633	0.197164	0	0.164788	0.187678	0.142726	0.162235	1.00862
32855-SNV-C-T	1	1	1	0.5	1	1	0.555556		32855-SNV-C-T	0.723026	4.03319	0.59542	0.217226	1.48974	1.1393	0.748653	0.96577
32081-Insertion---A	1	1	0.2	0.25	0.5	0.25	0.666667		32081-Insertion---A	0.583533	0.321462	0.109857	2.31922	0.670614	0.190554	0.623425	0.936011
33111-SNV-G-A	0.75	0	0	0	0	0	0.222222		33111-SNV-G-A	0.176506	0	0	0	0	0	0.190043	0.928771
32536-SNV-C-T	1	0.75	0.6	1	1	0.25	0.888889		32536-SNV-C-T	0.141296	0.137654	0.153534	0.139531	0.154498	0.115675	0.153106	0.922867
32734-SNV-A-G	0.75	1	0.2	0	0	0	0.222222		32734-SNV-A-G	0.231459	0.205266	0.268527	0	0	0	0.25124	0.921266
33235-SNV-C-A	0.75	0	0.2	0	0.25	0.5	0.111111		33235-SNV-C-A	0.281214	0	0.174122	0	0.202911	0.750071	0.316064	0.889736
32940-SNV-G-A	0.75	0.5	0	0.25	0.75	0.5	0.222222		32940-SNV-G-A	0.212583	0.649224	0	0.211146	0.300916	0.222696	0.252769	0.841019
32796-SNV-C-T	1	1	0.2	0	0	0	0.111111		32796-SNV-C-T	0.696415	0.910131	0.275457	0	0	0	0.852199	0.817198
32924-Deletion-A--	1	0	0.4	0	0	0	0.444444		32924-Deletion-A--	0.483802	0	0.109777	0	0	0	0.603041	0.80227
33325-SNV-C-A	0.75	0.75	1	0.75	1	1	0.222222		33325-SNV-C-A	0.293956	0.989411	0.603047	1.40713	1.41061	1.04246	0.378735	0.776152
31869-SNV-G-T	0.75	0.25	0	0	0.5	0.25	0.222222		31869-SNV-G-T	0.554941	0.122289	0	0	0.46937	0.131637	0.759932	0.73025
33151-SNV-G-T	0.75	0	0.6	0.5	1	0.5	0.555556		33151-SNV-G-T	0.181488	0	0.240901	2.25967	0.264394	0.112361	0.269443	0.673566
32749-SNV-C-T	1	1	0	0	0	0	0.444444		32749-SNV-C-T	0.229053	0.410595	0	0	0	0	0.347178	0.659757
32081-Deletion-A--	0.75	1	0.8	0	0.5	0	0.666667		32081-Deletion-A--	0.492811	0.327	0.523224	0	0.245515	0	0.759634	0.648748
32490-SNV-A-G	0.75	0.5	0.2	0	0	0	0.333333		32490-SNV-A-G	0.197537	0.310486	0.1287	0	0	0	0.392418	0.503385
33055-SNV-G-A	1	0.75	0	0	0	0.25	0.444444		33055-SNV-G-A	0.245512	0.627143	0	0	0	0.165989	0.838577	0.292773
32058-SNV-G-T	0.75	0	0.4	0	0.5	0.25	0.222222		32058-SNV-G-T	0.283311	0	0.134751	0	0.281918	2.61331	1.01594	0.278866
32728-Deletion-A--	1	0.75	0	0	0	0.25	0.222222		32728-Deletion-A--	1.33578	0.435323	0	0	0	0.345867	7.3472	0.181808
32114-SNV-C-T	1	0.75	0.8	1	1	1	0.555556		32114-SNV-C-T	1.57207	1.23624	1.47665	0.44574	3.77956	7.30332	11.5708	0.135865
32530-SNV-G-T	1	0.5	0.8	0.25	1	1	0.333333		32530-SNV-G-T	1.81105	0.427905	0.288968	0.288809	1.59874	2.19882	19.9402	0.0908241
31806-SNV-C-T	0.75	0.5	0	0	0	0	0.444444		31806-SNV-C-T	0.26422	0.350272	0	0	0	0	3.98727	0.0662658

## Sheet: ST18. Summary of susceptible
Table S18. Summary of susceptible positions in msh mutants
Group.2	msh2		Group.2	msh3		Group.2	msh6
32166-SNV-C-T	0.578225		32842-Deletion-A--	6.07718		33099-SNV-A-C	0.663558
31981-SNV-G-T	0.145296		32707-Deletion-C--	0.573184		32166-SNV-C-T	0.551273
32707-Deletion-C--	6.88739		32498-Deletion-T--	1.71189		33199-SNV-G-A	0.387275
32498-Deletion-T--	18.3723		32081-Deletion-A--	1.82552		32660-SNV-C-T	0.382927
32274-SNV-G-T	1.9941		31863-Deletion-A--	0.299917		32529-SNV-G-T	0.358694
32081-Deletion-A--	5.76493		32901-SNV-C-T	0.224469		33153-SNV-C-A	0.318158
33000-Deletion-A--	3.37406		32536-SNV-C-T	0.140322		32463-SNV-G-T	0.293215
32842-Deletion-A--	8.11059		33000-Deletion-A--	0.51407		33204-SNV-A-G	0.280538
31913-Deletion-A--	0.545181		32487-SNV-C-T	0.163298		33025-SNV-G-T	0.241078
32924-Deletion-A--	2.07276		32256-SNV-A-G	0.137419		32811-SNV-G-T	0.236476
32487-SNV-C-T	1.03012		32797-SNV-C-T	0.187364		32568-SNV-G-A	0.208091
31863-Deletion-A--	0.623007		32842-Insertion---A	0.51611		32097-SNV-C-T	0.206758
32958-SNV-C-T	0.992357		32399-SNV-G-T	0.225455		32544-SNV-C-T	0.170619
33204-SNV-A-C	1.6611		32081-Insertion---A	0.207521		32970-SNV-C-T	12.1359
32842-Insertion---A	3.25637		32490-Deletion-A--	0.306976		32679-SNV-C-T	4.39286
32490-Deletion-A--	2.43938		32855-SNV-C-T	0.23812		33168-SNV-C-T	2.39091
32970-SNV-C-T	1.09405		32917-SNV-C-T	0.147413		33114-SNV-C-T	1.6022
32256-SNV-A-G	0.613954		32728-Deletion-A--	0.500901		32188-SNV-C-A	1.70669
32940-SNV-G-T	0.374908					32373-SNV-G-T	0.643014
32631-Deletion-T--	0.627675					32680-SNV-A-G	1.133
32081-Insertion---A	1.34589					32707-Deletion-C--	0.866348
33153-SNV-C-T	0.406929					33024-SNV-G-T	1.04816
32631-Insertion---T	0.278257					32487-SNV-C-T	1.39675
32075-SNV-C-T	0.794313					32075-SNV-C-T	2.22765
32488-SNV-G-T	0.33295					33112-SNV-G-T	0.75793
32373-SNV-G-T	0.180881					32658-SNV-C-T	0.756124
32945-SNV-C-T	0.519224					32488-SNV-G-T	0.869894
32089-SNV-C-A	0.608293					32940-SNV-G-T	0.640695
32901-SNV-C-T	0.235093					33159-SNV-C-T	0.564055
33168-SNV-C-T	0.208313					33153-SNV-C-T	0.805283
32088-SNV-C-T	0.362853					32088-SNV-C-T	1.13884
32728-Insertion---A	0.398215					32958-SNV-C-T	1.20763
33276-SNV-G-A	0.187121					32089-SNV-C-A	1.49284
33476-SNV-T-C	0.170584					33238-SNV-C-A	0.911548
32536-SNV-C-T	0.144517					33171-SNV-C-T	0.775308
31723-Deletion-A--	0.138723					32938-SNV-A-G	0.530327
32679-SNV-C-T	0.183743					32256-SNV-A-G	0.73698
32728-Deletion-A--	5.0428					33177-SNV-G-T	0.476296
32449-SNV-C-T	0.244455					32917-SNV-C-A	0.613618
32941-Deletion-A--	0.302273					32271-SNV-C-T	0.606782
32797-SNV-C-T	0.243229					33056-SNV-C-T	0.328872
32498-Insertion---T	0.283694					32947-SNV-A-G	0.29101
32855-SNV-C-T	0.320244					32797-SNV-C-T	0.902005
32399-SNV-G-T	0.230058					32572-SNV-C-A	0.292604
32760-Deletion-A--	0.317572					32205-SNV-C-T	0.524001
33154-SNV-C-A	1.03397					32041-SNV-G-A	0.416178
32917-SNV-C-T	0.147685					32259-SNV-C-T	0.355774
32530-SNV-G-T	2.262					32780-SNV-C-T	0.296365
32114-SNV-C-T	0.393125					33436-SNV-C-A	0.319039
						33169-SNV-C-A	0.518828
						32474-SNV-G-T	0.637501
						33204-SNV-A-C	1.03672
						32566-SNV-C-T	0.319359
						31844-SNV-C-T	0.735943
						32498-Deletion-T--	0.949399
						32449-SNV-C-T	0.534392
						32945-SNV-C-T	0.541661
						33154-SNV-C-A	5.16757
						33276-SNV-G-A	0.221416
						32936-SNV-C-T	0.313107
						32445-SNV-A-G	0.390259
						32917-SNV-C-T	1.04267
						32856-SNV-C-T	0.49021
						32842-Deletion-A--	2.11332
						32901-SNV-C-T	0.22863
						32609-SNV-C-T	0.428219
						33474-SNV-C-A	0.317057
						32842-Insertion---A	1.38329
						33078-SNV-C-T	0.17517
						32299-SNV-C-T	0.212283
						32535-SNV-G-A	0.142711
						33070-SNV-C-T	0.143048
						33310-SNV-G-A	0.150398
						32590-SNV-C-T	0.208313
						32529-SNV-G-A	0.237402
						33476-SNV-T-C	0.163633
						32855-SNV-C-T	0.723026
						32081-Insertion---A	0.583533
						33111-SNV-G-A	0.176506
						32536-SNV-C-T	0.141296
						32734-SNV-A-G	0.231459
						33235-SNV-C-A	0.281214
						32940-SNV-G-A	0.212583
						32796-SNV-C-T	0.696415
						32924-Deletion-A--	0.483802
						33325-SNV-C-A	0.293956
						31869-SNV-G-T	0.554941
						33151-SNV-G-T	0.181488
						32749-SNV-C-T	0.229053
						32081-Deletion-A--	0.492811
						32490-SNV-A-G	0.197537
						33055-SNV-G-A	0.245512
						32058-SNV-G-T	0.283311
						32728-Deletion-A--	1.33578
						32114-SNV-C-T	1.57207
						32530-SNV-G-T	1.81105
						31806-SNV-C-T	0.26422

## Sheet: ST19. rnr1D57N susceptible 
Table S19. rnr1D57N susceptible postitions
Fraction of biological replicates mutated										Mean frequency by genotype
SNP.ID	msh2	msh3	msh6	rnr1D57N_msh2	rnr1D57N_msh3	rnr1D57N_msh6	rnr1D57N	WT		SNP.ID	msh2	msh3	msh6	rnr1D57N_msh2	rnr1D57N_msh3	rnr1D57N_msh6	rnr1D57N	WT	D57N/WT ratio
31971-Deletion-G--	0	0	0	0	0	0	0.571429	0		31971-Deletion-G--	0	0	0	0	0	0	60.8103	0	#DIV/0!
32739-SNV-A-C	0	0.166667	0	0	0	0	0.428571	0		32739-SNV-A-C	0	0.109198	0	0	0	0	2.89581	0	#DIV/0!
32008-SNV-C-A	0	0.333333	0	0	0	0.25	0.571429	0.111111		32008-SNV-C-A	0	0.562929	0	0	0	11.7528	11.3889	0.634608	17.9463
32274-SNV-G-T	1	0	0.5	0	0.25	0.5	0.428571	0.111111		32274-SNV-G-T	1.9941	0	0.245936	0	0.187527	0.357503	0.982789	0.144725	6.79075
32119-SNV-C-A	0	0.333333	0.5	0	0.25	0.25	0.428571	0.222222		32119-SNV-C-A	0	0.281604	0.176733	0	0.490265	0.11106	0.549268	0.146382	3.75228
33325-SNV-C-A	0.25	0.166667	0.75	0.5	0.25	0.75	0.428571	0.222222		33325-SNV-C-A	0.636442	0.140907	0.293956	0.155262	0.159893	0.989411	0.769117	0.378735	2.03075
32658-Deletion-C--	0.25	1	0	0.25	0.5	0.5	0.428571	0.111111		32658-Deletion-C--	0.409704	0.484925	0	0.442646	0.483297	0.183008	0.337553	0.166998	2.0213
32064-SNV-G-C	0.25	0.5	0	0	0	0	0.428571	0.222222		32064-SNV-G-C	0.19106	0.351618	0	0	0	0	0.323497	0.160379	2.01708
33172-SNV-C-G	0	0	0.5	0	0.25	0	0.428571	0.111111		33172-SNV-C-G	0	0	0.355707	0	0.301857	0	0.272879	0.139918	1.95028
33114-SNV-C-T	0.5	0.333333	1	1	0.25	1	0.714286	0.555556		33114-SNV-C-T	0.247689	0.200268	1.6022	0.392359	0.487181	1.18608	0.287829	0.180262	1.59673
33153-SNV-C-T	0.75	0	1	0.75	0	1	0.428571	0.111111		33153-SNV-C-T	0.406929	0	0.805283	0.1771	0	0.523392	0.320832	0.219444	1.46202
32299-SNV-C-T	0.5	0.333333	1	0.25	0.75	0.25	0.571429	0.333333		32299-SNV-C-T	0.202855	0.199683	0.212283	0.181195	0.221196	0.193753	0.227062	0.191587	1.18516
33276-SNV-G-A	0.75	0	0.75	0.5	0	0.75	0.571429	0.222222		33276-SNV-G-A	0.187121	0	0.221416	0.234614	0	0.195533	0.189861	0.16643	1.14079
32566-SNV-C-A	0	0.166667	0.5	0	0	0.75	0.428571	0.222222		32566-SNV-C-A	0	0.327422	0.220972	0	0	0.198943	0.1546	0.13679	1.1302
32700-SNV-C-T	0	0	0.25	0.25	0	0.25	0.428571	0.222222		32700-SNV-C-T	0	0	0.143517	0.158014	0	0.172329	0.16308	0.147923	1.10247
32901-SNV-C-T	1	0.833333	1	0.75	0.75	0.5	1	0.888889		32901-SNV-C-T	0.235093	0.224469	0.22863	0.218895	0.202853	0.195833	0.203833	0.191308	1.06547
33309-SNV-C-T	0.5	0.333333	0.25	0.75	0	0.25	0.428571	0.111111		33309-SNV-C-T	0.125655	0.128917	0.143252	0.121474	0	0.137958	0.126797	0.119883	1.05768
31650-SNV-C-T	0.5	0.333333	0.5	0.5	0	0.25	0.571429	0.444444		31650-SNV-C-T	0.253088	0.236617	0.263835	0.304042	0	0.234375	0.248786	0.238893	1.04141
32466-SNV-C-T	0.5	0.166667	0.25	0.75	0.25	0.75	0.428571	0.555556		32466-SNV-C-T	0.139656	0.131596	0.154701	0.154297	0.161787	0.143219	0.150892	0.14624	1.03181
33310-SNV-G-A	0.25	0.333333	0.75	1	0	0.75	0.714286	0.555556		33310-SNV-G-A	0.126326	0.127001	0.150398	0.136601	0	0.142908	0.143018	0.139366	1.02621
32165-SNV-G-A	0.25	0.166667	0.25	0.25	0	0.25	0.428571	0.222222		32165-SNV-G-A	0.187557	0.170829	0.162082	0.147779	0	0.17387	0.159308	0.156635	1.01706
32081-Insertion---A	1	0.666667	1	1	0.5	1	0.714286	0.666667		32081-Insertion---A	1.34589	0.207521	0.583533	5.66507	0.328193	0.321462	0.622107	0.623425	0.997886
32535-SNV-G-A	0.5	0.666667	1	0.75	0.75	0.75	0.571429	0.777778		32535-SNV-G-A	0.127316	0.118943	0.142711	0.135558	0.126286	0.147809	0.127983	0.129191	0.99065
32536-SNV-C-T	1	0.833333	1	1	0.75	0.75	0.571429	0.888889		32536-SNV-C-T	0.144517	0.140322	0.141296	0.16842	0.128974	0.137654	0.148497	0.153106	0.969899
32935-SNV-C-T	0.25	0.5	0.25	0.5	0.5	0.25	0.571429	0.444444		32935-SNV-C-T	0.12489	0.136365	0.12882	0.145114	0.117055	0.142234	0.128304	0.133502	0.961066
33476-SNV-T-C	0.75	0.333333	1	0.75	0.25	0.5	0.428571	0.555556		33476-SNV-T-C	0.170584	0.154779	0.163633	0.178185	0.24022	0.197164	0.155318	0.162235	0.957363
32092-SNV-C-T	0.25	0.5	0.25	0.25	0.25	0.25	0.428571	0.333333		32092-SNV-C-T	0.156215	0.133699	0.187873	0.136101	0.160279	0.124193	0.123513	0.131934	0.936173
31723-Deletion-A--	0.75	0.333333	0.5	0.5	0.5	0.5	0.857143	0.444444		31723-Deletion-A--	0.138723	0.136909	0.115741	0.128994	0.121181	0.153182	0.12992	0.149936	0.866503
33258-SNV-C-T	0.5	0.5	0.5	0.75	0.25	0.25	0.428571	0.222222		33258-SNV-C-T	0.149553	0.16204	0.178406	0.162681	0.145603	0.151097	0.149534	0.173472	0.862009
32088-SNV-C-T	0.75	0.333333	1	1	0.25	1	0.428571	0.222222		32088-SNV-C-T	0.362853	0.452126	1.13884	0.176266	0.18385	0.407812	0.26438	0.311969	0.847454
32583-SNV-A-G	0	0	0.25	0	0	0	0.428571	0.111111		32583-SNV-A-G	0	0	0.14757	0	0	0	0.276816	0.334041	0.828689
32081-Deletion-A--	1	1	0.75	1	1	1	0.428571	0.666667		32081-Deletion-A--	5.76493	1.82552	0.492811	7.91575	0.809074	0.327	0.600031	0.759634	0.789894
32575-SNV-G-T	0	0.166667	0	0	0.5	0.5	0.714286	0.222222		32575-SNV-G-T	0	0.322535	0	0	0.236165	0.404064	0.899513	1.2028	0.747849
32449-SNV-C-T	0.75	0.333333	0.75	0.75	0.5	1	0.714286	0.333333		32449-SNV-C-T	0.244455	0.250785	0.534392	0.237251	0.313607	1.09403	0.268888	0.362612	0.741531
32075-SNV-C-T	0.75	0.166667	1	1	0	1	0.428571	0.333333		32075-SNV-C-T	0.794313	0.507442	2.22765	5.55452	0	2.61159	0.310367	0.513829	0.604029
33043-SNV-C-A	0.25	0.333333	0	0	0	0.25	0.428571	0.222222		33043-SNV-C-A	0.115639	0.253452	0	0	0	0.155616	0.194236	0.323837	0.599795
32842-Deletion-A--	1	1	1	1	1	1	0.857143	1		32842-Deletion-A--	8.11059	6.07718	2.11332	17.5494	2.96233	0.885761	0.95911	1.65791	0.578505
32855-SNV-C-T	1	0.5	1	1	0.5	1	0.428571	0.555556		32855-SNV-C-T	0.320244	0.23812	0.723026	0.539318	1.12386	4.03319	0.332204	0.748653	0.443736
32498-Deletion-T--	1	1	1	1	1	1	0.714286	0.888889		32498-Deletion-T--	18.3723	1.71189	0.949399	6.2108	1.17795	0.967822	0.263707	0.597775	0.441147
32283-SNV-T-G	0	0.166667	0	0	0	0	0.571429	0.222222		32283-SNV-T-G	0	0.122443	0	0	0	0	2.72623	6.90005	0.395103
32842-Insertion---A	1	0.5	1	1	0.75	1	1	0.888889		32842-Insertion---A	3.25637	0.51611	1.38329	9.58792	0.446901	2.92227	0.457345	1.1859	0.385653
32924-Deletion-A--	1	0.166667	1	1	0.75	0	0.428571	0.444444		32924-Deletion-A--	2.07276	0.199498	0.483802	1.23176	0.156659	0	0.122929	0.603041	0.203848

## Sheet: ST20. rnr1Y285F susceptible
Table S20. rnr1Y285F susceptible positions
Fraction of biological replicates mutated													Mean frequency by genotype
SNP.ID	msh2	msh3	msh6	rnr1Y285F_msh2	rnr1Y285F_msh3	rnr1Y285F_msh6	rnr1Y285F_pGAL_msh2	rnr1Y285F_pGAL_msh6	rnr1Y285F_pGAL	rnr1Y285F	WT		SNP.ID	msh2	msh3	msh6	rnr1Y285F_msh2	rnr1Y285F_msh3	rnr1Y285F_msh6	rnr1Y285F_pGAL_msh2	rnr1Y285F_pGAL_msh6	rnr1Y285F_pGAL	rnr1Y285F	WT	rnr1Y285F/WT ratio
32530-SNV-G-T	1	0.166667	1	1	0.25	1	1	1	0.5	0.625	0.333333		32530-SNV-G-T	2.262	0.14609	1.81105	0.605158	0.14553	1.59874	0.577215	2.19882	0.118603	0.239859	19.9402	0.0120289
33168-SNV-C-A	0	0	0.25	0.25	0	0.75	0.5	0.5	0.5	0.5	0.111111		33168-SNV-C-A	0	0	0.233999	0.228416	0	0.248393	0.220004	2.21772	0.393916	0.409877	2.88475	0.142084
32114-SNV-C-T	0.75	0	1	1	0.5	1	0.5	1	1	1	0.555556		32114-SNV-C-T	0.393125	0	1.57207	2.90179	0.313043	3.77956	1.76029	7.30332	0.856644	1.84693	11.5708	0.15962
32081-Deletion-A--	1	1	0.75	1	0.5	0.5	1	0	0.5	0.5	0.666667		32081-Deletion-A--	5.76493	1.82552	0.492811	7.57384	0.111753	0.245515	0.788432	0	0.234444	0.12966	0.759634	0.170687
32924-Deletion-A--	1	0.166667	1	0.75	0.5	0	0.666667	0	0.333333	0.5	0.444444		32924-Deletion-A--	2.07276	0.199498	0.483802	0.211718	0.12873	0	0.16955	0	0.271209	0.120995	0.603041	0.200641
32842-Deletion-A--	1	1	1	1	1	1	1	0.75	1	1	1		32842-Deletion-A--	8.11059	6.07718	2.11332	3.61271	1.72887	0.374126	11.6345	0.516448	0.696173	0.346369	1.65791	0.208919
32917-SNV-C-T	0.75	0.666667	0.75	0.75	0	1	1	1	0.833333	0.625	0.333333		32917-SNV-C-T	0.147685	0.147413	1.04267	1.25084	0	0.520409	0.593051	0.791378	0.643033	0.22409	0.80585	0.278079
32498-Deletion-T--	1	1	1	1	1	0.5	1	0.5	1	0.75	0.888889		32498-Deletion-T--	18.3723	1.71189	0.949399	6.95304	0.24122	0.323412	3.21516	0.768891	0.341948	0.180758	0.597775	0.302385
32274-SNV-G-A	0.25	0	0.25	0.25	0.25	0.5	0.666667	0	0.5	0.5	0.222222		32274-SNV-G-A	0.145566	0	0.13986	0.213387	0.175426	0.148988	0.147656	0	0.720977	0.259158	0.563316	0.460058
31844-SNV-C-T	0.25	0	0.75	1	0.25	1	1	1	0.833333	0.75	0.222222		31844-SNV-C-T	0.123244	0	0.735943	2.90434	0.374418	0.938958	2.07488	0.763344	0.551267	0.22514	0.412298	0.546062
32796-SNV-C-T	0.25	0.333333	1	0	0	0	0.166667	0	0.666667	0.5	0.111111		32796-SNV-C-T	0.236986	0.171092	0.696415	0	0	0	0.110476	0	0.309038	0.542999	0.852199	0.637174
32188-SNV-C-A	0.5	0	0.75	1	0.25	1	1	1	0.5	0.5	0.444444		32188-SNV-C-A	0.208824	0	1.70669	2.41401	0.11997	3.41856	2.82525	2.2106	0.376123	0.20569	0.311029	0.661322
32945-SNV-C-T	0.75	0.166667	1	1	0	1	1	1	0.833333	0.75	0.222222		32945-SNV-C-T	0.519224	1.1536	0.541661	2.52868	0	9.50974	2.64109	6.47372	0.557612	0.303093	0.371206	0.816508
33310-SNV-G-A	0.25	0.333333	0.75	1	0.5	0.5	0.666667	0.25	0.833333	1	0.555556		33310-SNV-G-A	0.126326	0.127001	0.150398	0.137881	0.127373	0.127372	0.140245	0.118073	0.141911	0.125552	0.139366	0.900882
33476-SNV-T-C	0.75	0.333333	1	0.75	0.5	1	0.5	1	0	0.625	0.555556		33476-SNV-T-C	0.170584	0.154779	0.163633	0.149853	0.161248	0.187678	0.17073	0.142726	0	0.152736	0.162235	0.941445
33258-SNV-C-T	0.5	0.5	0.5	0.25	0.5	0.75	0.5	0.25	0.666667	0.75	0.222222		33258-SNV-C-T	0.149553	0.16204	0.178406	0.155755	0.16672	0.176045	0.190497	0.416254	0.193996	0.168905	0.173472	0.973677
32590-SNV-C-T	0	0.166667	0.75	0.25	0.5	0.25	0.5	0	0.5	0.5	0.111111		32590-SNV-C-T	0	0.205594	0.208313	0.189219	0.209107	0.226983	0.229202	0	0.208839	0.200107	0.202614	0.987623
31962-SNV-G-A	0.25	0.166667	0.5	0.5	0.25	0.25	0.333333	0.25	1	0.75	0.333333		31962-SNV-G-A	0.18597	0.219637	0.191846	0.202793	0.185713	0.178593	0.211351	0.178658	0.211785	0.193748	0.192712	1.00538
33070-SNV-C-T	0.25	0.666667	0.75	1	0.25	0.75	0.5	0	0.666667	0.625	0.222222		33070-SNV-C-T	0.141508	0.146562	0.143048	0.139663	0.112788	0.141348	0.120104	0	0.128726	0.134585	0.130372	1.03232
32466-SNV-C-T	0.5	0.166667	0.25	0.75	1	0.75	0.666667	0.75	0.666667	0.5	0.555556		32466-SNV-C-T	0.139656	0.131596	0.154701	0.187924	0.16724	0.158566	0.156275	0.179933	0.168963	0.153425	0.14624	1.04913
31650-SNV-C-T	0.5	0.333333	0.5	0.75	1	0.5	0.5	0	0.5	0.5	0.444444		31650-SNV-C-T	0.253088	0.236617	0.263835	0.227509	0.262879	0.258841	0.288434	0	0.271171	0.251408	0.238893	1.05239
33474-SNV-C-A	0.5	0.166667	1	1	1	1	0.833333	0.25	1	0.875	0.666667		33474-SNV-C-A	0.302511	0.298737	0.317057	0.33331	0.295734	0.288082	0.298905	0.243754	0.310151	0.292567	0.271086	1.07924
32965-SNV-C-T	0	0	0.5	0	0	0.5	0.333333	0	0.166667	0.625	0.333333		32965-SNV-C-T	0	0	0.131162	0	0	0.120051	0.128339	0	0.116691	0.133202	0.121611	1.09532
33309-SNV-C-T	0.5	0.333333	0.25	0.75	0	0.5	0	0	0.333333	0.5	0.111111		33309-SNV-C-T	0.125655	0.128917	0.143252	0.133203	0	0.145194	0	0	0.14172	0.132515	0.119883	1.10538
32092-SNV-C-T	0.25	0.5	0.25	0.5	0.5	0.25	0.5	0.25	0.666667	0.75	0.333333		32092-SNV-C-T	0.156215	0.133699	0.187873	0.122463	0.144996	0.160118	0.139358	0.131579	0.136074	0.146958	0.131934	1.11387
32075-SNV-C-T	0.75	0.166667	1	1	0.75	1	1	1	1	0.625	0.333333		32075-SNV-C-T	0.794313	0.507442	2.22765	4.87497	0.143736	7.79673	4.69453	7.61655	1.25151	0.579745	0.513829	1.12828
33276-SNV-G-A	0.75	0	0.75	1	1	1	0.5	0	0.5	0.625	0.222222		33276-SNV-G-A	0.187121	0	0.221416	0.202795	0.204067	0.21249	0.21949	0	0.185499	0.189659	0.16643	1.13958
32536-SNV-C-T	1	0.833333	1	1	1	1	1	0.25	1	1	0.888889		32536-SNV-C-T	0.144517	0.140322	0.141296	0.199489	0.140575	0.154498	0.146825	0.115675	0.167316	0.174488	0.153106	1.13965
32935-SNV-C-T	0.25	0.5	0.25	0.5	0	0.5	0.333333	0	0.166667	0.625	0.444444		32935-SNV-C-T	0.12489	0.136365	0.12882	0.212305	0	0.132582	0.147658	0	0.110147	0.152534	0.133502	1.14256
33056-SNV-C-T	0.25	0.333333	0.75	0.25	0.75	1	0.5	0	0.5	0.75	0.555556		33056-SNV-C-T	0.133084	0.143802	0.328872	0.153451	0.137083	0.144599	0.15159	0	0.139472	0.159389	0.139275	1.14442
32901-SNV-C-T	1	0.833333	1	0.75	1	0.75	0.833333	0.75	1	0.875	0.888889		32901-SNV-C-T	0.235093	0.224469	0.22863	0.23899	0.205327	0.191171	0.227367	0.353993	0.20559	0.220814	0.191308	1.15423
32165-SNV-G-A	0.25	0.166667	0.25	0.75	0.75	0.5	0.666667	0	0.166667	0.5	0.222222		32165-SNV-G-A	0.187557	0.170829	0.162082	0.156308	0.185348	0.200554	0.171485	0	0.167761	0.184117	0.156635	1.17545
32958-SNV-C-T	1	0.166667	1	1	0.25	1	1	1	0.833333	0.875	0.444444		32958-SNV-C-T	0.992357	0.202937	1.20763	0.98514	0.199549	9.57659	0.860991	1.36398	0.54688	0.408739	0.342453	1.19356
32535-SNV-G-A	0.5	0.666667	1	1	1	0.75	1	0.75	0.666667	0.875	0.777778		32535-SNV-G-A	0.127316	0.118943	0.142711	0.140292	0.15871	0.129412	0.133445	0.119825	0.126907	0.15438	0.129191	1.19497
32373-SNV-G-T	0.75	0.333333	1	1	0	0.75	0.166667	1	0.833333	0.5	0.111111		32373-SNV-G-T	0.180881	0.179852	0.643014	0.413394	0	0.340345	0.123755	0.233686	0.367149	0.157506	0.122328	1.28757
32271-SNV-C-T	0.5	0.333333	1	0.75	0.25	1	1	0.75	0.833333	0.625	0.555556		32271-SNV-C-T	0.595598	0.216994	0.606782	0.240246	0.1871	0.443613	0.41489	0.329631	0.283972	0.328724	0.250918	1.31009
33159-SNV-C-T	0.5	0.166667	1	1	0.25	0.25	1	0.75	0.833333	0.5	0.111111		33159-SNV-C-T	0.328871	0.206371	0.564055	0.417252	0.134197	0.858742	0.632951	0.516896	0.309753	0.199544	0.148914	1.33999
32855-SNV-C-T	1	0.5	1	1	0	1	1	1	1	0.625	0.555556		32855-SNV-C-T	0.320244	0.23812	0.723026	0.664527	0	1.48974	1.37009	1.1393	3.12576	1.02283	0.748653	1.36622
32274-SNV-G-T	1	0	0.5	1	0.5	1	1	1	0.833333	0.75	0.111111		32274-SNV-G-T	1.9941	0	0.245936	0.301473	0.932609	1.35079	0.470903	1.47224	0.769809	0.285055	0.144725	1.96964
32917-SNV-C-A	0.25	0.166667	0.75	0.75	0.5	1	1	1	1	0.875	0.222222		32917-SNV-C-A	0.488044	0.391654	0.613618	0.658097	0.748789	1.75439	2.77153	0.508591	1.14219	0.499884	0.243043	2.05677
32088-SNV-C-T	0.75	0.333333	1	1	0	1	1	1	1	0.875	0.222222		32088-SNV-C-T	0.362853	0.452126	1.13884	0.920605	0	2.68887	1.70552	2.01031	0.908242	0.77534	0.311969	2.48531
33153-SNV-C-T	0.75	0	1	1	0.5	1	1	1	0.833333	0.625	0.111111		33153-SNV-C-T	0.406929	0	0.805283	2.45872	0.374327	3.79426	4.47235	3.83939	0.671649	0.708851	0.219444	3.23021
33151-SNV-G-T	0	0.5	0.75	0.75	0	1	0.166667	0.5	0.833333	0.75	0.555556		33151-SNV-G-T	0	0.172757	0.181488	0.166388	0	0.264394	0.112332	0.112361	0.391915	1.00373	0.269443	3.7252
32658-Deletion-C--	0.25	1	0	0.75	1	0	1	0.25	0.666667	0.5	0.111111		32658-Deletion-C--	0.409704	0.484925	0	0.23323	6.25071	0	1.56037	0.150763	0.457925	0.668241	0.166998	4.0015
31981-SNV-G-A	0.5	0.333333	0.5	0.25	0.5	0.5	0.166667	0	0.833333	0.75	0.555556		31981-SNV-G-A	1.99957	0.119766	0.162384	0.273002	0.150841	0.170483	0.150368	0	0.172662	0.656918	0.140403	4.67881
32819-SNV-G-T	0.5	0.166667	0.5	1	0	1	1	1	0.833333	0.5	0.111111		32819-SNV-G-T	1.51275	0.122666	0.395809	1.12251	0	2.20215	1.92471	0.539191	0.240073	0.977075	0.198404	4.92468
32670-Deletion-G--	0.5	1	0	1	1	0	1	0	0.666667	0.875	0.111111		32670-Deletion-G--	0.224124	1.58748	0	2.05677	28.2751	0	2.24215	0	1.09491	1.92176	0.302498	6.35297
33114-SNV-C-T	0.5	0.333333	1	0.25	0	1	1	0.75	0.5	0.625	0.555556		33114-SNV-C-T	0.247689	0.200268	1.6022	0.116195	0	0.225421	0.242589	0.242795	0.165016	1.17432	0.180262	6.5145
33325-SNV-C-A	0.25	0.166667	0.75	1	0.5	1	0.833333	1	0.833333	0.5	0.222222		33325-SNV-C-A	0.636442	0.140907	0.293956	0.294315	0.294352	1.41061	0.481835	1.04246	0.660255	3.31215	0.378735	8.7453
32449-SNV-C-T	0.75	0.333333	0.75	0	0	0.25	0	0.75	0.666667	0.5	0.333333		32449-SNV-C-T	0.244455	0.250785	0.534392	0	0	0.339729	0	0.250412	0.23141	6.95595	0.362612	19.1829
32940-SNV-G-T	1	0.166667	1	1	0.5	1	1	1	1	1	0.444444		32940-SNV-G-T	0.374908	0.27173	0.640695	8.75686	0.297245	11.4932	4.81803	5.44453	1.45541	30.3703	0.167126	181.721
32556-SNV-C-A	0.25	0.333333	0.25	0.5	0	1	0.666667	0.75	0.333333	0.75	0		32556-SNV-C-A	0.133276	0.219405	0.354366	0.303551	0	0.492696	0.261322	0.509827	0.163271	0.492945	0	#DIV/0!
32027-SNV-G-T	0.25	0.333333	0.25	1	0.5	1	1	1	0.833333	0.625	0		32027-SNV-G-T	0.123513	0.13113	0.136208	0.865893	0.240628	1.23581	0.859273	0.56176	0.638545	0.285531	0	#DIV/0!
32783-SNV-G-T	0	0	0.5	0.5	0.25	1	0.166667	0.5	0.5	0.5	0		32783-SNV-G-T	0	0	0.20462	0.161405	0.326447	0.274809	0.124911	0.215954	0.133658	3.45676	0	#DIV/0!
32660-SNV-C-T	0.5	0	1	0	0	0.25	0	0.25	0.5	0.5	0		32660-SNV-C-T	1.95937	0	0.382927	0	0	0.458104	0	0.821	0.141201	2.91275	0	#DIV/0!
33356-Deletion-C--	0	0.333333	0	0	1	0	0.666667	0	0.5	0.5	0		33356-Deletion-C--	0	0.339883	0	0	3.32433	0	0.573446	0	0.209051	1.79197	0	#DIV/0!
32166-SNV-C-T	0.75	0	1	0.25	0	0.25	0.833333	0.5	0.333333	0.5	0		32166-SNV-C-T	0.578225	0	0.551273	0.295293	0	1.33021	0.455811	0.181485	0.398335	0.509747	0	#DIV/0!
32958-SNV-C-A	0	0	0	0	0	0	0	0	0	0.5	0		32958-SNV-C-A	0	0	0	0	0	0	0	0	0	0.172503	0	#DIV/0!

## Sheet: ST21. rnr1Y285A susceptible
Table S21. rnr1Y285A susceptible positions
Fraction of biological replicates mutated														Mean frequency by genotype
Group.2	msh2	msh3	msh6	rnr1Y285A_msh2	rnr1Y285A_msh3	rnr1Y285A_msh6	rnr1Y285A_pGAL_msh2	rnr1Y285A_pGAL_msh3	rnr1Y285A_pGAL_msh6	rnr1Y285A_pGAL	rnr1Y285A	WT		Group.2	msh2	msh3	msh6	rnr1Y285A_msh2	rnr1Y285A_msh3	rnr1Y285A_msh6	rnr1Y285A_pGAL_msh2	rnr1Y285A_pGAL_msh3	rnr1Y285A_pGAL_msh6	rnr1Y285A_pGAL	rnr1Y285A	WT	rnr1Y285A/WT ratio
32556-SNV-C-A	0.25	0.333333	0.25	0.571429	0.25	0.8	0.5	0.25	1	1	1	0		32556-SNV-C-A	0.133276	0.219405	0.354366	0.383361	1.96568	7.14568	1.04449	0.184854	21.0035	2.02373	7.90374	0	#DIV/0!
32027-SNV-G-T	0.25	0.333333	0.25	0.857143	0	1	0.5	0	1	1	1	0		32027-SNV-G-T	0.123513	0.13113	0.136208	0.887128	0	1.25691	0.833626	0	1.95881	2.44901	5.39902	0	#DIV/0!
33356-Deletion-C--	0	0.333333	0	0.714286	1	0	0.25	1	1	1	1	0		33356-Deletion-C--	0	0.339883	0	1.67539	1.87156	0	0.693129	2.00122	0.729068	3.92628	3.15168	0	#DIV/0!
33153-SNV-C-A	0	0.333333	0.75	1	0	1	0.75	0	1	1	1	0		33153-SNV-C-A	0	1.43337	0.318158	1.72431	0	4.17638	0.881032	0	1.33044	2.47318	2.67137	0	#DIV/0!
32958-SNV-C-A	0	0	0	0.142857	0.25	0	0	0	1	0.5	1	0		32958-SNV-C-A	0	0	0	0.289709	0.156436	0	0	0	0.318656	0.332314	1.09677	0	#DIV/0!
32747-Deletion-C--	0	0.166667	0	0.571429	1	0	0.25	1	0.75	1	1	0		32747-Deletion-C--	0	0.146637	0	0.37356	3.49104	0	0.361299	6.29192	0.569585	3.05316	0.874714	0	#DIV/0!
32783-SNV-G-T	0	0	0.5	0.142857	0	0	0	0	0.75	0.333333	1	0		32783-SNV-G-T	0	0	0.20462	0.183697	0	0	0	0	1.66346	0.326809	0.527926	0	#DIV/0!
32277-SNV-C-A	0	0	0	0.285714	0	0.2	0	0	0.75	1	0.8	0		32277-SNV-C-A	0	0	0	0.37398	0	0.217181	0	0	0.323437	1.1852	0.647541	0	#DIV/0!
32508-SNV-G-A	0.25	0	0.5	0.571429	0	0.8	0	0	0.5	0	0.8	0		32508-SNV-G-A	0.133089	0	0.19887	0.282308	0	0.125156	0	0	0.58345	0	0.273844	0	#DIV/0!
31981-SNV-G-T	0.75	0	0.25	0	0	0.2	0	0.5	1	0.333333	0.8	0		31981-SNV-G-T	0.145296	0	0.199927	0	0	0.191443	0	0.616884	0.368152	0.181744	0.269731	0	#DIV/0!
33159-SNV-C-A	0	0	0	0.285714	0	0.6	0.25	0	0	0.833333	0.6	0		33159-SNV-C-A	0	0	0	0.268571	0	0.3729	4.46748	0	0	0.459836	1.65581	0	#DIV/0!
33078-Deletion-C--	0	0	0	0.142857	0.75	0	0	1	0.5	0.833333	0.6	0		33078-Deletion-C--	0	0	0	0.440862	0.300565	0	0	0.526198	0.187896	0.347761	0.739664	0	#DIV/0!
33195-SNV-C-A	0	0	0.5	0.428571	0	0.2	0	0	0.75	0	0.6	0		33195-SNV-C-A	0	0	0.12644	0.382598	0	0.399639	0	0	0.27225	0	0.290149	0	#DIV/0!
32304-SNV-G-T	0	0.5	0.25	0.285714	0	0.4	0	0	0.25	0.166667	0.6	0		32304-SNV-G-T	0	1.39778	0.189223	1.12141	0	0.383491	0	0	3.16832	0.267771	0.182408	0	#DIV/0!
32786-SNV-C-A	0	0.166667	0.25	0.285714	0	1	0.5	0	0.5	0.833333	0.6	0		32786-SNV-C-A	0	0.224635	0.326763	3.28264	0	0.589312	0.168331	0	0.825533	0.410558	0.178715	0	#DIV/0!
32658-Deletion-C--	0.25	1	0	0.857143	1	0.2	1	1	1	1	1	0.111111		32658-Deletion-C--	0.409704	0.484925	0	5.20615	16.4023	0.240628	1.54768	29.4239	26.1985	9.29127	8.36079	0.166998	50.0653
32608-Deletion-C--	0	0.666667	0	1	1	0.2	0.5	1	1	1	1	0.111111		32608-Deletion-C--	0	0.396089	0	5.38001	36.4735	0.173491	2.93521	31.7494	11.7794	19.3598	5.99079	0.136612	43.8526
32707-Deletion-C--	1	0.666667	0.75	1	1	0	1	1	1	1	1	0.222222		32707-Deletion-C--	6.88739	0.573184	0.866348	1.05048	10.1253	0	0.704752	11.3822	4.98419	3.80874	4.97606	0.186765	26.6434
32917-SNV-C-A	0.25	0.166667	0.75	1	0	1	0.5	0.5	1	1	1	0.222222		32917-SNV-C-A	0.488044	0.391654	0.613618	3.53882	0	2.26644	3.90784	4.10516	5.94137	6.59952	4.10717	0.243043	16.8989
32670-Deletion-G--	0.5	1	0	1	1	0.2	1	1	1	1	1	0.111111		32670-Deletion-G--	0.224124	1.58748	0	2.0315	23.5739	0.230681	0.835003	4.89646	4.19514	7.11953	2.91101	0.302498	9.62322
33325-SNV-C-A	0.25	0.166667	0.75	0.714286	0	1	1	0.5	0.75	1	1	0.222222		33325-SNV-C-A	0.636442	0.140907	0.293956	0.746667	0	0.603047	0.51731	1.4473	1.40713	2.70609	3.03121	0.378735	8.0035
32842-Deletion-A--	1	1	1	1	0.75	0.8	1	0.75	0.75	1	1	1		32842-Deletion-A--	8.11059	6.07718	2.11332	4.98912	0.157769	1.36756	4.45407	0.184572	0.427595	0.248172	8.67258	1.65791	5.23103
32819-SNV-G-T	0.5	0.166667	0.5	1	0.25	1	0.5	0.25	1	1	0.8	0.111111		32819-SNV-G-T	1.51275	0.122666	0.395809	1.22826	0.120695	4.28981	0.975647	0.27126	1.05026	2.79131	0.774553	0.198404	3.90392
33153-SNV-C-T	0.75	0	1	0.857143	0	1	1	0	1	1	1	0.111111		33153-SNV-C-T	0.406929	0	0.805283	2.51758	0	3.36711	1.07245	0	0.696712	0.481692	0.808984	0.219444	3.68651
31981-SNV-G-A	0.5	0.333333	0.5	0.285714	0.5	0.6	0	0.25	1	0.833333	0.8	0.555556		31981-SNV-G-A	1.99957	0.119766	0.162384	0.346116	0.136071	0.394251	0	0.109904	0.199178	0.213808	0.513681	0.140403	3.65862
32945-SNV-C-T	0.75	0.166667	1	1	0	1	1	0.25	0.5	0.833333	0.8	0.222222		32945-SNV-C-T	0.519224	1.1536	0.541661	1.72595	0	4.28208	0.729787	0.14652	0.516351	0.258037	1.10273	0.371206	2.97066
33151-SNV-G-T	0	0.5	0.75	0.428571	0	0.6	0.25	0	0.5	0.666667	1	0.555556		33151-SNV-G-T	0	0.172757	0.181488	0.267404	0	0.240901	0.323655	0	2.25967	5.05569	0.746272	0.269443	2.76969
33168-SNV-C-T	1	0.166667	1	0.571429	0	0.4	0.5	0	0.25	0.666667	0.6	0.111111		33168-SNV-C-T	0.208313	0.213631	2.39091	2.6145	0	0.361328	0.237249	0	0.21155	0.296147	0.469026	0.172427	2.72014
32088-SNV-C-T	0.75	0.333333	1	1	0	1	1	0	0.75	1	0.8	0.222222		32088-SNV-C-T	0.362853	0.452126	1.13884	1.58319	0	1.8589	0.638921	0	0.327833	0.411326	0.706739	0.311969	2.26541
32940-SNV-G-T	1	0.166667	1	1	0	1	1	0	0.5	1	0.8	0.444444		32940-SNV-G-T	0.374908	0.27173	0.640695	3.47167	0	1.60431	7.76755	0	0.167784	0.716253	0.350117	0.167126	2.09493
32075-SNV-C-T	0.75	0.166667	1	1	0.25	1	1	0	0.75	1	1	0.333333		32075-SNV-C-T	0.794313	0.507442	2.22765	5.29038	0.134322	4.45337	3.08992	0	0.542991	0.595528	0.98053	0.513829	1.90828
33015-SNV-G-T	0.25	0	0.5	0.285714	0	0	0	0	0	0.166667	0.6	0.222222		33015-SNV-G-T	0.115639	0	0.15953	0.137151	0	0	0	0	0	0.180602	0.704814	0.369626	1.90683
32188-SNV-C-A	0.5	0	0.75	1	0.25	1	0.5	0	1	1	1	0.444444		32188-SNV-C-A	0.208824	0	1.70669	4.72818	0.296885	5.39597	0.621584	0	0.47447	0.92364	0.494747	0.311029	1.59068
32780-SNV-C-T	0.25	0	1	0.142857	0	0.2	0.25	0	0	0	0.6	0.222222		32780-SNV-C-T	0.563962	0	0.296365	0.420245	0	0.255888	0.916414	0	0	0	0.222761	0.144445	1.54218
32958-SNV-C-T	1	0.166667	1	0.714286	0	1	1	0	0.25	0.5	1	0.444444		32958-SNV-C-T	0.992357	0.202937	1.20763	0.90323	0	1.22117	1.82774	0	0.403777	0.5823	0.481381	0.342453	1.40568
31979-Deletion-G--	0.25	1	0	0.857143	1	0	0.5	1	0.25	0.833333	0.6	0.111111		31979-Deletion-G--	0.428841	1.61127	0	0.459239	2.44434	0	5.73713	2.14944	0.605858	0.330723	0.264572	0.198544	1.33256
32794-SNV-C-A	0.25	0	0.25	0.142857	0.25	0.2	0.25	0	0.5	0.5	0.6	0.444444		32794-SNV-C-A	0.120501	0	0.134511	0.12181	0.88612	0.624369	0.214222	0	0.232393	0.507909	0.20246	0.156604	1.29281
32259-SNV-C-T	0	0	0.75	0.571429	0	0.4	0	0	0.25	0.333333	0.6	0.222222		32259-SNV-C-T	0	0	0.355774	0.365518	0	0.326677	0	0	0.137179	0.123842	0.212954	0.166113	1.28198
32571-SNV-C-T	0.25	0.166667	0.5	0.142857	0	0.2	0.25	0	0.25	0.166667	0.6	0.111111		32571-SNV-C-T	0.14835	0.165672	0.306571	0.229148	0	0.111599	0.450839	0	0.3107	0.150815	0.257172	0.205391	1.25211
32274-SNV-G-T	1	0	0.5	0.428571	0	0.8	0.5	0	0.25	0.666667	0.8	0.111111		32274-SNV-G-T	1.9941	0	0.245936	0.539713	0	0.430988	0.118292	0	0.118812	0.315589	0.180642	0.144725	1.24818
32535-SNV-G-A	0.5	0.666667	1	0.714286	0.25	0.8	0.5	1	1	0.833333	0.8	0.777778		32535-SNV-G-A	0.127316	0.118943	0.142711	0.13961	0.123199	0.131438	0.190788	0.117524	0.133055	0.132651	0.148981	0.129191	1.15318
33310-SNV-G-A	0.25	0.333333	0.75	0.428571	1	0.4	0.5	0.5	0.25	1	0.8	0.555556		33310-SNV-G-A	0.126326	0.127001	0.150398	0.125933	0.158264	0.138618	0.173126	0.123423	0.12846	0.144688	0.158619	0.139366	1.13815
33474-SNV-C-A	0.5	0.166667	1	0.857143	1	0.6	1	0.75	0.25	1	1	0.666667		33474-SNV-C-A	0.302511	0.298737	0.317057	0.339824	0.314964	0.295379	0.323804	0.282961	0.244106	0.289979	0.30501	0.271086	1.12514
31844-SNV-C-T	0.25	0	0.75	0.857143	0	1	0.25	0	0.5	0.833333	0.8	0.222222		31844-SNV-C-T	0.123244	0	0.735943	1.31197	0	0.842494	0.757023	0	0.224307	0.464109	0.462783	0.412298	1.12245
31650-SNV-C-T	0.5	0.333333	0.5	0.285714	0.75	0.6	0.75	0	0	0.333333	1	0.444444		31650-SNV-C-T	0.253088	0.236617	0.263835	0.207927	0.258094	0.259861	0.262371	0	0	0.235541	0.267602	0.238893	1.12017
32536-SNV-C-T	1	0.833333	1	0.571429	1	0.6	0.75	1	1	1	1	0.888889		32536-SNV-C-T	0.144517	0.140322	0.141296	0.158608	0.127849	0.153534	0.146892	0.155627	0.139531	0.155235	0.168766	0.153106	1.10228
32165-SNV-G-A	0.25	0.166667	0.25	0.571429	0.25	0.4	0.75	0.5	0	0.833333	0.6	0.222222		32165-SNV-G-A	0.187557	0.170829	0.162082	0.162225	0.177305	0.149032	0.195828	0.173143	0	0.189773	0.166202	0.156635	1.06108
32092-SNV-C-T	0.25	0.5	0.25	0.571429	0.5	0.2	0.5	0.75	0	0.5	0.6	0.333333		32092-SNV-C-T	0.156215	0.133699	0.187873	0.134324	0.127316	0.13401	0.138105	0.134441	0	0.129729	0.137545	0.131934	1.04253
32901-SNV-C-T	1	0.833333	1	0.714286	0.75	0.6	1	1	1	1	1	0.888889		32901-SNV-C-T	0.235093	0.224469	0.22863	0.192516	0.224084	0.188207	0.211522	0.211161	0.207727	0.204815	0.191226	0.191308	0.999567
32466-SNV-C-T	0.5	0.166667	0.25	0.857143	0.75	0.8	1	0.5	0	0.833333	0.6	0.555556		32466-SNV-C-T	0.139656	0.131596	0.154701	0.170926	0.175888	0.214842	0.190102	0.166069	0	0.149736	0.144575	0.14624	0.988614
31962-SNV-G-A	0.25	0.166667	0.5	0.428571	0.5	0.6	0.75	0.5	0.25	0.333333	0.8	0.333333		31962-SNV-G-A	0.18597	0.219637	0.191846	0.189715	0.186498	0.194126	0.215802	0.235212	0.183425	0.213855	0.189055	0.192712	0.981023
33476-SNV-T-C	0.75	0.333333	1	0.428571	1	0	0.5	0.75	0.75	1	0.6	0.555556		33476-SNV-T-C	0.170584	0.154779	0.163633	0.138923	0.153434	0	0.151787	0.154558	0.164788	0.158442	0.157314	0.162235	0.969669
33070-SNV-C-T	0.25	0.666667	0.75	0.714286	0.75	0.8	0.75	0.75	0.25	0.5	0.6	0.222222		33070-SNV-C-T	0.141508	0.146562	0.143048	0.154111	0.127941	0.13403	0.226537	0.133927	0.129894	0.131126	0.120331	0.130372	0.922983
32735-SNV-G-T	0	0	0.5	0.571429	0	1	0.25	0	0.5	0.833333	0.8	0.222222		32735-SNV-G-T	0	0	0.580786	0.848155	0	1.87918	0.607495	0	1.9601	0.65463	0.146021	0.163173	0.894886
33168-SNV-C-A	0	0	0.25	0.857143	0	1	0.25	0	1	1	1	0.111111		33168-SNV-C-A	0	0	0.233999	2.00697	0	0.609251	1.38442	0	0.702718	1.22676	2.5236	2.88475	0.874807
31723-Deletion-A--	0.75	0.333333	0.5	0.428571	1	0.8	0.5	0.5	0.25	1	0.8	0.444444		31723-Deletion-A--	0.138723	0.136909	0.115741	0.126305	0.157715	0.13598	0.149984	0.124083	0.131406	0.145359	0.121303	0.149936	0.809032
33114-SNV-C-T	0.5	0.333333	1	0.428571	0.5	0.8	0.75	0.75	0.25	0.666667	0.6	0.555556		33114-SNV-C-T	0.247689	0.200268	1.6022	0.569367	0.110981	0.218139	0.584013	0.126657	0.127799	0.191623	0.141124	0.180262	0.782883
32855-SNV-C-T	1	0.5	1	0.714286	0.25	1	0.5	0	0.5	0.833333	0.8	0.555556		32855-SNV-C-T	0.320244	0.23812	0.723026	1.73112	0.117704	0.59542	0.470917	0	0.217226	0.280267	0.536847	0.748653	0.717084
32271-SNV-C-T	0.5	0.333333	1	0.857143	0.25	0.6	0.5	0.5	0.5	0.666667	0.6	0.555556		32271-SNV-C-T	0.595598	0.216994	0.606782	0.279764	0.165387	0.286887	0.337269	0.189299	0.321705	0.305491	0.179911	0.250918	0.717013
32081-Deletion-A--	1	1	0.75	0.714286	0.5	0.8	1	0.5	0	0.666667	0.6	0.666667		32081-Deletion-A--	5.76493	1.82552	0.492811	0.560432	0.122722	0.523224	5.3123	0.123654	0	0.194994	0.16971	0.759634	0.22341
32081-Insertion---A	1	0.666667	1	0.857143	0	0.2	1	0	0.25	0.333333	0.6	0.666667		32081-Insertion---A	1.34589	0.207521	0.583533	0.763556	0	0.109857	1.34134	0	2.31922	0.156332	0.126482	0.623425	0.202882
32114-SNV-C-T	0.75	0	1	0.857143	0	0.8	1	0	1	1	1	0.555556		32114-SNV-C-T	0.393125	0	1.57207	1.49583	0	1.47665	0.498911	0	0.44574	0.646637	2.33016	11.5708	0.201383

## Sheet: ST22. Tri-context cosine
Table S22: trinucleotide context cosine similarity scores
	msh3	msh6	rnr1D57N	rnr1D57N_msh3	rnr1D57N_msh6	rnr1Y285A	rnr1Y285A_msh2	rnr1Y285A_msh3	rnr1Y285A_msh6	rnr1Y285A_pGAL	rnr1Y285A_pGAL_msh2	rnr1Y285A_pGAL_msh6	rnr1Y285F	rnr1Y285F_msh2	rnr1Y285F_msh3	rnr1Y285F_msh6	rnr1Y285F_pGAL	rnr1Y285F_pGAL_msh2	rnr1Y285F_pGAL_msh6	WT	WT_2424	msh2	rnr1Y285A_pGAL_msh3	rnr1D57N_msh2
msh3	1	0.867171	0.87728	0.862442	0.832357	0.811183	0.839913	0.6622	0.814792	0.783383	0.800258	0.818726	0.875819	0.818408	0.711891	0.823306	0.920102	0.825549	0.756778	0.899032	0.895105	0.848915	0.670334	0.786444
msh6	0.867171	1	0.837572	0.81653	0.951666	0.864692	0.895352	0.697112	0.888543	0.838669	0.881366	0.879245	0.87389	0.912527	0.749999	0.928431	0.911415	0.919638	0.869355	0.843841	0.834583	0.939289	0.727381	0.884358
rnr1D57N	0.87728	0.837572	1	0.773829	0.830004	0.877136	0.864817	0.778409	0.858212	0.876404	0.873534	0.836926	0.906749	0.830955	0.785426	0.820248	0.920403	0.876525	0.72996	0.863804	0.895385	0.860818	0.770879	0.83871
rnr1D57N_msh3	0.862442	0.81653	0.773829	1	0.798506	0.718222	0.771809	0.50822	0.763682	0.670578	0.721605	0.771334	0.761281	0.725527	0.547008	0.794922	0.822267	0.718205	0.794481	0.864951	0.767346	0.783897	0.524204	0.69434
rnr1D57N_msh6	0.832357	0.951666	0.830004	0.798506	1	0.866221	0.902071	0.717461	0.8952	0.846488	0.902083	0.859189	0.870827	0.898203	0.746287	0.925513	0.894747	0.924966	0.882404	0.836858	0.823732	0.942131	0.747091	0.91359
rnr1Y285A	0.811183	0.864692	0.877136	0.718222	0.866221	1	0.918457	0.883397	0.916345	0.942854	0.918516	0.900492	0.939685	0.928368	0.890489	0.885697	0.926774	0.93351	0.761287	0.761221	0.886923	0.881064	0.886298	0.918912
rnr1Y285A_msh2	0.839913	0.895352	0.864817	0.771809	0.902071	0.918457	1	0.836694	0.971443	0.920966	0.937712	0.918409	0.921072	0.961892	0.840539	0.967479	0.923257	0.967041	0.86471	0.800074	0.905675	0.915726	0.843792	0.922961
rnr1Y285A_msh3	0.6622	0.697112	0.778409	0.50822	0.717461	0.883397	0.836694	1	0.824372	0.907339	0.86942	0.763412	0.878499	0.844385	0.96222	0.750553	0.816384	0.860064	0.535214	0.583332	0.830756	0.771875	0.960833	0.880906
rnr1Y285A_msh6	0.814792	0.888543	0.858212	0.763682	0.8952	0.916345	0.971443	0.824372	1	0.911836	0.949646	0.91485	0.90907	0.937818	0.821484	0.952435	0.911872	0.963059	0.858804	0.781552	0.871209	0.911999	0.840802	0.923254
rnr1Y285A_pGAL	0.783383	0.838669	0.876404	0.670578	0.846488	0.942854	0.920966	0.907339	0.911836	1	0.925874	0.8981	0.945346	0.925942	0.90183	0.879573	0.912434	0.930259	0.712062	0.720522	0.884615	0.862712	0.912623	0.916977
rnr1Y285A_pGAL_msh2	0.800258	0.881366	0.873534	0.721605	0.902083	0.918516	0.937712	0.86942	0.949646	0.925874	1	0.882868	0.935704	0.915678	0.884338	0.90712	0.913402	0.954484	0.784908	0.778254	0.882446	0.916587	0.899189	0.956545
rnr1Y285A_pGAL_msh6	0.818726	0.879245	0.836926	0.771334	0.859189	0.900492	0.918409	0.763412	0.91485	0.8981	0.882868	1	0.9022	0.905633	0.783941	0.909724	0.895486	0.90425	0.806031	0.769179	0.829787	0.833673	0.802811	0.858241
rnr1Y285F	0.875819	0.87389	0.906749	0.761281	0.870827	0.939685	0.921072	0.878499	0.90907	0.945346	0.935704	0.9022	1	0.916083	0.892121	0.88209	0.960551	0.928227	0.742541	0.814996	0.927297	0.882491	0.889567	0.922362
rnr1Y285F_msh2	0.818408	0.912527	0.830955	0.725527	0.898203	0.928368	0.961892	0.844385	0.937818	0.925942	0.915678	0.905633	0.916083	1	0.879401	0.958822	0.922249	0.965676	0.827731	0.75196	0.879613	0.900122	0.857912	0.927668
rnr1Y285F_msh3	0.711891	0.749999	0.785426	0.547008	0.746287	0.890489	0.840539	0.96222	0.821484	0.90183	0.884338	0.783941	0.892121	0.879401	1	0.775696	0.843386	0.867121	0.558061	0.626401	0.837345	0.795429	0.950416	0.88365
rnr1Y285F_msh6	0.823306	0.928431	0.820248	0.794922	0.925513	0.885697	0.967479	0.750553	0.952435	0.879573	0.90712	0.909724	0.88209	0.958822	0.775696	1	0.910065	0.948782	0.915659	0.785173	0.852943	0.911009	0.781758	0.898117
rnr1Y285F_pGAL	0.920102	0.911415	0.920403	0.822267	0.894747	0.926774	0.923257	0.816384	0.911872	0.912434	0.913402	0.895486	0.960551	0.922249	0.843386	0.910065	1	0.92929	0.814722	0.869612	0.929429	0.902068	0.818791	0.897649
rnr1Y285F_pGAL_msh2	0.825549	0.919638	0.876525	0.718205	0.924966	0.93351	0.967041	0.860064	0.963059	0.930259	0.954484	0.90425	0.928227	0.965676	0.867121	0.948782	0.92929	1	0.834877	0.786919	0.887677	0.929829	0.870227	0.950024
rnr1Y285F_pGAL_msh6	0.756778	0.869355	0.72996	0.794481	0.882404	0.761287	0.86471	0.535214	0.858804	0.712062	0.784908	0.806031	0.742541	0.827731	0.558061	0.915659	0.814722	0.834877	1	0.778347	0.715803	0.832687	0.560032	0.770431
WT	0.899032	0.843841	0.863804	0.864951	0.836858	0.761221	0.800074	0.583332	0.781552	0.720522	0.778254	0.769179	0.814996	0.75196	0.626401	0.785173	0.869612	0.786919	0.778347	1	0.818222	0.84359	0.585476	0.756416
WT_2424	0.895105	0.834583	0.895385	0.767346	0.823732	0.886923	0.905675	0.830756	0.871209	0.884615	0.882446	0.829787	0.927297	0.879613	0.837345	0.852943	0.929429	0.887677	0.715803	0.818222	1	0.856361	0.820419	0.864639
msh2	0.848915	0.939289	0.860818	0.783897	0.942131	0.881064	0.915726	0.771875	0.911999	0.862712	0.916587	0.833673	0.882491	0.900122	0.795429	0.911009	0.902068	0.929829	0.832687	0.84359	0.856361	1	0.782655	0.910925
rnr1Y285A_pGAL_msh3	0.670334	0.727381	0.770879	0.524204	0.747091	0.886298	0.843792	0.960833	0.840802	0.912623	0.899189	0.802811	0.889567	0.857912	0.950416	0.781758	0.818791	0.870227	0.560032	0.585476	0.820419	0.782655	1	0.907041
rnr1D57N_msh2	0.786444	0.884358	0.83871	0.69434	0.91359	0.918912	0.922961	0.880906	0.923254	0.916977	0.956545	0.858241	0.922362	0.927668	0.88365	0.898117	0.897649	0.950024	0.770431	0.756416	0.864639	0.910925	0.907041	1

[truncated: 1 more sheets: ST23. SBS COSMIC cosine]
