# Supplementary figures and images for: Complex mutation profiles in mismatch repair and ribonucleotide reductase mutants reveal novel repair substrate specificity of MutS homolog (MSH) complexes
Source: Oxford University Press journal article supplement (doi:10.1093/genetics/iyac092), 2022-06-10

**A**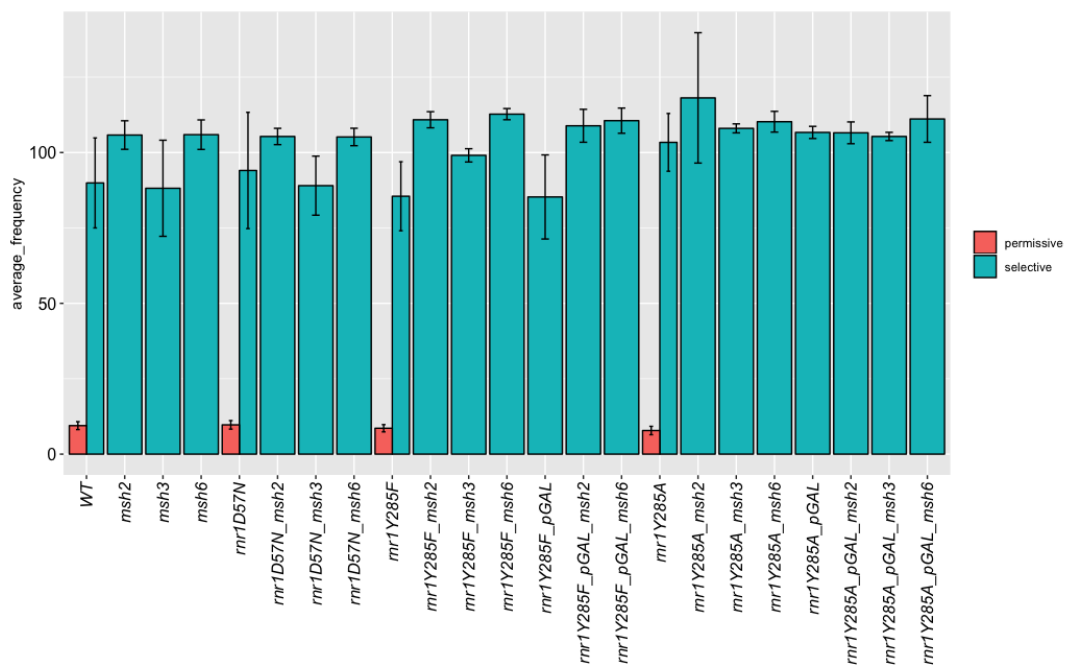**B**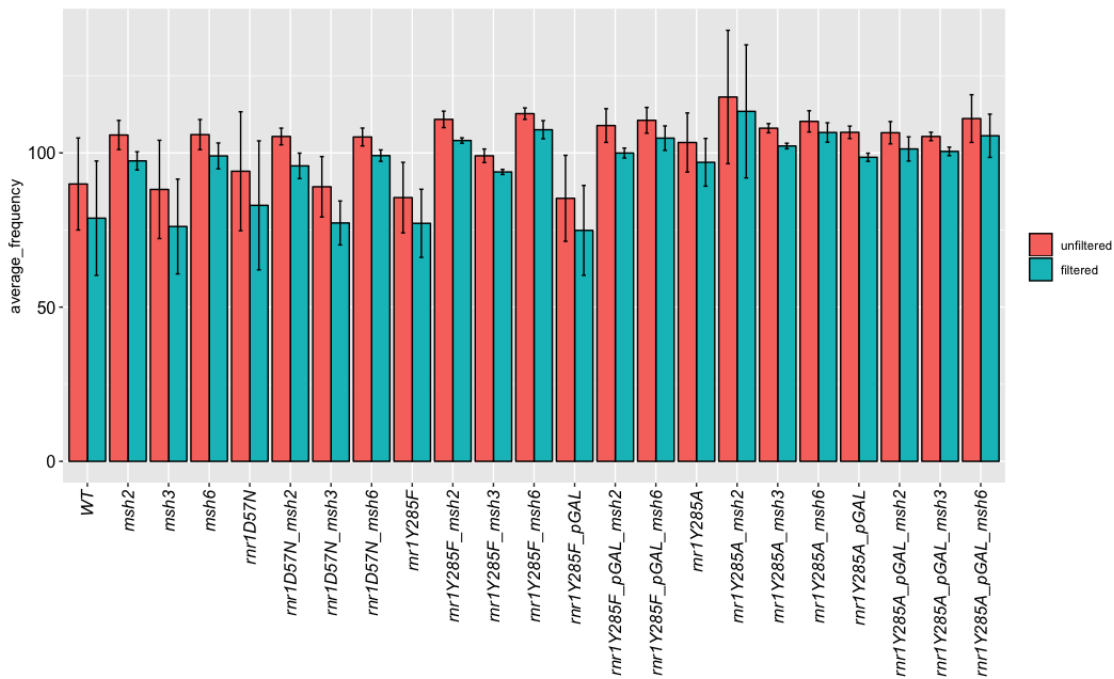**Figure S1.**

Supplement: iyac092_fig_s1.pdf [file iyac092_fig_s1.pdf]

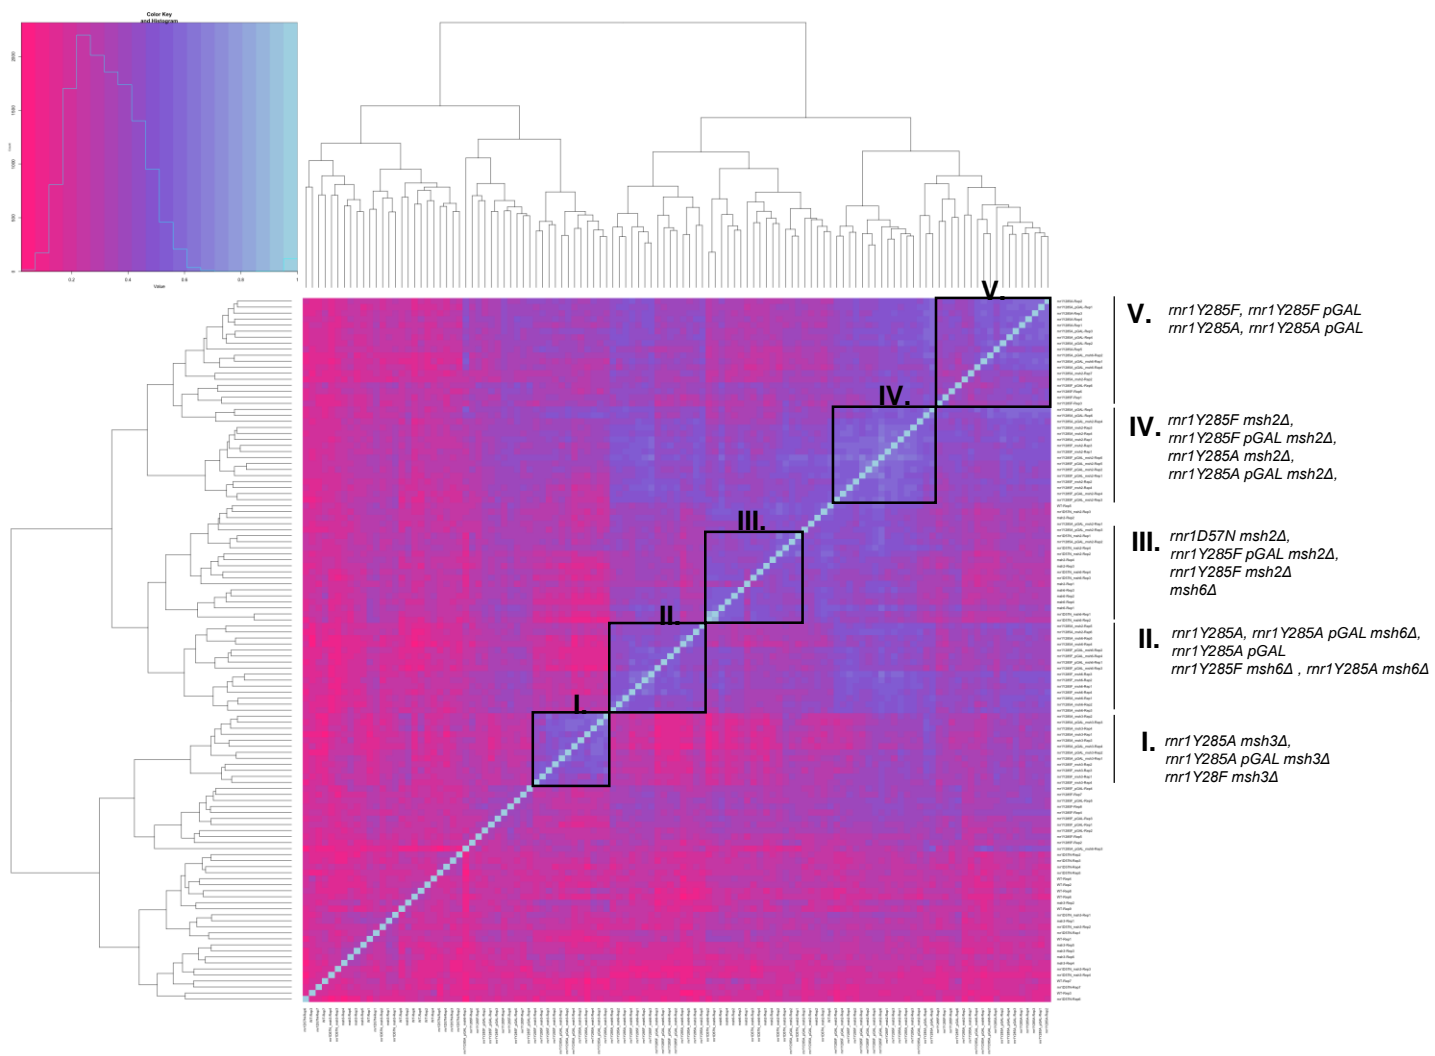

**Figure S2**

Supplement: iyac092_fig_s2.pdf [file iyac092_fig_s2.pdf]

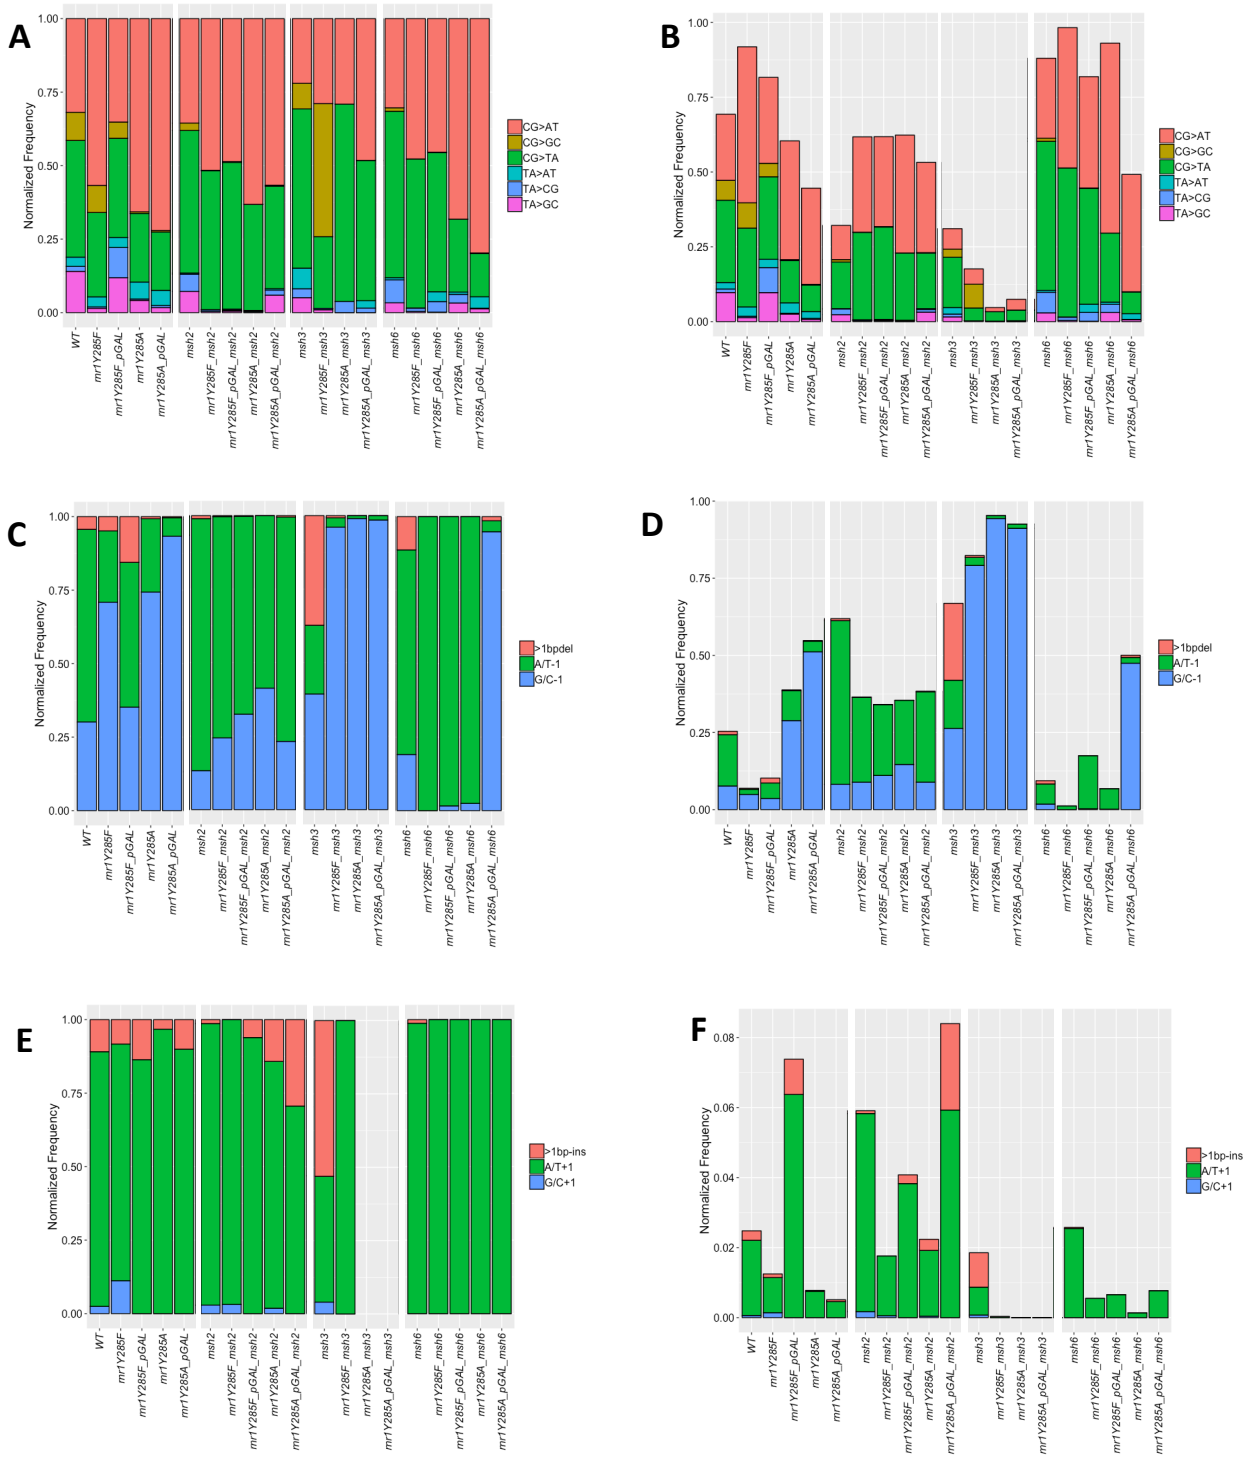

Figure S3

Supplement: iyac092_fig_s3.pdf [file iyac092_fig_s3.pdf]

**A**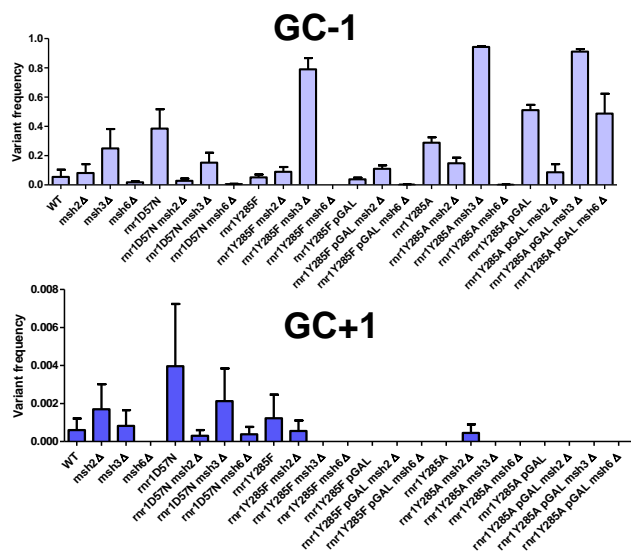**B**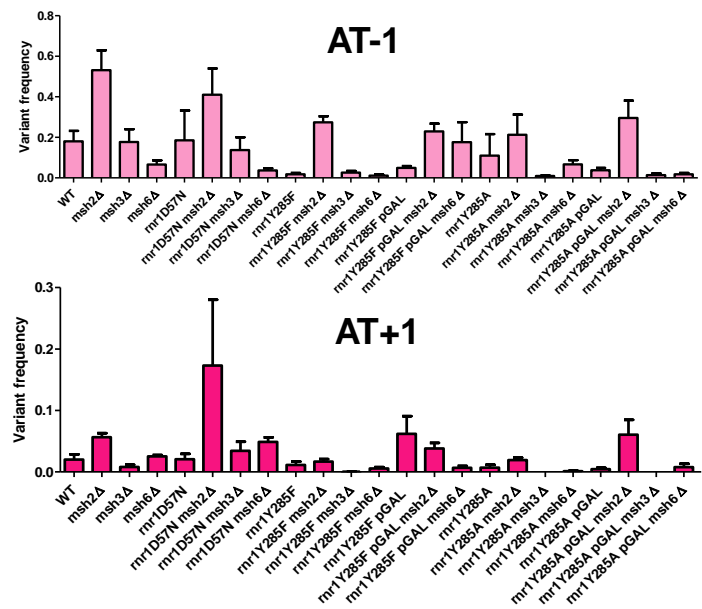**C**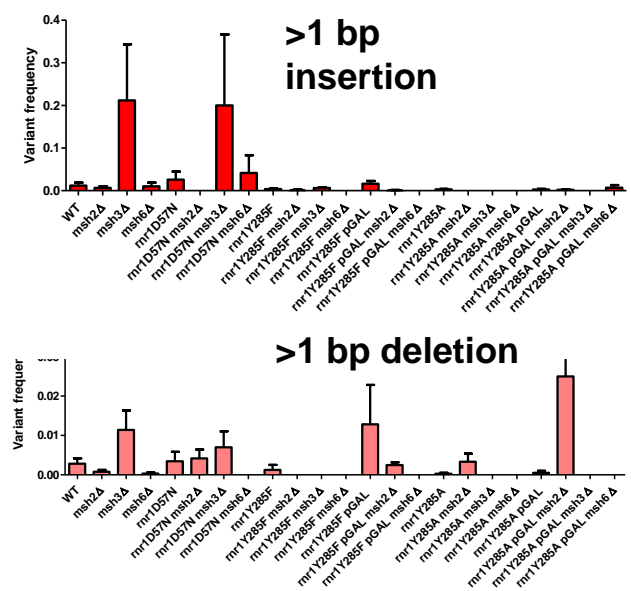**D**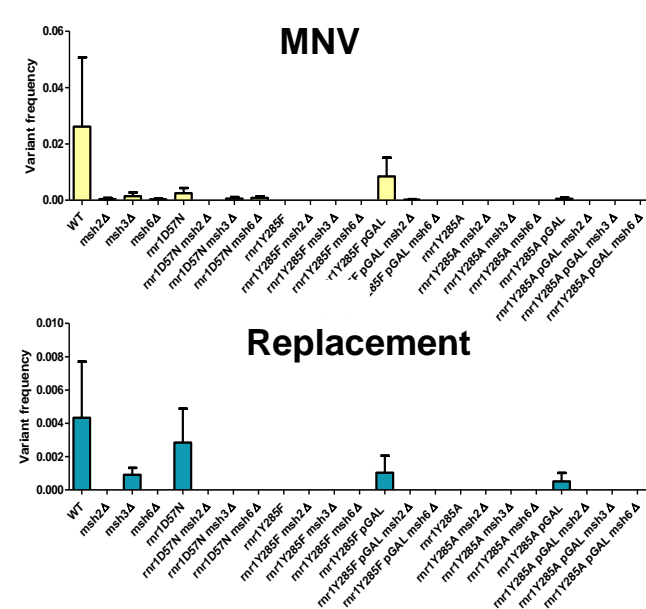

Figure S4.

E

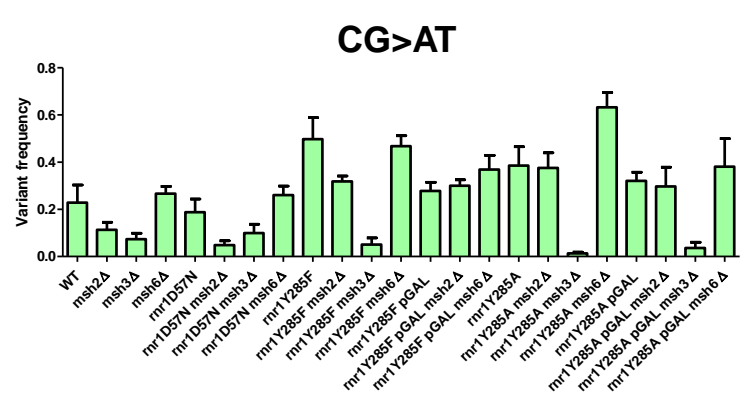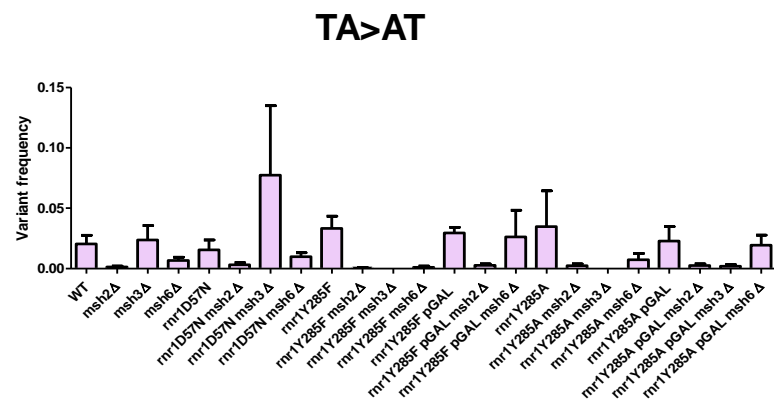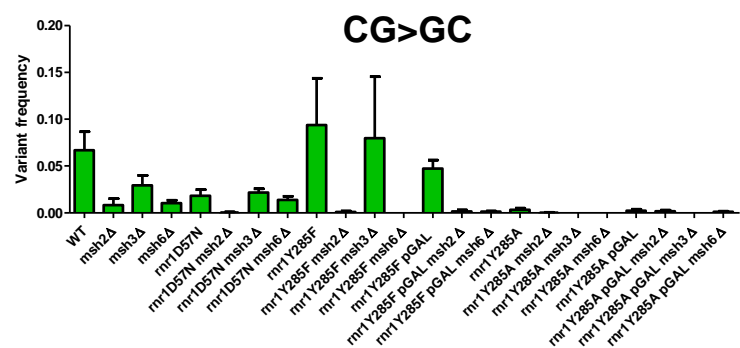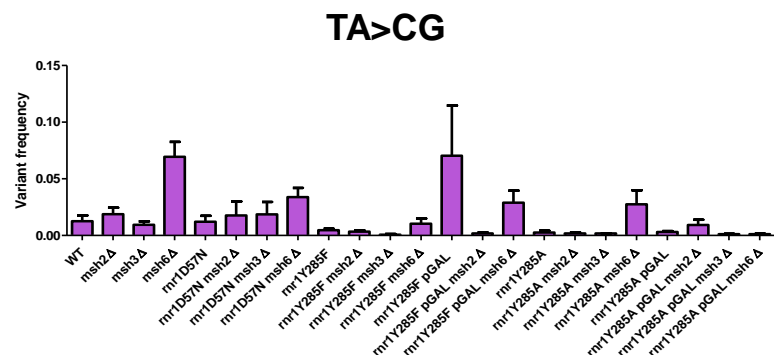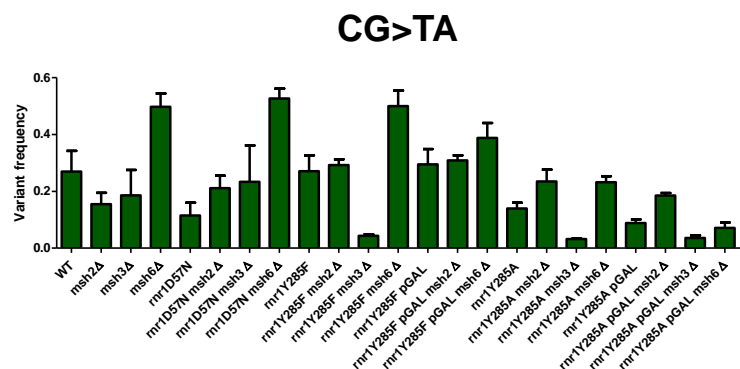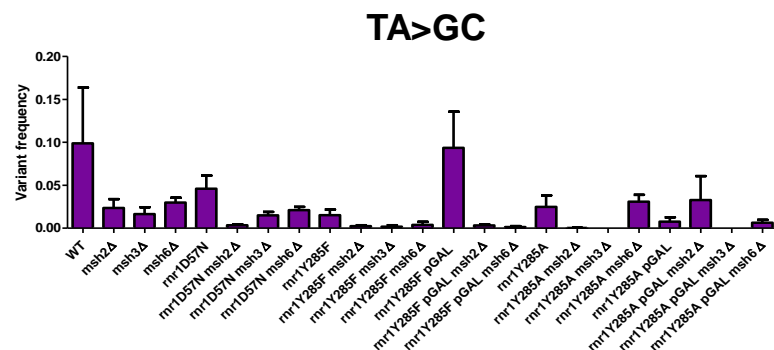

Figure S4 cont'd.

Supplement: iyac092_fig_s4.pdf [file iyac092_fig_s4.pdf]
